# Supplementary material for: A Pan-Cancer Atlas of Metabolic Regulatory Circuitries Integrating Multi-Omic, Immune, and Clinical Dimensions
Source: Research Square preprint supplement (doi:10.21203/rs.3.rs-8280481/v1), 2025-12-10
Supplement: Supplementary file 2 [file e3e4875b0fa412a6ab1cdbce.xlsx]

## Sheet: Supplementary table index
Supplementary table index
Table S1	KEGG Metabolic Pathways and Their 1,406 Enzyme-Coding Genes
Table S2	Experimentally Supported microRNAs Regulating the 1,406 Enzyme-Coding Genes
Table S3	Experimentally Supported lncRNAs Regulating the 1,406 Enzyme-Coding Genes
Table S4	Transcript Isoforms Associated with Enzyme-Coding Genes
Table S5	Transcript Isoforms Associated with Regulatory RNAs (lncRNAs)
Table S6	Metabolic Regulated Cell Death (RCD) Mechanisms and Their Associated Genes
Table S7	TCGA Tumor Abbreviations and Full Cancer Type Names
Table S8	Functional Classification of Tumor-Infiltrating Immune and Stromal Cells with Supporting Evidence
Table S9	Distribution of Significant Associations Between Omic Layers and Tumor Phenotypes (MSI, TMB, and Stemness) Across TCGA Cancer Types
Table S10	Distribution of Significant Associations Across KEGG Metabolic Categories for Each Tumor Phenotype (MSI, TMB, and Stemness)
Table S11	Distribution of Significant Associations Across Metabolic Cell Death Mechanisms for Each Tumor Phenotype (MSI, TMB, and Stemness)
Table S12	Distribution of Metabolic Signatures Across Tumor Microenvironment Classes (Anti-tumoral, Dual, Pro-tumoral) by Omic Layer
Table S13	Distribution of Metabolic Signatures Across Tumor Microenvironment Classes (Anti-tumoral, Dual, Pro-tumoral) by KEGG Metabolic Category
Table S14	Distribution of Metabolic Signatures Across Tumor Microenvironment Classes (Anti-tumoral, Dual, Pro-tumoral) by Metabolic Cell Death Mechanism
Table S15	Distribution of Metabolic Signatures Across Immune Classification Groups (Cold, Hot, Variable) by Omic Layer
Table S16	Distribution of Metabolic Signatures Across Immune Classification Groups (Cold, Hot, Variable) by KEGG Metabolic Category
Table S17	Distribution of Metabolic Signatures Across Immune Classification Groups (Cold, Hot, Variable) by Metabolic Cell Death Mechanism
Table S18	Distribution of Metabolic Signatures Across Cox OS (Protective, Risky) by Omic Layer
Table S19	Distribution of Metabolic Signatures Across Cox OS (Protective, Risky) by KEGG Metabolic Category
Table S20	Distribution of Metabolic Signatures Across Cox OS (Protective, Risky) by Metabolic Cell Death Mechanism
Table S21	Distribution of Metabolic Signatures Across Cox DSS Classes (Protective, Risky) by Omic Layer
Table S22	Distribution of Metabolic Signatures Across Cox DSS Classes (Protective, Risky) by KEGG Metabolic Category
Table S23	Distribution of Metabolic Signatures Across Cox DSS Classes (Protective, Risky) by Metabolic Cell Death Mechanism
Table S24	Distribution of Metabolic Signatures Across Cox DFI Classes (Protective, Risky) by Omic Layer
Table S25	Distribution of Metabolic Signatures Across Cox DFI Classes (Protective, Risky) by KEGG Metabolic Category
Table S26	Distribution of Metabolic Signatures Across Cox DFI Classes (Protective, Risky) by Metabolic Cell Death Mechanism
Table S27	Distribution of Metabolic Signatures Across Cox PFI Classes (Protective, Risky) by Omic Layer
Table S28	Distribution of Metabolic Signatures Across Cox PFI Classes (Protective, Risky) by KEGG Metabolic Category
Table S29	Distribution of Metabolic Signatures Across Cox PFI Classes (Protective, Risky) by Metabolic Cell Death Mechanism

## Sheet: Table S1
KEGG_ID	Metabolism	Pathways	Genes	Genes_name	Isoforms
hsa00010	Carbohydrate metabolism	Glycolysis / Gluconeogenesis - Homo sapiens (human)	HK3	hexokinase	hexokinase 3
hsa00010	Carbohydrate metabolism	Glycolysis / Gluconeogenesis - Homo sapiens (human)	HK1	hexokinase	hexokinase 1
hsa00010	Carbohydrate metabolism	Glycolysis / Gluconeogenesis - Homo sapiens (human)	HK2	hexokinase	hexokinase 2
hsa00010	Carbohydrate metabolism	Glycolysis / Gluconeogenesis - Homo sapiens (human)	HKDC1	hexokinase	hexokinase domain containing 1
hsa00010	Carbohydrate metabolism	Glycolysis / Gluconeogenesis - Homo sapiens (human)	GCK	glucokinase	glucokinase
hsa00010	Carbohydrate metabolism	Glycolysis / Gluconeogenesis - Homo sapiens (human)	GPI	glucose-6-phosphate	glucose-6-phosphate isomerase
hsa00010	Carbohydrate metabolism	Glycolysis / Gluconeogenesis - Homo sapiens (human)	PFKM	phosphofructokinase,	phosphofructokinase, muscle
hsa00010	Carbohydrate metabolism	Glycolysis / Gluconeogenesis - Homo sapiens (human)	PFKP	phosphofructokinase,	phosphofructokinase, platelet
hsa00010	Carbohydrate metabolism	Glycolysis / Gluconeogenesis - Homo sapiens (human)	PFKL	phosphofructokinase,	phosphofructokinase, liver type
hsa00010	Carbohydrate metabolism	Glycolysis / Gluconeogenesis - Homo sapiens (human)	FBP1	fructose-bisphosphatase	fructose-bisphosphatase 1
hsa00010	Carbohydrate metabolism	Glycolysis / Gluconeogenesis - Homo sapiens (human)	FBP2	fructose-bisphosphatase	fructose-bisphosphatase 2
hsa00010	Carbohydrate metabolism	Glycolysis / Gluconeogenesis - Homo sapiens (human)	ALDOC	aldolase,	aldolase, fructose-bisphosphate C
hsa00010	Carbohydrate metabolism	Glycolysis / Gluconeogenesis - Homo sapiens (human)	ALDOA	aldolase,	aldolase, fructose-bisphosphate A
hsa00010	Carbohydrate metabolism	Glycolysis / Gluconeogenesis - Homo sapiens (human)	ALDOB	aldolase,	aldolase, fructose-bisphosphate B
hsa00010	Carbohydrate metabolism	Glycolysis / Gluconeogenesis - Homo sapiens (human)	TPI1	triosephosphate	triosephosphate isomerase 1
hsa00010	Carbohydrate metabolism	Glycolysis / Gluconeogenesis - Homo sapiens (human)	GAPDH	glyceraldehyde-3-phosphate	glyceraldehyde-3-phosphate dehydrogenase
hsa00010	Carbohydrate metabolism	Glycolysis / Gluconeogenesis - Homo sapiens (human)	GAPDHS	glyceraldehyde-3-phosphate	glyceraldehyde-3-phosphate dehydrogenase, spermatogenic
hsa00010	Carbohydrate metabolism	Glycolysis / Gluconeogenesis - Homo sapiens (human)	PGK2	phosphoglycerate	phosphoglycerate kinase 2
hsa00010	Carbohydrate metabolism	Glycolysis / Gluconeogenesis - Homo sapiens (human)	PGK1	phosphoglycerate	phosphoglycerate kinase 1
hsa00010	Carbohydrate metabolism	Glycolysis / Gluconeogenesis - Homo sapiens (human)	PGAM1	phosphoglycerate	phosphoglycerate mutase 1
hsa00010	Carbohydrate metabolism	Glycolysis / Gluconeogenesis - Homo sapiens (human)	PGAM2	phosphoglycerate	phosphoglycerate mutase 2
hsa00010	Carbohydrate metabolism	Glycolysis / Gluconeogenesis - Homo sapiens (human)	PGAM4	phosphoglycerate	phosphoglycerate mutase family member 4
hsa00010	Carbohydrate metabolism	Glycolysis / Gluconeogenesis - Homo sapiens (human)	ENO3	enolase	enolase 3
hsa00010	Carbohydrate metabolism	Glycolysis / Gluconeogenesis - Homo sapiens (human)	ENO2	enolase	enolase 2
hsa00010	Carbohydrate metabolism	Glycolysis / Gluconeogenesis - Homo sapiens (human)	ENO1	enolase	enolase 1
hsa00010	Carbohydrate metabolism	Glycolysis / Gluconeogenesis - Homo sapiens (human)	ENO4	enolase	enolase 4
hsa00010	Carbohydrate metabolism	Glycolysis / Gluconeogenesis - Homo sapiens (human)	PKM	pyruvate	pyruvate kinase M1/2
hsa00010	Carbohydrate metabolism	Glycolysis / Gluconeogenesis - Homo sapiens (human)	PKLR	pyruvate	pyruvate kinase L/R
hsa00010	Carbohydrate metabolism	Glycolysis / Gluconeogenesis - Homo sapiens (human)	PDHA2	pyruvate	pyruvate dehydrogenase E1 subunit alpha 2
hsa00010	Carbohydrate metabolism	Glycolysis / Gluconeogenesis - Homo sapiens (human)	PDHA1	pyruvate	pyruvate dehydrogenase E1 subunit alpha 1
hsa00010	Carbohydrate metabolism	Glycolysis / Gluconeogenesis - Homo sapiens (human)	PDHB	pyruvate	pyruvate dehydrogenase E1 subunit beta
hsa00010	Carbohydrate metabolism	Glycolysis / Gluconeogenesis - Homo sapiens (human)	DLAT	dihydrolipoamide	dihydrolipoamide S-acetyltransferase
hsa00010	Carbohydrate metabolism	Glycolysis / Gluconeogenesis - Homo sapiens (human)	DLD	dihydrolipoamide	dihydrolipoamide dehydrogenase
hsa00010	Carbohydrate metabolism	Glycolysis / Gluconeogenesis - Homo sapiens (human)	LDHAL6A	lactate	lactate dehydrogenase A like 6A
hsa00010	Carbohydrate metabolism	Glycolysis / Gluconeogenesis - Homo sapiens (human)	LDHAL6B	lactate	lactate dehydrogenase A like 6B
hsa00010	Carbohydrate metabolism	Glycolysis / Gluconeogenesis - Homo sapiens (human)	LDHA	lactate	lactate dehydrogenase A
hsa00010	Carbohydrate metabolism	Glycolysis / Gluconeogenesis - Homo sapiens (human)	LDHB	lactate	lactate dehydrogenase B
hsa00010	Carbohydrate metabolism	Glycolysis / Gluconeogenesis - Homo sapiens (human)	LDHC	lactate	lactate dehydrogenase C
hsa00010	Carbohydrate metabolism	Glycolysis / Gluconeogenesis - Homo sapiens (human)	ADH1A	alcohol	alcohol dehydrogenase 1A (class I), alpha polypeptide
hsa00010	Carbohydrate metabolism	Glycolysis / Gluconeogenesis - Homo sapiens (human)	ADH1B	alcohol	alcohol dehydrogenase 1B (class I), beta polypeptide
hsa00010	Carbohydrate metabolism	Glycolysis / Gluconeogenesis - Homo sapiens (human)	ADH1C	alcohol	alcohol dehydrogenase 1C (class I), gamma polypeptide
hsa00010	Carbohydrate metabolism	Glycolysis / Gluconeogenesis - Homo sapiens (human)	ADH7	alcohol	alcohol dehydrogenase 7 (class IV), mu or sigma polypeptide
hsa00010	Carbohydrate metabolism	Glycolysis / Gluconeogenesis - Homo sapiens (human)	ADH4	alcohol	alcohol dehydrogenase 4 (class II), pi polypeptide
hsa00010	Carbohydrate metabolism	Glycolysis / Gluconeogenesis - Homo sapiens (human)	ADH5	alcohol	alcohol dehydrogenase 5 (class III), chi polypeptide
hsa00010	Carbohydrate metabolism	Glycolysis / Gluconeogenesis - Homo sapiens (human)	ADH6	alcohol	alcohol dehydrogenase 6 (class V)
hsa00010	Carbohydrate metabolism	Glycolysis / Gluconeogenesis - Homo sapiens (human)	AKR1A1	aldo-keto	aldo-keto reductase family 1 member A1
hsa00010	Carbohydrate metabolism	Glycolysis / Gluconeogenesis - Homo sapiens (human)	ALDH2	aldehyde	aldehyde dehydrogenase 2 family member
hsa00010	Carbohydrate metabolism	Glycolysis / Gluconeogenesis - Homo sapiens (human)	ALDH3A2	aldehyde	aldehyde dehydrogenase 3 family member A2
hsa00010	Carbohydrate metabolism	Glycolysis / Gluconeogenesis - Homo sapiens (human)	ALDH1B1	aldehyde	aldehyde dehydrogenase 1 family member B1
hsa00010	Carbohydrate metabolism	Glycolysis / Gluconeogenesis - Homo sapiens (human)	ALDH7A1	aldehyde	aldehyde dehydrogenase 7 family member A1
hsa00010	Carbohydrate metabolism	Glycolysis / Gluconeogenesis - Homo sapiens (human)	ALDH9A1	aldehyde	aldehyde dehydrogenase 9 family member A1
hsa00010	Carbohydrate metabolism	Glycolysis / Gluconeogenesis - Homo sapiens (human)	ALDH3B1	aldehyde	aldehyde dehydrogenase 3 family member B1
hsa00010	Carbohydrate metabolism	Glycolysis / Gluconeogenesis - Homo sapiens (human)	ALDH3B2	aldehyde	aldehyde dehydrogenase 3 family member B2
hsa00010	Carbohydrate metabolism	Glycolysis / Gluconeogenesis - Homo sapiens (human)	ALDH3A1	aldehyde	aldehyde dehydrogenase 3 family member A1
hsa00010	Carbohydrate metabolism	Glycolysis / Gluconeogenesis - Homo sapiens (human)	ACSS1	acyl-CoA	acyl-CoA synthetase short chain family member 1
hsa00010	Carbohydrate metabolism	Glycolysis / Gluconeogenesis - Homo sapiens (human)	ACSS2	acyl-CoA	acyl-CoA synthetase short chain family member 2
hsa00010	Carbohydrate metabolism	Glycolysis / Gluconeogenesis - Homo sapiens (human)	GALM	galactose	galactose mutarotase
hsa00010	Carbohydrate metabolism	Glycolysis / Gluconeogenesis - Homo sapiens (human)	PGM1	phosphoglucomutase	phosphoglucomutase 1
hsa00010	Carbohydrate metabolism	Glycolysis / Gluconeogenesis - Homo sapiens (human)	PGM2	phosphoglucomutase	phosphoglucomutase 2
hsa00010	Carbohydrate metabolism	Glycolysis / Gluconeogenesis - Homo sapiens (human)	G6PC	glucose-6-phosphatase	glucose-6-phosphatase catalytic subunit 1
hsa00010	Carbohydrate metabolism	Glycolysis / Gluconeogenesis - Homo sapiens (human)	G6PC2	glucose-6-phosphatase	glucose-6-phosphatase catalytic subunit 2
hsa00010	Carbohydrate metabolism	Glycolysis / Gluconeogenesis - Homo sapiens (human)	G6PC3	glucose-6-phosphatase	glucose-6-phosphatase catalytic subunit 3
hsa00010	Carbohydrate metabolism	Glycolysis / Gluconeogenesis - Homo sapiens (human)	ADPGK	ADP	ADP dependent glucokinase
hsa00010	Carbohydrate metabolism	Glycolysis / Gluconeogenesis - Homo sapiens (human)	BPGM	bisphosphoglycerate	bisphosphoglycerate mutase
hsa00010	Carbohydrate metabolism	Glycolysis / Gluconeogenesis - Homo sapiens (human)	MINPP1	multiple	multiple inositol-polyphosphate phosphatase 1
hsa00010	Carbohydrate metabolism	Glycolysis / Gluconeogenesis - Homo sapiens (human)	PCK1	phosphoenolpyruvate	phosphoenolpyruvate carboxykinase 1
hsa00010	Carbohydrate metabolism	Glycolysis / Gluconeogenesis - Homo sapiens (human)	PCK2	phosphoenolpyruvate	phosphoenolpyruvate carboxykinase 2, mitochondrial
hsa00020	Carbohydrate metabolism	Citrate cycle (TCA cycle) - Homo sapiens (human)	CS	citrate	citrate synthase
hsa00020	Carbohydrate metabolism	Citrate cycle (TCA cycle) - Homo sapiens (human)	ACLY	ATP	ATP citrate lyase
hsa00020	Carbohydrate metabolism	Citrate cycle (TCA cycle) - Homo sapiens (human)	ACO2	aconitase	aconitase 2
hsa00020	Carbohydrate metabolism	Citrate cycle (TCA cycle) - Homo sapiens (human)	ACO1	aconitase	aconitase 1
hsa00020	Carbohydrate metabolism	Citrate cycle (TCA cycle) - Homo sapiens (human)	IDH1	isocitrate	isocitrate dehydrogenase (NADP(+)) 1
hsa00020	Carbohydrate metabolism	Citrate cycle (TCA cycle) - Homo sapiens (human)	IDH2	isocitrate	isocitrate dehydrogenase (NADP(+)) 2
hsa00020	Carbohydrate metabolism	Citrate cycle (TCA cycle) - Homo sapiens (human)	IDH3B	isocitrate	isocitrate dehydrogenase (NAD(+)) 3 non-catalytic subunit beta
hsa00020	Carbohydrate metabolism	Citrate cycle (TCA cycle) - Homo sapiens (human)	IDH3G	isocitrate	isocitrate dehydrogenase (NAD(+)) 3 non-catalytic subunit gamma
hsa00020	Carbohydrate metabolism	Citrate cycle (TCA cycle) - Homo sapiens (human)	IDH3A	isocitrate	isocitrate dehydrogenase (NAD(+)) 3 catalytic subunit alpha
hsa00020	Carbohydrate metabolism	Citrate cycle (TCA cycle) - Homo sapiens (human)	OGDHL	oxoglutarate	oxoglutarate dehydrogenase L
hsa00020	Carbohydrate metabolism	Citrate cycle (TCA cycle) - Homo sapiens (human)	OGDH	oxoglutarate	oxoglutarate dehydrogenase
hsa00020	Carbohydrate metabolism	Citrate cycle (TCA cycle) - Homo sapiens (human)	DLST	dihydrolipoamide	dihydrolipoamide S-succinyltransferase
hsa00020	Carbohydrate metabolism	Citrate cycle (TCA cycle) - Homo sapiens (human)	DLD	dihydrolipoamide	dihydrolipoamide dehydrogenase
hsa00020	Carbohydrate metabolism	Citrate cycle (TCA cycle) - Homo sapiens (human)	SUCLG1	succinate-CoA	succinate-CoA ligase GDP/ADP-forming subunit alpha
hsa00020	Carbohydrate metabolism	Citrate cycle (TCA cycle) - Homo sapiens (human)	SUCLG2	succinate-CoA	succinate-CoA ligase GDP-forming subunit beta
hsa00020	Carbohydrate metabolism	Citrate cycle (TCA cycle) - Homo sapiens (human)	SUCLA2	succinate-CoA	succinate-CoA ligase ADP-forming subunit beta
hsa00020	Carbohydrate metabolism	Citrate cycle (TCA cycle) - Homo sapiens (human)	SDHA	succinate	succinate dehydrogenase complex flavoprotein subunit A
hsa00020	Carbohydrate metabolism	Citrate cycle (TCA cycle) - Homo sapiens (human)	SDHB	succinate	succinate dehydrogenase complex iron sulfur subunit B
hsa00020	Carbohydrate metabolism	Citrate cycle (TCA cycle) - Homo sapiens (human)	SDHC	succinate	succinate dehydrogenase complex subunit C
hsa00020	Carbohydrate metabolism	Citrate cycle (TCA cycle) - Homo sapiens (human)	SDHD	succinate	succinate dehydrogenase complex subunit D
hsa00020	Carbohydrate metabolism	Citrate cycle (TCA cycle) - Homo sapiens (human)	FH	fumarate	fumarate hydratase
hsa00020	Carbohydrate metabolism	Citrate cycle (TCA cycle) - Homo sapiens (human)	MDH1	malate	malate dehydrogenase 1
hsa00020	Carbohydrate metabolism	Citrate cycle (TCA cycle) - Homo sapiens (human)	MDH2	malate	malate dehydrogenase 2
hsa00020	Carbohydrate metabolism	Citrate cycle (TCA cycle) - Homo sapiens (human)	PC	pyruvate	pyruvate carboxylase
hsa00020	Carbohydrate metabolism	Citrate cycle (TCA cycle) - Homo sapiens (human)	PCK1	phosphoenolpyruvate	phosphoenolpyruvate carboxykinase 1
hsa00020	Carbohydrate metabolism	Citrate cycle (TCA cycle) - Homo sapiens (human)	PCK2	phosphoenolpyruvate	phosphoenolpyruvate carboxykinase 2, mitochondrial
hsa00020	Carbohydrate metabolism	Citrate cycle (TCA cycle) - Homo sapiens (human)	PDHA2	pyruvate	pyruvate dehydrogenase E1 subunit alpha 2
hsa00020	Carbohydrate metabolism	Citrate cycle (TCA cycle) - Homo sapiens (human)	PDHA1	pyruvate	pyruvate dehydrogenase E1 subunit alpha 1
hsa00020	Carbohydrate metabolism	Citrate cycle (TCA cycle) - Homo sapiens (human)	PDHB	pyruvate	pyruvate dehydrogenase E1 subunit beta
hsa00020	Carbohydrate metabolism	Citrate cycle (TCA cycle) - Homo sapiens (human)	DLAT	dihydrolipoamide	dihydrolipoamide S-acetyltransferase
hsa00030	Carbohydrate metabolism	Pentose phosphate pathway - Homo sapiens (human)	GPI	glucose-6-phosphate	glucose-6-phosphate isomerase
hsa00030	Carbohydrate metabolism	Pentose phosphate pathway - Homo sapiens (human)	G6PD	glucose-6-phosphate	glucose-6-phosphate dehydrogenase
hsa00030	Carbohydrate metabolism	Pentose phosphate pathway - Homo sapiens (human)	PGLS	6-phosphogluconolactonase	6-phosphogluconolactonase
hsa00030	Carbohydrate metabolism	Pentose phosphate pathway - Homo sapiens (human)	H6PD	hexose-6-phosphate	hexose-6-phosphate dehydrogenase/glucose 1-dehydrogenase
hsa00030	Carbohydrate metabolism	Pentose phosphate pathway - Homo sapiens (human)	PGD	phosphogluconate	phosphogluconate dehydrogenase
hsa00030	Carbohydrate metabolism	Pentose phosphate pathway - Homo sapiens (human)	RPE	ribulose-5-phosphate-3-epimerase	ribulose-5-phosphate-3-epimerase
hsa00030	Carbohydrate metabolism	Pentose phosphate pathway - Homo sapiens (human)	RPEL1	ribulose-5-phosphate-3-epimerase	ribulose-5-phosphate-3-epimerase like 1
hsa00030	Carbohydrate metabolism	Pentose phosphate pathway - Homo sapiens (human)	TKT	transketolase	transketolase
hsa00030	Carbohydrate metabolism	Pentose phosphate pathway - Homo sapiens (human)	TKTL2	transketolase	transketolase like 2
hsa00030	Carbohydrate metabolism	Pentose phosphate pathway - Homo sapiens (human)	TKTL1	transketolase	transketolase like 1
hsa00030	Carbohydrate metabolism	Pentose phosphate pathway - Homo sapiens (human)	TALDO1	transaldolase	transaldolase 1
hsa00030	Carbohydrate metabolism	Pentose phosphate pathway - Homo sapiens (human)	RPIA	ribose	ribose 5-phosphate isomerase A
hsa00030	Carbohydrate metabolism	Pentose phosphate pathway - Homo sapiens (human)	SHPK	sedoheptulokinase	sedoheptulokinase
hsa00030	Carbohydrate metabolism	Pentose phosphate pathway - Homo sapiens (human)	DERA	deoxyribose-phosphate	deoxyribose-phosphate aldolase
hsa00030	Carbohydrate metabolism	Pentose phosphate pathway - Homo sapiens (human)	RBKS	ribokinase	ribokinase
hsa00030	Carbohydrate metabolism	Pentose phosphate pathway - Homo sapiens (human)	PGM1	phosphoglucomutase	phosphoglucomutase 1
hsa00030	Carbohydrate metabolism	Pentose phosphate pathway - Homo sapiens (human)	PGM2	phosphoglucomutase	phosphoglucomutase 2
hsa00030	Carbohydrate metabolism	Pentose phosphate pathway - Homo sapiens (human)	PRPS1L1	phosphoribosyl	phosphoribosyl pyrophosphate synthetase 1 like 1
hsa00030	Carbohydrate metabolism	Pentose phosphate pathway - Homo sapiens (human)	PRPS2	phosphoribosyl	phosphoribosyl pyrophosphate synthetase 2
hsa00030	Carbohydrate metabolism	Pentose phosphate pathway - Homo sapiens (human)	PRPS1	phosphoribosyl	phosphoribosyl pyrophosphate synthetase 1
hsa00030	Carbohydrate metabolism	Pentose phosphate pathway - Homo sapiens (human)	RGN	regucalcin	regucalcin
hsa00030	Carbohydrate metabolism	Pentose phosphate pathway - Homo sapiens (human)	IDNK	IDNK	IDNK gluconokinase
hsa00030	Carbohydrate metabolism	Pentose phosphate pathway - Homo sapiens (human)	GLYCTK	glycerate	glycerate kinase
hsa00030	Carbohydrate metabolism	Pentose phosphate pathway - Homo sapiens (human)	ALDOC	aldolase,	aldolase, fructose-bisphosphate C
hsa00030	Carbohydrate metabolism	Pentose phosphate pathway - Homo sapiens (human)	ALDOA	aldolase,	aldolase, fructose-bisphosphate A
hsa00030	Carbohydrate metabolism	Pentose phosphate pathway - Homo sapiens (human)	ALDOB	aldolase,	aldolase, fructose-bisphosphate B
hsa00030	Carbohydrate metabolism	Pentose phosphate pathway - Homo sapiens (human)	FBP1	fructose-bisphosphatase	fructose-bisphosphatase 1
hsa00030	Carbohydrate metabolism	Pentose phosphate pathway - Homo sapiens (human)	FBP2	fructose-bisphosphatase	fructose-bisphosphatase 2
hsa00030	Carbohydrate metabolism	Pentose phosphate pathway - Homo sapiens (human)	PFKM	phosphofructokinase,	phosphofructokinase, muscle
hsa00030	Carbohydrate metabolism	Pentose phosphate pathway - Homo sapiens (human)	PFKP	phosphofructokinase,	phosphofructokinase, platelet
hsa00030	Carbohydrate metabolism	Pentose phosphate pathway - Homo sapiens (human)	PFKL	phosphofructokinase,	phosphofructokinase, liver type
hsa00040	Carbohydrate metabolism	Pentose and glucuronate interconversions - Homo sapiens (human)	GUSB	glucuronidase	glucuronidase beta
hsa00040	Carbohydrate metabolism	Pentose and glucuronate interconversions - Homo sapiens (human)	KL	klotho	klotho
hsa00040	Carbohydrate metabolism	Pentose and glucuronate interconversions - Homo sapiens (human)	UGT2A1	UDP	UDP glucuronosyltransferase family 2 member A1 complex locus
hsa00040	Carbohydrate metabolism	Pentose and glucuronate interconversions - Homo sapiens (human)	UGT2A3	UDP	UDP glucuronosyltransferase family 2 member A3
hsa00040	Carbohydrate metabolism	Pentose and glucuronate interconversions - Homo sapiens (human)	UGT2B17	UDP	UDP glucuronosyltransferase family 2 member B17
hsa00040	Carbohydrate metabolism	Pentose and glucuronate interconversions - Homo sapiens (human)	UGT2B11	UDP	UDP glucuronosyltransferase family 2 member B11
hsa00040	Carbohydrate metabolism	Pentose and glucuronate interconversions - Homo sapiens (human)	UGT2B28	UDP	UDP glucuronosyltransferase family 2 member B28
hsa00040	Carbohydrate metabolism	Pentose and glucuronate interconversions - Homo sapiens (human)	UGT1A6	UDP	UDP glucuronosyltransferase family 1 member A6
hsa00040	Carbohydrate metabolism	Pentose and glucuronate interconversions - Homo sapiens (human)	UGT1A4	UDP	UDP glucuronosyltransferase family 1 member A4
hsa00040	Carbohydrate metabolism	Pentose and glucuronate interconversions - Homo sapiens (human)	UGT1A1	UDP	UDP glucuronosyltransferase family 1 member A1
hsa00040	Carbohydrate metabolism	Pentose and glucuronate interconversions - Homo sapiens (human)	UGT1A3	UDP	UDP glucuronosyltransferase family 1 member A3
hsa00040	Carbohydrate metabolism	Pentose and glucuronate interconversions - Homo sapiens (human)	UGT2B10	UDP	UDP glucuronosyltransferase family 2 member B10
hsa00040	Carbohydrate metabolism	Pentose and glucuronate interconversions - Homo sapiens (human)	UGT1A9	UDP	UDP glucuronosyltransferase family 1 member A9
hsa00040	Carbohydrate metabolism	Pentose and glucuronate interconversions - Homo sapiens (human)	UGT2B7	UDP	UDP glucuronosyltransferase family 2 member B7
hsa00040	Carbohydrate metabolism	Pentose and glucuronate interconversions - Homo sapiens (human)	UGT1A10	UDP	UDP glucuronosyltransferase family 1 member A10
hsa00040	Carbohydrate metabolism	Pentose and glucuronate interconversions - Homo sapiens (human)	UGT1A8	UDP	UDP glucuronosyltransferase family 1 member A8
hsa00040	Carbohydrate metabolism	Pentose and glucuronate interconversions - Homo sapiens (human)	UGT1A5	UDP	UDP glucuronosyltransferase family 1 member A5
hsa00040	Carbohydrate metabolism	Pentose and glucuronate interconversions - Homo sapiens (human)	UGT2B15	UDP	UDP glucuronosyltransferase family 2 member B15
hsa00040	Carbohydrate metabolism	Pentose and glucuronate interconversions - Homo sapiens (human)	UGT1A7	UDP	UDP glucuronosyltransferase family 1 member A7
hsa00040	Carbohydrate metabolism	Pentose and glucuronate interconversions - Homo sapiens (human)	UGT2B4	UDP	UDP glucuronosyltransferase family 2 member B4
hsa00040	Carbohydrate metabolism	Pentose and glucuronate interconversions - Homo sapiens (human)	UGT2A2	UDP	UDP glucuronosyltransferase family 2 member A2
hsa00040	Carbohydrate metabolism	Pentose and glucuronate interconversions - Homo sapiens (human)	UGDH	UDP-glucose	UDP-glucose 6-dehydrogenase
hsa00040	Carbohydrate metabolism	Pentose and glucuronate interconversions - Homo sapiens (human)	UGP2	UDP-glucose	UDP-glucose pyrophosphorylase 2
hsa00040	Carbohydrate metabolism	Pentose and glucuronate interconversions - Homo sapiens (human)	AKR1A1	aldo-keto	aldo-keto reductase family 1 member A1
hsa00040	Carbohydrate metabolism	Pentose and glucuronate interconversions - Homo sapiens (human)	CRYL1	crystallin	crystallin lambda 1
hsa00040	Carbohydrate metabolism	Pentose and glucuronate interconversions - Homo sapiens (human)	RPE	ribulose-5-phosphate-3-epimerase	ribulose-5-phosphate-3-epimerase
hsa00040	Carbohydrate metabolism	Pentose and glucuronate interconversions - Homo sapiens (human)	RPEL1	ribulose-5-phosphate-3-epimerase	ribulose-5-phosphate-3-epimerase like 1
hsa00040	Carbohydrate metabolism	Pentose and glucuronate interconversions - Homo sapiens (human)	XYLB	xylulokinase	xylulokinase
hsa00040	Carbohydrate metabolism	Pentose and glucuronate interconversions - Homo sapiens (human)	AKR1B1	aldo-keto	aldo-keto reductase family 1 member B
hsa00040	Carbohydrate metabolism	Pentose and glucuronate interconversions - Homo sapiens (human)	AKR1B10	aldo-keto	aldo-keto reductase family 1 member B10
hsa00040	Carbohydrate metabolism	Pentose and glucuronate interconversions - Homo sapiens (human)	AKR1B15	aldo-keto	aldo-keto reductase family 1 member B15
hsa00040	Carbohydrate metabolism	Pentose and glucuronate interconversions - Homo sapiens (human)	DCXR	dicarbonyl	dicarbonyl and L-xylulose reductase
hsa00040	Carbohydrate metabolism	Pentose and glucuronate interconversions - Homo sapiens (human)	SORD	sorbitol	sorbitol dehydrogenase
hsa00040	Carbohydrate metabolism	Pentose and glucuronate interconversions - Homo sapiens (human)	DHDH	dihydrodiol	dihydrodiol dehydrogenase
hsa00040	Carbohydrate metabolism	Pentose and glucuronate interconversions - Homo sapiens (human)	FGGY	FGGY	FGGY carbohydrate kinase domain containing
hsa00040	Carbohydrate metabolism	Pentose and glucuronate interconversions - Homo sapiens (human)	ISPD	CDP-L-ribitol	CDP-L-ribitol pyrophosphorylase A
hsa00051	Carbohydrate metabolism	Fructose and mannose metabolism - Homo sapiens (human)	MPI	mannose	mannose phosphate isomerase
hsa00051	Carbohydrate metabolism	Fructose and mannose metabolism - Homo sapiens (human)	PMM2	phosphomannomutase	phosphomannomutase 2
hsa00051	Carbohydrate metabolism	Fructose and mannose metabolism - Homo sapiens (human)	PMM1	phosphomannomutase	phosphomannomutase 1
hsa00051	Carbohydrate metabolism	Fructose and mannose metabolism - Homo sapiens (human)	GMPPB	GDP-mannose	GDP-mannose pyrophosphorylase B
hsa00051	Carbohydrate metabolism	Fructose and mannose metabolism - Homo sapiens (human)	GMPPA	GDP-mannose	GDP-mannose pyrophosphorylase A
hsa00051	Carbohydrate metabolism	Fructose and mannose metabolism - Homo sapiens (human)	GMDS	GDP-mannose	GDP-mannose 4,6-dehydratase
hsa00051	Carbohydrate metabolism	Fructose and mannose metabolism - Homo sapiens (human)	TSTA3	GDP-L-fucose	GDP-L-fucose synthase
hsa00051	Carbohydrate metabolism	Fructose and mannose metabolism - Homo sapiens (human)	FPGT	fucose-1-phosphate	fucose-1-phosphate guanylyltransferase
hsa00051	Carbohydrate metabolism	Fructose and mannose metabolism - Homo sapiens (human)	FUK	fucose	fucose kinase
hsa00051	Carbohydrate metabolism	Fructose and mannose metabolism - Homo sapiens (human)	ENOSF1	enolase	enolase superfamily member 1
hsa00051	Carbohydrate metabolism	Fructose and mannose metabolism - Homo sapiens (human)	HK3	hexokinase	hexokinase 3
hsa00051	Carbohydrate metabolism	Fructose and mannose metabolism - Homo sapiens (human)	HK1	hexokinase	hexokinase 1
hsa00051	Carbohydrate metabolism	Fructose and mannose metabolism - Homo sapiens (human)	HK2	hexokinase	hexokinase 2
hsa00051	Carbohydrate metabolism	Fructose and mannose metabolism - Homo sapiens (human)	HKDC1	hexokinase	hexokinase domain containing 1
hsa00051	Carbohydrate metabolism	Fructose and mannose metabolism - Homo sapiens (human)	PFKM	phosphofructokinase,	phosphofructokinase, muscle
hsa00051	Carbohydrate metabolism	Fructose and mannose metabolism - Homo sapiens (human)	PFKP	phosphofructokinase,	phosphofructokinase, platelet
hsa00051	Carbohydrate metabolism	Fructose and mannose metabolism - Homo sapiens (human)	PFKL	phosphofructokinase,	phosphofructokinase, liver type
hsa00051	Carbohydrate metabolism	Fructose and mannose metabolism - Homo sapiens (human)	FBP1	fructose-bisphosphatase	fructose-bisphosphatase 1
hsa00051	Carbohydrate metabolism	Fructose and mannose metabolism - Homo sapiens (human)	FBP2	fructose-bisphosphatase	fructose-bisphosphatase 2
hsa00051	Carbohydrate metabolism	Fructose and mannose metabolism - Homo sapiens (human)	PFKFB1	6-phosphofructo-2-kinase/fructose-2,6-biphosphatase	6-phosphofructo-2-kinase/fructose-2,6-biphosphatase 1
hsa00051	Carbohydrate metabolism	Fructose and mannose metabolism - Homo sapiens (human)	PFKFB2	6-phosphofructo-2-kinase/fructose-2,6-biphosphatase	6-phosphofructo-2-kinase/fructose-2,6-biphosphatase 2
hsa00051	Carbohydrate metabolism	Fructose and mannose metabolism - Homo sapiens (human)	PFKFB3	6-phosphofructo-2-kinase/fructose-2,6-biphosphatase	6-phosphofructo-2-kinase/fructose-2,6-biphosphatase 3
hsa00051	Carbohydrate metabolism	Fructose and mannose metabolism - Homo sapiens (human)	PFKFB4	6-phosphofructo-2-kinase/fructose-2,6-biphosphatase	6-phosphofructo-2-kinase/fructose-2,6-biphosphatase 4
hsa00051	Carbohydrate metabolism	Fructose and mannose metabolism - Homo sapiens (human)	TIGAR	TP53	TP53 induced glycolysis regulatory phosphatase
hsa00051	Carbohydrate metabolism	Fructose and mannose metabolism - Homo sapiens (human)	KHK	ketohexokinase	ketohexokinase
hsa00051	Carbohydrate metabolism	Fructose and mannose metabolism - Homo sapiens (human)	SORD	sorbitol	sorbitol dehydrogenase
hsa00051	Carbohydrate metabolism	Fructose and mannose metabolism - Homo sapiens (human)	AKR1B1	aldo-keto	aldo-keto reductase family 1 member B
hsa00051	Carbohydrate metabolism	Fructose and mannose metabolism - Homo sapiens (human)	AKR1B10	aldo-keto	aldo-keto reductase family 1 member B10
hsa00051	Carbohydrate metabolism	Fructose and mannose metabolism - Homo sapiens (human)	AKR1B15	aldo-keto	aldo-keto reductase family 1 member B15
hsa00051	Carbohydrate metabolism	Fructose and mannose metabolism - Homo sapiens (human)	ALDOC	aldolase,	aldolase, fructose-bisphosphate C
hsa00051	Carbohydrate metabolism	Fructose and mannose metabolism - Homo sapiens (human)	ALDOA	aldolase,	aldolase, fructose-bisphosphate A
hsa00051	Carbohydrate metabolism	Fructose and mannose metabolism - Homo sapiens (human)	ALDOB	aldolase,	aldolase, fructose-bisphosphate B
hsa00051	Carbohydrate metabolism	Fructose and mannose metabolism - Homo sapiens (human)	TPI1	triosephosphate	triosephosphate isomerase 1
hsa00051	Carbohydrate metabolism	Fructose and mannose metabolism - Homo sapiens (human)	TKFC	triokinase	triokinase and FMN cyclase
hsa00052	Carbohydrate metabolism	Galactose metabolism - Homo sapiens (human)	GALM	galactose	galactose mutarotase
hsa00052	Carbohydrate metabolism	Galactose metabolism - Homo sapiens (human)	GALK1	galactokinase	galactokinase 1
hsa00052	Carbohydrate metabolism	Galactose metabolism - Homo sapiens (human)	GALT	galactose-1-phosphate	galactose-1-phosphate uridylyltransferase
hsa00052	Carbohydrate metabolism	Galactose metabolism - Homo sapiens (human)	GALE	UDP-galactose-4-epimerase	UDP-galactose-4-epimerase
hsa00052	Carbohydrate metabolism	Galactose metabolism - Homo sapiens (human)	UGP2	UDP-glucose	UDP-glucose pyrophosphorylase 2
hsa00052	Carbohydrate metabolism	Galactose metabolism - Homo sapiens (human)	PGM1	phosphoglucomutase	phosphoglucomutase 1
hsa00052	Carbohydrate metabolism	Galactose metabolism - Homo sapiens (human)	PGM2	phosphoglucomutase	phosphoglucomutase 2
hsa00052	Carbohydrate metabolism	Galactose metabolism - Homo sapiens (human)	HK3	hexokinase	hexokinase 3
hsa00052	Carbohydrate metabolism	Galactose metabolism - Homo sapiens (human)	HK1	hexokinase	hexokinase 1
hsa00052	Carbohydrate metabolism	Galactose metabolism - Homo sapiens (human)	HK2	hexokinase	hexokinase 2
hsa00052	Carbohydrate metabolism	Galactose metabolism - Homo sapiens (human)	HKDC1	hexokinase	hexokinase domain containing 1
hsa00052	Carbohydrate metabolism	Galactose metabolism - Homo sapiens (human)	GCK	glucokinase	glucokinase
hsa00052	Carbohydrate metabolism	Galactose metabolism - Homo sapiens (human)	G6PC	glucose-6-phosphatase	glucose-6-phosphatase catalytic subunit 1
hsa00052	Carbohydrate metabolism	Galactose metabolism - Homo sapiens (human)	G6PC2	glucose-6-phosphatase	glucose-6-phosphatase catalytic subunit 2
hsa00052	Carbohydrate metabolism	Galactose metabolism - Homo sapiens (human)	G6PC3	glucose-6-phosphatase	glucose-6-phosphatase catalytic subunit 3
hsa00052	Carbohydrate metabolism	Galactose metabolism - Homo sapiens (human)	GLB1	galactosidase	galactosidase beta 1
hsa00052	Carbohydrate metabolism	Galactose metabolism - Homo sapiens (human)	LCT	lactase	lactase
hsa00052	Carbohydrate metabolism	Galactose metabolism - Homo sapiens (human)	LALBA	lactalbumin	lactalbumin alpha
hsa00052	Carbohydrate metabolism	Galactose metabolism - Homo sapiens (human)	B4GALT1	beta-1,4-galactosyltransferase	beta-1,4-galactosyltransferase 1
hsa00052	Carbohydrate metabolism	Galactose metabolism - Homo sapiens (human)	B4GALT2	beta-1,4-galactosyltransferase	beta-1,4-galactosyltransferase 2
hsa00052	Carbohydrate metabolism	Galactose metabolism - Homo sapiens (human)	GLA	galactosidase	galactosidase alpha
hsa00052	Carbohydrate metabolism	Galactose metabolism - Homo sapiens (human)	AKR1B1	aldo-keto	aldo-keto reductase family 1 member B
hsa00052	Carbohydrate metabolism	Galactose metabolism - Homo sapiens (human)	AKR1B10	aldo-keto	aldo-keto reductase family 1 member B10
hsa00052	Carbohydrate metabolism	Galactose metabolism - Homo sapiens (human)	AKR1B15	aldo-keto	aldo-keto reductase family 1 member B15
hsa00052	Carbohydrate metabolism	Galactose metabolism - Homo sapiens (human)	PFKM	phosphofructokinase,	phosphofructokinase, muscle
hsa00052	Carbohydrate metabolism	Galactose metabolism - Homo sapiens (human)	PFKP	phosphofructokinase,	phosphofructokinase, platelet
hsa00052	Carbohydrate metabolism	Galactose metabolism - Homo sapiens (human)	PFKL	phosphofructokinase,	phosphofructokinase, liver type
hsa00052	Carbohydrate metabolism	Galactose metabolism - Homo sapiens (human)	MGAM	maltase-glucoamylase	maltase-glucoamylase
hsa00052	Carbohydrate metabolism	Galactose metabolism - Homo sapiens (human)	MGAM2	maltase-glucoamylase	maltase-glucoamylase 2 (putative)
hsa00052	Carbohydrate metabolism	Galactose metabolism - Homo sapiens (human)	GAA	alpha	alpha glucosidase
hsa00052	Carbohydrate metabolism	Galactose metabolism - Homo sapiens (human)	GANC	glucosidase	glucosidase alpha, neutral C
hsa00052	Carbohydrate metabolism	Galactose metabolism - Homo sapiens (human)	SI	sucrase-isomaltase	sucrase-isomaltase
hsa00053	Carbohydrate metabolism	Ascorbate and aldarate metabolism - Homo sapiens (human)	UGDH	UDP-glucose	UDP-glucose 6-dehydrogenase
hsa00053	Carbohydrate metabolism	Ascorbate and aldarate metabolism - Homo sapiens (human)	UGT2A1	UDP	UDP glucuronosyltransferase family 2 member A1 complex locus
hsa00053	Carbohydrate metabolism	Ascorbate and aldarate metabolism - Homo sapiens (human)	UGT2A3	UDP	UDP glucuronosyltransferase family 2 member A3
hsa00053	Carbohydrate metabolism	Ascorbate and aldarate metabolism - Homo sapiens (human)	UGT2B17	UDP	UDP glucuronosyltransferase family 2 member B17
hsa00053	Carbohydrate metabolism	Ascorbate and aldarate metabolism - Homo sapiens (human)	UGT2B11	UDP	UDP glucuronosyltransferase family 2 member B11
hsa00053	Carbohydrate metabolism	Ascorbate and aldarate metabolism - Homo sapiens (human)	UGT2B28	UDP	UDP glucuronosyltransferase family 2 member B28
hsa00053	Carbohydrate metabolism	Ascorbate and aldarate metabolism - Homo sapiens (human)	UGT1A6	UDP	UDP glucuronosyltransferase family 1 member A6
hsa00053	Carbohydrate metabolism	Ascorbate and aldarate metabolism - Homo sapiens (human)	UGT1A4	UDP	UDP glucuronosyltransferase family 1 member A4
hsa00053	Carbohydrate metabolism	Ascorbate and aldarate metabolism - Homo sapiens (human)	UGT1A1	UDP	UDP glucuronosyltransferase family 1 member A1
hsa00053	Carbohydrate metabolism	Ascorbate and aldarate metabolism - Homo sapiens (human)	UGT1A3	UDP	UDP glucuronosyltransferase family 1 member A3
hsa00053	Carbohydrate metabolism	Ascorbate and aldarate metabolism - Homo sapiens (human)	UGT2B10	UDP	UDP glucuronosyltransferase family 2 member B10
hsa00053	Carbohydrate metabolism	Ascorbate and aldarate metabolism - Homo sapiens (human)	UGT1A9	UDP	UDP glucuronosyltransferase family 1 member A9
hsa00053	Carbohydrate metabolism	Ascorbate and aldarate metabolism - Homo sapiens (human)	UGT2B7	UDP	UDP glucuronosyltransferase family 2 member B7
hsa00053	Carbohydrate metabolism	Ascorbate and aldarate metabolism - Homo sapiens (human)	UGT1A10	UDP	UDP glucuronosyltransferase family 1 member A10
hsa00053	Carbohydrate metabolism	Ascorbate and aldarate metabolism - Homo sapiens (human)	UGT1A8	UDP	UDP glucuronosyltransferase family 1 member A8
hsa00053	Carbohydrate metabolism	Ascorbate and aldarate metabolism - Homo sapiens (human)	UGT1A5	UDP	UDP glucuronosyltransferase family 1 member A5
hsa00053	Carbohydrate metabolism	Ascorbate and aldarate metabolism - Homo sapiens (human)	UGT2B15	UDP	UDP glucuronosyltransferase family 2 member B15
hsa00053	Carbohydrate metabolism	Ascorbate and aldarate metabolism - Homo sapiens (human)	UGT1A7	UDP	UDP glucuronosyltransferase family 1 member A7
hsa00053	Carbohydrate metabolism	Ascorbate and aldarate metabolism - Homo sapiens (human)	UGT2B4	UDP	UDP glucuronosyltransferase family 2 member B4
hsa00053	Carbohydrate metabolism	Ascorbate and aldarate metabolism - Homo sapiens (human)	UGT2A2	UDP	UDP glucuronosyltransferase family 2 member A2
hsa00053	Carbohydrate metabolism	Ascorbate and aldarate metabolism - Homo sapiens (human)	GUSB	glucuronidase	glucuronidase beta
hsa00053	Carbohydrate metabolism	Ascorbate and aldarate metabolism - Homo sapiens (human)	KL	klotho	klotho
hsa00053	Carbohydrate metabolism	Ascorbate and aldarate metabolism - Homo sapiens (human)	MIOX	myo-inositol	myo-inositol oxygenase
hsa00053	Carbohydrate metabolism	Ascorbate and aldarate metabolism - Homo sapiens (human)	AKR1A1	aldo-keto	aldo-keto reductase family 1 member A1
hsa00053	Carbohydrate metabolism	Ascorbate and aldarate metabolism - Homo sapiens (human)	RGN	regucalcin	regucalcin
hsa00053	Carbohydrate metabolism	Ascorbate and aldarate metabolism - Homo sapiens (human)	ALDH2	aldehyde	aldehyde dehydrogenase 2 family member
hsa00053	Carbohydrate metabolism	Ascorbate and aldarate metabolism - Homo sapiens (human)	ALDH3A2	aldehyde	aldehyde dehydrogenase 3 family member A2
hsa00053	Carbohydrate metabolism	Ascorbate and aldarate metabolism - Homo sapiens (human)	ALDH1B1	aldehyde	aldehyde dehydrogenase 1 family member B1
hsa00053	Carbohydrate metabolism	Ascorbate and aldarate metabolism - Homo sapiens (human)	ALDH7A1	aldehyde	aldehyde dehydrogenase 7 family member A1
hsa00053	Carbohydrate metabolism	Ascorbate and aldarate metabolism - Homo sapiens (human)	ALDH9A1	aldehyde	aldehyde dehydrogenase 9 family member A1
hsa00500	Carbohydrate metabolism	Starch and sucrose metabolism - Homo sapiens (human)	MGAM	maltase-glucoamylase	maltase-glucoamylase
hsa00500	Carbohydrate metabolism	Starch and sucrose metabolism - Homo sapiens (human)	MGAM2	maltase-glucoamylase	maltase-glucoamylase 2 (putative)
hsa00500	Carbohydrate metabolism	Starch and sucrose metabolism - Homo sapiens (human)	GAA	alpha	alpha glucosidase
hsa00500	Carbohydrate metabolism	Starch and sucrose metabolism - Homo sapiens (human)	GANC	glucosidase	glucosidase alpha, neutral C
hsa00500	Carbohydrate metabolism	Starch and sucrose metabolism - Homo sapiens (human)	SI	sucrase-isomaltase	sucrase-isomaltase
hsa00500	Carbohydrate metabolism	Starch and sucrose metabolism - Homo sapiens (human)	UGP2	UDP-glucose	UDP-glucose pyrophosphorylase 2
hsa00500	Carbohydrate metabolism	Starch and sucrose metabolism - Homo sapiens (human)	ENPP1	ectonucleotide	ectonucleotide pyrophosphatase/phosphodiesterase 1
hsa00500	Carbohydrate metabolism	Starch and sucrose metabolism - Homo sapiens (human)	ENPP3	ectonucleotide	ectonucleotide pyrophosphatase/phosphodiesterase 3
hsa00500	Carbohydrate metabolism	Starch and sucrose metabolism - Homo sapiens (human)	GBA3	glucosylceramidase	glucosylceramidase beta 3 (gene/pseudogene)
hsa00500	Carbohydrate metabolism	Starch and sucrose metabolism - Homo sapiens (human)	GYS2	glycogen	glycogen synthase 2
hsa00500	Carbohydrate metabolism	Starch and sucrose metabolism - Homo sapiens (human)	GYS1	glycogen	glycogen synthase 1
hsa00500	Carbohydrate metabolism	Starch and sucrose metabolism - Homo sapiens (human)	GYG1	glycogenin	glycogenin 1
hsa00500	Carbohydrate metabolism	Starch and sucrose metabolism - Homo sapiens (human)	GYG2	glycogenin	glycogenin 2
hsa00500	Carbohydrate metabolism	Starch and sucrose metabolism - Homo sapiens (human)	GBE1	1,4-alpha-glucan	1,4-alpha-glucan branching enzyme 1
hsa00500	Carbohydrate metabolism	Starch and sucrose metabolism - Homo sapiens (human)	PYGL	glycogen	glycogen phosphorylase L
hsa00500	Carbohydrate metabolism	Starch and sucrose metabolism - Homo sapiens (human)	PYGM	glycogen	glycogen phosphorylase, muscle associated
hsa00500	Carbohydrate metabolism	Starch and sucrose metabolism - Homo sapiens (human)	PYGB	glycogen	glycogen phosphorylase B
hsa00500	Carbohydrate metabolism	Starch and sucrose metabolism - Homo sapiens (human)	AGL	amylo-alpha-1,	amylo-alpha-1, 6-glucosidase, 4-alpha-glucanotransferase
hsa00500	Carbohydrate metabolism	Starch and sucrose metabolism - Homo sapiens (human)	AMY1C	amylase	amylase alpha 1C
hsa00500	Carbohydrate metabolism	Starch and sucrose metabolism - Homo sapiens (human)	AMY2A	amylase	amylase alpha 2A
hsa00500	Carbohydrate metabolism	Starch and sucrose metabolism - Homo sapiens (human)	AMY1A	amylase	amylase alpha 1A
hsa00500	Carbohydrate metabolism	Starch and sucrose metabolism - Homo sapiens (human)	AMY2B	amylase	amylase alpha 2B
hsa00500	Carbohydrate metabolism	Starch and sucrose metabolism - Homo sapiens (human)	AMY1B	amylase	amylase alpha 1B
hsa00500	Carbohydrate metabolism	Starch and sucrose metabolism - Homo sapiens (human)	TREH	trehalase	trehalase
hsa00500	Carbohydrate metabolism	Starch and sucrose metabolism - Homo sapiens (human)	PGM1	phosphoglucomutase	phosphoglucomutase 1
hsa00500	Carbohydrate metabolism	Starch and sucrose metabolism - Homo sapiens (human)	PGM2	phosphoglucomutase	phosphoglucomutase 2
hsa00500	Carbohydrate metabolism	Starch and sucrose metabolism - Homo sapiens (human)	HK3	hexokinase	hexokinase 3
hsa00500	Carbohydrate metabolism	Starch and sucrose metabolism - Homo sapiens (human)	HK1	hexokinase	hexokinase 1
hsa00500	Carbohydrate metabolism	Starch and sucrose metabolism - Homo sapiens (human)	HK2	hexokinase	hexokinase 2
hsa00500	Carbohydrate metabolism	Starch and sucrose metabolism - Homo sapiens (human)	HKDC1	hexokinase	hexokinase domain containing 1
hsa00500	Carbohydrate metabolism	Starch and sucrose metabolism - Homo sapiens (human)	GCK	glucokinase	glucokinase
hsa00500	Carbohydrate metabolism	Starch and sucrose metabolism - Homo sapiens (human)	G6PC	glucose-6-phosphatase	glucose-6-phosphatase catalytic subunit 1
hsa00500	Carbohydrate metabolism	Starch and sucrose metabolism - Homo sapiens (human)	G6PC2	glucose-6-phosphatase	glucose-6-phosphatase catalytic subunit 2
hsa00500	Carbohydrate metabolism	Starch and sucrose metabolism - Homo sapiens (human)	G6PC3	glucose-6-phosphatase	glucose-6-phosphatase catalytic subunit 3
hsa00500	Carbohydrate metabolism	Starch and sucrose metabolism - Homo sapiens (human)	PGM2L1	phosphoglucomutase	phosphoglucomutase 2 like 1
hsa00500	Carbohydrate metabolism	Starch and sucrose metabolism - Homo sapiens (human)	GPI	glucose-6-phosphate	glucose-6-phosphate isomerase
hsa00520	Carbohydrate metabolism	Amino sugar and nucleotide sugar metabolism - Homo sapiens (human)	CHIA	chitinase	chitinase acidic
hsa00520	Carbohydrate metabolism	Amino sugar and nucleotide sugar metabolism - Homo sapiens (human)	CHIT1	chitinase	chitinase 1
hsa00520	Carbohydrate metabolism	Amino sugar and nucleotide sugar metabolism - Homo sapiens (human)	HEXA	hexosaminidase	hexosaminidase subunit alpha
hsa00520	Carbohydrate metabolism	Amino sugar and nucleotide sugar metabolism - Homo sapiens (human)	HEXB	hexosaminidase	hexosaminidase subunit beta
hsa00520	Carbohydrate metabolism	Amino sugar and nucleotide sugar metabolism - Homo sapiens (human)	NAGK	N-acetylglucosamine	N-acetylglucosamine kinase
hsa00520	Carbohydrate metabolism	Amino sugar and nucleotide sugar metabolism - Homo sapiens (human)	AMDHD2	amidohydrolase	amidohydrolase domain containing 2
hsa00520	Carbohydrate metabolism	Amino sugar and nucleotide sugar metabolism - Homo sapiens (human)	GNPDA1	glucosamine-6-phosphate	glucosamine-6-phosphate deaminase 1
hsa00520	Carbohydrate metabolism	Amino sugar and nucleotide sugar metabolism - Homo sapiens (human)	GNPDA2	glucosamine-6-phosphate	glucosamine-6-phosphate deaminase 2
hsa00520	Carbohydrate metabolism	Amino sugar and nucleotide sugar metabolism - Homo sapiens (human)	HK3	hexokinase	hexokinase 3
hsa00520	Carbohydrate metabolism	Amino sugar and nucleotide sugar metabolism - Homo sapiens (human)	HK1	hexokinase	hexokinase 1
hsa00520	Carbohydrate metabolism	Amino sugar and nucleotide sugar metabolism - Homo sapiens (human)	HK2	hexokinase	hexokinase 2
hsa00520	Carbohydrate metabolism	Amino sugar and nucleotide sugar metabolism - Homo sapiens (human)	HKDC1	hexokinase	hexokinase domain containing 1
hsa00520	Carbohydrate metabolism	Amino sugar and nucleotide sugar metabolism - Homo sapiens (human)	GFPT2	glutamine-fructose-6-phosphate	glutamine-fructose-6-phosphate transaminase 2
hsa00520	Carbohydrate metabolism	Amino sugar and nucleotide sugar metabolism - Homo sapiens (human)	GFPT1	glutamine--fructose-6-phosphate	glutamine--fructose-6-phosphate transaminase 1
hsa00520	Carbohydrate metabolism	Amino sugar and nucleotide sugar metabolism - Homo sapiens (human)	GNPNAT1	glucosamine-phosphate	glucosamine-phosphate N-acetyltransferase 1
hsa00520	Carbohydrate metabolism	Amino sugar and nucleotide sugar metabolism - Homo sapiens (human)	PGM3	phosphoglucomutase	phosphoglucomutase 3
hsa00520	Carbohydrate metabolism	Amino sugar and nucleotide sugar metabolism - Homo sapiens (human)	GALK2	galactokinase	galactokinase 2
hsa00520	Carbohydrate metabolism	Amino sugar and nucleotide sugar metabolism - Homo sapiens (human)	UAP1	UDP-N-acetylglucosamine	UDP-N-acetylglucosamine pyrophosphorylase 1
hsa00520	Carbohydrate metabolism	Amino sugar and nucleotide sugar metabolism - Homo sapiens (human)	UAP1L1	UDP-N-acetylglucosamine	UDP-N-acetylglucosamine pyrophosphorylase 1 like 1
hsa00520	Carbohydrate metabolism	Amino sugar and nucleotide sugar metabolism - Homo sapiens (human)	GNE	glucosamine	glucosamine (UDP-N-acetyl)-2-epimerase/N-acetylmannosamine kinase
hsa00520	Carbohydrate metabolism	Amino sugar and nucleotide sugar metabolism - Homo sapiens (human)	RENBP	renin	renin binding protein
hsa00520	Carbohydrate metabolism	Amino sugar and nucleotide sugar metabolism - Homo sapiens (human)	NANS	N-acetylneuraminate	N-acetylneuraminate synthase
hsa00520	Carbohydrate metabolism	Amino sugar and nucleotide sugar metabolism - Homo sapiens (human)	NANP	N-acetylneuraminic	N-acetylneuraminic acid phosphatase
hsa00520	Carbohydrate metabolism	Amino sugar and nucleotide sugar metabolism - Homo sapiens (human)	NPL	N-acetylneuraminate	N-acetylneuraminate pyruvate lyase
hsa00520	Carbohydrate metabolism	Amino sugar and nucleotide sugar metabolism - Homo sapiens (human)	CMAS	cytidine	cytidine monophosphate N-acetylneuraminic acid synthetase
hsa00520	Carbohydrate metabolism	Amino sugar and nucleotide sugar metabolism - Homo sapiens (human)	CYB5R1	cytochrome	cytochrome b5 reductase 1
hsa00520	Carbohydrate metabolism	Amino sugar and nucleotide sugar metabolism - Homo sapiens (human)	CYB5R3	cytochrome	cytochrome b5 reductase 3
hsa00520	Carbohydrate metabolism	Amino sugar and nucleotide sugar metabolism - Homo sapiens (human)	CYB5R2	cytochrome	cytochrome b5 reductase 2
hsa00520	Carbohydrate metabolism	Amino sugar and nucleotide sugar metabolism - Homo sapiens (human)	CYB5RL	cytochrome	cytochrome b5 reductase like
hsa00520	Carbohydrate metabolism	Amino sugar and nucleotide sugar metabolism - Homo sapiens (human)	CYB5R4	cytochrome	cytochrome b5 reductase 4
hsa00520	Carbohydrate metabolism	Amino sugar and nucleotide sugar metabolism - Homo sapiens (human)	RIPPLY2-CYB5R4	RIPPLY2-CYB5R4	RIPPLY2-CYB5R4 readthrough
hsa00520	Carbohydrate metabolism	Amino sugar and nucleotide sugar metabolism - Homo sapiens (human)	UXS1	UDP-glucuronate	UDP-glucuronate decarboxylase 1
hsa00520	Carbohydrate metabolism	Amino sugar and nucleotide sugar metabolism - Homo sapiens (human)	GCK	glucokinase	glucokinase
hsa00520	Carbohydrate metabolism	Amino sugar and nucleotide sugar metabolism - Homo sapiens (human)	PGM1	phosphoglucomutase	phosphoglucomutase 1
hsa00520	Carbohydrate metabolism	Amino sugar and nucleotide sugar metabolism - Homo sapiens (human)	PGM2	phosphoglucomutase	phosphoglucomutase 2
hsa00520	Carbohydrate metabolism	Amino sugar and nucleotide sugar metabolism - Homo sapiens (human)	UGP2	UDP-glucose	UDP-glucose pyrophosphorylase 2
hsa00520	Carbohydrate metabolism	Amino sugar and nucleotide sugar metabolism - Homo sapiens (human)	UGDH	UDP-glucose	UDP-glucose 6-dehydrogenase
hsa00520	Carbohydrate metabolism	Amino sugar and nucleotide sugar metabolism - Homo sapiens (human)	GALK1	galactokinase	galactokinase 1
hsa00520	Carbohydrate metabolism	Amino sugar and nucleotide sugar metabolism - Homo sapiens (human)	GALT	galactose-1-phosphate	galactose-1-phosphate uridylyltransferase
hsa00520	Carbohydrate metabolism	Amino sugar and nucleotide sugar metabolism - Homo sapiens (human)	GALE	UDP-galactose-4-epimerase	UDP-galactose-4-epimerase
hsa00520	Carbohydrate metabolism	Amino sugar and nucleotide sugar metabolism - Homo sapiens (human)	GPI	glucose-6-phosphate	glucose-6-phosphate isomerase
hsa00520	Carbohydrate metabolism	Amino sugar and nucleotide sugar metabolism - Homo sapiens (human)	MPI	mannose	mannose phosphate isomerase
hsa00520	Carbohydrate metabolism	Amino sugar and nucleotide sugar metabolism - Homo sapiens (human)	PMM2	phosphomannomutase	phosphomannomutase 2
hsa00520	Carbohydrate metabolism	Amino sugar and nucleotide sugar metabolism - Homo sapiens (human)	PMM1	phosphomannomutase	phosphomannomutase 1
hsa00520	Carbohydrate metabolism	Amino sugar and nucleotide sugar metabolism - Homo sapiens (human)	GMPPB	GDP-mannose	GDP-mannose pyrophosphorylase B
hsa00520	Carbohydrate metabolism	Amino sugar and nucleotide sugar metabolism - Homo sapiens (human)	GMPPA	GDP-mannose	GDP-mannose pyrophosphorylase A
hsa00520	Carbohydrate metabolism	Amino sugar and nucleotide sugar metabolism - Homo sapiens (human)	GMDS	GDP-mannose	GDP-mannose 4,6-dehydratase
hsa00520	Carbohydrate metabolism	Amino sugar and nucleotide sugar metabolism - Homo sapiens (human)	TSTA3	GDP-L-fucose	GDP-L-fucose synthase
hsa00520	Carbohydrate metabolism	Amino sugar and nucleotide sugar metabolism - Homo sapiens (human)	FUK	fucose	fucose kinase
hsa00520	Carbohydrate metabolism	Amino sugar and nucleotide sugar metabolism - Homo sapiens (human)	FPGT	fucose-1-phosphate	fucose-1-phosphate guanylyltransferase
hsa00620	Carbohydrate metabolism	Pyruvate metabolism - Homo sapiens (human)	ACSS1	acyl-CoA	acyl-CoA synthetase short chain family member 1
hsa00620	Carbohydrate metabolism	Pyruvate metabolism - Homo sapiens (human)	ACSS2	acyl-CoA	acyl-CoA synthetase short chain family member 2
hsa00620	Carbohydrate metabolism	Pyruvate metabolism - Homo sapiens (human)	PDHA2	pyruvate	pyruvate dehydrogenase E1 subunit alpha 2
hsa00620	Carbohydrate metabolism	Pyruvate metabolism - Homo sapiens (human)	PDHA1	pyruvate	pyruvate dehydrogenase E1 subunit alpha 1
hsa00620	Carbohydrate metabolism	Pyruvate metabolism - Homo sapiens (human)	PDHB	pyruvate	pyruvate dehydrogenase E1 subunit beta
hsa00620	Carbohydrate metabolism	Pyruvate metabolism - Homo sapiens (human)	DLAT	dihydrolipoamide	dihydrolipoamide S-acetyltransferase
hsa00620	Carbohydrate metabolism	Pyruvate metabolism - Homo sapiens (human)	DLD	dihydrolipoamide	dihydrolipoamide dehydrogenase
hsa00620	Carbohydrate metabolism	Pyruvate metabolism - Homo sapiens (human)	ADH1A	alcohol	alcohol dehydrogenase 1A (class I), alpha polypeptide
hsa00620	Carbohydrate metabolism	Pyruvate metabolism - Homo sapiens (human)	ADH1B	alcohol	alcohol dehydrogenase 1B (class I), beta polypeptide
hsa00620	Carbohydrate metabolism	Pyruvate metabolism - Homo sapiens (human)	ADH1C	alcohol	alcohol dehydrogenase 1C (class I), gamma polypeptide
hsa00620	Carbohydrate metabolism	Pyruvate metabolism - Homo sapiens (human)	ADH7	alcohol	alcohol dehydrogenase 7 (class IV), mu or sigma polypeptide
hsa00620	Carbohydrate metabolism	Pyruvate metabolism - Homo sapiens (human)	ADH4	alcohol	alcohol dehydrogenase 4 (class II), pi polypeptide
hsa00620	Carbohydrate metabolism	Pyruvate metabolism - Homo sapiens (human)	ADH6	alcohol	alcohol dehydrogenase 6 (class V)
hsa00620	Carbohydrate metabolism	Pyruvate metabolism - Homo sapiens (human)	ADH5	alcohol	alcohol dehydrogenase 5 (class III), chi polypeptide
hsa00620	Carbohydrate metabolism	Pyruvate metabolism - Homo sapiens (human)	AKR1A1	aldo-keto	aldo-keto reductase family 1 member A1
hsa00620	Carbohydrate metabolism	Pyruvate metabolism - Homo sapiens (human)	PKM	pyruvate	pyruvate kinase M1/2
hsa00620	Carbohydrate metabolism	Pyruvate metabolism - Homo sapiens (human)	PKLR	pyruvate	pyruvate kinase L/R
hsa00620	Carbohydrate metabolism	Pyruvate metabolism - Homo sapiens (human)	ACACA	acetyl-CoA	acetyl-CoA carboxylase alpha
hsa00620	Carbohydrate metabolism	Pyruvate metabolism - Homo sapiens (human)	ACACB	acetyl-CoA	acetyl-CoA carboxylase beta
hsa00620	Carbohydrate metabolism	Pyruvate metabolism - Homo sapiens (human)	ACYP2	acylphosphatase	acylphosphatase 2
hsa00620	Carbohydrate metabolism	Pyruvate metabolism - Homo sapiens (human)	ACYP1	acylphosphatase	acylphosphatase 1
hsa00620	Carbohydrate metabolism	Pyruvate metabolism - Homo sapiens (human)	ALDH2	aldehyde	aldehyde dehydrogenase 2 family member
hsa00620	Carbohydrate metabolism	Pyruvate metabolism - Homo sapiens (human)	ALDH3A2	aldehyde	aldehyde dehydrogenase 3 family member A2
hsa00620	Carbohydrate metabolism	Pyruvate metabolism - Homo sapiens (human)	ALDH1B1	aldehyde	aldehyde dehydrogenase 1 family member B1
hsa00620	Carbohydrate metabolism	Pyruvate metabolism - Homo sapiens (human)	ALDH7A1	aldehyde	aldehyde dehydrogenase 7 family member A1
hsa00620	Carbohydrate metabolism	Pyruvate metabolism - Homo sapiens (human)	ALDH9A1	aldehyde	aldehyde dehydrogenase 9 family member A1
hsa00620	Carbohydrate metabolism	Pyruvate metabolism - Homo sapiens (human)	ACOT12	acyl-CoA	acyl-CoA thioesterase 12
hsa00620	Carbohydrate metabolism	Pyruvate metabolism - Homo sapiens (human)	LDHAL6A	lactate	lactate dehydrogenase A like 6A
hsa00620	Carbohydrate metabolism	Pyruvate metabolism - Homo sapiens (human)	LDHAL6B	lactate	lactate dehydrogenase A like 6B
hsa00620	Carbohydrate metabolism	Pyruvate metabolism - Homo sapiens (human)	LDHA	lactate	lactate dehydrogenase A
hsa00620	Carbohydrate metabolism	Pyruvate metabolism - Homo sapiens (human)	LDHB	lactate	lactate dehydrogenase B
hsa00620	Carbohydrate metabolism	Pyruvate metabolism - Homo sapiens (human)	LDHC	lactate	lactate dehydrogenase C
hsa00620	Carbohydrate metabolism	Pyruvate metabolism - Homo sapiens (human)	LDHD	lactate	lactate dehydrogenase D
hsa00620	Carbohydrate metabolism	Pyruvate metabolism - Homo sapiens (human)	GLO1	glyoxalase	glyoxalase I
hsa00620	Carbohydrate metabolism	Pyruvate metabolism - Homo sapiens (human)	HAGH	hydroxyacylglutathione	hydroxyacylglutathione hydrolase
hsa00620	Carbohydrate metabolism	Pyruvate metabolism - Homo sapiens (human)	GRHPR	glyoxylate	glyoxylate and hydroxypyruvate reductase
hsa00620	Carbohydrate metabolism	Pyruvate metabolism - Homo sapiens (human)	ME2	malic	malic enzyme 2
hsa00620	Carbohydrate metabolism	Pyruvate metabolism - Homo sapiens (human)	ME3	malic	malic enzyme 3
hsa00620	Carbohydrate metabolism	Pyruvate metabolism - Homo sapiens (human)	ME1	malic	malic enzyme 1
hsa00620	Carbohydrate metabolism	Pyruvate metabolism - Homo sapiens (human)	PC	pyruvate	pyruvate carboxylase
hsa00620	Carbohydrate metabolism	Pyruvate metabolism - Homo sapiens (human)	MDH1	malate	malate dehydrogenase 1
hsa00620	Carbohydrate metabolism	Pyruvate metabolism - Homo sapiens (human)	MDH2	malate	malate dehydrogenase 2
hsa00620	Carbohydrate metabolism	Pyruvate metabolism - Homo sapiens (human)	FH	fumarate	fumarate hydratase
hsa00620	Carbohydrate metabolism	Pyruvate metabolism - Homo sapiens (human)	PCK1	phosphoenolpyruvate	phosphoenolpyruvate carboxykinase 1
hsa00620	Carbohydrate metabolism	Pyruvate metabolism - Homo sapiens (human)	PCK2	phosphoenolpyruvate	phosphoenolpyruvate carboxykinase 2, mitochondrial
hsa00620	Carbohydrate metabolism	Pyruvate metabolism - Homo sapiens (human)	ACAT2	acetyl-CoA	acetyl-CoA acetyltransferase 2
hsa00620	Carbohydrate metabolism	Pyruvate metabolism - Homo sapiens (human)	ACAT1	acetyl-CoA	acetyl-CoA acetyltransferase 1
hsa00630	Carbohydrate metabolism	Glyoxylate and dicarboxylate metabolism - Homo sapiens (human)	ACSS1	acyl-CoA	acyl-CoA synthetase short chain family member 1
hsa00630	Carbohydrate metabolism	Glyoxylate and dicarboxylate metabolism - Homo sapiens (human)	ACSS2	acyl-CoA	acyl-CoA synthetase short chain family member 2
hsa00630	Carbohydrate metabolism	Glyoxylate and dicarboxylate metabolism - Homo sapiens (human)	MDH1	malate	malate dehydrogenase 1
hsa00630	Carbohydrate metabolism	Glyoxylate and dicarboxylate metabolism - Homo sapiens (human)	MDH2	malate	malate dehydrogenase 2
hsa00630	Carbohydrate metabolism	Glyoxylate and dicarboxylate metabolism - Homo sapiens (human)	CS	citrate	citrate synthase
hsa00630	Carbohydrate metabolism	Glyoxylate and dicarboxylate metabolism - Homo sapiens (human)	ACO2	aconitase	aconitase 2
hsa00630	Carbohydrate metabolism	Glyoxylate and dicarboxylate metabolism - Homo sapiens (human)	ACO1	aconitase	aconitase 1
hsa00630	Carbohydrate metabolism	Glyoxylate and dicarboxylate metabolism - Homo sapiens (human)	ACAT2	acetyl-CoA	acetyl-CoA acetyltransferase 2
hsa00630	Carbohydrate metabolism	Glyoxylate and dicarboxylate metabolism - Homo sapiens (human)	ACAT1	acetyl-CoA	acetyl-CoA acetyltransferase 1
hsa00630	Carbohydrate metabolism	Glyoxylate and dicarboxylate metabolism - Homo sapiens (human)	MCEE	methylmalonyl-CoA	methylmalonyl-CoA epimerase
hsa00630	Carbohydrate metabolism	Glyoxylate and dicarboxylate metabolism - Homo sapiens (human)	PCCA	propionyl-CoA	propionyl-CoA carboxylase subunit alpha
hsa00630	Carbohydrate metabolism	Glyoxylate and dicarboxylate metabolism - Homo sapiens (human)	PCCB	propionyl-CoA	propionyl-CoA carboxylase subunit beta
hsa00630	Carbohydrate metabolism	Glyoxylate and dicarboxylate metabolism - Homo sapiens (human)	MUT	methylmalonyl-CoA	methylmalonyl-CoA mutase
hsa00630	Carbohydrate metabolism	Glyoxylate and dicarboxylate metabolism - Homo sapiens (human)	HAO2	hydroxyacid	hydroxyacid oxidase 2
hsa00630	Carbohydrate metabolism	Glyoxylate and dicarboxylate metabolism - Homo sapiens (human)	HAO1	hydroxyacid	hydroxyacid oxidase 1
hsa00630	Carbohydrate metabolism	Glyoxylate and dicarboxylate metabolism - Homo sapiens (human)	CAT	catalase	catalase
hsa00630	Carbohydrate metabolism	Glyoxylate and dicarboxylate metabolism - Homo sapiens (human)	GRHPR	glyoxylate	glyoxylate and hydroxypyruvate reductase
hsa00630	Carbohydrate metabolism	Glyoxylate and dicarboxylate metabolism - Homo sapiens (human)	PGP	phosphoglycolate	phosphoglycolate phosphatase
hsa00630	Carbohydrate metabolism	Glyoxylate and dicarboxylate metabolism - Homo sapiens (human)	AGXT	alanine--glyoxylate	alanine--glyoxylate aminotransferase
hsa00630	Carbohydrate metabolism	Glyoxylate and dicarboxylate metabolism - Homo sapiens (human)	GLUL	glutamate-ammonia	glutamate-ammonia ligase
hsa00630	Carbohydrate metabolism	Glyoxylate and dicarboxylate metabolism - Homo sapiens (human)	SHMT2	serine	serine hydroxymethyltransferase 2
hsa00630	Carbohydrate metabolism	Glyoxylate and dicarboxylate metabolism - Homo sapiens (human)	SHMT1	serine	serine hydroxymethyltransferase 1
hsa00630	Carbohydrate metabolism	Glyoxylate and dicarboxylate metabolism - Homo sapiens (human)	GLDC	glycine	glycine decarboxylase
hsa00630	Carbohydrate metabolism	Glyoxylate and dicarboxylate metabolism - Homo sapiens (human)	AMT	aminomethyltransferase	aminomethyltransferase
hsa00630	Carbohydrate metabolism	Glyoxylate and dicarboxylate metabolism - Homo sapiens (human)	DLD	dihydrolipoamide	dihydrolipoamide dehydrogenase
hsa00630	Carbohydrate metabolism	Glyoxylate and dicarboxylate metabolism - Homo sapiens (human)	GCSH	glycine	glycine cleavage system protein H
hsa00630	Carbohydrate metabolism	Glyoxylate and dicarboxylate metabolism - Homo sapiens (human)	HYI	hydroxypyruvate	hydroxypyruvate isomerase (putative)
hsa00630	Carbohydrate metabolism	Glyoxylate and dicarboxylate metabolism - Homo sapiens (human)	GLYCTK	glycerate	glycerate kinase
hsa00630	Carbohydrate metabolism	Glyoxylate and dicarboxylate metabolism - Homo sapiens (human)	HOGA1	4-hydroxy-2-oxoglutarate	4-hydroxy-2-oxoglutarate aldolase 1
hsa00630	Carbohydrate metabolism	Glyoxylate and dicarboxylate metabolism - Homo sapiens (human)	AFMID	arylformamidase	arylformamidase
hsa00640	Carbohydrate metabolism	Propanoate metabolism - Homo sapiens (human)	ACSS1	acyl-CoA	acyl-CoA synthetase short chain family member 1
hsa00640	Carbohydrate metabolism	Propanoate metabolism - Homo sapiens (human)	ACSS2	acyl-CoA	acyl-CoA synthetase short chain family member 2
hsa00640	Carbohydrate metabolism	Propanoate metabolism - Homo sapiens (human)	ACSS3	acyl-CoA	acyl-CoA synthetase short chain family member 3
hsa00640	Carbohydrate metabolism	Propanoate metabolism - Homo sapiens (human)	BCKDHA	branched	branched chain keto acid dehydrogenase E1 subunit alpha
hsa00640	Carbohydrate metabolism	Propanoate metabolism - Homo sapiens (human)	BCKDHB	branched	branched chain keto acid dehydrogenase E1 subunit beta
hsa00640	Carbohydrate metabolism	Propanoate metabolism - Homo sapiens (human)	DBT	dihydrolipoamide	dihydrolipoamide branched chain transacylase E2
hsa00640	Carbohydrate metabolism	Propanoate metabolism - Homo sapiens (human)	DLD	dihydrolipoamide	dihydrolipoamide dehydrogenase
hsa00640	Carbohydrate metabolism	Propanoate metabolism - Homo sapiens (human)	ACADS	acyl-CoA	acyl-CoA dehydrogenase short chain
hsa00640	Carbohydrate metabolism	Propanoate metabolism - Homo sapiens (human)	ACOX3	acyl-CoA	acyl-CoA oxidase 3, pristanoyl
hsa00640	Carbohydrate metabolism	Propanoate metabolism - Homo sapiens (human)	ACOX1	acyl-CoA	acyl-CoA oxidase 1
hsa00640	Carbohydrate metabolism	Propanoate metabolism - Homo sapiens (human)	HADHA	hydroxyacyl-CoA	hydroxyacyl-CoA dehydrogenase trifunctional multienzyme complex subunit alpha
hsa00640	Carbohydrate metabolism	Propanoate metabolism - Homo sapiens (human)	EHHADH	enoyl-CoA	enoyl-CoA hydratase and 3-hydroxyacyl CoA dehydrogenase
hsa00640	Carbohydrate metabolism	Propanoate metabolism - Homo sapiens (human)	ECHS1	enoyl-CoA	enoyl-CoA hydratase, short chain 1
hsa00640	Carbohydrate metabolism	Propanoate metabolism - Homo sapiens (human)	HIBCH	3-hydroxyisobutyryl-CoA	3-hydroxyisobutyryl-CoA hydrolase
hsa00640	Carbohydrate metabolism	Propanoate metabolism - Homo sapiens (human)	ACACA	acetyl-CoA	acetyl-CoA carboxylase alpha
hsa00640	Carbohydrate metabolism	Propanoate metabolism - Homo sapiens (human)	ACACB	acetyl-CoA	acetyl-CoA carboxylase beta
hsa00640	Carbohydrate metabolism	Propanoate metabolism - Homo sapiens (human)	MLYCD	malonyl-CoA	malonyl-CoA decarboxylase
hsa00640	Carbohydrate metabolism	Propanoate metabolism - Homo sapiens (human)	ABAT	4-aminobutyrate	4-aminobutyrate aminotransferase
hsa00640	Carbohydrate metabolism	Propanoate metabolism - Homo sapiens (human)	PCCA	propionyl-CoA	propionyl-CoA carboxylase subunit alpha
hsa00640	Carbohydrate metabolism	Propanoate metabolism - Homo sapiens (human)	PCCB	propionyl-CoA	propionyl-CoA carboxylase subunit beta
hsa00640	Carbohydrate metabolism	Propanoate metabolism - Homo sapiens (human)	ECHDC1	ethylmalonyl-CoA	ethylmalonyl-CoA decarboxylase 1
hsa00640	Carbohydrate metabolism	Propanoate metabolism - Homo sapiens (human)	MCEE	methylmalonyl-CoA	methylmalonyl-CoA epimerase
hsa00640	Carbohydrate metabolism	Propanoate metabolism - Homo sapiens (human)	MUT	methylmalonyl-CoA	methylmalonyl-CoA mutase
hsa00640	Carbohydrate metabolism	Propanoate metabolism - Homo sapiens (human)	SUCLG1	succinate-CoA	succinate-CoA ligase GDP/ADP-forming subunit alpha
hsa00640	Carbohydrate metabolism	Propanoate metabolism - Homo sapiens (human)	SUCLG2	succinate-CoA	succinate-CoA ligase GDP-forming subunit beta
hsa00640	Carbohydrate metabolism	Propanoate metabolism - Homo sapiens (human)	SUCLA2	succinate-CoA	succinate-CoA ligase ADP-forming subunit beta
hsa00640	Carbohydrate metabolism	Propanoate metabolism - Homo sapiens (human)	ALDH6A1	aldehyde	aldehyde dehydrogenase 6 family member A1
hsa00640	Carbohydrate metabolism	Propanoate metabolism - Homo sapiens (human)	LDHAL6A	lactate	lactate dehydrogenase A like 6A
hsa00640	Carbohydrate metabolism	Propanoate metabolism - Homo sapiens (human)	LDHAL6B	lactate	lactate dehydrogenase A like 6B
hsa00640	Carbohydrate metabolism	Propanoate metabolism - Homo sapiens (human)	LDHA	lactate	lactate dehydrogenase A
hsa00640	Carbohydrate metabolism	Propanoate metabolism - Homo sapiens (human)	LDHB	lactate	lactate dehydrogenase B
hsa00640	Carbohydrate metabolism	Propanoate metabolism - Homo sapiens (human)	LDHC	lactate	lactate dehydrogenase C
hsa00650	Carbohydrate metabolism	Butanoate metabolism - Homo sapiens (human)	ACAT2	acetyl-CoA	acetyl-CoA acetyltransferase 2
hsa00650	Carbohydrate metabolism	Butanoate metabolism - Homo sapiens (human)	ACAT1	acetyl-CoA	acetyl-CoA acetyltransferase 1
hsa00650	Carbohydrate metabolism	Butanoate metabolism - Homo sapiens (human)	HADH	hydroxyacyl-CoA	hydroxyacyl-CoA dehydrogenase
hsa00650	Carbohydrate metabolism	Butanoate metabolism - Homo sapiens (human)	HADHA	hydroxyacyl-CoA	hydroxyacyl-CoA dehydrogenase trifunctional multienzyme complex subunit alpha
hsa00650	Carbohydrate metabolism	Butanoate metabolism - Homo sapiens (human)	EHHADH	enoyl-CoA	enoyl-CoA hydratase and 3-hydroxyacyl CoA dehydrogenase
hsa00650	Carbohydrate metabolism	Butanoate metabolism - Homo sapiens (human)	ECHS1	enoyl-CoA	enoyl-CoA hydratase, short chain 1
hsa00650	Carbohydrate metabolism	Butanoate metabolism - Homo sapiens (human)	ACADS	acyl-CoA	acyl-CoA dehydrogenase short chain
hsa00650	Carbohydrate metabolism	Butanoate metabolism - Homo sapiens (human)	ACSM1	acyl-CoA	acyl-CoA synthetase medium chain family member 1
hsa00650	Carbohydrate metabolism	Butanoate metabolism - Homo sapiens (human)	ACSM2A	acyl-CoA	acyl-CoA synthetase medium chain family member 2A
hsa00650	Carbohydrate metabolism	Butanoate metabolism - Homo sapiens (human)	ACSM4	acyl-CoA	acyl-CoA synthetase medium chain family member 4
hsa00650	Carbohydrate metabolism	Butanoate metabolism - Homo sapiens (human)	ACSM5	acyl-CoA	acyl-CoA synthetase medium chain family member 5
hsa00650	Carbohydrate metabolism	Butanoate metabolism - Homo sapiens (human)	ACSM3	acyl-CoA	acyl-CoA synthetase medium chain family member 3
hsa00650	Carbohydrate metabolism	Butanoate metabolism - Homo sapiens (human)	ACSM2B	acyl-CoA	acyl-CoA synthetase medium chain family member 2B
hsa00650	Carbohydrate metabolism	Butanoate metabolism - Homo sapiens (human)	ACSM6	acyl-CoA	acyl-CoA synthetase medium chain family member 6
hsa00650	Carbohydrate metabolism	Butanoate metabolism - Homo sapiens (human)	L2HGDH	L-2-hydroxyglutarate	L-2-hydroxyglutarate dehydrogenase
hsa00650	Carbohydrate metabolism	Butanoate metabolism - Homo sapiens (human)	GAD1	glutamate	glutamate decarboxylase 1
hsa00650	Carbohydrate metabolism	Butanoate metabolism - Homo sapiens (human)	GAD2	glutamate	glutamate decarboxylase 2
hsa00650	Carbohydrate metabolism	Butanoate metabolism - Homo sapiens (human)	ABAT	4-aminobutyrate	4-aminobutyrate aminotransferase
hsa00650	Carbohydrate metabolism	Butanoate metabolism - Homo sapiens (human)	ALDH5A1	aldehyde	aldehyde dehydrogenase 5 family member A1
hsa00650	Carbohydrate metabolism	Butanoate metabolism - Homo sapiens (human)	HMGCS1	3-hydroxy-3-methylglutaryl-CoA	3-hydroxy-3-methylglutaryl-CoA synthase 1
hsa00650	Carbohydrate metabolism	Butanoate metabolism - Homo sapiens (human)	HMGCS2	3-hydroxy-3-methylglutaryl-CoA	3-hydroxy-3-methylglutaryl-CoA synthase 2
hsa00650	Carbohydrate metabolism	Butanoate metabolism - Homo sapiens (human)	HMGCL	3-hydroxy-3-methylglutaryl-CoA	3-hydroxy-3-methylglutaryl-CoA lyase
hsa00650	Carbohydrate metabolism	Butanoate metabolism - Homo sapiens (human)	HMGCLL1	3-hydroxy-3-methylglutaryl-CoA	3-hydroxy-3-methylglutaryl-CoA lyase like 1
hsa00650	Carbohydrate metabolism	Butanoate metabolism - Homo sapiens (human)	OXCT1	3-oxoacid	3-oxoacid CoA-transferase 1
hsa00650	Carbohydrate metabolism	Butanoate metabolism - Homo sapiens (human)	OXCT2	3-oxoacid	3-oxoacid CoA-transferase 2
hsa00650	Carbohydrate metabolism	Butanoate metabolism - Homo sapiens (human)	AACS	acetoacetyl-CoA	acetoacetyl-CoA synthetase
hsa00650	Carbohydrate metabolism	Butanoate metabolism - Homo sapiens (human)	BDH1	3-hydroxybutyrate	3-hydroxybutyrate dehydrogenase 1
hsa00562	Carbohydrate metabolism	Inositol phosphate metabolism - Homo sapiens (human)	PIK3C3	phosphatidylinositol	phosphatidylinositol 3-kinase catalytic subunit type 3
hsa00562	Carbohydrate metabolism	Inositol phosphate metabolism - Homo sapiens (human)	MTM1	myotubularin	myotubularin 1
hsa00562	Carbohydrate metabolism	Inositol phosphate metabolism - Homo sapiens (human)	MTMR1	myotubularin	myotubularin related protein 1
hsa00562	Carbohydrate metabolism	Inositol phosphate metabolism - Homo sapiens (human)	MTMR2	myotubularin	myotubularin related protein 2
hsa00562	Carbohydrate metabolism	Inositol phosphate metabolism - Homo sapiens (human)	MTMR3	myotubularin	myotubularin related protein 3
hsa00562	Carbohydrate metabolism	Inositol phosphate metabolism - Homo sapiens (human)	MTMR4	myotubularin	myotubularin related protein 4
hsa00562	Carbohydrate metabolism	Inositol phosphate metabolism - Homo sapiens (human)	MTMR8	myotubularin	myotubularin related protein 8
hsa00562	Carbohydrate metabolism	Inositol phosphate metabolism - Homo sapiens (human)	MTMR6	myotubularin	myotubularin related protein 6
hsa00562	Carbohydrate metabolism	Inositol phosphate metabolism - Homo sapiens (human)	MTMR7	myotubularin	myotubularin related protein 7
hsa00562	Carbohydrate metabolism	Inositol phosphate metabolism - Homo sapiens (human)	MTMR14	myotubularin	myotubularin related protein 14
hsa00562	Carbohydrate metabolism	Inositol phosphate metabolism - Homo sapiens (human)	PI4KA	phosphatidylinositol	phosphatidylinositol 4-kinase alpha
hsa00562	Carbohydrate metabolism	Inositol phosphate metabolism - Homo sapiens (human)	PI4KB	phosphatidylinositol	phosphatidylinositol 4-kinase beta
hsa00562	Carbohydrate metabolism	Inositol phosphate metabolism - Homo sapiens (human)	PI4K2A	phosphatidylinositol	phosphatidylinositol 4-kinase type 2 alpha
hsa00562	Carbohydrate metabolism	Inositol phosphate metabolism - Homo sapiens (human)	PI4K2B	phosphatidylinositol	phosphatidylinositol 4-kinase type 2 beta
hsa00562	Carbohydrate metabolism	Inositol phosphate metabolism - Homo sapiens (human)	SACM1L	SAC1	SAC1 like phosphatidylinositide phosphatase
hsa00562	Carbohydrate metabolism	Inositol phosphate metabolism - Homo sapiens (human)	INPP5F	inositol	inositol polyphosphate-5-phosphatase F
hsa00562	Carbohydrate metabolism	Inositol phosphate metabolism - Homo sapiens (human)	PIP5K1C	phosphatidylinositol-4-phosphate	phosphatidylinositol-4-phosphate 5-kinase type 1 gamma
hsa00562	Carbohydrate metabolism	Inositol phosphate metabolism - Homo sapiens (human)	PIP5K1A	phosphatidylinositol-4-phosphate	phosphatidylinositol-4-phosphate 5-kinase type 1 alpha
hsa00562	Carbohydrate metabolism	Inositol phosphate metabolism - Homo sapiens (human)	PIP5K1B	phosphatidylinositol-4-phosphate	phosphatidylinositol-4-phosphate 5-kinase type 1 beta
hsa00562	Carbohydrate metabolism	Inositol phosphate metabolism - Homo sapiens (human)	PIP5KL1	phosphatidylinositol-4-phosphate	phosphatidylinositol-4-phosphate 5-kinase like 1
hsa00562	Carbohydrate metabolism	Inositol phosphate metabolism - Homo sapiens (human)	OCRL	OCRL	OCRL inositol polyphosphate-5-phosphatase
hsa00562	Carbohydrate metabolism	Inositol phosphate metabolism - Homo sapiens (human)	INPP5B	inositol	inositol polyphosphate-5-phosphatase B
hsa00562	Carbohydrate metabolism	Inositol phosphate metabolism - Homo sapiens (human)	INPP5E	inositol	inositol polyphosphate-5-phosphatase E
hsa00562	Carbohydrate metabolism	Inositol phosphate metabolism - Homo sapiens (human)	SYNJ1	synaptojanin	synaptojanin 1
hsa00562	Carbohydrate metabolism	Inositol phosphate metabolism - Homo sapiens (human)	SYNJ2	synaptojanin	synaptojanin 2
hsa00562	Carbohydrate metabolism	Inositol phosphate metabolism - Homo sapiens (human)	PLCB1	phospholipase	phospholipase C beta 1
hsa00562	Carbohydrate metabolism	Inositol phosphate metabolism - Homo sapiens (human)	PLCB2	phospholipase	phospholipase C beta 2
hsa00562	Carbohydrate metabolism	Inositol phosphate metabolism - Homo sapiens (human)	PLCB3	phospholipase	phospholipase C beta 3
hsa00562	Carbohydrate metabolism	Inositol phosphate metabolism - Homo sapiens (human)	PLCB4	phospholipase	phospholipase C beta 4
hsa00562	Carbohydrate metabolism	Inositol phosphate metabolism - Homo sapiens (human)	PLCD1	phospholipase	phospholipase C delta 1
hsa00562	Carbohydrate metabolism	Inositol phosphate metabolism - Homo sapiens (human)	PLCD3	phospholipase	phospholipase C delta 3
hsa00562	Carbohydrate metabolism	Inositol phosphate metabolism - Homo sapiens (human)	PLCD4	phospholipase	phospholipase C delta 4
hsa00562	Carbohydrate metabolism	Inositol phosphate metabolism - Homo sapiens (human)	PLCE1	phospholipase	phospholipase C epsilon 1
hsa00562	Carbohydrate metabolism	Inositol phosphate metabolism - Homo sapiens (human)	PLCG1	phospholipase	phospholipase C gamma 1
hsa00562	Carbohydrate metabolism	Inositol phosphate metabolism - Homo sapiens (human)	PLCG2	phospholipase	phospholipase C gamma 2
hsa00562	Carbohydrate metabolism	Inositol phosphate metabolism - Homo sapiens (human)	PLCZ1	phospholipase	phospholipase C zeta 1
hsa00562	Carbohydrate metabolism	Inositol phosphate metabolism - Homo sapiens (human)	PLCH1	phospholipase	phospholipase C eta 1
hsa00562	Carbohydrate metabolism	Inositol phosphate metabolism - Homo sapiens (human)	PLCH2	phospholipase	phospholipase C eta 2
hsa00562	Carbohydrate metabolism	Inositol phosphate metabolism - Homo sapiens (human)	ITPKB	inositol-trisphosphate	inositol-trisphosphate 3-kinase B
hsa00562	Carbohydrate metabolism	Inositol phosphate metabolism - Homo sapiens (human)	ITPKA	inositol-trisphosphate	inositol-trisphosphate 3-kinase A
hsa00562	Carbohydrate metabolism	Inositol phosphate metabolism - Homo sapiens (human)	ITPKC	inositol-trisphosphate	inositol-trisphosphate 3-kinase C
hsa00562	Carbohydrate metabolism	Inositol phosphate metabolism - Homo sapiens (human)	MINPP1	multiple	multiple inositol-polyphosphate phosphatase 1
hsa00562	Carbohydrate metabolism	Inositol phosphate metabolism - Homo sapiens (human)	INPP5A	inositol	inositol polyphosphate-5-phosphatase A
hsa00562	Carbohydrate metabolism	Inositol phosphate metabolism - Homo sapiens (human)	INPP5K	inositol	inositol polyphosphate-5-phosphatase K
hsa00562	Carbohydrate metabolism	Inositol phosphate metabolism - Homo sapiens (human)	INPP5J	inositol	inositol polyphosphate-5-phosphatase J
hsa00562	Carbohydrate metabolism	Inositol phosphate metabolism - Homo sapiens (human)	INPP1	inositol	inositol polyphosphate-1-phosphatase
hsa00562	Carbohydrate metabolism	Inositol phosphate metabolism - Homo sapiens (human)	IMPA2	inositol	inositol monophosphatase 2
hsa00562	Carbohydrate metabolism	Inositol phosphate metabolism - Homo sapiens (human)	IMPA1	inositol	inositol monophosphatase 1
hsa00562	Carbohydrate metabolism	Inositol phosphate metabolism - Homo sapiens (human)	ITPK1	inositol-tetrakisphosphate	inositol-tetrakisphosphate 1-kinase
hsa00562	Carbohydrate metabolism	Inositol phosphate metabolism - Homo sapiens (human)	IPMK	inositol	inositol polyphosphate multikinase
hsa00562	Carbohydrate metabolism	Inositol phosphate metabolism - Homo sapiens (human)	IPPK	inositol-pentakisphosphate	inositol-pentakisphosphate 2-kinase
hsa00562	Carbohydrate metabolism	Inositol phosphate metabolism - Homo sapiens (human)	INPP4A	inositol	inositol polyphosphate-4-phosphatase type I A
hsa00562	Carbohydrate metabolism	Inositol phosphate metabolism - Homo sapiens (human)	INPP4B	inositol	inositol polyphosphate-4-phosphatase type II B
hsa00562	Carbohydrate metabolism	Inositol phosphate metabolism - Homo sapiens (human)	ISYNA1	inositol-3-phosphate	inositol-3-phosphate synthase 1
hsa00562	Carbohydrate metabolism	Inositol phosphate metabolism - Homo sapiens (human)	PIK3CA	phosphatidylinositol-4,5-bisphosphate	phosphatidylinositol-4,5-bisphosphate 3-kinase catalytic subunit alpha
hsa00562	Carbohydrate metabolism	Inositol phosphate metabolism - Homo sapiens (human)	PIK3CD	phosphatidylinositol-4,5-bisphosphate	phosphatidylinositol-4,5-bisphosphate 3-kinase catalytic subunit delta
hsa00562	Carbohydrate metabolism	Inositol phosphate metabolism - Homo sapiens (human)	PIK3CB	phosphatidylinositol-4,5-bisphosphate	phosphatidylinositol-4,5-bisphosphate 3-kinase catalytic subunit beta
hsa00562	Carbohydrate metabolism	Inositol phosphate metabolism - Homo sapiens (human)	PIK3CG	phosphatidylinositol-4,5-bisphosphate	phosphatidylinositol-4,5-bisphosphate 3-kinase catalytic subunit gamma
hsa00562	Carbohydrate metabolism	Inositol phosphate metabolism - Homo sapiens (human)	PTEN	phosphatase	phosphatase and tensin homolog
hsa00562	Carbohydrate metabolism	Inositol phosphate metabolism - Homo sapiens (human)	INPP5D	inositol	inositol polyphosphate-5-phosphatase D
hsa00562	Carbohydrate metabolism	Inositol phosphate metabolism - Homo sapiens (human)	INPPL1	inositol	inositol polyphosphate phosphatase like 1
hsa00562	Carbohydrate metabolism	Inositol phosphate metabolism - Homo sapiens (human)	PIK3C2G	phosphatidylinositol-4-phosphate	phosphatidylinositol-4-phosphate 3-kinase catalytic subunit type 2 gamma
hsa00562	Carbohydrate metabolism	Inositol phosphate metabolism - Homo sapiens (human)	PIK3C2A	phosphatidylinositol-4-phosphate	phosphatidylinositol-4-phosphate 3-kinase catalytic subunit type 2 alpha
hsa00562	Carbohydrate metabolism	Inositol phosphate metabolism - Homo sapiens (human)	PIK3C2B	phosphatidylinositol-4-phosphate	phosphatidylinositol-4-phosphate 3-kinase catalytic subunit type 2 beta
hsa00562	Carbohydrate metabolism	Inositol phosphate metabolism - Homo sapiens (human)	PIKFYVE	phosphoinositide	phosphoinositide kinase, FYVE-type zinc finger containing
hsa00562	Carbohydrate metabolism	Inositol phosphate metabolism - Homo sapiens (human)	FIG4	FIG4	FIG4 phosphoinositide 5-phosphatase
hsa00562	Carbohydrate metabolism	Inositol phosphate metabolism - Homo sapiens (human)	PIP4K2C	phosphatidylinositol-5-phosphate	phosphatidylinositol-5-phosphate 4-kinase type 2 gamma
hsa00562	Carbohydrate metabolism	Inositol phosphate metabolism - Homo sapiens (human)	PIP4K2A	phosphatidylinositol-5-phosphate	phosphatidylinositol-5-phosphate 4-kinase type 2 alpha
hsa00562	Carbohydrate metabolism	Inositol phosphate metabolism - Homo sapiens (human)	PIP4K2B	phosphatidylinositol-5-phosphate	phosphatidylinositol-5-phosphate 4-kinase type 2 beta
hsa00562	Carbohydrate metabolism	Inositol phosphate metabolism - Homo sapiens (human)	CDIPT	CDP-diacylglycerol--inositol	CDP-diacylglycerol--inositol 3-phosphatidyltransferase
hsa00562	Carbohydrate metabolism	Inositol phosphate metabolism - Homo sapiens (human)	MIOX	myo-inositol	myo-inositol oxygenase
hsa00562	Carbohydrate metabolism	Inositol phosphate metabolism - Homo sapiens (human)	ALDH6A1	aldehyde	aldehyde dehydrogenase 6 family member A1
hsa00562	Carbohydrate metabolism	Inositol phosphate metabolism - Homo sapiens (human)	TPI1	triosephosphate	triosephosphate isomerase 1
hsa00190	Energy metabolism	Oxidative phosphorylation - Homo sapiens (human)	TYSND1	NADH	NADH dehydrogenase subunit 1
hsa00190	Energy metabolism	Oxidative phosphorylation - Homo sapiens (human)	ALX4	NADH	NADH dehydrogenase subunit 2
hsa00190	Energy metabolism	Oxidative phosphorylation - Homo sapiens (human)	KCND3	NADH	NADH dehydrogenase subunit 3
hsa00190	Energy metabolism	Oxidative phosphorylation - Homo sapiens (human)	DENND4A	NADH	NADH dehydrogenase subunit 4
hsa00190	Energy metabolism	Oxidative phosphorylation - Homo sapiens (human)	MT-ND4L	NADH	NADH dehydrogenase subunit 4L
hsa00190	Energy metabolism	Oxidative phosphorylation - Homo sapiens (human)	DAND5	NADH	NADH dehydrogenase subunit 5
hsa00190	Energy metabolism	Oxidative phosphorylation - Homo sapiens (human)	FBXO38	NADH	NADH dehydrogenase subunit 6
hsa00190	Energy metabolism	Oxidative phosphorylation - Homo sapiens (human)	NDUFS1	NADH:ubiquinone	NADH:ubiquinone oxidoreductase core subunit S1
hsa00190	Energy metabolism	Oxidative phosphorylation - Homo sapiens (human)	NDUFS2	NADH:ubiquinone	NADH:ubiquinone oxidoreductase core subunit S2
hsa00190	Energy metabolism	Oxidative phosphorylation - Homo sapiens (human)	NDUFS3	NADH:ubiquinone	NADH:ubiquinone oxidoreductase core subunit S3
hsa00190	Energy metabolism	Oxidative phosphorylation - Homo sapiens (human)	NDUFS4	NADH:ubiquinone	NADH:ubiquinone oxidoreductase subunit S4
hsa00190	Energy metabolism	Oxidative phosphorylation - Homo sapiens (human)	NDUFS5	NADH:ubiquinone	NADH:ubiquinone oxidoreductase subunit S5
hsa00190	Energy metabolism	Oxidative phosphorylation - Homo sapiens (human)	NDUFS6	NADH:ubiquinone	NADH:ubiquinone oxidoreductase subunit S6
hsa00190	Energy metabolism	Oxidative phosphorylation - Homo sapiens (human)	NDUFS7	NADH:ubiquinone	NADH:ubiquinone oxidoreductase core subunit S7
hsa00190	Energy metabolism	Oxidative phosphorylation - Homo sapiens (human)	NDUFS8	NADH:ubiquinone	NADH:ubiquinone oxidoreductase core subunit S8
hsa00190	Energy metabolism	Oxidative phosphorylation - Homo sapiens (human)	NDUFV1	NADH:ubiquinone	NADH:ubiquinone oxidoreductase core subunit V1
hsa00190	Energy metabolism	Oxidative phosphorylation - Homo sapiens (human)	NDUFV2	NADH:ubiquinone	NADH:ubiquinone oxidoreductase core subunit V2
hsa00190	Energy metabolism	Oxidative phosphorylation - Homo sapiens (human)	NDUFV3	NADH:ubiquinone	NADH:ubiquinone oxidoreductase subunit V3
hsa00190	Energy metabolism	Oxidative phosphorylation - Homo sapiens (human)	NDUFA1	NADH:ubiquinone	NADH:ubiquinone oxidoreductase subunit A1
hsa00190	Energy metabolism	Oxidative phosphorylation - Homo sapiens (human)	NDUFA2	NADH:ubiquinone	NADH:ubiquinone oxidoreductase subunit A2
hsa00190	Energy metabolism	Oxidative phosphorylation - Homo sapiens (human)	NDUFA3	NADH:ubiquinone	NADH:ubiquinone oxidoreductase subunit A3
hsa00190	Energy metabolism	Oxidative phosphorylation - Homo sapiens (human)	NDUFA4	NDUFA4	NDUFA4 mitochondrial complex associated
hsa00190	Energy metabolism	Oxidative phosphorylation - Homo sapiens (human)	NDUFA4L2	NDUFA4	NDUFA4 mitochondrial complex associated like 2
hsa00190	Energy metabolism	Oxidative phosphorylation - Homo sapiens (human)	NDUFA5	NADH:ubiquinone	NADH:ubiquinone oxidoreductase subunit A5
hsa00190	Energy metabolism	Oxidative phosphorylation - Homo sapiens (human)	NDUFA6	NADH:ubiquinone	NADH:ubiquinone oxidoreductase subunit A6
hsa00190	Energy metabolism	Oxidative phosphorylation - Homo sapiens (human)	NDUFA7	NADH:ubiquinone	NADH:ubiquinone oxidoreductase subunit A7
hsa00190	Energy metabolism	Oxidative phosphorylation - Homo sapiens (human)	NDUFA8	NADH:ubiquinone	NADH:ubiquinone oxidoreductase subunit A8
hsa00190	Energy metabolism	Oxidative phosphorylation - Homo sapiens (human)	NDUFA9	NADH:ubiquinone	NADH:ubiquinone oxidoreductase subunit A9
hsa00190	Energy metabolism	Oxidative phosphorylation - Homo sapiens (human)	NDUFA10	NADH:ubiquinone	NADH:ubiquinone oxidoreductase subunit A10
hsa00190	Energy metabolism	Oxidative phosphorylation - Homo sapiens (human)	NDUFAB1	NADH:ubiquinone	NADH:ubiquinone oxidoreductase subunit AB1
hsa00190	Energy metabolism	Oxidative phosphorylation - Homo sapiens (human)	NDUFA11	NADH:ubiquinone	NADH:ubiquinone oxidoreductase subunit A11
hsa00190	Energy metabolism	Oxidative phosphorylation - Homo sapiens (human)	NDUFA12	NADH:ubiquinone	NADH:ubiquinone oxidoreductase subunit A12
hsa00190	Energy metabolism	Oxidative phosphorylation - Homo sapiens (human)	NDUFA13	NADH:ubiquinone	NADH:ubiquinone oxidoreductase subunit A13
hsa00190	Energy metabolism	Oxidative phosphorylation - Homo sapiens (human)	NDUFB1	NADH:ubiquinone	NADH:ubiquinone oxidoreductase subunit B1
hsa00190	Energy metabolism	Oxidative phosphorylation - Homo sapiens (human)	NDUFB2	NADH:ubiquinone	NADH:ubiquinone oxidoreductase subunit B2
hsa00190	Energy metabolism	Oxidative phosphorylation - Homo sapiens (human)	NDUFB3	NADH:ubiquinone	NADH:ubiquinone oxidoreductase subunit B3
hsa00190	Energy metabolism	Oxidative phosphorylation - Homo sapiens (human)	NDUFB4	NADH:ubiquinone	NADH:ubiquinone oxidoreductase subunit B4
hsa00190	Energy metabolism	Oxidative phosphorylation - Homo sapiens (human)	NDUFB5	NADH:ubiquinone	NADH:ubiquinone oxidoreductase subunit B5
hsa00190	Energy metabolism	Oxidative phosphorylation - Homo sapiens (human)	NDUFB6	NADH:ubiquinone	NADH:ubiquinone oxidoreductase subunit B6
hsa00190	Energy metabolism	Oxidative phosphorylation - Homo sapiens (human)	NDUFB7	NADH:ubiquinone	NADH:ubiquinone oxidoreductase subunit B7
hsa00190	Energy metabolism	Oxidative phosphorylation - Homo sapiens (human)	NDUFB8	NADH:ubiquinone	NADH:ubiquinone oxidoreductase subunit B8
hsa00190	Energy metabolism	Oxidative phosphorylation - Homo sapiens (human)	NDUFB9	NADH:ubiquinone	NADH:ubiquinone oxidoreductase subunit B9
hsa00190	Energy metabolism	Oxidative phosphorylation - Homo sapiens (human)	NDUFB10	NADH:ubiquinone	NADH:ubiquinone oxidoreductase subunit B10
hsa00190	Energy metabolism	Oxidative phosphorylation - Homo sapiens (human)	NDUFB11	NADH:ubiquinone	NADH:ubiquinone oxidoreductase subunit B11
hsa00190	Energy metabolism	Oxidative phosphorylation - Homo sapiens (human)	NDUFC1	NADH:ubiquinone	NADH:ubiquinone oxidoreductase subunit C1
hsa00190	Energy metabolism	Oxidative phosphorylation - Homo sapiens (human)	NDUFC2	NADH:ubiquinone	NADH:ubiquinone oxidoreductase subunit C2
hsa00190	Energy metabolism	Oxidative phosphorylation - Homo sapiens (human)	NDUFC2-KCTD14	NDUFC2-KCTD14	NDUFC2-KCTD14 readthrough
hsa00190	Energy metabolism	Oxidative phosphorylation - Homo sapiens (human)	SDHA	succinate	succinate dehydrogenase complex flavoprotein subunit A
hsa00190	Energy metabolism	Oxidative phosphorylation - Homo sapiens (human)	SDHB	succinate	succinate dehydrogenase complex iron sulfur subunit B
hsa00190	Energy metabolism	Oxidative phosphorylation - Homo sapiens (human)	SDHC	succinate	succinate dehydrogenase complex subunit C
hsa00190	Energy metabolism	Oxidative phosphorylation - Homo sapiens (human)	SDHD	succinate	succinate dehydrogenase complex subunit D
hsa00190	Energy metabolism	Oxidative phosphorylation - Homo sapiens (human)	UQCRFS1	ubiquinol-cytochrome	ubiquinol-cytochrome c reductase, Rieske iron-sulfur polypeptide 1
hsa00190	Energy metabolism	Oxidative phosphorylation - Homo sapiens (human)	CYB561D2	cytochrome	cytochrome b
hsa00190	Energy metabolism	Oxidative phosphorylation - Homo sapiens (human)	CYC1	cytochrome	cytochrome c1
hsa00190	Energy metabolism	Oxidative phosphorylation - Homo sapiens (human)	UQCRC1	ubiquinol-cytochrome	ubiquinol-cytochrome c reductase core protein 1
hsa00190	Energy metabolism	Oxidative phosphorylation - Homo sapiens (human)	UQCRC2	ubiquinol-cytochrome	ubiquinol-cytochrome c reductase core protein 2
hsa00190	Energy metabolism	Oxidative phosphorylation - Homo sapiens (human)	UQCRH	ubiquinol-cytochrome	ubiquinol-cytochrome c reductase hinge protein
hsa00190	Energy metabolism	Oxidative phosphorylation - Homo sapiens (human)	UQCRHL	ubiquinol-cytochrome	ubiquinol-cytochrome c reductase hinge protein like
hsa00190	Energy metabolism	Oxidative phosphorylation - Homo sapiens (human)	UQCRB	ubiquinol-cytochrome	ubiquinol-cytochrome c reductase binding protein
hsa00190	Energy metabolism	Oxidative phosphorylation - Homo sapiens (human)	UQCRQ	ubiquinol-cytochrome	ubiquinol-cytochrome c reductase complex III subunit VII
hsa00190	Energy metabolism	Oxidative phosphorylation - Homo sapiens (human)	UQCR10	ubiquinol-cytochrome	ubiquinol-cytochrome c reductase, complex III subunit X
hsa00190	Energy metabolism	Oxidative phosphorylation - Homo sapiens (human)	UQCR11	ubiquinol-cytochrome	ubiquinol-cytochrome c reductase, complex III subunit XI
hsa00190	Energy metabolism	Oxidative phosphorylation - Homo sapiens (human)	COX10	cytochrome	cytochrome c oxidase assembly factor heme A:farnesyltransferase COX10
hsa00190	Energy metabolism	Oxidative phosphorylation - Homo sapiens (human)	COA5	cytochrome	cytochrome c oxidase subunit III
hsa00190	Energy metabolism	Oxidative phosphorylation - Homo sapiens (human)	SYNJ2BP-COX16	cytochrome	cytochrome c oxidase subunit I
hsa00190	Energy metabolism	Oxidative phosphorylation - Homo sapiens (human)	COA3	cytochrome	cytochrome c oxidase subunit II
hsa00190	Energy metabolism	Oxidative phosphorylation - Homo sapiens (human)	COX4I2	cytochrome	cytochrome c oxidase subunit 4I2
hsa00190	Energy metabolism	Oxidative phosphorylation - Homo sapiens (human)	COX4I1	cytochrome	cytochrome c oxidase subunit 4I1
hsa00190	Energy metabolism	Oxidative phosphorylation - Homo sapiens (human)	COX5A	cytochrome	cytochrome c oxidase subunit 5A
hsa00190	Energy metabolism	Oxidative phosphorylation - Homo sapiens (human)	COX5B	cytochrome	cytochrome c oxidase subunit 5B
hsa00190	Energy metabolism	Oxidative phosphorylation - Homo sapiens (human)	COX6A1	cytochrome	cytochrome c oxidase subunit 6A1
hsa00190	Energy metabolism	Oxidative phosphorylation - Homo sapiens (human)	COX6A2	cytochrome	cytochrome c oxidase subunit 6A2
hsa00190	Energy metabolism	Oxidative phosphorylation - Homo sapiens (human)	COX6B1	cytochrome	cytochrome c oxidase subunit 6B1
hsa00190	Energy metabolism	Oxidative phosphorylation - Homo sapiens (human)	COX6B2	cytochrome	cytochrome c oxidase subunit 6B2
hsa00190	Energy metabolism	Oxidative phosphorylation - Homo sapiens (human)	COX6C	cytochrome	cytochrome c oxidase subunit 6C
hsa00190	Energy metabolism	Oxidative phosphorylation - Homo sapiens (human)	COX7A1	cytochrome	cytochrome c oxidase subunit 7A1
hsa00190	Energy metabolism	Oxidative phosphorylation - Homo sapiens (human)	COX7A2	cytochrome	cytochrome c oxidase subunit 7A2
hsa00190	Energy metabolism	Oxidative phosphorylation - Homo sapiens (human)	COX7A2L	cytochrome	cytochrome c oxidase subunit 7A2 like
hsa00190	Energy metabolism	Oxidative phosphorylation - Homo sapiens (human)	COX7B	cytochrome	cytochrome c oxidase subunit 7B
hsa00190	Energy metabolism	Oxidative phosphorylation - Homo sapiens (human)	COX7B2	cytochrome	cytochrome c oxidase subunit 7B2
hsa00190	Energy metabolism	Oxidative phosphorylation - Homo sapiens (human)	COX7C	cytochrome	cytochrome c oxidase subunit 7C
hsa00190	Energy metabolism	Oxidative phosphorylation - Homo sapiens (human)	COX8C	cytochrome	cytochrome c oxidase subunit 8C
hsa00190	Energy metabolism	Oxidative phosphorylation - Homo sapiens (human)	COX8A	cytochrome	cytochrome c oxidase subunit 8A
hsa00190	Energy metabolism	Oxidative phosphorylation - Homo sapiens (human)	COX11	cytochrome	cytochrome c oxidase copper chaperone COX11
hsa00190	Energy metabolism	Oxidative phosphorylation - Homo sapiens (human)	COX15	cytochrome	cytochrome c oxidase assembly homolog COX15
hsa00190	Energy metabolism	Oxidative phosphorylation - Homo sapiens (human)	COX17	cytochrome	cytochrome c oxidase copper chaperone COX17
hsa00190	Energy metabolism	Oxidative phosphorylation - Homo sapiens (human)	CYCS	cytochrome	cytochrome c, somatic
hsa00190	Energy metabolism	Oxidative phosphorylation - Homo sapiens (human)	ATP5A1	ATP	ATP synthase F1 subunit alpha
hsa00190	Energy metabolism	Oxidative phosphorylation - Homo sapiens (human)	ATP5B	ATP	ATP synthase F1 subunit beta
hsa00190	Energy metabolism	Oxidative phosphorylation - Homo sapiens (human)	ATP5C1	ATP	ATP synthase F1 subunit gamma
hsa00190	Energy metabolism	Oxidative phosphorylation - Homo sapiens (human)	ATP5D	ATP	ATP synthase F1 subunit delta
hsa00190	Energy metabolism	Oxidative phosphorylation - Homo sapiens (human)	ATP5E	ATP	ATP synthase F1 subunit epsilon
hsa00190	Energy metabolism	Oxidative phosphorylation - Homo sapiens (human)	ATP5O	ATP	ATP synthase peripheral stalk subunit OSCP
hsa00190	Energy metabolism	Oxidative phosphorylation - Homo sapiens (human)	MT-ATP6	ATP	ATP synthase F0 subunit 6
hsa00190	Energy metabolism	Oxidative phosphorylation - Homo sapiens (human)	ATP5F1	ATP	ATP synthase peripheral stalk-membrane subunit b
hsa00190	Energy metabolism	Oxidative phosphorylation - Homo sapiens (human)	ATP5G1	ATP	ATP synthase membrane subunit c locus 1
hsa00190	Energy metabolism	Oxidative phosphorylation - Homo sapiens (human)	ATP5G2	ATP	ATP synthase membrane subunit c locus 2
hsa00190	Energy metabolism	Oxidative phosphorylation - Homo sapiens (human)	ATP5G3	ATP	ATP synthase membrane subunit c locus 3
hsa00190	Energy metabolism	Oxidative phosphorylation - Homo sapiens (human)	ATP5H	ATP	ATP synthase peripheral stalk subunit d
hsa00190	Energy metabolism	Oxidative phosphorylation - Homo sapiens (human)	ATP5I	ATP	ATP synthase membrane subunit e
hsa00190	Energy metabolism	Oxidative phosphorylation - Homo sapiens (human)	ATP5J2-PTCD1	ATP	ATP synthase membrane subunit f
hsa00190	Energy metabolism	Oxidative phosphorylation - Homo sapiens (human)	ATP5L2	ATP	ATP synthase membrane subunit g
hsa00190	Energy metabolism	Oxidative phosphorylation - Homo sapiens (human)	ATP5L2	ATP	ATP synthase membrane subunit g like
hsa00190	Energy metabolism	Oxidative phosphorylation - Homo sapiens (human)	ATP5J	ATP	ATP synthase peripheral stalk subunit F6
hsa00190	Energy metabolism	Oxidative phosphorylation - Homo sapiens (human)	ATP8A1	ATP	ATP synthase F0 subunit 8
hsa00190	Energy metabolism	Oxidative phosphorylation - Homo sapiens (human)	ATP6V1A	ATPase	ATPase H+ transporting V1 subunit A
hsa00190	Energy metabolism	Oxidative phosphorylation - Homo sapiens (human)	ATP6V1B1	ATPase	ATPase H+ transporting V1 subunit B1
hsa00190	Energy metabolism	Oxidative phosphorylation - Homo sapiens (human)	ATP6V1B2	ATPase	ATPase H+ transporting V1 subunit B2
hsa00190	Energy metabolism	Oxidative phosphorylation - Homo sapiens (human)	ATP6V1C2	ATPase	ATPase H+ transporting V1 subunit C2
hsa00190	Energy metabolism	Oxidative phosphorylation - Homo sapiens (human)	ATP6V1C1	ATPase	ATPase H+ transporting V1 subunit C1
hsa00190	Energy metabolism	Oxidative phosphorylation - Homo sapiens (human)	ATP6V1D	ATPase	ATPase H+ transporting V1 subunit D
hsa00190	Energy metabolism	Oxidative phosphorylation - Homo sapiens (human)	ATP6V1E2	ATPase	ATPase H+ transporting V1 subunit E2
hsa00190	Energy metabolism	Oxidative phosphorylation - Homo sapiens (human)	ATP6V1E1	ATPase	ATPase H+ transporting V1 subunit E1
hsa00190	Energy metabolism	Oxidative phosphorylation - Homo sapiens (human)	ATP6V1F	ATPase	ATPase H+ transporting V1 subunit F
hsa00190	Energy metabolism	Oxidative phosphorylation - Homo sapiens (human)	ATP6V1FP2	V-type	V-type proton ATPase subunit F-like
hsa00190	Energy metabolism	Oxidative phosphorylation - Homo sapiens (human)	ATP6V1G1	ATPase	ATPase H+ transporting V1 subunit G1
hsa00190	Energy metabolism	Oxidative phosphorylation - Homo sapiens (human)	ATP6V1G3	ATPase	ATPase H+ transporting V1 subunit G3
hsa00190	Energy metabolism	Oxidative phosphorylation - Homo sapiens (human)	ATP6V1G2	ATPase	ATPase H+ transporting V1 subunit G2
hsa00190	Energy metabolism	Oxidative phosphorylation - Homo sapiens (human)	ATP6V1H	ATPase	ATPase H+ transporting V1 subunit H
hsa00190	Energy metabolism	Oxidative phosphorylation - Homo sapiens (human)	TCIRG1	T	T cell immune regulator 1, ATPase H+ transporting V0 subunit a3
hsa00190	Energy metabolism	Oxidative phosphorylation - Homo sapiens (human)	ATP6V0A2	ATPase	ATPase H+ transporting V0 subunit a2
hsa00190	Energy metabolism	Oxidative phosphorylation - Homo sapiens (human)	ATP6V0A4	ATPase	ATPase H+ transporting V0 subunit a4
hsa00190	Energy metabolism	Oxidative phosphorylation - Homo sapiens (human)	ATP6V0A1	ATPase	ATPase H+ transporting V0 subunit a1
hsa00190	Energy metabolism	Oxidative phosphorylation - Homo sapiens (human)	ATP6V0C	ATPase	ATPase H+ transporting V0 subunit c
hsa00190	Energy metabolism	Oxidative phosphorylation - Homo sapiens (human)	ATP6V0B	ATPase	ATPase H+ transporting V0 subunit b
hsa00190	Energy metabolism	Oxidative phosphorylation - Homo sapiens (human)	ATP6V0D1	ATPase	ATPase H+ transporting V0 subunit d1
hsa00190	Energy metabolism	Oxidative phosphorylation - Homo sapiens (human)	ATP6V0D2	ATPase	ATPase H+ transporting V0 subunit d2
hsa00190	Energy metabolism	Oxidative phosphorylation - Homo sapiens (human)	ATP6V0E1	ATPase	ATPase H+ transporting V0 subunit e1
hsa00190	Energy metabolism	Oxidative phosphorylation - Homo sapiens (human)	ATP6V0E2	ATPase	ATPase H+ transporting V0 subunit e2
hsa00190	Energy metabolism	Oxidative phosphorylation - Homo sapiens (human)	ATP6AP1	ATPase	ATPase H+ transporting accessory protein 1
hsa00190	Energy metabolism	Oxidative phosphorylation - Homo sapiens (human)	ATP4A	ATPase	ATPase H+/K+ transporting subunit alpha
hsa00190	Energy metabolism	Oxidative phosphorylation - Homo sapiens (human)	ATP4B	ATPase	ATPase H+/K+ transporting subunit beta
hsa00190	Energy metabolism	Oxidative phosphorylation - Homo sapiens (human)	ATP12A	ATPase	ATPase H+/K+ transporting non-gastric alpha2 subunit
hsa00190	Energy metabolism	Oxidative phosphorylation - Homo sapiens (human)	PPA2	inorganic	inorganic pyrophosphatase 2
hsa00190	Energy metabolism	Oxidative phosphorylation - Homo sapiens (human)	PPA1	inorganic	inorganic pyrophosphatase 1
hsa00190	Energy metabolism	Oxidative phosphorylation - Homo sapiens (human)	LHPP	phospholysine	phospholysine phosphohistidine inorganic pyrophosphate phosphatase
hsa00910	Energy metabolism	Nitrogen metabolism - Homo sapiens (human)	GLUD2	glutamate	glutamate dehydrogenase 2
hsa00910	Energy metabolism	Nitrogen metabolism - Homo sapiens (human)	GLUD1	glutamate	glutamate dehydrogenase 1
hsa00910	Energy metabolism	Nitrogen metabolism - Homo sapiens (human)	GLUL	glutamate-ammonia	glutamate-ammonia ligase
hsa00910	Energy metabolism	Nitrogen metabolism - Homo sapiens (human)	CPS1	carbamoyl-phosphate	carbamoyl-phosphate synthase 1
hsa00910	Energy metabolism	Nitrogen metabolism - Homo sapiens (human)	CA13	carbonic	carbonic anhydrase 13
hsa00910	Energy metabolism	Nitrogen metabolism - Homo sapiens (human)	CA1	carbonic	carbonic anhydrase 1
hsa00910	Energy metabolism	Nitrogen metabolism - Homo sapiens (human)	CA6	carbonic	carbonic anhydrase 6
hsa00910	Energy metabolism	Nitrogen metabolism - Homo sapiens (human)	CA7	carbonic	carbonic anhydrase 7
hsa00910	Energy metabolism	Nitrogen metabolism - Homo sapiens (human)	CA12	carbonic	carbonic anhydrase 12
hsa00910	Energy metabolism	Nitrogen metabolism - Homo sapiens (human)	CA5B	carbonic	carbonic anhydrase 5B
hsa00910	Energy metabolism	Nitrogen metabolism - Homo sapiens (human)	CA14	carbonic	carbonic anhydrase 14
hsa00910	Energy metabolism	Nitrogen metabolism - Homo sapiens (human)	CA9	carbonic	carbonic anhydrase 9
hsa00910	Energy metabolism	Nitrogen metabolism - Homo sapiens (human)	CA3	carbonic	carbonic anhydrase 3
hsa00910	Energy metabolism	Nitrogen metabolism - Homo sapiens (human)	CA5A	carbonic	carbonic anhydrase 5A
hsa00910	Energy metabolism	Nitrogen metabolism - Homo sapiens (human)	CA8	carbonic	carbonic anhydrase 8
hsa00910	Energy metabolism	Nitrogen metabolism - Homo sapiens (human)	CA2	carbonic	carbonic anhydrase 2
hsa00910	Energy metabolism	Nitrogen metabolism - Homo sapiens (human)	CA4	carbonic	carbonic anhydrase 4
hsa00920	Energy metabolism	Sulfur metabolism - Homo sapiens (human)	PAPSS2	3'-phosphoadenosine	3'-phosphoadenosine 5'-phosphosulfate synthase 2
hsa00920	Energy metabolism	Sulfur metabolism - Homo sapiens (human)	PAPSS1	3'-phosphoadenosine	3'-phosphoadenosine 5'-phosphosulfate synthase 1
hsa00920	Energy metabolism	Sulfur metabolism - Homo sapiens (human)	BPNT1	3'(2'),	3'(2'), 5'-bisphosphate nucleotidase 1
hsa00920	Energy metabolism	Sulfur metabolism - Homo sapiens (human)	IMPAD1	3'(2'),	3'(2'), 5'-bisphosphate nucleotidase 2
hsa00920	Energy metabolism	Sulfur metabolism - Homo sapiens (human)	SUOX	sulfite	sulfite oxidase
hsa00920	Energy metabolism	Sulfur metabolism - Homo sapiens (human)	SQRDL	sulfide	sulfide quinone oxidoreductase
hsa00920	Energy metabolism	Sulfur metabolism - Homo sapiens (human)	ETHE1	ETHE1	ETHE1 persulfide dioxygenase
hsa00920	Energy metabolism	Sulfur metabolism - Homo sapiens (human)	MPST	mercaptopyruvate	mercaptopyruvate sulfurtransferase
hsa00920	Energy metabolism	Sulfur metabolism - Homo sapiens (human)	TST	thiosulfate	thiosulfate sulfurtransferase
hsa00920	Energy metabolism	Sulfur metabolism - Homo sapiens (human)	SELENBP1	selenium	selenium binding protein 1
hsa00061	Lipid metabolism	Fatty acid biosynthesis - Homo sapiens (human)	ACACA	acetyl-CoA	acetyl-CoA carboxylase alpha
hsa00061	Lipid metabolism	Fatty acid biosynthesis - Homo sapiens (human)	ACACB	acetyl-CoA	acetyl-CoA carboxylase beta
hsa00061	Lipid metabolism	Fatty acid biosynthesis - Homo sapiens (human)	ACSF3	acyl-CoA	acyl-CoA synthetase family member 3
hsa00061	Lipid metabolism	Fatty acid biosynthesis - Homo sapiens (human)	MCAT	malonyl-CoA-acyl	malonyl-CoA-acyl carrier protein transacylase
hsa00061	Lipid metabolism	Fatty acid biosynthesis - Homo sapiens (human)	FASN	fatty	fatty acid synthase
hsa00061	Lipid metabolism	Fatty acid biosynthesis - Homo sapiens (human)	OXSM	3-oxoacyl-ACP	3-oxoacyl-ACP synthase, mitochondrial
hsa00061	Lipid metabolism	Fatty acid biosynthesis - Homo sapiens (human)	CBR4	carbonyl	carbonyl reductase 4
hsa00061	Lipid metabolism	Fatty acid biosynthesis - Homo sapiens (human)	HSD17B8	hydroxysteroid	hydroxysteroid 17-beta dehydrogenase 8
hsa00061	Lipid metabolism	Fatty acid biosynthesis - Homo sapiens (human)	HTD2	hydroxyacyl-thioester	hydroxyacyl-thioester dehydratase type 2
hsa00061	Lipid metabolism	Fatty acid biosynthesis - Homo sapiens (human)	MECR	mitochondrial	mitochondrial trans-2-enoyl-CoA reductase
hsa00061	Lipid metabolism	Fatty acid biosynthesis - Homo sapiens (human)	OLAH	oleoyl-ACP	oleoyl-ACP hydrolase
hsa00061	Lipid metabolism	Fatty acid biosynthesis - Homo sapiens (human)	ACSL6	acyl-CoA	acyl-CoA synthetase long chain family member 6
hsa00061	Lipid metabolism	Fatty acid biosynthesis - Homo sapiens (human)	ACSL4	acyl-CoA	acyl-CoA synthetase long chain family member 4
hsa00061	Lipid metabolism	Fatty acid biosynthesis - Homo sapiens (human)	ACSL1	acyl-CoA	acyl-CoA synthetase long chain family member 1
hsa00061	Lipid metabolism	Fatty acid biosynthesis - Homo sapiens (human)	ACSL5	acyl-CoA	acyl-CoA synthetase long chain family member 5
hsa00061	Lipid metabolism	Fatty acid biosynthesis - Homo sapiens (human)	ACSL3	acyl-CoA	acyl-CoA synthetase long chain family member 3
hsa00061	Lipid metabolism	Fatty acid biosynthesis - Homo sapiens (human)	ACSBG1	acyl-CoA	acyl-CoA synthetase bubblegum family member 1
hsa00061	Lipid metabolism	Fatty acid biosynthesis - Homo sapiens (human)	ACSBG2	acyl-CoA	acyl-CoA synthetase bubblegum family member 2
hsa00062	Lipid metabolism	Fatty acid elongation - Homo sapiens (human)	ACAA2	acetyl-CoA	acetyl-CoA acyltransferase 2
hsa00062	Lipid metabolism	Fatty acid elongation - Homo sapiens (human)	HADHB	hydroxyacyl-CoA	hydroxyacyl-CoA dehydrogenase trifunctional multienzyme complex subunit beta
hsa00062	Lipid metabolism	Fatty acid elongation - Homo sapiens (human)	HADH	hydroxyacyl-CoA	hydroxyacyl-CoA dehydrogenase
hsa00062	Lipid metabolism	Fatty acid elongation - Homo sapiens (human)	HADHA	hydroxyacyl-CoA	hydroxyacyl-CoA dehydrogenase trifunctional multienzyme complex subunit alpha
hsa00062	Lipid metabolism	Fatty acid elongation - Homo sapiens (human)	ECHS1	enoyl-CoA	enoyl-CoA hydratase, short chain 1
hsa00062	Lipid metabolism	Fatty acid elongation - Homo sapiens (human)	MECR	mitochondrial	mitochondrial trans-2-enoyl-CoA reductase
hsa00062	Lipid metabolism	Fatty acid elongation - Homo sapiens (human)	PPT1	palmitoyl-protein	palmitoyl-protein thioesterase 1
hsa00062	Lipid metabolism	Fatty acid elongation - Homo sapiens (human)	PPT2	palmitoyl-protein	palmitoyl-protein thioesterase 2
hsa00062	Lipid metabolism	Fatty acid elongation - Homo sapiens (human)	ELOVL1	ELOVL	ELOVL fatty acid elongase 1
hsa00062	Lipid metabolism	Fatty acid elongation - Homo sapiens (human)	ELOVL2	ELOVL	ELOVL fatty acid elongase 2
hsa00062	Lipid metabolism	Fatty acid elongation - Homo sapiens (human)	ELOVL3	ELOVL	ELOVL fatty acid elongase 3
hsa00062	Lipid metabolism	Fatty acid elongation - Homo sapiens (human)	ELOVL4	ELOVL	ELOVL fatty acid elongase 4
hsa00062	Lipid metabolism	Fatty acid elongation - Homo sapiens (human)	ELOVL5	ELOVL	ELOVL fatty acid elongase 5
hsa00062	Lipid metabolism	Fatty acid elongation - Homo sapiens (human)	ELOVL6	ELOVL	ELOVL fatty acid elongase 6
hsa00062	Lipid metabolism	Fatty acid elongation - Homo sapiens (human)	ELOVL7	ELOVL	ELOVL fatty acid elongase 7
hsa00062	Lipid metabolism	Fatty acid elongation - Homo sapiens (human)	HSD17B12	hydroxysteroid	hydroxysteroid 17-beta dehydrogenase 12
hsa00062	Lipid metabolism	Fatty acid elongation - Homo sapiens (human)	HACD2	3-hydroxyacyl-CoA	3-hydroxyacyl-CoA dehydratase 2
hsa00062	Lipid metabolism	Fatty acid elongation - Homo sapiens (human)	HACD1	3-hydroxyacyl-CoA	3-hydroxyacyl-CoA dehydratase 1
hsa00062	Lipid metabolism	Fatty acid elongation - Homo sapiens (human)	HACD4	3-hydroxyacyl-CoA	3-hydroxyacyl-CoA dehydratase 4
hsa00062	Lipid metabolism	Fatty acid elongation - Homo sapiens (human)	HACD3	3-hydroxyacyl-CoA	3-hydroxyacyl-CoA dehydratase 3
hsa00062	Lipid metabolism	Fatty acid elongation - Homo sapiens (human)	TECR	trans-2,3-enoyl-CoA	trans-2,3-enoyl-CoA reductase
hsa00062	Lipid metabolism	Fatty acid elongation - Homo sapiens (human)	ACOT4	acyl-CoA	acyl-CoA thioesterase 4
hsa00062	Lipid metabolism	Fatty acid elongation - Homo sapiens (human)	ACOT2	acyl-CoA	acyl-CoA thioesterase 2
hsa00062	Lipid metabolism	Fatty acid elongation - Homo sapiens (human)	ACOT1	acyl-CoA	acyl-CoA thioesterase 1
hsa00062	Lipid metabolism	Fatty acid elongation - Homo sapiens (human)	ACOT7	acyl-CoA	acyl-CoA thioesterase 7
hsa00062	Lipid metabolism	Fatty acid elongation - Homo sapiens (human)	THEM4	thioesterase	thioesterase superfamily member 4
hsa00062	Lipid metabolism	Fatty acid elongation - Homo sapiens (human)	THEM5	thioesterase	thioesterase superfamily member 5
hsa00071	Lipid metabolism	Fatty acid degradation - Homo sapiens (human)	ACAT2	acetyl-CoA	acetyl-CoA acetyltransferase 2
hsa00071	Lipid metabolism	Fatty acid degradation - Homo sapiens (human)	ACAT1	acetyl-CoA	acetyl-CoA acetyltransferase 1
hsa00071	Lipid metabolism	Fatty acid degradation - Homo sapiens (human)	ACAA1	acetyl-CoA	acetyl-CoA acyltransferase 1
hsa00071	Lipid metabolism	Fatty acid degradation - Homo sapiens (human)	ACAA2	acetyl-CoA	acetyl-CoA acyltransferase 2
hsa00071	Lipid metabolism	Fatty acid degradation - Homo sapiens (human)	HADHB	hydroxyacyl-CoA	hydroxyacyl-CoA dehydrogenase trifunctional multienzyme complex subunit beta
hsa00071	Lipid metabolism	Fatty acid degradation - Homo sapiens (human)	HADH	hydroxyacyl-CoA	hydroxyacyl-CoA dehydrogenase
hsa00071	Lipid metabolism	Fatty acid degradation - Homo sapiens (human)	HADHA	hydroxyacyl-CoA	hydroxyacyl-CoA dehydrogenase trifunctional multienzyme complex subunit alpha
hsa00071	Lipid metabolism	Fatty acid degradation - Homo sapiens (human)	EHHADH	enoyl-CoA	enoyl-CoA hydratase and 3-hydroxyacyl CoA dehydrogenase
hsa00071	Lipid metabolism	Fatty acid degradation - Homo sapiens (human)	ECHS1	enoyl-CoA	enoyl-CoA hydratase, short chain 1
hsa00071	Lipid metabolism	Fatty acid degradation - Homo sapiens (human)	ACOX3	acyl-CoA	acyl-CoA oxidase 3, pristanoyl
hsa00071	Lipid metabolism	Fatty acid degradation - Homo sapiens (human)	ACOX1	acyl-CoA	acyl-CoA oxidase 1
hsa00071	Lipid metabolism	Fatty acid degradation - Homo sapiens (human)	ACADS	acyl-CoA	acyl-CoA dehydrogenase short chain
hsa00071	Lipid metabolism	Fatty acid degradation - Homo sapiens (human)	ACADM	acyl-CoA	acyl-CoA dehydrogenase medium chain
hsa00071	Lipid metabolism	Fatty acid degradation - Homo sapiens (human)	ACADL	acyl-CoA	acyl-CoA dehydrogenase long chain
hsa00071	Lipid metabolism	Fatty acid degradation - Homo sapiens (human)	ACADSB	acyl-CoA	acyl-CoA dehydrogenase short/branched chain
hsa00071	Lipid metabolism	Fatty acid degradation - Homo sapiens (human)	ACADVL	acyl-CoA	acyl-CoA dehydrogenase very long chain
hsa00071	Lipid metabolism	Fatty acid degradation - Homo sapiens (human)	GCDH	glutaryl-CoA	glutaryl-CoA dehydrogenase
hsa00071	Lipid metabolism	Fatty acid degradation - Homo sapiens (human)	ACSL6	acyl-CoA	acyl-CoA synthetase long chain family member 6
hsa00071	Lipid metabolism	Fatty acid degradation - Homo sapiens (human)	ACSL4	acyl-CoA	acyl-CoA synthetase long chain family member 4
hsa00071	Lipid metabolism	Fatty acid degradation - Homo sapiens (human)	ACSL1	acyl-CoA	acyl-CoA synthetase long chain family member 1
hsa00071	Lipid metabolism	Fatty acid degradation - Homo sapiens (human)	ACSL5	acyl-CoA	acyl-CoA synthetase long chain family member 5
hsa00071	Lipid metabolism	Fatty acid degradation - Homo sapiens (human)	ACSL3	acyl-CoA	acyl-CoA synthetase long chain family member 3
hsa00071	Lipid metabolism	Fatty acid degradation - Homo sapiens (human)	ACSBG1	acyl-CoA	acyl-CoA synthetase bubblegum family member 1
hsa00071	Lipid metabolism	Fatty acid degradation - Homo sapiens (human)	ACSBG2	acyl-CoA	acyl-CoA synthetase bubblegum family member 2
hsa00071	Lipid metabolism	Fatty acid degradation - Homo sapiens (human)	CPT1A	carnitine	carnitine palmitoyltransferase 1A
hsa00071	Lipid metabolism	Fatty acid degradation - Homo sapiens (human)	CPT1B	carnitine	carnitine palmitoyltransferase 1B
hsa00071	Lipid metabolism	Fatty acid degradation - Homo sapiens (human)	CPT1C	carnitine	carnitine palmitoyltransferase 1C
hsa00071	Lipid metabolism	Fatty acid degradation - Homo sapiens (human)	CPT2	carnitine	carnitine palmitoyltransferase 2
hsa00071	Lipid metabolism	Fatty acid degradation - Homo sapiens (human)	ECI1	enoyl-CoA	enoyl-CoA delta isomerase 1
hsa00071	Lipid metabolism	Fatty acid degradation - Homo sapiens (human)	ECI2	enoyl-CoA	enoyl-CoA delta isomerase 2
hsa00071	Lipid metabolism	Fatty acid degradation - Homo sapiens (human)	CYP2U1	cytochrome	cytochrome P450 family 2 subfamily U member 1
hsa00071	Lipid metabolism	Fatty acid degradation - Homo sapiens (human)	ADH1A	alcohol	alcohol dehydrogenase 1A (class I), alpha polypeptide
hsa00071	Lipid metabolism	Fatty acid degradation - Homo sapiens (human)	ADH1B	alcohol	alcohol dehydrogenase 1B (class I), beta polypeptide
hsa00071	Lipid metabolism	Fatty acid degradation - Homo sapiens (human)	ADH1C	alcohol	alcohol dehydrogenase 1C (class I), gamma polypeptide
hsa00071	Lipid metabolism	Fatty acid degradation - Homo sapiens (human)	ADH7	alcohol	alcohol dehydrogenase 7 (class IV), mu or sigma polypeptide
hsa00071	Lipid metabolism	Fatty acid degradation - Homo sapiens (human)	ADH4	alcohol	alcohol dehydrogenase 4 (class II), pi polypeptide
hsa00071	Lipid metabolism	Fatty acid degradation - Homo sapiens (human)	ADH5	alcohol	alcohol dehydrogenase 5 (class III), chi polypeptide
hsa00071	Lipid metabolism	Fatty acid degradation - Homo sapiens (human)	ADH6	alcohol	alcohol dehydrogenase 6 (class V)
hsa00071	Lipid metabolism	Fatty acid degradation - Homo sapiens (human)	ALDH2	aldehyde	aldehyde dehydrogenase 2 family member
hsa00071	Lipid metabolism	Fatty acid degradation - Homo sapiens (human)	ALDH3A2	aldehyde	aldehyde dehydrogenase 3 family member A2
hsa00071	Lipid metabolism	Fatty acid degradation - Homo sapiens (human)	ALDH1B1	aldehyde	aldehyde dehydrogenase 1 family member B1
hsa00071	Lipid metabolism	Fatty acid degradation - Homo sapiens (human)	ALDH7A1	aldehyde	aldehyde dehydrogenase 7 family member A1
hsa00071	Lipid metabolism	Fatty acid degradation - Homo sapiens (human)	ALDH9A1	aldehyde	aldehyde dehydrogenase 9 family member A1
hsa00100	Lipid metabolism	Steroid biosynthesis - Homo sapiens (human)	FDFT1	farnesyl-diphosphate	farnesyl-diphosphate farnesyltransferase 1
hsa00100	Lipid metabolism	Steroid biosynthesis - Homo sapiens (human)	SQLE	squalene	squalene epoxidase
hsa00100	Lipid metabolism	Steroid biosynthesis - Homo sapiens (human)	LSS	lanosterol	lanosterol synthase
hsa00100	Lipid metabolism	Steroid biosynthesis - Homo sapiens (human)	CYP51A1	cytochrome	cytochrome P450 family 51 subfamily A member 1
hsa00100	Lipid metabolism	Steroid biosynthesis - Homo sapiens (human)	TM7SF2	transmembrane	transmembrane 7 superfamily member 2
hsa00100	Lipid metabolism	Steroid biosynthesis - Homo sapiens (human)	LBR	lamin	lamin B receptor
hsa00100	Lipid metabolism	Steroid biosynthesis - Homo sapiens (human)	MSMO1	methylsterol	methylsterol monooxygenase 1
hsa00100	Lipid metabolism	Steroid biosynthesis - Homo sapiens (human)	NSDHL	NAD(P)	NAD(P) dependent steroid dehydrogenase-like
hsa00100	Lipid metabolism	Steroid biosynthesis - Homo sapiens (human)	HSD17B7	hydroxysteroid	hydroxysteroid 17-beta dehydrogenase 7
hsa00100	Lipid metabolism	Steroid biosynthesis - Homo sapiens (human)	EBP	EBP	EBP cholestenol delta-isomerase
hsa00100	Lipid metabolism	Steroid biosynthesis - Homo sapiens (human)	DHCR24	24-dehydrocholesterol	24-dehydrocholesterol reductase
hsa00100	Lipid metabolism	Steroid biosynthesis - Homo sapiens (human)	SC5D	sterol-C5-desaturase	sterol-C5-desaturase
hsa00100	Lipid metabolism	Steroid biosynthesis - Homo sapiens (human)	DHCR7	7-dehydrocholesterol	7-dehydrocholesterol reductase
hsa00100	Lipid metabolism	Steroid biosynthesis - Homo sapiens (human)	LIPA	lipase	lipase A, lysosomal acid type
hsa00100	Lipid metabolism	Steroid biosynthesis - Homo sapiens (human)	CEL	carboxyl	carboxyl ester lipase
hsa00100	Lipid metabolism	Steroid biosynthesis - Homo sapiens (human)	SOAT2	sterol	sterol O-acyltransferase 2
hsa00100	Lipid metabolism	Steroid biosynthesis - Homo sapiens (human)	SOAT1	sterol	sterol O-acyltransferase 1
hsa00100	Lipid metabolism	Steroid biosynthesis - Homo sapiens (human)	CYP2R1	cytochrome	cytochrome P450 family 2 subfamily R member 1
hsa00100	Lipid metabolism	Steroid biosynthesis - Homo sapiens (human)	CYP27B1	cytochrome	cytochrome P450 family 27 subfamily B member 1
hsa00100	Lipid metabolism	Steroid biosynthesis - Homo sapiens (human)	CYP24A1	cytochrome	cytochrome P450 family 24 subfamily A member 1
hsa00120	Lipid metabolism	Primary bile acid biosynthesis - Homo sapiens (human)	CYP46A1	cytochrome	cytochrome P450 family 46 subfamily A member 1
hsa00120	Lipid metabolism	Primary bile acid biosynthesis - Homo sapiens (human)	CYP39A1	cytochrome	cytochrome P450 family 39 subfamily A member 1
hsa00120	Lipid metabolism	Primary bile acid biosynthesis - Homo sapiens (human)	HSD3B7	hydroxy-delta-5-steroid	hydroxy-delta-5-steroid dehydrogenase, 3 beta- and steroid delta-isomerase 7
hsa00120	Lipid metabolism	Primary bile acid biosynthesis - Homo sapiens (human)	CH25H	cholesterol	cholesterol 25-hydroxylase
hsa00120	Lipid metabolism	Primary bile acid biosynthesis - Homo sapiens (human)	CYP7B1	cytochrome	cytochrome P450 family 7 subfamily B member 1
hsa00120	Lipid metabolism	Primary bile acid biosynthesis - Homo sapiens (human)	CYP7A1	cytochrome	cytochrome P450 family 7 subfamily A member 1
hsa00120	Lipid metabolism	Primary bile acid biosynthesis - Homo sapiens (human)	CYP27A1	cytochrome	cytochrome P450 family 27 subfamily A member 1
hsa00120	Lipid metabolism	Primary bile acid biosynthesis - Homo sapiens (human)	CYP8B1	cytochrome	cytochrome P450 family 8 subfamily B member 1
hsa00120	Lipid metabolism	Primary bile acid biosynthesis - Homo sapiens (human)	AKR1D1	aldo-keto	aldo-keto reductase family 1 member D1
hsa00120	Lipid metabolism	Primary bile acid biosynthesis - Homo sapiens (human)	AKR1C4	aldo-keto	aldo-keto reductase family 1 member C4
hsa00120	Lipid metabolism	Primary bile acid biosynthesis - Homo sapiens (human)	SLC27A5	solute	solute carrier family 27 member 5
hsa00120	Lipid metabolism	Primary bile acid biosynthesis - Homo sapiens (human)	AMACR	alpha-methylacyl-CoA	alpha-methylacyl-CoA racemase
hsa00120	Lipid metabolism	Primary bile acid biosynthesis - Homo sapiens (human)	ACOX2	acyl-CoA	acyl-CoA oxidase 2
hsa00120	Lipid metabolism	Primary bile acid biosynthesis - Homo sapiens (human)	HSD17B4	hydroxysteroid	hydroxysteroid 17-beta dehydrogenase 4
hsa00120	Lipid metabolism	Primary bile acid biosynthesis - Homo sapiens (human)	SCP2	sterol	sterol carrier protein 2
hsa00120	Lipid metabolism	Primary bile acid biosynthesis - Homo sapiens (human)	ACOT8	acyl-CoA	acyl-CoA thioesterase 8
hsa00120	Lipid metabolism	Primary bile acid biosynthesis - Homo sapiens (human)	BAAT	bile	bile acid-CoA:amino acid N-acyltransferase
hsa00140	Lipid metabolism	Steroid hormone biosynthesis - Homo sapiens (human)	CYP11A1	cytochrome	cytochrome P450 family 11 subfamily A member 1
hsa00140	Lipid metabolism	Steroid hormone biosynthesis - Homo sapiens (human)	CYP17A1	cytochrome	cytochrome P450 family 17 subfamily A member 1
hsa00140	Lipid metabolism	Steroid hormone biosynthesis - Homo sapiens (human)	STS	steroid	steroid sulfatase
hsa00140	Lipid metabolism	Steroid hormone biosynthesis - Homo sapiens (human)	SULT2B1	sulfotransferase	sulfotransferase family 2B member 1
hsa00140	Lipid metabolism	Steroid hormone biosynthesis - Homo sapiens (human)	CYP21A2	cytochrome	cytochrome P450 family 21 subfamily A member 2
hsa00140	Lipid metabolism	Steroid hormone biosynthesis - Homo sapiens (human)	HSD3B1	hydroxy-delta-5-steroid	hydroxy-delta-5-steroid dehydrogenase, 3 beta- and steroid delta-isomerase 1
hsa00140	Lipid metabolism	Steroid hormone biosynthesis - Homo sapiens (human)	HSD3B2	hydroxy-delta-5-steroid	hydroxy-delta-5-steroid dehydrogenase, 3 beta- and steroid delta-isomerase 2
hsa00140	Lipid metabolism	Steroid hormone biosynthesis - Homo sapiens (human)	SRD5A1	steroid	steroid 5 alpha-reductase 1
hsa00140	Lipid metabolism	Steroid hormone biosynthesis - Homo sapiens (human)	SRD5A2	steroid	steroid 5 alpha-reductase 2
hsa00140	Lipid metabolism	Steroid hormone biosynthesis - Homo sapiens (human)	SRD5A3	steroid	steroid 5 alpha-reductase 3
hsa00140	Lipid metabolism	Steroid hormone biosynthesis - Homo sapiens (human)	AKR1C2	aldo-keto	aldo-keto reductase family 1 member C2
hsa00140	Lipid metabolism	Steroid hormone biosynthesis - Homo sapiens (human)	AKR1C3	aldo-keto	aldo-keto reductase family 1 member C3
hsa00140	Lipid metabolism	Steroid hormone biosynthesis - Homo sapiens (human)	CYP11B1	cytochrome	cytochrome P450 family 11 subfamily B member 1
hsa00140	Lipid metabolism	Steroid hormone biosynthesis - Homo sapiens (human)	CYP11B2	cytochrome	cytochrome P450 family 11 subfamily B member 2
hsa00140	Lipid metabolism	Steroid hormone biosynthesis - Homo sapiens (human)	AKR1D1	aldo-keto	aldo-keto reductase family 1 member D1
hsa00140	Lipid metabolism	Steroid hormone biosynthesis - Homo sapiens (human)	AKR1C4	aldo-keto	aldo-keto reductase family 1 member C4
hsa00140	Lipid metabolism	Steroid hormone biosynthesis - Homo sapiens (human)	HSD11B1	hydroxysteroid	hydroxysteroid 11-beta dehydrogenase 1
hsa00140	Lipid metabolism	Steroid hormone biosynthesis - Homo sapiens (human)	HSD11B1L	hydroxysteroid	hydroxysteroid 11-beta dehydrogenase 1 like
hsa00140	Lipid metabolism	Steroid hormone biosynthesis - Homo sapiens (human)	HSD11B2	hydroxysteroid	hydroxysteroid 11-beta dehydrogenase 2
hsa00140	Lipid metabolism	Steroid hormone biosynthesis - Homo sapiens (human)	AKR1C1	aldo-keto	aldo-keto reductase family 1 member C1
hsa00140	Lipid metabolism	Steroid hormone biosynthesis - Homo sapiens (human)	CYP7B1	cytochrome	cytochrome P450 family 7 subfamily B member 1
hsa00140	Lipid metabolism	Steroid hormone biosynthesis - Homo sapiens (human)	SULT1E1	sulfotransferase	sulfotransferase family 1E member 1
hsa00140	Lipid metabolism	Steroid hormone biosynthesis - Homo sapiens (human)	HSD17B1	hydroxysteroid	hydroxysteroid 17-beta dehydrogenase 1
hsa00140	Lipid metabolism	Steroid hormone biosynthesis - Homo sapiens (human)	HSD17B2	hydroxysteroid	hydroxysteroid 17-beta dehydrogenase 2
hsa00140	Lipid metabolism	Steroid hormone biosynthesis - Homo sapiens (human)	HSD17B6	hydroxysteroid	hydroxysteroid 17-beta dehydrogenase 6
hsa00140	Lipid metabolism	Steroid hormone biosynthesis - Homo sapiens (human)	HSD17B7	hydroxysteroid	hydroxysteroid 17-beta dehydrogenase 7
hsa00140	Lipid metabolism	Steroid hormone biosynthesis - Homo sapiens (human)	HSD17B8	hydroxysteroid	hydroxysteroid 17-beta dehydrogenase 8
hsa00140	Lipid metabolism	Steroid hormone biosynthesis - Homo sapiens (human)	HSD17B12	hydroxysteroid	hydroxysteroid 17-beta dehydrogenase 12
hsa00140	Lipid metabolism	Steroid hormone biosynthesis - Homo sapiens (human)	DHRS11	dehydrogenase/reductase	dehydrogenase/reductase 11
hsa00140	Lipid metabolism	Steroid hormone biosynthesis - Homo sapiens (human)	CYP1A1	cytochrome	cytochrome P450 family 1 subfamily A member 1
hsa00140	Lipid metabolism	Steroid hormone biosynthesis - Homo sapiens (human)	CYP1A2	cytochrome	cytochrome P450 family 1 subfamily A member 2
hsa00140	Lipid metabolism	Steroid hormone biosynthesis - Homo sapiens (human)	CYP3A5	cytochrome	cytochrome P450 family 3 subfamily A member 5
hsa00140	Lipid metabolism	Steroid hormone biosynthesis - Homo sapiens (human)	CYP3A7	cytochrome	cytochrome P450 family 3 subfamily A member 7
hsa00140	Lipid metabolism	Steroid hormone biosynthesis - Homo sapiens (human)	CYP3A7-CYP3A51P	CYP3A7-CYP3A51P	CYP3A7-CYP3A51P readthrough
hsa00140	Lipid metabolism	Steroid hormone biosynthesis - Homo sapiens (human)	CYP2E1	cytochrome	cytochrome P450 family 2 subfamily E member 1
hsa00140	Lipid metabolism	Steroid hormone biosynthesis - Homo sapiens (human)	CYP3A4	cytochrome	cytochrome P450 family 3 subfamily A member 4
hsa00140	Lipid metabolism	Steroid hormone biosynthesis - Homo sapiens (human)	CYP1B1	cytochrome	cytochrome P450 family 1 subfamily B member 1
hsa00140	Lipid metabolism	Steroid hormone biosynthesis - Homo sapiens (human)	CYP19A1	cytochrome	cytochrome P450 family 19 subfamily A member 1
hsa00140	Lipid metabolism	Steroid hormone biosynthesis - Homo sapiens (human)	CYP7A1	cytochrome	cytochrome P450 family 7 subfamily A member 1
hsa00140	Lipid metabolism	Steroid hormone biosynthesis - Homo sapiens (human)	HSD17B11	hydroxysteroid	hydroxysteroid 17-beta dehydrogenase 11
hsa00140	Lipid metabolism	Steroid hormone biosynthesis - Homo sapiens (human)	UGT2A1	UDP	UDP glucuronosyltransferase family 2 member A1 complex locus
hsa00140	Lipid metabolism	Steroid hormone biosynthesis - Homo sapiens (human)	UGT2A3	UDP	UDP glucuronosyltransferase family 2 member A3
hsa00140	Lipid metabolism	Steroid hormone biosynthesis - Homo sapiens (human)	UGT2B17	UDP	UDP glucuronosyltransferase family 2 member B17
hsa00140	Lipid metabolism	Steroid hormone biosynthesis - Homo sapiens (human)	UGT2B11	UDP	UDP glucuronosyltransferase family 2 member B11
hsa00140	Lipid metabolism	Steroid hormone biosynthesis - Homo sapiens (human)	UGT2B28	UDP	UDP glucuronosyltransferase family 2 member B28
hsa00140	Lipid metabolism	Steroid hormone biosynthesis - Homo sapiens (human)	UGT1A6	UDP	UDP glucuronosyltransferase family 1 member A6
hsa00140	Lipid metabolism	Steroid hormone biosynthesis - Homo sapiens (human)	UGT1A4	UDP	UDP glucuronosyltransferase family 1 member A4
hsa00140	Lipid metabolism	Steroid hormone biosynthesis - Homo sapiens (human)	UGT1A1	UDP	UDP glucuronosyltransferase family 1 member A1
hsa00140	Lipid metabolism	Steroid hormone biosynthesis - Homo sapiens (human)	UGT1A3	UDP	UDP glucuronosyltransferase family 1 member A3
hsa00140	Lipid metabolism	Steroid hormone biosynthesis - Homo sapiens (human)	UGT2B10	UDP	UDP glucuronosyltransferase family 2 member B10
hsa00140	Lipid metabolism	Steroid hormone biosynthesis - Homo sapiens (human)	UGT1A9	UDP	UDP glucuronosyltransferase family 1 member A9
hsa00140	Lipid metabolism	Steroid hormone biosynthesis - Homo sapiens (human)	UGT2B7	UDP	UDP glucuronosyltransferase family 2 member B7
hsa00140	Lipid metabolism	Steroid hormone biosynthesis - Homo sapiens (human)	UGT1A10	UDP	UDP glucuronosyltransferase family 1 member A10
hsa00140	Lipid metabolism	Steroid hormone biosynthesis - Homo sapiens (human)	UGT1A8	UDP	UDP glucuronosyltransferase family 1 member A8
hsa00140	Lipid metabolism	Steroid hormone biosynthesis - Homo sapiens (human)	UGT1A5	UDP	UDP glucuronosyltransferase family 1 member A5
hsa00140	Lipid metabolism	Steroid hormone biosynthesis - Homo sapiens (human)	UGT2B15	UDP	UDP glucuronosyltransferase family 2 member B15
hsa00140	Lipid metabolism	Steroid hormone biosynthesis - Homo sapiens (human)	UGT1A7	UDP	UDP glucuronosyltransferase family 1 member A7
hsa00140	Lipid metabolism	Steroid hormone biosynthesis - Homo sapiens (human)	UGT2B4	UDP	UDP glucuronosyltransferase family 2 member B4
hsa00140	Lipid metabolism	Steroid hormone biosynthesis - Homo sapiens (human)	UGT2A2	UDP	UDP glucuronosyltransferase family 2 member A2
hsa00140	Lipid metabolism	Steroid hormone biosynthesis - Homo sapiens (human)	COMT	catechol-O-methyltransferase	catechol-O-methyltransferase
hsa00140	Lipid metabolism	Steroid hormone biosynthesis - Homo sapiens (human)	LRTOMT	leucine	leucine rich transmembrane and O-methyltransferase domain containing
hsa00140	Lipid metabolism	Steroid hormone biosynthesis - Homo sapiens (human)	HSD17B3	hydroxysteroid	hydroxysteroid 17-beta dehydrogenase 3
hsa00561	Lipid metabolism	Glycerolipid metabolism - Homo sapiens (human)	GLYCTK	glycerate	glycerate kinase
hsa00561	Lipid metabolism	Glycerolipid metabolism - Homo sapiens (human)	ALDH2	aldehyde	aldehyde dehydrogenase 2 family member
hsa00561	Lipid metabolism	Glycerolipid metabolism - Homo sapiens (human)	ALDH3A2	aldehyde	aldehyde dehydrogenase 3 family member A2
hsa00561	Lipid metabolism	Glycerolipid metabolism - Homo sapiens (human)	ALDH1B1	aldehyde	aldehyde dehydrogenase 1 family member B1
hsa00561	Lipid metabolism	Glycerolipid metabolism - Homo sapiens (human)	ALDH7A1	aldehyde	aldehyde dehydrogenase 7 family member A1
hsa00561	Lipid metabolism	Glycerolipid metabolism - Homo sapiens (human)	ALDH9A1	aldehyde	aldehyde dehydrogenase 9 family member A1
hsa00561	Lipid metabolism	Glycerolipid metabolism - Homo sapiens (human)	AKR1B1	aldo-keto	aldo-keto reductase family 1 member B
hsa00561	Lipid metabolism	Glycerolipid metabolism - Homo sapiens (human)	AKR1B10	aldo-keto	aldo-keto reductase family 1 member B10
hsa00561	Lipid metabolism	Glycerolipid metabolism - Homo sapiens (human)	AKR1B15	aldo-keto	aldo-keto reductase family 1 member B15
hsa00561	Lipid metabolism	Glycerolipid metabolism - Homo sapiens (human)	AKR1A1	aldo-keto	aldo-keto reductase family 1 member A1
hsa00561	Lipid metabolism	Glycerolipid metabolism - Homo sapiens (human)	TKFC	triokinase	triokinase and FMN cyclase
hsa00561	Lipid metabolism	Glycerolipid metabolism - Homo sapiens (human)	GK2	glycerol	glycerol kinase 2
hsa00561	Lipid metabolism	Glycerolipid metabolism - Homo sapiens (human)	GK	glycerol	glycerol kinase
hsa00561	Lipid metabolism	Glycerolipid metabolism - Homo sapiens (human)	GK3	glycerol	glycerol kinase 3
hsa00561	Lipid metabolism	Glycerolipid metabolism - Homo sapiens (human)	GPAM	glycerol-3-phosphate	glycerol-3-phosphate acyltransferase, mitochondrial
hsa00561	Lipid metabolism	Glycerolipid metabolism - Homo sapiens (human)	GPAT2	glycerol-3-phosphate	glycerol-3-phosphate acyltransferase 2, mitochondrial
hsa00561	Lipid metabolism	Glycerolipid metabolism - Homo sapiens (human)	AGPAT6	glycerol-3-phosphate	glycerol-3-phosphate acyltransferase 4
hsa00561	Lipid metabolism	Glycerolipid metabolism - Homo sapiens (human)	AGPAT9	glycerol-3-phosphate	glycerol-3-phosphate acyltransferase 3
hsa00561	Lipid metabolism	Glycerolipid metabolism - Homo sapiens (human)	AGPAT1	1-acylglycerol-3-phosphate	1-acylglycerol-3-phosphate O-acyltransferase 1
hsa00561	Lipid metabolism	Glycerolipid metabolism - Homo sapiens (human)	AGPAT2	1-acylglycerol-3-phosphate	1-acylglycerol-3-phosphate O-acyltransferase 2
hsa00561	Lipid metabolism	Glycerolipid metabolism - Homo sapiens (human)	AGPAT3	1-acylglycerol-3-phosphate	1-acylglycerol-3-phosphate O-acyltransferase 3
hsa00561	Lipid metabolism	Glycerolipid metabolism - Homo sapiens (human)	AGPAT4	1-acylglycerol-3-phosphate	1-acylglycerol-3-phosphate O-acyltransferase 4
hsa00561	Lipid metabolism	Glycerolipid metabolism - Homo sapiens (human)	AGPAT5	1-acylglycerol-3-phosphate	1-acylglycerol-3-phosphate O-acyltransferase 5
hsa00561	Lipid metabolism	Glycerolipid metabolism - Homo sapiens (human)	LCLAT1	lysocardiolipin	lysocardiolipin acyltransferase 1
hsa00561	Lipid metabolism	Glycerolipid metabolism - Homo sapiens (human)	MBOAT1	membrane	membrane bound O-acyltransferase domain containing 1
hsa00561	Lipid metabolism	Glycerolipid metabolism - Homo sapiens (human)	MBOAT2	membrane	membrane bound O-acyltransferase domain containing 2
hsa00561	Lipid metabolism	Glycerolipid metabolism - Homo sapiens (human)	PPAP2A	phospholipid	phospholipid phosphatase 1
hsa00561	Lipid metabolism	Glycerolipid metabolism - Homo sapiens (human)	PPAP2B	phospholipid	phospholipid phosphatase 3
hsa00561	Lipid metabolism	Glycerolipid metabolism - Homo sapiens (human)	PPAP2C	phospholipid	phospholipid phosphatase 2
hsa00561	Lipid metabolism	Glycerolipid metabolism - Homo sapiens (human)	LPIN1	lipin	lipin 1
hsa00561	Lipid metabolism	Glycerolipid metabolism - Homo sapiens (human)	LPIN3	lipin	lipin 3
hsa00561	Lipid metabolism	Glycerolipid metabolism - Homo sapiens (human)	LPIN2	lipin	lipin 2
hsa00561	Lipid metabolism	Glycerolipid metabolism - Homo sapiens (human)	PPAPDC1B	phospholipid	phospholipid phosphatase 5
hsa00561	Lipid metabolism	Glycerolipid metabolism - Homo sapiens (human)	PPAPDC1A	phospholipid	phospholipid phosphatase 4
hsa00561	Lipid metabolism	Glycerolipid metabolism - Homo sapiens (human)	DGKZ	diacylglycerol	diacylglycerol kinase zeta
hsa00561	Lipid metabolism	Glycerolipid metabolism - Homo sapiens (human)	DGKD	diacylglycerol	diacylglycerol kinase delta
hsa00561	Lipid metabolism	Glycerolipid metabolism - Homo sapiens (human)	DGKI	diacylglycerol	diacylglycerol kinase iota
hsa00561	Lipid metabolism	Glycerolipid metabolism - Homo sapiens (human)	DGKA	diacylglycerol	diacylglycerol kinase alpha
hsa00561	Lipid metabolism	Glycerolipid metabolism - Homo sapiens (human)	DGKE	diacylglycerol	diacylglycerol kinase epsilon
hsa00561	Lipid metabolism	Glycerolipid metabolism - Homo sapiens (human)	DGKB	diacylglycerol	diacylglycerol kinase beta
hsa00561	Lipid metabolism	Glycerolipid metabolism - Homo sapiens (human)	DGKH	diacylglycerol	diacylglycerol kinase eta
hsa00561	Lipid metabolism	Glycerolipid metabolism - Homo sapiens (human)	DGKG	diacylglycerol	diacylglycerol kinase gamma
hsa00561	Lipid metabolism	Glycerolipid metabolism - Homo sapiens (human)	DGKQ	diacylglycerol	diacylglycerol kinase theta
hsa00561	Lipid metabolism	Glycerolipid metabolism - Homo sapiens (human)	DGKK	diacylglycerol	diacylglycerol kinase kappa
hsa00561	Lipid metabolism	Glycerolipid metabolism - Homo sapiens (human)	DGAT1	diacylglycerol	diacylglycerol O-acyltransferase 1
hsa00561	Lipid metabolism	Glycerolipid metabolism - Homo sapiens (human)	DGAT2	diacylglycerol	diacylglycerol O-acyltransferase 2
hsa00561	Lipid metabolism	Glycerolipid metabolism - Homo sapiens (human)	MOGAT3	monoacylglycerol	monoacylglycerol O-acyltransferase 3
hsa00561	Lipid metabolism	Glycerolipid metabolism - Homo sapiens (human)	CEL	carboxyl	carboxyl ester lipase
hsa00561	Lipid metabolism	Glycerolipid metabolism - Homo sapiens (human)	PNPLA2	patatin	patatin like phospholipase domain containing 2
hsa00561	Lipid metabolism	Glycerolipid metabolism - Homo sapiens (human)	PNPLA3	patatin	patatin like phospholipase domain containing 3
hsa00561	Lipid metabolism	Glycerolipid metabolism - Homo sapiens (human)	PNLIP	pancreatic	pancreatic lipase
hsa00561	Lipid metabolism	Glycerolipid metabolism - Homo sapiens (human)	PNLIPRP1	pancreatic	pancreatic lipase related protein 1
hsa00561	Lipid metabolism	Glycerolipid metabolism - Homo sapiens (human)	PNLIPRP2	pancreatic	pancreatic lipase related protein 2 (gene/pseudogene)
hsa00561	Lipid metabolism	Glycerolipid metabolism - Homo sapiens (human)	PNLIPRP3	pancreatic	pancreatic lipase related protein 3
hsa00561	Lipid metabolism	Glycerolipid metabolism - Homo sapiens (human)	LIPC	lipase	lipase C, hepatic type
hsa00561	Lipid metabolism	Glycerolipid metabolism - Homo sapiens (human)	LIPF	lipase	lipase F, gastric type
hsa00561	Lipid metabolism	Glycerolipid metabolism - Homo sapiens (human)	LIPG	lipase	lipase G, endothelial type
hsa00561	Lipid metabolism	Glycerolipid metabolism - Homo sapiens (human)	LPL	lipoprotein	lipoprotein lipase
hsa00561	Lipid metabolism	Glycerolipid metabolism - Homo sapiens (human)	AGK	acylglycerol	acylglycerol kinase
hsa00561	Lipid metabolism	Glycerolipid metabolism - Homo sapiens (human)	MGLL	monoglyceride	monoglyceride lipase
hsa00561	Lipid metabolism	Glycerolipid metabolism - Homo sapiens (human)	ABHD16A	abhydrolase	abhydrolase domain containing 16A, phospholipase
hsa00561	Lipid metabolism	Glycerolipid metabolism - Homo sapiens (human)	MOGAT1	monoacylglycerol	monoacylglycerol O-acyltransferase 1
hsa00561	Lipid metabolism	Glycerolipid metabolism - Homo sapiens (human)	MOGAT2	monoacylglycerol	monoacylglycerol O-acyltransferase 2
hsa00561	Lipid metabolism	Glycerolipid metabolism - Homo sapiens (human)	GLA	galactosidase	galactosidase alpha
hsa00564	Lipid metabolism	Glycerophospholipid metabolism - Homo sapiens (human)	GPD1L	glycerol-3-phosphate	glycerol-3-phosphate dehydrogenase 1 like
hsa00564	Lipid metabolism	Glycerophospholipid metabolism - Homo sapiens (human)	GPD1	glycerol-3-phosphate	glycerol-3-phosphate dehydrogenase 1
hsa00564	Lipid metabolism	Glycerophospholipid metabolism - Homo sapiens (human)	GPD2	glycerol-3-phosphate	glycerol-3-phosphate dehydrogenase 2
hsa00564	Lipid metabolism	Glycerophospholipid metabolism - Homo sapiens (human)	GPAM	glycerol-3-phosphate	glycerol-3-phosphate acyltransferase, mitochondrial
hsa00564	Lipid metabolism	Glycerophospholipid metabolism - Homo sapiens (human)	GPAT2	glycerol-3-phosphate	glycerol-3-phosphate acyltransferase 2, mitochondrial
hsa00564	Lipid metabolism	Glycerophospholipid metabolism - Homo sapiens (human)	AGPAT6	glycerol-3-phosphate	glycerol-3-phosphate acyltransferase 4
hsa00564	Lipid metabolism	Glycerophospholipid metabolism - Homo sapiens (human)	AGPAT9	glycerol-3-phosphate	glycerol-3-phosphate acyltransferase 3
hsa00564	Lipid metabolism	Glycerophospholipid metabolism - Homo sapiens (human)	AGPAT1	1-acylglycerol-3-phosphate	1-acylglycerol-3-phosphate O-acyltransferase 1
hsa00564	Lipid metabolism	Glycerophospholipid metabolism - Homo sapiens (human)	AGPAT2	1-acylglycerol-3-phosphate	1-acylglycerol-3-phosphate O-acyltransferase 2
hsa00564	Lipid metabolism	Glycerophospholipid metabolism - Homo sapiens (human)	AGPAT3	1-acylglycerol-3-phosphate	1-acylglycerol-3-phosphate O-acyltransferase 3
hsa00564	Lipid metabolism	Glycerophospholipid metabolism - Homo sapiens (human)	AGPAT4	1-acylglycerol-3-phosphate	1-acylglycerol-3-phosphate O-acyltransferase 4
hsa00564	Lipid metabolism	Glycerophospholipid metabolism - Homo sapiens (human)	AGPAT5	1-acylglycerol-3-phosphate	1-acylglycerol-3-phosphate O-acyltransferase 5
hsa00564	Lipid metabolism	Glycerophospholipid metabolism - Homo sapiens (human)	LCLAT1	lysocardiolipin	lysocardiolipin acyltransferase 1
hsa00564	Lipid metabolism	Glycerophospholipid metabolism - Homo sapiens (human)	MBOAT1	membrane	membrane bound O-acyltransferase domain containing 1
hsa00564	Lipid metabolism	Glycerophospholipid metabolism - Homo sapiens (human)	MBOAT2	membrane	membrane bound O-acyltransferase domain containing 2
hsa00564	Lipid metabolism	Glycerophospholipid metabolism - Homo sapiens (human)	GNPAT	glyceronephosphate	glyceronephosphate O-acyltransferase
hsa00564	Lipid metabolism	Glycerophospholipid metabolism - Homo sapiens (human)	ADPRM	ADP-ribose/CDP-alcohol	ADP-ribose/CDP-alcohol diphosphatase, manganese dependent
hsa00564	Lipid metabolism	Glycerophospholipid metabolism - Homo sapiens (human)	PPAP2A	phospholipid	phospholipid phosphatase 1
hsa00564	Lipid metabolism	Glycerophospholipid metabolism - Homo sapiens (human)	PPAP2B	phospholipid	phospholipid phosphatase 3
hsa00564	Lipid metabolism	Glycerophospholipid metabolism - Homo sapiens (human)	PPAP2C	phospholipid	phospholipid phosphatase 2
hsa00564	Lipid metabolism	Glycerophospholipid metabolism - Homo sapiens (human)	LPIN1	lipin	lipin 1
hsa00564	Lipid metabolism	Glycerophospholipid metabolism - Homo sapiens (human)	LPIN3	lipin	lipin 3
hsa00564	Lipid metabolism	Glycerophospholipid metabolism - Homo sapiens (human)	LPIN2	lipin	lipin 2
hsa00564	Lipid metabolism	Glycerophospholipid metabolism - Homo sapiens (human)	PPAPDC1B	phospholipid	phospholipid phosphatase 5
hsa00564	Lipid metabolism	Glycerophospholipid metabolism - Homo sapiens (human)	PPAPDC1A	phospholipid	phospholipid phosphatase 4
hsa00564	Lipid metabolism	Glycerophospholipid metabolism - Homo sapiens (human)	DGKZ	diacylglycerol	diacylglycerol kinase zeta
hsa00564	Lipid metabolism	Glycerophospholipid metabolism - Homo sapiens (human)	DGKD	diacylglycerol	diacylglycerol kinase delta
hsa00564	Lipid metabolism	Glycerophospholipid metabolism - Homo sapiens (human)	DGKI	diacylglycerol	diacylglycerol kinase iota
hsa00564	Lipid metabolism	Glycerophospholipid metabolism - Homo sapiens (human)	DGKA	diacylglycerol	diacylglycerol kinase alpha
hsa00564	Lipid metabolism	Glycerophospholipid metabolism - Homo sapiens (human)	DGKE	diacylglycerol	diacylglycerol kinase epsilon
hsa00564	Lipid metabolism	Glycerophospholipid metabolism - Homo sapiens (human)	DGKB	diacylglycerol	diacylglycerol kinase beta
hsa00564	Lipid metabolism	Glycerophospholipid metabolism - Homo sapiens (human)	DGKH	diacylglycerol	diacylglycerol kinase eta
hsa00564	Lipid metabolism	Glycerophospholipid metabolism - Homo sapiens (human)	DGKG	diacylglycerol	diacylglycerol kinase gamma
hsa00564	Lipid metabolism	Glycerophospholipid metabolism - Homo sapiens (human)	DGKQ	diacylglycerol	diacylglycerol kinase theta
hsa00564	Lipid metabolism	Glycerophospholipid metabolism - Homo sapiens (human)	DGKK	diacylglycerol	diacylglycerol kinase kappa
hsa00564	Lipid metabolism	Glycerophospholipid metabolism - Homo sapiens (human)	CHPT1	choline	choline phosphotransferase 1
hsa00564	Lipid metabolism	Glycerophospholipid metabolism - Homo sapiens (human)	CEPT1	choline/ethanolamine	choline/ethanolamine phosphotransferase 1
hsa00564	Lipid metabolism	Glycerophospholipid metabolism - Homo sapiens (human)	SAMD8	sterile	sterile alpha motif domain containing 8
hsa00564	Lipid metabolism	Glycerophospholipid metabolism - Homo sapiens (human)	SGMS1	sphingomyelin	sphingomyelin synthase 1
hsa00564	Lipid metabolism	Glycerophospholipid metabolism - Homo sapiens (human)	SGMS2	sphingomyelin	sphingomyelin synthase 2
hsa00564	Lipid metabolism	Glycerophospholipid metabolism - Homo sapiens (human)	PLD1	phospholipase	phospholipase D1
hsa00564	Lipid metabolism	Glycerophospholipid metabolism - Homo sapiens (human)	PLD2	phospholipase	phospholipase D2
hsa00564	Lipid metabolism	Glycerophospholipid metabolism - Homo sapiens (human)	PLD3	phospholipase	phospholipase D family member 3
hsa00564	Lipid metabolism	Glycerophospholipid metabolism - Homo sapiens (human)	PLD4	phospholipase	phospholipase D family member 4
hsa00564	Lipid metabolism	Glycerophospholipid metabolism - Homo sapiens (human)	LCAT	lecithin-cholesterol	lecithin-cholesterol acyltransferase
hsa00564	Lipid metabolism	Glycerophospholipid metabolism - Homo sapiens (human)	PLA2G10	phospholipase	phospholipase A2 group X
hsa00564	Lipid metabolism	Glycerophospholipid metabolism - Homo sapiens (human)	PLA2G2D	phospholipase	phospholipase A2 group IID
hsa00564	Lipid metabolism	Glycerophospholipid metabolism - Homo sapiens (human)	PLA2G2E	phospholipase	phospholipase A2 group IIE
hsa00564	Lipid metabolism	Glycerophospholipid metabolism - Homo sapiens (human)	PLA2G3	phospholipase	phospholipase A2 group III
hsa00564	Lipid metabolism	Glycerophospholipid metabolism - Homo sapiens (human)	PLA2G2F	phospholipase	phospholipase A2 group IIF
hsa00564	Lipid metabolism	Glycerophospholipid metabolism - Homo sapiens (human)	PLA2G12A	phospholipase	phospholipase A2 group XIIA
hsa00564	Lipid metabolism	Glycerophospholipid metabolism - Homo sapiens (human)	PLA2G12B	phospholipase	phospholipase A2 group XIIB
hsa00564	Lipid metabolism	Glycerophospholipid metabolism - Homo sapiens (human)	PLA2G1B	phospholipase	phospholipase A2 group IB
hsa00564	Lipid metabolism	Glycerophospholipid metabolism - Homo sapiens (human)	PLA2G5	phospholipase	phospholipase A2 group V
hsa00564	Lipid metabolism	Glycerophospholipid metabolism - Homo sapiens (human)	PLA2G2A	phospholipase	phospholipase A2 group IIA
hsa00564	Lipid metabolism	Glycerophospholipid metabolism - Homo sapiens (human)	PLA2G2C	phospholipase	phospholipase A2 group IIC
hsa00564	Lipid metabolism	Glycerophospholipid metabolism - Homo sapiens (human)	PLA2G4E	phospholipase	phospholipase A2 group IVE
hsa00564	Lipid metabolism	Glycerophospholipid metabolism - Homo sapiens (human)	PLA2G4A	phospholipase	phospholipase A2 group IVA
hsa00564	Lipid metabolism	Glycerophospholipid metabolism - Homo sapiens (human)	JMJD7-PLA2G4B	JMJD7-PLA2G4B	JMJD7-PLA2G4B readthrough
hsa00564	Lipid metabolism	Glycerophospholipid metabolism - Homo sapiens (human)	PLA2G4B	phospholipase	phospholipase A2 group IVB
hsa00564	Lipid metabolism	Glycerophospholipid metabolism - Homo sapiens (human)	PLA2G4C	phospholipase	phospholipase A2 group IVC
hsa00564	Lipid metabolism	Glycerophospholipid metabolism - Homo sapiens (human)	PLA2G4D	phospholipase	phospholipase A2 group IVD
hsa00564	Lipid metabolism	Glycerophospholipid metabolism - Homo sapiens (human)	PLA2G4F	phospholipase	phospholipase A2 group IVF
hsa00564	Lipid metabolism	Glycerophospholipid metabolism - Homo sapiens (human)	PLA2G6	phospholipase	phospholipase A2 group VI
hsa00564	Lipid metabolism	Glycerophospholipid metabolism - Homo sapiens (human)	PLB1	phospholipase	phospholipase B1
hsa00564	Lipid metabolism	Glycerophospholipid metabolism - Homo sapiens (human)	PLA2G16	phospholipase	phospholipase A and acyltransferase 3
hsa00564	Lipid metabolism	Glycerophospholipid metabolism - Homo sapiens (human)	HRASLS2	phospholipase	phospholipase A and acyltransferase 2
hsa00564	Lipid metabolism	Glycerophospholipid metabolism - Homo sapiens (human)	LPCAT2	lysophosphatidylcholine	lysophosphatidylcholine acyltransferase 2
hsa00564	Lipid metabolism	Glycerophospholipid metabolism - Homo sapiens (human)	LPCAT1	lysophosphatidylcholine	lysophosphatidylcholine acyltransferase 1
hsa00564	Lipid metabolism	Glycerophospholipid metabolism - Homo sapiens (human)	LPCAT4	lysophosphatidylcholine	lysophosphatidylcholine acyltransferase 4
hsa00564	Lipid metabolism	Glycerophospholipid metabolism - Homo sapiens (human)	LPCAT3	lysophosphatidylcholine	lysophosphatidylcholine acyltransferase 3
hsa00564	Lipid metabolism	Glycerophospholipid metabolism - Homo sapiens (human)	LYPLA1	lysophospholipase	lysophospholipase 1
hsa00564	Lipid metabolism	Glycerophospholipid metabolism - Homo sapiens (human)	PLA2G15	phospholipase	phospholipase A2 group XV
hsa00564	Lipid metabolism	Glycerophospholipid metabolism - Homo sapiens (human)	LYPLA2	lysophospholipase	lysophospholipase 2
hsa00564	Lipid metabolism	Glycerophospholipid metabolism - Homo sapiens (human)	PNPLA6	patatin	patatin like phospholipase domain containing 6
hsa00564	Lipid metabolism	Glycerophospholipid metabolism - Homo sapiens (human)	PNPLA7	patatin	patatin like phospholipase domain containing 7
hsa00564	Lipid metabolism	Glycerophospholipid metabolism - Homo sapiens (human)	GPCPD1	glycerophosphocholine	glycerophosphocholine phosphodiesterase 1
hsa00564	Lipid metabolism	Glycerophospholipid metabolism - Homo sapiens (human)	CHAT	choline	choline O-acetyltransferase
hsa00564	Lipid metabolism	Glycerophospholipid metabolism - Homo sapiens (human)	ACHE	acetylcholinesterase	acetylcholinesterase (Yt blood group)
hsa00564	Lipid metabolism	Glycerophospholipid metabolism - Homo sapiens (human)	CHKA	choline	choline kinase alpha
hsa00564	Lipid metabolism	Glycerophospholipid metabolism - Homo sapiens (human)	CHKB	choline	choline kinase beta
hsa00564	Lipid metabolism	Glycerophospholipid metabolism - Homo sapiens (human)	PHOSPHO1	phosphoethanolamine/phosphocholine	phosphoethanolamine/phosphocholine phosphatase 1
hsa00564	Lipid metabolism	Glycerophospholipid metabolism - Homo sapiens (human)	PCYT1B	phosphate	phosphate cytidylyltransferase 1B, choline
hsa00564	Lipid metabolism	Glycerophospholipid metabolism - Homo sapiens (human)	PCYT1A	phosphate	phosphate cytidylyltransferase 1A, choline
hsa00564	Lipid metabolism	Glycerophospholipid metabolism - Homo sapiens (human)	EPT1	selenoprotein	selenoprotein I
hsa00564	Lipid metabolism	Glycerophospholipid metabolism - Homo sapiens (human)	ETNK1	ethanolamine	ethanolamine kinase 1
hsa00564	Lipid metabolism	Glycerophospholipid metabolism - Homo sapiens (human)	ETNK2	ethanolamine	ethanolamine kinase 2
hsa00564	Lipid metabolism	Glycerophospholipid metabolism - Homo sapiens (human)	PCYT2	phosphate	phosphate cytidylyltransferase 2, ethanolamine
hsa00564	Lipid metabolism	Glycerophospholipid metabolism - Homo sapiens (human)	ETNPPL	ethanolamine-phosphate	ethanolamine-phosphate phospho-lyase
hsa00564	Lipid metabolism	Glycerophospholipid metabolism - Homo sapiens (human)	PEMT	phosphatidylethanolamine	phosphatidylethanolamine N-methyltransferase
hsa00564	Lipid metabolism	Glycerophospholipid metabolism - Homo sapiens (human)	CDS1	CDP-diacylglycerol	CDP-diacylglycerol synthase 1
hsa00564	Lipid metabolism	Glycerophospholipid metabolism - Homo sapiens (human)	CDS2	CDP-diacylglycerol	CDP-diacylglycerol synthase 2
hsa00564	Lipid metabolism	Glycerophospholipid metabolism - Homo sapiens (human)	PLA1A	phospholipase	phospholipase A1 member A
hsa00564	Lipid metabolism	Glycerophospholipid metabolism - Homo sapiens (human)	PTDSS1	phosphatidylserine	phosphatidylserine synthase 1
hsa00564	Lipid metabolism	Glycerophospholipid metabolism - Homo sapiens (human)	PTDSS2	phosphatidylserine	phosphatidylserine synthase 2
hsa00564	Lipid metabolism	Glycerophospholipid metabolism - Homo sapiens (human)	PISD	phosphatidylserine	phosphatidylserine decarboxylase
hsa00564	Lipid metabolism	Glycerophospholipid metabolism - Homo sapiens (human)	PGS1	phosphatidylglycerophosphate	phosphatidylglycerophosphate synthase 1
hsa00564	Lipid metabolism	Glycerophospholipid metabolism - Homo sapiens (human)	CRLS1	cardiolipin	cardiolipin synthase 1
hsa00564	Lipid metabolism	Glycerophospholipid metabolism - Homo sapiens (human)	TAZ	tafazzin,	tafazzin, phospholipid-lysophospholipid transacylase
hsa00564	Lipid metabolism	Glycerophospholipid metabolism - Homo sapiens (human)	LPGAT1	lysophosphatidylglycerol	lysophosphatidylglycerol acyltransferase 1
hsa00564	Lipid metabolism	Glycerophospholipid metabolism - Homo sapiens (human)	CDIPT	CDP-diacylglycerol--inositol	CDP-diacylglycerol--inositol 3-phosphatidyltransferase
hsa00564	Lipid metabolism	Glycerophospholipid metabolism - Homo sapiens (human)	MBOAT7	membrane	membrane bound O-acyltransferase domain containing 7
hsa00565	Lipid metabolism	Ether lipid metabolism - Homo sapiens (human)	AGPS	alkylglycerone	alkylglycerone phosphate synthase
hsa00565	Lipid metabolism	Ether lipid metabolism - Homo sapiens (human)	PPAP2A	phospholipid	phospholipid phosphatase 1
hsa00565	Lipid metabolism	Ether lipid metabolism - Homo sapiens (human)	PPAP2B	phospholipid	phospholipid phosphatase 3
hsa00565	Lipid metabolism	Ether lipid metabolism - Homo sapiens (human)	PPAP2C	phospholipid	phospholipid phosphatase 2
hsa00565	Lipid metabolism	Ether lipid metabolism - Homo sapiens (human)	EPT1	selenoprotein	selenoprotein I
hsa00565	Lipid metabolism	Ether lipid metabolism - Homo sapiens (human)	CHPT1	choline	choline phosphotransferase 1
hsa00565	Lipid metabolism	Ether lipid metabolism - Homo sapiens (human)	CEPT1	choline/ethanolamine	choline/ethanolamine phosphotransferase 1
hsa00565	Lipid metabolism	Ether lipid metabolism - Homo sapiens (human)	TMEM189-UBE2V1	plasmanylethanolamine	plasmanylethanolamine desaturase 1
hsa00565	Lipid metabolism	Ether lipid metabolism - Homo sapiens (human)	TMEM189-UBE2V1	PEDS1-UBE2V1	PEDS1-UBE2V1 readthrough
hsa00565	Lipid metabolism	Ether lipid metabolism - Homo sapiens (human)	PLA2G10	phospholipase	phospholipase A2 group X
hsa00565	Lipid metabolism	Ether lipid metabolism - Homo sapiens (human)	PLA2G2D	phospholipase	phospholipase A2 group IID
hsa00565	Lipid metabolism	Ether lipid metabolism - Homo sapiens (human)	PLA2G2E	phospholipase	phospholipase A2 group IIE
hsa00565	Lipid metabolism	Ether lipid metabolism - Homo sapiens (human)	PLA2G3	phospholipase	phospholipase A2 group III
hsa00565	Lipid metabolism	Ether lipid metabolism - Homo sapiens (human)	PLA2G2F	phospholipase	phospholipase A2 group IIF
hsa00565	Lipid metabolism	Ether lipid metabolism - Homo sapiens (human)	PLA2G12A	phospholipase	phospholipase A2 group XIIA
hsa00565	Lipid metabolism	Ether lipid metabolism - Homo sapiens (human)	PLA2G12B	phospholipase	phospholipase A2 group XIIB
hsa00565	Lipid metabolism	Ether lipid metabolism - Homo sapiens (human)	PLA2G1B	phospholipase	phospholipase A2 group IB
hsa00565	Lipid metabolism	Ether lipid metabolism - Homo sapiens (human)	PLA2G5	phospholipase	phospholipase A2 group V
hsa00565	Lipid metabolism	Ether lipid metabolism - Homo sapiens (human)	PLA2G2A	phospholipase	phospholipase A2 group IIA
hsa00565	Lipid metabolism	Ether lipid metabolism - Homo sapiens (human)	PLA2G2C	phospholipase	phospholipase A2 group IIC
hsa00565	Lipid metabolism	Ether lipid metabolism - Homo sapiens (human)	PLA2G4E	phospholipase	phospholipase A2 group IVE
hsa00565	Lipid metabolism	Ether lipid metabolism - Homo sapiens (human)	PLA2G4A	phospholipase	phospholipase A2 group IVA
hsa00565	Lipid metabolism	Ether lipid metabolism - Homo sapiens (human)	JMJD7-PLA2G4B	JMJD7-PLA2G4B	JMJD7-PLA2G4B readthrough
hsa00565	Lipid metabolism	Ether lipid metabolism - Homo sapiens (human)	PLA2G4B	phospholipase	phospholipase A2 group IVB
hsa00565	Lipid metabolism	Ether lipid metabolism - Homo sapiens (human)	PLA2G4C	phospholipase	phospholipase A2 group IVC
hsa00565	Lipid metabolism	Ether lipid metabolism - Homo sapiens (human)	PLA2G4D	phospholipase	phospholipase A2 group IVD
hsa00565	Lipid metabolism	Ether lipid metabolism - Homo sapiens (human)	PLA2G4F	phospholipase	phospholipase A2 group IVF
hsa00565	Lipid metabolism	Ether lipid metabolism - Homo sapiens (human)	PLA2G6	phospholipase	phospholipase A2 group VI
hsa00565	Lipid metabolism	Ether lipid metabolism - Homo sapiens (human)	PLB1	phospholipase	phospholipase B1
hsa00565	Lipid metabolism	Ether lipid metabolism - Homo sapiens (human)	PLA2G16	phospholipase	phospholipase A and acyltransferase 3
hsa00565	Lipid metabolism	Ether lipid metabolism - Homo sapiens (human)	HRASLS2	phospholipase	phospholipase A and acyltransferase 2
hsa00565	Lipid metabolism	Ether lipid metabolism - Homo sapiens (human)	LPCAT4	lysophosphatidylcholine	lysophosphatidylcholine acyltransferase 4
hsa00565	Lipid metabolism	Ether lipid metabolism - Homo sapiens (human)	ENPP6	ectonucleotide	ectonucleotide pyrophosphatase/phosphodiesterase 6
hsa00565	Lipid metabolism	Ether lipid metabolism - Homo sapiens (human)	ENPP2	ectonucleotide	ectonucleotide pyrophosphatase/phosphodiesterase 2
hsa00565	Lipid metabolism	Ether lipid metabolism - Homo sapiens (human)	GDPD3	glycerophosphodiester	glycerophosphodiester phosphodiesterase domain containing 3
hsa00565	Lipid metabolism	Ether lipid metabolism - Homo sapiens (human)	GDPD1	glycerophosphodiester	glycerophosphodiester phosphodiesterase domain containing 1
hsa00565	Lipid metabolism	Ether lipid metabolism - Homo sapiens (human)	TMEM86B	transmembrane	transmembrane protein 86B
hsa00565	Lipid metabolism	Ether lipid metabolism - Homo sapiens (human)	PLD1	phospholipase	phospholipase D1
hsa00565	Lipid metabolism	Ether lipid metabolism - Homo sapiens (human)	PLD2	phospholipase	phospholipase D2
hsa00565	Lipid metabolism	Ether lipid metabolism - Homo sapiens (human)	PLD3	phospholipase	phospholipase D family member 3
hsa00565	Lipid metabolism	Ether lipid metabolism - Homo sapiens (human)	PLD4	phospholipase	phospholipase D family member 4
hsa00565	Lipid metabolism	Ether lipid metabolism - Homo sapiens (human)	UGT8	UDP	UDP glycosyltransferase 8
hsa00565	Lipid metabolism	Ether lipid metabolism - Homo sapiens (human)	GAL3ST1	galactose-3-O-sulfotransferase	galactose-3-O-sulfotransferase 1
hsa00565	Lipid metabolism	Ether lipid metabolism - Homo sapiens (human)	LPCAT2	lysophosphatidylcholine	lysophosphatidylcholine acyltransferase 2
hsa00565	Lipid metabolism	Ether lipid metabolism - Homo sapiens (human)	LPCAT1	lysophosphatidylcholine	lysophosphatidylcholine acyltransferase 1
hsa00565	Lipid metabolism	Ether lipid metabolism - Homo sapiens (human)	PAFAH1B1	platelet	platelet activating factor acetylhydrolase 1b regulatory subunit 1
hsa00565	Lipid metabolism	Ether lipid metabolism - Homo sapiens (human)	PAFAH1B2	platelet	platelet activating factor acetylhydrolase 1b catalytic subunit 2
hsa00565	Lipid metabolism	Ether lipid metabolism - Homo sapiens (human)	PAFAH1B3	platelet	platelet activating factor acetylhydrolase 1b catalytic subunit 3
hsa00565	Lipid metabolism	Ether lipid metabolism - Homo sapiens (human)	PLA2G7	phospholipase	phospholipase A2 group VII
hsa00565	Lipid metabolism	Ether lipid metabolism - Homo sapiens (human)	PAFAH2	platelet	platelet activating factor acetylhydrolase 2
hsa00600	Lipid metabolism	Sphingolipid metabolism - Homo sapiens (human)	SPTLC1	serine	serine palmitoyltransferase long chain base subunit 1
hsa00600	Lipid metabolism	Sphingolipid metabolism - Homo sapiens (human)	SPTLC2	serine	serine palmitoyltransferase long chain base subunit 2
hsa00600	Lipid metabolism	Sphingolipid metabolism - Homo sapiens (human)	SPTLC3	serine	serine palmitoyltransferase long chain base subunit 3
hsa00600	Lipid metabolism	Sphingolipid metabolism - Homo sapiens (human)	KDSR	3-ketodihydrosphingosine	3-ketodihydrosphingosine reductase
hsa00600	Lipid metabolism	Sphingolipid metabolism - Homo sapiens (human)	CERS1	ceramide	ceramide synthase 1
hsa00600	Lipid metabolism	Sphingolipid metabolism - Homo sapiens (human)	CERS2	ceramide	ceramide synthase 2
hsa00600	Lipid metabolism	Sphingolipid metabolism - Homo sapiens (human)	CERS4	ceramide	ceramide synthase 4
hsa00600	Lipid metabolism	Sphingolipid metabolism - Homo sapiens (human)	CERS3	ceramide	ceramide synthase 3
hsa00600	Lipid metabolism	Sphingolipid metabolism - Homo sapiens (human)	CERS6	ceramide	ceramide synthase 6
hsa00600	Lipid metabolism	Sphingolipid metabolism - Homo sapiens (human)	CERS5	ceramide	ceramide synthase 5
hsa00600	Lipid metabolism	Sphingolipid metabolism - Homo sapiens (human)	ASAH1	N-acylsphingosine	N-acylsphingosine amidohydrolase 1
hsa00600	Lipid metabolism	Sphingolipid metabolism - Homo sapiens (human)	ASAH2	N-acylsphingosine	N-acylsphingosine amidohydrolase 2
hsa00600	Lipid metabolism	Sphingolipid metabolism - Homo sapiens (human)	ACER2	alkaline	alkaline ceramidase 2
hsa00600	Lipid metabolism	Sphingolipid metabolism - Homo sapiens (human)	ACER1	alkaline	alkaline ceramidase 1
hsa00600	Lipid metabolism	Sphingolipid metabolism - Homo sapiens (human)	ACER3	alkaline	alkaline ceramidase 3
hsa00600	Lipid metabolism	Sphingolipid metabolism - Homo sapiens (human)	DEGS1	delta	delta 4-desaturase, sphingolipid 1
hsa00600	Lipid metabolism	Sphingolipid metabolism - Homo sapiens (human)	DEGS2	delta	delta 4-desaturase, sphingolipid 2
hsa00600	Lipid metabolism	Sphingolipid metabolism - Homo sapiens (human)	SGMS1	sphingomyelin	sphingomyelin synthase 1
hsa00600	Lipid metabolism	Sphingolipid metabolism - Homo sapiens (human)	SGMS2	sphingomyelin	sphingomyelin synthase 2
hsa00600	Lipid metabolism	Sphingolipid metabolism - Homo sapiens (human)	SMPD1	sphingomyelin	sphingomyelin phosphodiesterase 1
hsa00600	Lipid metabolism	Sphingolipid metabolism - Homo sapiens (human)	SMPD2	sphingomyelin	sphingomyelin phosphodiesterase 2
hsa00600	Lipid metabolism	Sphingolipid metabolism - Homo sapiens (human)	SMPD3	sphingomyelin	sphingomyelin phosphodiesterase 3
hsa00600	Lipid metabolism	Sphingolipid metabolism - Homo sapiens (human)	SMPD4	sphingomyelin	sphingomyelin phosphodiesterase 4
hsa00600	Lipid metabolism	Sphingolipid metabolism - Homo sapiens (human)	ENPP7	ectonucleotide	ectonucleotide pyrophosphatase/phosphodiesterase 7
hsa00600	Lipid metabolism	Sphingolipid metabolism - Homo sapiens (human)	CERK	ceramide	ceramide kinase
hsa00600	Lipid metabolism	Sphingolipid metabolism - Homo sapiens (human)	PPAP2A	phospholipid	phospholipid phosphatase 1
hsa00600	Lipid metabolism	Sphingolipid metabolism - Homo sapiens (human)	PPAP2B	phospholipid	phospholipid phosphatase 3
hsa00600	Lipid metabolism	Sphingolipid metabolism - Homo sapiens (human)	PPAP2C	phospholipid	phospholipid phosphatase 2
hsa00600	Lipid metabolism	Sphingolipid metabolism - Homo sapiens (human)	SGPP1	sphingosine-1-phosphate	sphingosine-1-phosphate phosphatase 1
hsa00600	Lipid metabolism	Sphingolipid metabolism - Homo sapiens (human)	SGPP2	sphingosine-1-phosphate	sphingosine-1-phosphate phosphatase 2
hsa00600	Lipid metabolism	Sphingolipid metabolism - Homo sapiens (human)	SPHK1	sphingosine	sphingosine kinase 1
hsa00600	Lipid metabolism	Sphingolipid metabolism - Homo sapiens (human)	SPHK2	sphingosine	sphingosine kinase 2
hsa00600	Lipid metabolism	Sphingolipid metabolism - Homo sapiens (human)	SGPL1	sphingosine-1-phosphate	sphingosine-1-phosphate lyase 1
hsa00600	Lipid metabolism	Sphingolipid metabolism - Homo sapiens (human)	UGCG	UDP-glucose	UDP-glucose ceramide glucosyltransferase
hsa00600	Lipid metabolism	Sphingolipid metabolism - Homo sapiens (human)	PITPNM1	glucosylceramidase	glucosylceramidase beta 1
hsa00600	Lipid metabolism	Sphingolipid metabolism - Homo sapiens (human)	GBA2	glucosylceramidase	glucosylceramidase beta 2
hsa00600	Lipid metabolism	Sphingolipid metabolism - Homo sapiens (human)	B4GALT6	beta-1,4-galactosyltransferase	beta-1,4-galactosyltransferase 6
hsa00600	Lipid metabolism	Sphingolipid metabolism - Homo sapiens (human)	B4GALT5	beta-1,4-galactosyltransferase	beta-1,4-galactosyltransferase 5
hsa00600	Lipid metabolism	Sphingolipid metabolism - Homo sapiens (human)	GLB1	galactosidase	galactosidase beta 1
hsa00600	Lipid metabolism	Sphingolipid metabolism - Homo sapiens (human)	UGT8	UDP	UDP glycosyltransferase 8
hsa00600	Lipid metabolism	Sphingolipid metabolism - Homo sapiens (human)	GALC	galactosylceramidase	galactosylceramidase
hsa00600	Lipid metabolism	Sphingolipid metabolism - Homo sapiens (human)	GAL3ST1	galactose-3-O-sulfotransferase	galactose-3-O-sulfotransferase 1
hsa00600	Lipid metabolism	Sphingolipid metabolism - Homo sapiens (human)	ARSA	arylsulfatase	arylsulfatase A
hsa00600	Lipid metabolism	Sphingolipid metabolism - Homo sapiens (human)	NEU1	neuraminidase	neuraminidase 1
hsa00600	Lipid metabolism	Sphingolipid metabolism - Homo sapiens (human)	NEU3	neuraminidase	neuraminidase 3
hsa00600	Lipid metabolism	Sphingolipid metabolism - Homo sapiens (human)	NEU4	neuraminidase	neuraminidase 4
hsa00600	Lipid metabolism	Sphingolipid metabolism - Homo sapiens (human)	NEU2	neuraminidase	neuraminidase 2
hsa00600	Lipid metabolism	Sphingolipid metabolism - Homo sapiens (human)	GLA	galactosidase	galactosidase alpha
hsa00600	Lipid metabolism	Sphingolipid metabolism - Homo sapiens (human)	B4GALNT1	beta-1,4-N-acetyl-galactosaminyltransferase	beta-1,4-N-acetyl-galactosaminyltransferase 1
hsa00600	Lipid metabolism	Sphingolipid metabolism - Homo sapiens (human)	HEXA	hexosaminidase	hexosaminidase subunit alpha
hsa00600	Lipid metabolism	Sphingolipid metabolism - Homo sapiens (human)	HEXB	hexosaminidase	hexosaminidase subunit beta
hsa00600	Lipid metabolism	Sphingolipid metabolism - Homo sapiens (human)	GM2A	ganglioside	ganglioside GM2 activator
hsa00600	Lipid metabolism	Sphingolipid metabolism - Homo sapiens (human)	PSAP	prosaposin	prosaposin
hsa00600	Lipid metabolism	Sphingolipid metabolism - Homo sapiens (human)	PSAPL1	prosaposin	prosaposin like 1
hsa00590	Lipid metabolism	Arachidonic acid metabolism - Homo sapiens (human)	PLA2G10	phospholipase	phospholipase A2 group X
hsa00590	Lipid metabolism	Arachidonic acid metabolism - Homo sapiens (human)	PLA2G2D	phospholipase	phospholipase A2 group IID
hsa00590	Lipid metabolism	Arachidonic acid metabolism - Homo sapiens (human)	PLA2G2E	phospholipase	phospholipase A2 group IIE
hsa00590	Lipid metabolism	Arachidonic acid metabolism - Homo sapiens (human)	PLA2G3	phospholipase	phospholipase A2 group III
hsa00590	Lipid metabolism	Arachidonic acid metabolism - Homo sapiens (human)	PLA2G2F	phospholipase	phospholipase A2 group IIF
hsa00590	Lipid metabolism	Arachidonic acid metabolism - Homo sapiens (human)	PLA2G12A	phospholipase	phospholipase A2 group XIIA
hsa00590	Lipid metabolism	Arachidonic acid metabolism - Homo sapiens (human)	PLA2G12B	phospholipase	phospholipase A2 group XIIB
hsa00590	Lipid metabolism	Arachidonic acid metabolism - Homo sapiens (human)	PLA2G1B	phospholipase	phospholipase A2 group IB
hsa00590	Lipid metabolism	Arachidonic acid metabolism - Homo sapiens (human)	PLA2G5	phospholipase	phospholipase A2 group V
hsa00590	Lipid metabolism	Arachidonic acid metabolism - Homo sapiens (human)	PLA2G2A	phospholipase	phospholipase A2 group IIA
hsa00590	Lipid metabolism	Arachidonic acid metabolism - Homo sapiens (human)	PLA2G2C	phospholipase	phospholipase A2 group IIC
hsa00590	Lipid metabolism	Arachidonic acid metabolism - Homo sapiens (human)	PLA2G4E	phospholipase	phospholipase A2 group IVE
hsa00590	Lipid metabolism	Arachidonic acid metabolism - Homo sapiens (human)	PLA2G4A	phospholipase	phospholipase A2 group IVA
hsa00590	Lipid metabolism	Arachidonic acid metabolism - Homo sapiens (human)	JMJD7-PLA2G4B	JMJD7-PLA2G4B	JMJD7-PLA2G4B readthrough
hsa00590	Lipid metabolism	Arachidonic acid metabolism - Homo sapiens (human)	PLA2G4B	phospholipase	phospholipase A2 group IVB
hsa00590	Lipid metabolism	Arachidonic acid metabolism - Homo sapiens (human)	PLA2G4C	phospholipase	phospholipase A2 group IVC
hsa00590	Lipid metabolism	Arachidonic acid metabolism - Homo sapiens (human)	PLA2G4D	phospholipase	phospholipase A2 group IVD
hsa00590	Lipid metabolism	Arachidonic acid metabolism - Homo sapiens (human)	PLA2G4F	phospholipase	phospholipase A2 group IVF
hsa00590	Lipid metabolism	Arachidonic acid metabolism - Homo sapiens (human)	PLA2G6	phospholipase	phospholipase A2 group VI
hsa00590	Lipid metabolism	Arachidonic acid metabolism - Homo sapiens (human)	PLB1	phospholipase	phospholipase B1
hsa00590	Lipid metabolism	Arachidonic acid metabolism - Homo sapiens (human)	PLA2G16	phospholipase	phospholipase A and acyltransferase 3
hsa00590	Lipid metabolism	Arachidonic acid metabolism - Homo sapiens (human)	HRASLS2	phospholipase	phospholipase A and acyltransferase 2
hsa00590	Lipid metabolism	Arachidonic acid metabolism - Homo sapiens (human)	PTGS1	prostaglandin-endoperoxide	prostaglandin-endoperoxide synthase 1
hsa00590	Lipid metabolism	Arachidonic acid metabolism - Homo sapiens (human)	PTGS2	prostaglandin-endoperoxide	prostaglandin-endoperoxide synthase 2
hsa00590	Lipid metabolism	Arachidonic acid metabolism - Homo sapiens (human)	PTGES	prostaglandin	prostaglandin E synthase
hsa00590	Lipid metabolism	Arachidonic acid metabolism - Homo sapiens (human)	PTGES2	prostaglandin	prostaglandin E synthase 2
hsa00590	Lipid metabolism	Arachidonic acid metabolism - Homo sapiens (human)	PTGES3	prostaglandin	prostaglandin E synthase 3
hsa00590	Lipid metabolism	Arachidonic acid metabolism - Homo sapiens (human)	CBR1	carbonyl	carbonyl reductase 1
hsa00590	Lipid metabolism	Arachidonic acid metabolism - Homo sapiens (human)	CBR3	carbonyl	carbonyl reductase 3
hsa00590	Lipid metabolism	Arachidonic acid metabolism - Homo sapiens (human)	FAM213B	peroxiredoxin	peroxiredoxin like 2B
hsa00590	Lipid metabolism	Arachidonic acid metabolism - Homo sapiens (human)	HPGD	15-hydroxyprostaglandin	15-hydroxyprostaglandin dehydrogenase
hsa00590	Lipid metabolism	Arachidonic acid metabolism - Homo sapiens (human)	TBXAS1	thromboxane	thromboxane A synthase 1
hsa00590	Lipid metabolism	Arachidonic acid metabolism - Homo sapiens (human)	PTGDS	prostaglandin	prostaglandin D2 synthase
hsa00590	Lipid metabolism	Arachidonic acid metabolism - Homo sapiens (human)	HPGDS	hematopoietic	hematopoietic prostaglandin D synthase
hsa00590	Lipid metabolism	Arachidonic acid metabolism - Homo sapiens (human)	AKR1C3	aldo-keto	aldo-keto reductase family 1 member C3
hsa00590	Lipid metabolism	Arachidonic acid metabolism - Homo sapiens (human)	PTGIS	prostaglandin	prostaglandin I2 synthase
hsa00590	Lipid metabolism	Arachidonic acid metabolism - Homo sapiens (human)	ALOX5	arachidonate	arachidonate 5-lipoxygenase
hsa00590	Lipid metabolism	Arachidonic acid metabolism - Homo sapiens (human)	LTA4H	leukotriene	leukotriene A4 hydrolase
hsa00590	Lipid metabolism	Arachidonic acid metabolism - Homo sapiens (human)	ZADH2	prostaglandin	prostaglandin reductase 3
hsa00590	Lipid metabolism	Arachidonic acid metabolism - Homo sapiens (human)	PTGR2	prostaglandin	prostaglandin reductase 2
hsa00590	Lipid metabolism	Arachidonic acid metabolism - Homo sapiens (human)	PTGR1	prostaglandin	prostaglandin reductase 1
hsa00590	Lipid metabolism	Arachidonic acid metabolism - Homo sapiens (human)	CYP4F2	cytochrome	cytochrome P450 family 4 subfamily F member 2
hsa00590	Lipid metabolism	Arachidonic acid metabolism - Homo sapiens (human)	CYP4F3	cytochrome	cytochrome P450 family 4 subfamily F member 3
hsa00590	Lipid metabolism	Arachidonic acid metabolism - Homo sapiens (human)	LTC4S	leukotriene	leukotriene C4 synthase
hsa00590	Lipid metabolism	Arachidonic acid metabolism - Homo sapiens (human)	GGT1	gamma-glutamyltransferase	gamma-glutamyltransferase 1
hsa00590	Lipid metabolism	Arachidonic acid metabolism - Homo sapiens (human)	GGT5	gamma-glutamyltransferase	gamma-glutamyltransferase 5
hsa00590	Lipid metabolism	Arachidonic acid metabolism - Homo sapiens (human)	GGT2	inactive	inactive glutathione hydrolase 2
hsa00590	Lipid metabolism	Arachidonic acid metabolism - Homo sapiens (human)	GPX4	glutathione	glutathione peroxidase 4
hsa00590	Lipid metabolism	Arachidonic acid metabolism - Homo sapiens (human)	CYP2E1	cytochrome	cytochrome P450 family 2 subfamily E member 1
hsa00590	Lipid metabolism	Arachidonic acid metabolism - Homo sapiens (human)	CYP2J2	cytochrome	cytochrome P450 family 2 subfamily J member 2
hsa00590	Lipid metabolism	Arachidonic acid metabolism - Homo sapiens (human)	CYP2U1	cytochrome	cytochrome P450 family 2 subfamily U member 1
hsa00590	Lipid metabolism	Arachidonic acid metabolism - Homo sapiens (human)	CYP2C19	cytochrome	cytochrome P450 family 2 subfamily C member 19
hsa00590	Lipid metabolism	Arachidonic acid metabolism - Homo sapiens (human)	CYP4F8	cytochrome	cytochrome P450 family 4 subfamily F member 8
hsa00590	Lipid metabolism	Arachidonic acid metabolism - Homo sapiens (human)	ALOX12	arachidonate	arachidonate 12-lipoxygenase, 12S type
hsa00590	Lipid metabolism	Arachidonic acid metabolism - Homo sapiens (human)	ALOXE3	arachidonate	arachidonate epidermal lipoxygenase 3
hsa00590	Lipid metabolism	Arachidonic acid metabolism - Homo sapiens (human)	ALOX12B	arachidonate	arachidonate 12-lipoxygenase, 12R type
hsa00590	Lipid metabolism	Arachidonic acid metabolism - Homo sapiens (human)	ALOX15B	arachidonate	arachidonate 15-lipoxygenase type B
hsa00590	Lipid metabolism	Arachidonic acid metabolism - Homo sapiens (human)	CYP2B6	cytochrome	cytochrome P450 family 2 subfamily B member 6
hsa00590	Lipid metabolism	Arachidonic acid metabolism - Homo sapiens (human)	CYP2C8	cytochrome	cytochrome P450 family 2 subfamily C member 8
hsa00590	Lipid metabolism	Arachidonic acid metabolism - Homo sapiens (human)	CYP2C9	cytochrome	cytochrome P450 family 2 subfamily C member 9
hsa00590	Lipid metabolism	Arachidonic acid metabolism - Homo sapiens (human)	EPHX2	epoxide	epoxide hydrolase 2
hsa00590	Lipid metabolism	Arachidonic acid metabolism - Homo sapiens (human)	ALOX15	arachidonate	arachidonate 15-lipoxygenase
hsa00591	Lipid metabolism	Linoleic acid metabolism - Homo sapiens (human)	PLA2G10	phospholipase	phospholipase A2 group X
hsa00591	Lipid metabolism	Linoleic acid metabolism - Homo sapiens (human)	PLA2G2D	phospholipase	phospholipase A2 group IID
hsa00591	Lipid metabolism	Linoleic acid metabolism - Homo sapiens (human)	PLA2G2E	phospholipase	phospholipase A2 group IIE
hsa00591	Lipid metabolism	Linoleic acid metabolism - Homo sapiens (human)	PLA2G3	phospholipase	phospholipase A2 group III
hsa00591	Lipid metabolism	Linoleic acid metabolism - Homo sapiens (human)	PLA2G2F	phospholipase	phospholipase A2 group IIF
hsa00591	Lipid metabolism	Linoleic acid metabolism - Homo sapiens (human)	PLA2G12A	phospholipase	phospholipase A2 group XIIA
hsa00591	Lipid metabolism	Linoleic acid metabolism - Homo sapiens (human)	PLA2G12B	phospholipase	phospholipase A2 group XIIB
hsa00591	Lipid metabolism	Linoleic acid metabolism - Homo sapiens (human)	PLA2G1B	phospholipase	phospholipase A2 group IB
hsa00591	Lipid metabolism	Linoleic acid metabolism - Homo sapiens (human)	PLA2G5	phospholipase	phospholipase A2 group V
hsa00591	Lipid metabolism	Linoleic acid metabolism - Homo sapiens (human)	PLA2G2A	phospholipase	phospholipase A2 group IIA
hsa00591	Lipid metabolism	Linoleic acid metabolism - Homo sapiens (human)	PLA2G2C	phospholipase	phospholipase A2 group IIC
hsa00591	Lipid metabolism	Linoleic acid metabolism - Homo sapiens (human)	PLA2G4E	phospholipase	phospholipase A2 group IVE
hsa00591	Lipid metabolism	Linoleic acid metabolism - Homo sapiens (human)	PLA2G4A	phospholipase	phospholipase A2 group IVA
hsa00591	Lipid metabolism	Linoleic acid metabolism - Homo sapiens (human)	JMJD7-PLA2G4B	JMJD7-PLA2G4B	JMJD7-PLA2G4B readthrough
hsa00591	Lipid metabolism	Linoleic acid metabolism - Homo sapiens (human)	PLA2G4B	phospholipase	phospholipase A2 group IVB
hsa00591	Lipid metabolism	Linoleic acid metabolism - Homo sapiens (human)	PLA2G4C	phospholipase	phospholipase A2 group IVC
hsa00591	Lipid metabolism	Linoleic acid metabolism - Homo sapiens (human)	PLA2G4D	phospholipase	phospholipase A2 group IVD
hsa00591	Lipid metabolism	Linoleic acid metabolism - Homo sapiens (human)	PLA2G4F	phospholipase	phospholipase A2 group IVF
hsa00591	Lipid metabolism	Linoleic acid metabolism - Homo sapiens (human)	PLA2G6	phospholipase	phospholipase A2 group VI
hsa00591	Lipid metabolism	Linoleic acid metabolism - Homo sapiens (human)	PLB1	phospholipase	phospholipase B1
hsa00591	Lipid metabolism	Linoleic acid metabolism - Homo sapiens (human)	PLA2G16	phospholipase	phospholipase A and acyltransferase 3
hsa00591	Lipid metabolism	Linoleic acid metabolism - Homo sapiens (human)	HRASLS2	phospholipase	phospholipase A and acyltransferase 2
hsa00591	Lipid metabolism	Linoleic acid metabolism - Homo sapiens (human)	ALOX15	arachidonate	arachidonate 15-lipoxygenase
hsa00591	Lipid metabolism	Linoleic acid metabolism - Homo sapiens (human)	CYP1A2	cytochrome	cytochrome P450 family 1 subfamily A member 2
hsa00591	Lipid metabolism	Linoleic acid metabolism - Homo sapiens (human)	CYP2C8	cytochrome	cytochrome P450 family 2 subfamily C member 8
hsa00591	Lipid metabolism	Linoleic acid metabolism - Homo sapiens (human)	CYP2C9	cytochrome	cytochrome P450 family 2 subfamily C member 9
hsa00591	Lipid metabolism	Linoleic acid metabolism - Homo sapiens (human)	CYP2C19	cytochrome	cytochrome P450 family 2 subfamily C member 19
hsa00591	Lipid metabolism	Linoleic acid metabolism - Homo sapiens (human)	CYP2J2	cytochrome	cytochrome P450 family 2 subfamily J member 2
hsa00591	Lipid metabolism	Linoleic acid metabolism - Homo sapiens (human)	CYP2E1	cytochrome	cytochrome P450 family 2 subfamily E member 1
hsa00591	Lipid metabolism	Linoleic acid metabolism - Homo sapiens (human)	CYP3A4	cytochrome	cytochrome P450 family 3 subfamily A member 4
hsa00592	Lipid metabolism	alpha-Linolenic acid metabolism - Homo sapiens (human)	PLA2G10	phospholipase	phospholipase A2 group X
hsa00592	Lipid metabolism	alpha-Linolenic acid metabolism - Homo sapiens (human)	PLA2G2D	phospholipase	phospholipase A2 group IID
hsa00592	Lipid metabolism	alpha-Linolenic acid metabolism - Homo sapiens (human)	PLA2G2E	phospholipase	phospholipase A2 group IIE
hsa00592	Lipid metabolism	alpha-Linolenic acid metabolism - Homo sapiens (human)	PLA2G3	phospholipase	phospholipase A2 group III
hsa00592	Lipid metabolism	alpha-Linolenic acid metabolism - Homo sapiens (human)	PLA2G2F	phospholipase	phospholipase A2 group IIF
hsa00592	Lipid metabolism	alpha-Linolenic acid metabolism - Homo sapiens (human)	PLA2G12A	phospholipase	phospholipase A2 group XIIA
hsa00592	Lipid metabolism	alpha-Linolenic acid metabolism - Homo sapiens (human)	PLA2G12B	phospholipase	phospholipase A2 group XIIB
hsa00592	Lipid metabolism	alpha-Linolenic acid metabolism - Homo sapiens (human)	PLA2G1B	phospholipase	phospholipase A2 group IB
hsa00592	Lipid metabolism	alpha-Linolenic acid metabolism - Homo sapiens (human)	PLA2G5	phospholipase	phospholipase A2 group V
hsa00592	Lipid metabolism	alpha-Linolenic acid metabolism - Homo sapiens (human)	PLA2G2A	phospholipase	phospholipase A2 group IIA
hsa00592	Lipid metabolism	alpha-Linolenic acid metabolism - Homo sapiens (human)	PLA2G2C	phospholipase	phospholipase A2 group IIC
hsa00592	Lipid metabolism	alpha-Linolenic acid metabolism - Homo sapiens (human)	PLA2G4E	phospholipase	phospholipase A2 group IVE
hsa00592	Lipid metabolism	alpha-Linolenic acid metabolism - Homo sapiens (human)	PLA2G4A	phospholipase	phospholipase A2 group IVA
hsa00592	Lipid metabolism	alpha-Linolenic acid metabolism - Homo sapiens (human)	JMJD7-PLA2G4B	JMJD7-PLA2G4B	JMJD7-PLA2G4B readthrough
hsa00592	Lipid metabolism	alpha-Linolenic acid metabolism - Homo sapiens (human)	PLA2G4B	phospholipase	phospholipase A2 group IVB
hsa00592	Lipid metabolism	alpha-Linolenic acid metabolism - Homo sapiens (human)	PLA2G4C	phospholipase	phospholipase A2 group IVC
hsa00592	Lipid metabolism	alpha-Linolenic acid metabolism - Homo sapiens (human)	PLA2G4D	phospholipase	phospholipase A2 group IVD
hsa00592	Lipid metabolism	alpha-Linolenic acid metabolism - Homo sapiens (human)	PLA2G4F	phospholipase	phospholipase A2 group IVF
hsa00592	Lipid metabolism	alpha-Linolenic acid metabolism - Homo sapiens (human)	PLA2G6	phospholipase	phospholipase A2 group VI
hsa00592	Lipid metabolism	alpha-Linolenic acid metabolism - Homo sapiens (human)	PLB1	phospholipase	phospholipase B1
hsa00592	Lipid metabolism	alpha-Linolenic acid metabolism - Homo sapiens (human)	PLA2G16	phospholipase	phospholipase A and acyltransferase 3
hsa00592	Lipid metabolism	alpha-Linolenic acid metabolism - Homo sapiens (human)	HRASLS2	phospholipase	phospholipase A and acyltransferase 2
hsa00592	Lipid metabolism	alpha-Linolenic acid metabolism - Homo sapiens (human)	FADS2	fatty	fatty acid desaturase 2
hsa00592	Lipid metabolism	alpha-Linolenic acid metabolism - Homo sapiens (human)	ACOX3	acyl-CoA	acyl-CoA oxidase 3, pristanoyl
hsa00592	Lipid metabolism	alpha-Linolenic acid metabolism - Homo sapiens (human)	ACOX1	acyl-CoA	acyl-CoA oxidase 1
hsa00592	Lipid metabolism	alpha-Linolenic acid metabolism - Homo sapiens (human)	ACAA1	acetyl-CoA	acetyl-CoA acyltransferase 1
hsa01040	Lipid metabolism	Biosynthesis of unsaturated fatty acids - Homo sapiens (human)	ELOVL1	ELOVL	ELOVL fatty acid elongase 1
hsa01040	Lipid metabolism	Biosynthesis of unsaturated fatty acids - Homo sapiens (human)	ELOVL2	ELOVL	ELOVL fatty acid elongase 2
hsa01040	Lipid metabolism	Biosynthesis of unsaturated fatty acids - Homo sapiens (human)	ELOVL3	ELOVL	ELOVL fatty acid elongase 3
hsa01040	Lipid metabolism	Biosynthesis of unsaturated fatty acids - Homo sapiens (human)	ELOVL4	ELOVL	ELOVL fatty acid elongase 4
hsa01040	Lipid metabolism	Biosynthesis of unsaturated fatty acids - Homo sapiens (human)	ELOVL5	ELOVL	ELOVL fatty acid elongase 5
hsa01040	Lipid metabolism	Biosynthesis of unsaturated fatty acids - Homo sapiens (human)	ELOVL6	ELOVL	ELOVL fatty acid elongase 6
hsa01040	Lipid metabolism	Biosynthesis of unsaturated fatty acids - Homo sapiens (human)	ELOVL7	ELOVL	ELOVL fatty acid elongase 7
hsa01040	Lipid metabolism	Biosynthesis of unsaturated fatty acids - Homo sapiens (human)	HSD17B12	hydroxysteroid	hydroxysteroid 17-beta dehydrogenase 12
hsa01040	Lipid metabolism	Biosynthesis of unsaturated fatty acids - Homo sapiens (human)	HACD2	3-hydroxyacyl-CoA	3-hydroxyacyl-CoA dehydratase 2
hsa01040	Lipid metabolism	Biosynthesis of unsaturated fatty acids - Homo sapiens (human)	HACD1	3-hydroxyacyl-CoA	3-hydroxyacyl-CoA dehydratase 1
hsa01040	Lipid metabolism	Biosynthesis of unsaturated fatty acids - Homo sapiens (human)	HACD4	3-hydroxyacyl-CoA	3-hydroxyacyl-CoA dehydratase 4
hsa01040	Lipid metabolism	Biosynthesis of unsaturated fatty acids - Homo sapiens (human)	HACD3	3-hydroxyacyl-CoA	3-hydroxyacyl-CoA dehydratase 3
hsa01040	Lipid metabolism	Biosynthesis of unsaturated fatty acids - Homo sapiens (human)	TECR	trans-2,3-enoyl-CoA	trans-2,3-enoyl-CoA reductase
hsa01040	Lipid metabolism	Biosynthesis of unsaturated fatty acids - Homo sapiens (human)	SCD	stearoyl-CoA	stearoyl-CoA desaturase
hsa01040	Lipid metabolism	Biosynthesis of unsaturated fatty acids - Homo sapiens (human)	SCD5	stearoyl-CoA	stearoyl-CoA desaturase 5
hsa01040	Lipid metabolism	Biosynthesis of unsaturated fatty acids - Homo sapiens (human)	FADS2	fatty	fatty acid desaturase 2
hsa01040	Lipid metabolism	Biosynthesis of unsaturated fatty acids - Homo sapiens (human)	FADS1	fatty	fatty acid desaturase 1
hsa01040	Lipid metabolism	Biosynthesis of unsaturated fatty acids - Homo sapiens (human)	ACOX3	acyl-CoA	acyl-CoA oxidase 3, pristanoyl
hsa01040	Lipid metabolism	Biosynthesis of unsaturated fatty acids - Homo sapiens (human)	ACOX1	acyl-CoA	acyl-CoA oxidase 1
hsa01040	Lipid metabolism	Biosynthesis of unsaturated fatty acids - Homo sapiens (human)	HSD17B4	hydroxysteroid	hydroxysteroid 17-beta dehydrogenase 4
hsa01040	Lipid metabolism	Biosynthesis of unsaturated fatty acids - Homo sapiens (human)	ACAA1	acetyl-CoA	acetyl-CoA acyltransferase 1
hsa01040	Lipid metabolism	Biosynthesis of unsaturated fatty acids - Homo sapiens (human)	SCP2	sterol	sterol carrier protein 2
hsa01040	Lipid metabolism	Biosynthesis of unsaturated fatty acids - Homo sapiens (human)	ACOT4	acyl-CoA	acyl-CoA thioesterase 4
hsa01040	Lipid metabolism	Biosynthesis of unsaturated fatty acids - Homo sapiens (human)	ACOT2	acyl-CoA	acyl-CoA thioesterase 2
hsa01040	Lipid metabolism	Biosynthesis of unsaturated fatty acids - Homo sapiens (human)	ACOT1	acyl-CoA	acyl-CoA thioesterase 1
hsa01040	Lipid metabolism	Biosynthesis of unsaturated fatty acids - Homo sapiens (human)	ACOT7	acyl-CoA	acyl-CoA thioesterase 7
hsa01040	Lipid metabolism	Biosynthesis of unsaturated fatty acids - Homo sapiens (human)	BAAT	bile	bile acid-CoA:amino acid N-acyltransferase
hsa00230	Nucleotide metabolism	Purine metabolism - Homo sapiens (human)	NUDT9	nudix	nudix hydrolase 9
hsa00230	Nucleotide metabolism	Purine metabolism - Homo sapiens (human)	ADPRM	ADP-ribose/CDP-alcohol	ADP-ribose/CDP-alcohol diphosphatase, manganese dependent
hsa00230	Nucleotide metabolism	Purine metabolism - Homo sapiens (human)	NUDT5	nudix	nudix hydrolase 5
hsa00230	Nucleotide metabolism	Purine metabolism - Homo sapiens (human)	PGM1	phosphoglucomutase	phosphoglucomutase 1
hsa00230	Nucleotide metabolism	Purine metabolism - Homo sapiens (human)	PGM2	phosphoglucomutase	phosphoglucomutase 2
hsa00230	Nucleotide metabolism	Purine metabolism - Homo sapiens (human)	PRPS1L1	phosphoribosyl	phosphoribosyl pyrophosphate synthetase 1 like 1
hsa00230	Nucleotide metabolism	Purine metabolism - Homo sapiens (human)	PRPS2	phosphoribosyl	phosphoribosyl pyrophosphate synthetase 2
hsa00230	Nucleotide metabolism	Purine metabolism - Homo sapiens (human)	PRPS1	phosphoribosyl	phosphoribosyl pyrophosphate synthetase 1
hsa00230	Nucleotide metabolism	Purine metabolism - Homo sapiens (human)	PPAT	phosphoribosyl	phosphoribosyl pyrophosphate amidotransferase
hsa00230	Nucleotide metabolism	Purine metabolism - Homo sapiens (human)	GART	phosphoribosylglycinamide	phosphoribosylglycinamide formyltransferase, phosphoribosylglycinamide synthetase, phosphoribosylaminoimidazole synthetase
hsa00230	Nucleotide metabolism	Purine metabolism - Homo sapiens (human)	PFAS	phosphoribosylformylglycinamidine	phosphoribosylformylglycinamidine synthase
hsa00230	Nucleotide metabolism	Purine metabolism - Homo sapiens (human)	PAICS	phosphoribosylaminoimidazole	phosphoribosylaminoimidazole carboxylase and phosphoribosylaminoimidazolesuccinocarboxamide synthase
hsa00230	Nucleotide metabolism	Purine metabolism - Homo sapiens (human)	ADSL	adenylosuccinate	adenylosuccinate lyase
hsa00230	Nucleotide metabolism	Purine metabolism - Homo sapiens (human)	ATIC	5-aminoimidazole-4-carboxamide	5-aminoimidazole-4-carboxamide ribonucleotide formyltransferase/IMP cyclohydrolase
hsa00230	Nucleotide metabolism	Purine metabolism - Homo sapiens (human)	APRT	adenine	adenine phosphoribosyltransferase
hsa00230	Nucleotide metabolism	Purine metabolism - Homo sapiens (human)	NT5C2	5'-nucleotidase,	5'-nucleotidase, cytosolic II
hsa00230	Nucleotide metabolism	Purine metabolism - Homo sapiens (human)	NT5C1A	5'-nucleotidase,	5'-nucleotidase, cytosolic IA
hsa00230	Nucleotide metabolism	Purine metabolism - Homo sapiens (human)	NT5C1B	5'-nucleotidase,	5'-nucleotidase, cytosolic IB
hsa00230	Nucleotide metabolism	Purine metabolism - Homo sapiens (human)	NT5C	5',	5', 3'-nucleotidase, cytosolic
hsa00230	Nucleotide metabolism	Purine metabolism - Homo sapiens (human)	NT5M	5',3'-nucleotidase,	5',3'-nucleotidase, mitochondrial
hsa00230	Nucleotide metabolism	Purine metabolism - Homo sapiens (human)	NT5C1B-RDH14	NT5C1B-RDH14	NT5C1B-RDH14 readthrough
hsa00230	Nucleotide metabolism	Purine metabolism - Homo sapiens (human)	NT5DC4	5'-nucleotidase	5'-nucleotidase domain containing 4
hsa00230	Nucleotide metabolism	Purine metabolism - Homo sapiens (human)	NT5E	5'-nucleotidase	5'-nucleotidase ecto
hsa00230	Nucleotide metabolism	Purine metabolism - Homo sapiens (human)	PNP	purine	purine nucleoside phosphorylase
hsa00230	Nucleotide metabolism	Purine metabolism - Homo sapiens (human)	LACC1	laccase	laccase domain containing 1
hsa00230	Nucleotide metabolism	Purine metabolism - Homo sapiens (human)	HPRT1	hypoxanthine	hypoxanthine phosphoribosyltransferase 1
hsa00230	Nucleotide metabolism	Purine metabolism - Homo sapiens (human)	IMPDH1	inosine	inosine monophosphate dehydrogenase 1
hsa00230	Nucleotide metabolism	Purine metabolism - Homo sapiens (human)	IMPDH2	inosine	inosine monophosphate dehydrogenase 2
hsa00230	Nucleotide metabolism	Purine metabolism - Homo sapiens (human)	NME6	NME/NM23	NME/NM23 nucleoside diphosphate kinase 6
hsa00230	Nucleotide metabolism	Purine metabolism - Homo sapiens (human)	NME7	NME/NM23	NME/NM23 family member 7
hsa00230	Nucleotide metabolism	Purine metabolism - Homo sapiens (human)	NME2	NME/NM23	NME/NM23 nucleoside diphosphate kinase 2
hsa00230	Nucleotide metabolism	Purine metabolism - Homo sapiens (human)	NME4	NME/NM23	NME/NM23 nucleoside diphosphate kinase 4
hsa00230	Nucleotide metabolism	Purine metabolism - Homo sapiens (human)	NME1	NME/NM23	NME/NM23 nucleoside diphosphate kinase 1
hsa00230	Nucleotide metabolism	Purine metabolism - Homo sapiens (human)	NME3	NME/NM23	NME/NM23 nucleoside diphosphate kinase 3
hsa00230	Nucleotide metabolism	Purine metabolism - Homo sapiens (human)	NME1-NME2	NME1-NME2	NME1-NME2 readthrough
hsa00230	Nucleotide metabolism	Purine metabolism - Homo sapiens (human)	AK9	adenylate	adenylate kinase 9
hsa00230	Nucleotide metabolism	Purine metabolism - Homo sapiens (human)	ENTPD3	ectonucleoside	ectonucleoside triphosphate diphosphohydrolase 3
hsa00230	Nucleotide metabolism	Purine metabolism - Homo sapiens (human)	ENTPD8	ectonucleoside	ectonucleoside triphosphate diphosphohydrolase 8
hsa00230	Nucleotide metabolism	Purine metabolism - Homo sapiens (human)	ENTPD1	ectonucleoside	ectonucleoside triphosphate diphosphohydrolase 1
hsa00230	Nucleotide metabolism	Purine metabolism - Homo sapiens (human)	CANT1	calcium	calcium activated nucleotidase 1
hsa00230	Nucleotide metabolism	Purine metabolism - Homo sapiens (human)	ENTPD4	ectonucleoside	ectonucleoside triphosphate diphosphohydrolase 4
hsa00230	Nucleotide metabolism	Purine metabolism - Homo sapiens (human)	ENTPD5	ectonucleoside	ectonucleoside triphosphate diphosphohydrolase 5 (inactive)
hsa00230	Nucleotide metabolism	Purine metabolism - Homo sapiens (human)	ENTPD6	ectonucleoside	ectonucleoside triphosphate diphosphohydrolase 6
hsa00230	Nucleotide metabolism	Purine metabolism - Homo sapiens (human)	NUDT16	nudix	nudix hydrolase 16
hsa00230	Nucleotide metabolism	Purine metabolism - Homo sapiens (human)	ITPA	inosine	inosine triphosphatase
hsa00230	Nucleotide metabolism	Purine metabolism - Homo sapiens (human)	XDH	xanthine	xanthine dehydrogenase
hsa00230	Nucleotide metabolism	Purine metabolism - Homo sapiens (human)	NUDT2	nudix	nudix hydrolase 2
hsa00230	Nucleotide metabolism	Purine metabolism - Homo sapiens (human)	GMPS	guanine	guanine monophosphate synthase
hsa00230	Nucleotide metabolism	Purine metabolism - Homo sapiens (human)	GMPR	guanosine	guanosine monophosphate reductase
hsa00230	Nucleotide metabolism	Purine metabolism - Homo sapiens (human)	GMPR2	guanosine	guanosine monophosphate reductase 2
hsa00230	Nucleotide metabolism	Purine metabolism - Homo sapiens (human)	GDA	guanine	guanine deaminase
hsa00230	Nucleotide metabolism	Purine metabolism - Homo sapiens (human)	GUK1	guanylate	guanylate kinase 1
hsa00230	Nucleotide metabolism	Purine metabolism - Homo sapiens (human)	RRM1	ribonucleotide	ribonucleotide reductase catalytic subunit M1
hsa00230	Nucleotide metabolism	Purine metabolism - Homo sapiens (human)	RRM2B	ribonucleotide	ribonucleotide reductase regulatory TP53 inducible subunit M2B
hsa00230	Nucleotide metabolism	Purine metabolism - Homo sapiens (human)	RRM2	ribonucleotide	ribonucleotide reductase regulatory subunit M2
hsa00230	Nucleotide metabolism	Purine metabolism - Homo sapiens (human)	HDDC2	HD	HD domain containing 2
hsa00230	Nucleotide metabolism	Purine metabolism - Homo sapiens (human)	DGUOK	deoxyguanosine	deoxyguanosine kinase
hsa00230	Nucleotide metabolism	Purine metabolism - Homo sapiens (human)	DCK	deoxycytidine	deoxycytidine kinase
hsa00230	Nucleotide metabolism	Purine metabolism - Homo sapiens (human)	HDDC3	HD	HD domain containing 3
hsa00230	Nucleotide metabolism	Purine metabolism - Homo sapiens (human)	PRUNE	prune	prune exopolyphosphatase 1
hsa00230	Nucleotide metabolism	Purine metabolism - Homo sapiens (human)	ADCY1	adenylate	adenylate cyclase 1
hsa00230	Nucleotide metabolism	Purine metabolism - Homo sapiens (human)	ADCY2	adenylate	adenylate cyclase 2
hsa00230	Nucleotide metabolism	Purine metabolism - Homo sapiens (human)	ADCY3	adenylate	adenylate cyclase 3
hsa00230	Nucleotide metabolism	Purine metabolism - Homo sapiens (human)	ADCY4	adenylate	adenylate cyclase 4
hsa00230	Nucleotide metabolism	Purine metabolism - Homo sapiens (human)	ADCY5	adenylate	adenylate cyclase 5
hsa00230	Nucleotide metabolism	Purine metabolism - Homo sapiens (human)	ADCY6	adenylate	adenylate cyclase 6
hsa00230	Nucleotide metabolism	Purine metabolism - Homo sapiens (human)	ADCY7	adenylate	adenylate cyclase 7
hsa00230	Nucleotide metabolism	Purine metabolism - Homo sapiens (human)	ADCY8	adenylate	adenylate cyclase 8
hsa00230	Nucleotide metabolism	Purine metabolism - Homo sapiens (human)	ADCY9	adenylate	adenylate cyclase 9
hsa00230	Nucleotide metabolism	Purine metabolism - Homo sapiens (human)	ADCY10	adenylate	adenylate cyclase 10
hsa00230	Nucleotide metabolism	Purine metabolism - Homo sapiens (human)	GUCY1A2	guanylate	guanylate cyclase 1 soluble subunit alpha 2
hsa00230	Nucleotide metabolism	Purine metabolism - Homo sapiens (human)	GUCY1A3	guanylate	guanylate cyclase 1 soluble subunit alpha 1
hsa00230	Nucleotide metabolism	Purine metabolism - Homo sapiens (human)	GUCY1B3	guanylate	guanylate cyclase 1 soluble subunit beta 1
hsa00230	Nucleotide metabolism	Purine metabolism - Homo sapiens (human)	GUCY2C	guanylate	guanylate cyclase 2C
hsa00230	Nucleotide metabolism	Purine metabolism - Homo sapiens (human)	GUCY2D	guanylate	guanylate cyclase 2D, retinal
hsa00230	Nucleotide metabolism	Purine metabolism - Homo sapiens (human)	GUCY2F	guanylate	guanylate cyclase 2F, retinal
hsa00230	Nucleotide metabolism	Purine metabolism - Homo sapiens (human)	NPR1	natriuretic	natriuretic peptide receptor 1
hsa00230	Nucleotide metabolism	Purine metabolism - Homo sapiens (human)	NPR2	natriuretic	natriuretic peptide receptor 2
hsa00230	Nucleotide metabolism	Purine metabolism - Homo sapiens (human)	PDE1A	phosphodiesterase	phosphodiesterase 1A
hsa00230	Nucleotide metabolism	Purine metabolism - Homo sapiens (human)	PDE1B	phosphodiesterase	phosphodiesterase 1B
hsa00230	Nucleotide metabolism	Purine metabolism - Homo sapiens (human)	PDE1C	phosphodiesterase	phosphodiesterase 1C
hsa00230	Nucleotide metabolism	Purine metabolism - Homo sapiens (human)	PDE2A	phosphodiesterase	phosphodiesterase 2A
hsa00230	Nucleotide metabolism	Purine metabolism - Homo sapiens (human)	PDE3A	phosphodiesterase	phosphodiesterase 3A
hsa00230	Nucleotide metabolism	Purine metabolism - Homo sapiens (human)	PDE3B	phosphodiesterase	phosphodiesterase 3B
hsa00230	Nucleotide metabolism	Purine metabolism - Homo sapiens (human)	PDE5A	phosphodiesterase	phosphodiesterase 5A
hsa00230	Nucleotide metabolism	Purine metabolism - Homo sapiens (human)	PDE6A	phosphodiesterase	phosphodiesterase 6A
hsa00230	Nucleotide metabolism	Purine metabolism - Homo sapiens (human)	PDE6B	phosphodiesterase	phosphodiesterase 6B
hsa00230	Nucleotide metabolism	Purine metabolism - Homo sapiens (human)	PDE6C	phosphodiesterase	phosphodiesterase 6C
hsa00230	Nucleotide metabolism	Purine metabolism - Homo sapiens (human)	PDE6D	phosphodiesterase	phosphodiesterase 6D
hsa00230	Nucleotide metabolism	Purine metabolism - Homo sapiens (human)	PDE6G	phosphodiesterase	phosphodiesterase 6G
hsa00230	Nucleotide metabolism	Purine metabolism - Homo sapiens (human)	PDE6H	phosphodiesterase	phosphodiesterase 6H
hsa00230	Nucleotide metabolism	Purine metabolism - Homo sapiens (human)	PDE9A	phosphodiesterase	phosphodiesterase 9A
hsa00230	Nucleotide metabolism	Purine metabolism - Homo sapiens (human)	PDE10A	phosphodiesterase	phosphodiesterase 10A
hsa00230	Nucleotide metabolism	Purine metabolism - Homo sapiens (human)	PDE11A	phosphodiesterase	phosphodiesterase 11A
hsa00230	Nucleotide metabolism	Purine metabolism - Homo sapiens (human)	ADSSL1	adenylosuccinate	adenylosuccinate synthase 1
hsa00230	Nucleotide metabolism	Purine metabolism - Homo sapiens (human)	ADSS	adenylosuccinate	adenylosuccinate synthase 2
hsa00230	Nucleotide metabolism	Purine metabolism - Homo sapiens (human)	AMPD2	adenosine	adenosine monophosphate deaminase 2
hsa00230	Nucleotide metabolism	Purine metabolism - Homo sapiens (human)	AMPD3	adenosine	adenosine monophosphate deaminase 3
hsa00230	Nucleotide metabolism	Purine metabolism - Homo sapiens (human)	AMPD1	adenosine	adenosine monophosphate deaminase 1
hsa00230	Nucleotide metabolism	Purine metabolism - Homo sapiens (human)	ADK	adenosine	adenosine kinase
hsa00230	Nucleotide metabolism	Purine metabolism - Homo sapiens (human)	ADA	adenosine	adenosine deaminase
hsa00230	Nucleotide metabolism	Purine metabolism - Homo sapiens (human)	CECR1	adenosine	adenosine deaminase 2
hsa00230	Nucleotide metabolism	Purine metabolism - Homo sapiens (human)	AK7	adenylate	adenylate kinase 7
hsa00230	Nucleotide metabolism	Purine metabolism - Homo sapiens (human)	AK4	adenylate	adenylate kinase 4
hsa00230	Nucleotide metabolism	Purine metabolism - Homo sapiens (human)	AK5	adenylate	adenylate kinase 5
hsa00230	Nucleotide metabolism	Purine metabolism - Homo sapiens (human)	AK2	adenylate	adenylate kinase 2
hsa00230	Nucleotide metabolism	Purine metabolism - Homo sapiens (human)	AK1	adenylate	adenylate kinase 1
hsa00230	Nucleotide metabolism	Purine metabolism - Homo sapiens (human)	AK8	adenylate	adenylate kinase 8
hsa00230	Nucleotide metabolism	Purine metabolism - Homo sapiens (human)	AK6	adenylate	adenylate kinase 6
hsa00230	Nucleotide metabolism	Purine metabolism - Homo sapiens (human)	AK3	adenylate	adenylate kinase 3
hsa00230	Nucleotide metabolism	Purine metabolism - Homo sapiens (human)	ENTPD2	ectonucleoside	ectonucleoside triphosphate diphosphohydrolase 2
hsa00230	Nucleotide metabolism	Purine metabolism - Homo sapiens (human)	NTPCR	nucleoside-triphosphatase,	nucleoside-triphosphatase, cancer-related
hsa00230	Nucleotide metabolism	Purine metabolism - Homo sapiens (human)	ENPP1	ectonucleotide	ectonucleotide pyrophosphatase/phosphodiesterase 1
hsa00230	Nucleotide metabolism	Purine metabolism - Homo sapiens (human)	ENPP3	ectonucleotide	ectonucleotide pyrophosphatase/phosphodiesterase 3
hsa00230	Nucleotide metabolism	Purine metabolism - Homo sapiens (human)	PDE4A	phosphodiesterase	phosphodiesterase 4A
hsa00230	Nucleotide metabolism	Purine metabolism - Homo sapiens (human)	PDE4B	phosphodiesterase	phosphodiesterase 4B
hsa00230	Nucleotide metabolism	Purine metabolism - Homo sapiens (human)	PDE4C	phosphodiesterase	phosphodiesterase 4C
hsa00230	Nucleotide metabolism	Purine metabolism - Homo sapiens (human)	PDE4D	phosphodiesterase	phosphodiesterase 4D
hsa00230	Nucleotide metabolism	Purine metabolism - Homo sapiens (human)	PDE7A	phosphodiesterase	phosphodiesterase 7A
hsa00230	Nucleotide metabolism	Purine metabolism - Homo sapiens (human)	PDE7B	phosphodiesterase	phosphodiesterase 7B
hsa00230	Nucleotide metabolism	Purine metabolism - Homo sapiens (human)	PDE8B	phosphodiesterase	phosphodiesterase 8B
hsa00230	Nucleotide metabolism	Purine metabolism - Homo sapiens (human)	PDE8A	phosphodiesterase	phosphodiesterase 8A
hsa00230	Nucleotide metabolism	Purine metabolism - Homo sapiens (human)	FHIT	fragile	fragile histidine triad diadenosine triphosphatase
hsa00230	Nucleotide metabolism	Purine metabolism - Homo sapiens (human)	ENPP4	ectonucleotide	ectonucleotide pyrophosphatase/phosphodiesterase 4
hsa00230	Nucleotide metabolism	Purine metabolism - Homo sapiens (human)	PAPSS2	3'-phosphoadenosine	3'-phosphoadenosine 5'-phosphosulfate synthase 2
hsa00230	Nucleotide metabolism	Purine metabolism - Homo sapiens (human)	PAPSS1	3'-phosphoadenosine	3'-phosphoadenosine 5'-phosphosulfate synthase 1
hsa00230	Nucleotide metabolism	Purine metabolism - Homo sapiens (human)	URAD	ureidoimidazoline	ureidoimidazoline (2-oxo-4-hydroxy-4-carboxy-5-) decarboxylase
hsa00230	Nucleotide metabolism	Purine metabolism - Homo sapiens (human)	ALLC	allantoicase	allantoicase
hsa00240	Nucleotide metabolism	Pyrimidine metabolism - Homo sapiens (human)	CAD	carbamoyl-phosphate	carbamoyl-phosphate synthetase 2, aspartate transcarbamylase, and dihydroorotase
hsa00240	Nucleotide metabolism	Pyrimidine metabolism - Homo sapiens (human)	DHODH	dihydroorotate	dihydroorotate dehydrogenase (quinone)
hsa00240	Nucleotide metabolism	Pyrimidine metabolism - Homo sapiens (human)	UMPS	uridine	uridine monophosphate synthetase
hsa00240	Nucleotide metabolism	Pyrimidine metabolism - Homo sapiens (human)	CMPK1	cytidine/uridine	cytidine/uridine monophosphate kinase 1
hsa00240	Nucleotide metabolism	Pyrimidine metabolism - Homo sapiens (human)	CMPK2	cytidine/uridine	cytidine/uridine monophosphate kinase 2
hsa00240	Nucleotide metabolism	Pyrimidine metabolism - Homo sapiens (human)	NME6	NME/NM23	NME/NM23 nucleoside diphosphate kinase 6
hsa00240	Nucleotide metabolism	Pyrimidine metabolism - Homo sapiens (human)	NME7	NME/NM23	NME/NM23 family member 7
hsa00240	Nucleotide metabolism	Pyrimidine metabolism - Homo sapiens (human)	NME2	NME/NM23	NME/NM23 nucleoside diphosphate kinase 2
hsa00240	Nucleotide metabolism	Pyrimidine metabolism - Homo sapiens (human)	NME4	NME/NM23	NME/NM23 nucleoside diphosphate kinase 4
hsa00240	Nucleotide metabolism	Pyrimidine metabolism - Homo sapiens (human)	NME1	NME/NM23	NME/NM23 nucleoside diphosphate kinase 1
hsa00240	Nucleotide metabolism	Pyrimidine metabolism - Homo sapiens (human)	NME3	NME/NM23	NME/NM23 nucleoside diphosphate kinase 3
hsa00240	Nucleotide metabolism	Pyrimidine metabolism - Homo sapiens (human)	NME1-NME2	NME1-NME2	NME1-NME2 readthrough
hsa00240	Nucleotide metabolism	Pyrimidine metabolism - Homo sapiens (human)	AK9	adenylate	adenylate kinase 9
hsa00240	Nucleotide metabolism	Pyrimidine metabolism - Homo sapiens (human)	ENTPD3	ectonucleoside	ectonucleoside triphosphate diphosphohydrolase 3
hsa00240	Nucleotide metabolism	Pyrimidine metabolism - Homo sapiens (human)	ENTPD8	ectonucleoside	ectonucleoside triphosphate diphosphohydrolase 8
hsa00240	Nucleotide metabolism	Pyrimidine metabolism - Homo sapiens (human)	ENTPD1	ectonucleoside	ectonucleoside triphosphate diphosphohydrolase 1
hsa00240	Nucleotide metabolism	Pyrimidine metabolism - Homo sapiens (human)	CANT1	calcium	calcium activated nucleotidase 1
hsa00240	Nucleotide metabolism	Pyrimidine metabolism - Homo sapiens (human)	ENTPD4	ectonucleoside	ectonucleoside triphosphate diphosphohydrolase 4
hsa00240	Nucleotide metabolism	Pyrimidine metabolism - Homo sapiens (human)	ENTPD5	ectonucleoside	ectonucleoside triphosphate diphosphohydrolase 5 (inactive)
hsa00240	Nucleotide metabolism	Pyrimidine metabolism - Homo sapiens (human)	ENTPD6	ectonucleoside	ectonucleoside triphosphate diphosphohydrolase 6
hsa00240	Nucleotide metabolism	Pyrimidine metabolism - Homo sapiens (human)	ENPP1	ectonucleotide	ectonucleotide pyrophosphatase/phosphodiesterase 1
hsa00240	Nucleotide metabolism	Pyrimidine metabolism - Homo sapiens (human)	ENPP3	ectonucleotide	ectonucleotide pyrophosphatase/phosphodiesterase 3
hsa00240	Nucleotide metabolism	Pyrimidine metabolism - Homo sapiens (human)	ASMTL	acetylserotonin	acetylserotonin O-methyltransferase like
hsa00240	Nucleotide metabolism	Pyrimidine metabolism - Homo sapiens (human)	NUDT2	nudix	nudix hydrolase 2
hsa00240	Nucleotide metabolism	Pyrimidine metabolism - Homo sapiens (human)	CTPS1	CTP	CTP synthase 1
hsa00240	Nucleotide metabolism	Pyrimidine metabolism - Homo sapiens (human)	CTPS2	CTP	CTP synthase 2
hsa00240	Nucleotide metabolism	Pyrimidine metabolism - Homo sapiens (human)	UCK1	uridine-cytidine	uridine-cytidine kinase 1
hsa00240	Nucleotide metabolism	Pyrimidine metabolism - Homo sapiens (human)	UCK2	uridine-cytidine	uridine-cytidine kinase 2
hsa00240	Nucleotide metabolism	Pyrimidine metabolism - Homo sapiens (human)	UCKL1	uridine-cytidine	uridine-cytidine kinase 1 like 1
hsa00240	Nucleotide metabolism	Pyrimidine metabolism - Homo sapiens (human)	NT5C2	5'-nucleotidase,	5'-nucleotidase, cytosolic II
hsa00240	Nucleotide metabolism	Pyrimidine metabolism - Homo sapiens (human)	NT5C1A	5'-nucleotidase,	5'-nucleotidase, cytosolic IA
hsa00240	Nucleotide metabolism	Pyrimidine metabolism - Homo sapiens (human)	NT5C1B	5'-nucleotidase,	5'-nucleotidase, cytosolic IB
hsa00240	Nucleotide metabolism	Pyrimidine metabolism - Homo sapiens (human)	NT5C	5',	5', 3'-nucleotidase, cytosolic
hsa00240	Nucleotide metabolism	Pyrimidine metabolism - Homo sapiens (human)	NT5M	5',3'-nucleotidase,	5',3'-nucleotidase, mitochondrial
hsa00240	Nucleotide metabolism	Pyrimidine metabolism - Homo sapiens (human)	NT5C1B-RDH14	NT5C1B-RDH14	NT5C1B-RDH14 readthrough
hsa00240	Nucleotide metabolism	Pyrimidine metabolism - Homo sapiens (human)	NT5DC4	5'-nucleotidase	5'-nucleotidase domain containing 4
hsa00240	Nucleotide metabolism	Pyrimidine metabolism - Homo sapiens (human)	NT5E	5'-nucleotidase	5'-nucleotidase ecto
hsa00240	Nucleotide metabolism	Pyrimidine metabolism - Homo sapiens (human)	UPP2	uridine	uridine phosphorylase 2
hsa00240	Nucleotide metabolism	Pyrimidine metabolism - Homo sapiens (human)	UPP1	uridine	uridine phosphorylase 1
hsa00240	Nucleotide metabolism	Pyrimidine metabolism - Homo sapiens (human)	NT5C3A	5'-nucleotidase,	5'-nucleotidase, cytosolic IIIA
hsa00240	Nucleotide metabolism	Pyrimidine metabolism - Homo sapiens (human)	NT5C3B	5'-nucleotidase,	5'-nucleotidase, cytosolic IIIB
hsa00240	Nucleotide metabolism	Pyrimidine metabolism - Homo sapiens (human)	CDA	cytidine	cytidine deaminase
hsa00240	Nucleotide metabolism	Pyrimidine metabolism - Homo sapiens (human)	RRM1	ribonucleotide	ribonucleotide reductase catalytic subunit M1
hsa00240	Nucleotide metabolism	Pyrimidine metabolism - Homo sapiens (human)	RRM2B	ribonucleotide	ribonucleotide reductase regulatory TP53 inducible subunit M2B
hsa00240	Nucleotide metabolism	Pyrimidine metabolism - Homo sapiens (human)	RRM2	ribonucleotide	ribonucleotide reductase regulatory subunit M2
hsa00240	Nucleotide metabolism	Pyrimidine metabolism - Homo sapiens (human)	DCTPP1	dCTP	dCTP pyrophosphatase 1
hsa00240	Nucleotide metabolism	Pyrimidine metabolism - Homo sapiens (human)	HDDC2	HD	HD domain containing 2
hsa00240	Nucleotide metabolism	Pyrimidine metabolism - Homo sapiens (human)	DCK	deoxycytidine	deoxycytidine kinase
hsa00240	Nucleotide metabolism	Pyrimidine metabolism - Homo sapiens (human)	DCTD	dCMP	dCMP deaminase
hsa00240	Nucleotide metabolism	Pyrimidine metabolism - Homo sapiens (human)	DTYMK	deoxythymidylate	deoxythymidylate kinase
hsa00240	Nucleotide metabolism	Pyrimidine metabolism - Homo sapiens (human)	DUT	deoxyuridine	deoxyuridine triphosphatase
hsa00240	Nucleotide metabolism	Pyrimidine metabolism - Homo sapiens (human)	TYMP	thymidine	thymidine phosphorylase
hsa00240	Nucleotide metabolism	Pyrimidine metabolism - Homo sapiens (human)	TK2	thymidine	thymidine kinase 2
hsa00240	Nucleotide metabolism	Pyrimidine metabolism - Homo sapiens (human)	TK1	thymidine	thymidine kinase 1
hsa00240	Nucleotide metabolism	Pyrimidine metabolism - Homo sapiens (human)	TYMS	thymidylate	thymidylate synthetase
hsa00240	Nucleotide metabolism	Pyrimidine metabolism - Homo sapiens (human)	DPYD	dihydropyrimidine	dihydropyrimidine dehydrogenase
hsa00240	Nucleotide metabolism	Pyrimidine metabolism - Homo sapiens (human)	DPYS	dihydropyrimidinase	dihydropyrimidinase
hsa00240	Nucleotide metabolism	Pyrimidine metabolism - Homo sapiens (human)	UPB1	beta-ureidopropionase	beta-ureidopropionase 1
hsa00250	Amino acid metabolism	Alanine, aspartate and glutamate metabolism - Homo sapiens (human)	GOT1	glutamic-oxaloacetic	glutamic-oxaloacetic transaminase 1
hsa00250	Amino acid metabolism	Alanine, aspartate and glutamate metabolism - Homo sapiens (human)	GOT1L1	glutamic-oxaloacetic	glutamic-oxaloacetic transaminase 1 like 1
hsa00250	Amino acid metabolism	Alanine, aspartate and glutamate metabolism - Homo sapiens (human)	GOT2	glutamic-oxaloacetic	glutamic-oxaloacetic transaminase 2
hsa00250	Amino acid metabolism	Alanine, aspartate and glutamate metabolism - Homo sapiens (human)	IL4I1	interleukin	interleukin 4 induced 1
hsa00250	Amino acid metabolism	Alanine, aspartate and glutamate metabolism - Homo sapiens (human)	DDO	D-aspartate	D-aspartate oxidase
hsa00250	Amino acid metabolism	Alanine, aspartate and glutamate metabolism - Homo sapiens (human)	ASRGL1	asparaginase	asparaginase and isoaspartyl peptidase 1
hsa00250	Amino acid metabolism	Alanine, aspartate and glutamate metabolism - Homo sapiens (human)	ASNS	asparagine	asparagine synthetase (glutamine-hydrolyzing)
hsa00250	Amino acid metabolism	Alanine, aspartate and glutamate metabolism - Homo sapiens (human)	NIT2	nitrilase	nitrilase family member 2
hsa00250	Amino acid metabolism	Alanine, aspartate and glutamate metabolism - Homo sapiens (human)	GPT2	glutamic--pyruvic	glutamic--pyruvic transaminase 2
hsa00250	Amino acid metabolism	Alanine, aspartate and glutamate metabolism - Homo sapiens (human)	GPT	glutamic--pyruvic	glutamic--pyruvic transaminase
hsa00250	Amino acid metabolism	Alanine, aspartate and glutamate metabolism - Homo sapiens (human)	AGXT	alanine--glyoxylate	alanine--glyoxylate aminotransferase
hsa00250	Amino acid metabolism	Alanine, aspartate and glutamate metabolism - Homo sapiens (human)	AGXT2	alanine--glyoxylate	alanine--glyoxylate aminotransferase 2
hsa00250	Amino acid metabolism	Alanine, aspartate and glutamate metabolism - Homo sapiens (human)	ASS1	argininosuccinate	argininosuccinate synthase 1
hsa00250	Amino acid metabolism	Alanine, aspartate and glutamate metabolism - Homo sapiens (human)	ASL	argininosuccinate	argininosuccinate lyase
hsa00250	Amino acid metabolism	Alanine, aspartate and glutamate metabolism - Homo sapiens (human)	ADSSL1	adenylosuccinate	adenylosuccinate synthase 1
hsa00250	Amino acid metabolism	Alanine, aspartate and glutamate metabolism - Homo sapiens (human)	ADSS	adenylosuccinate	adenylosuccinate synthase 2
hsa00250	Amino acid metabolism	Alanine, aspartate and glutamate metabolism - Homo sapiens (human)	ADSL	adenylosuccinate	adenylosuccinate lyase
hsa00250	Amino acid metabolism	Alanine, aspartate and glutamate metabolism - Homo sapiens (human)	NAT8L	N-acetyltransferase	N-acetyltransferase 8 like
hsa00250	Amino acid metabolism	Alanine, aspartate and glutamate metabolism - Homo sapiens (human)	RIMKLB	ribosomal	ribosomal modification protein rimK like family member B
hsa00250	Amino acid metabolism	Alanine, aspartate and glutamate metabolism - Homo sapiens (human)	RIMKLA	ribosomal	ribosomal modification protein rimK like family member A
hsa00250	Amino acid metabolism	Alanine, aspartate and glutamate metabolism - Homo sapiens (human)	FOLH1	folate	folate hydrolase 1
hsa00250	Amino acid metabolism	Alanine, aspartate and glutamate metabolism - Homo sapiens (human)	ASPA	aspartoacylase	aspartoacylase
hsa00250	Amino acid metabolism	Alanine, aspartate and glutamate metabolism - Homo sapiens (human)	GAD1	glutamate	glutamate decarboxylase 1
hsa00250	Amino acid metabolism	Alanine, aspartate and glutamate metabolism - Homo sapiens (human)	GAD2	glutamate	glutamate decarboxylase 2
hsa00250	Amino acid metabolism	Alanine, aspartate and glutamate metabolism - Homo sapiens (human)	ABAT	4-aminobutyrate	4-aminobutyrate aminotransferase
hsa00250	Amino acid metabolism	Alanine, aspartate and glutamate metabolism - Homo sapiens (human)	ALDH5A1	aldehyde	aldehyde dehydrogenase 5 family member A1
hsa00250	Amino acid metabolism	Alanine, aspartate and glutamate metabolism - Homo sapiens (human)	GLUD2	glutamate	glutamate dehydrogenase 2
hsa00250	Amino acid metabolism	Alanine, aspartate and glutamate metabolism - Homo sapiens (human)	GLUD1	glutamate	glutamate dehydrogenase 1
hsa00250	Amino acid metabolism	Alanine, aspartate and glutamate metabolism - Homo sapiens (human)	ALDH4A1	aldehyde	aldehyde dehydrogenase 4 family member A1
hsa00250	Amino acid metabolism	Alanine, aspartate and glutamate metabolism - Homo sapiens (human)	GLUL	glutamate-ammonia	glutamate-ammonia ligase
hsa00250	Amino acid metabolism	Alanine, aspartate and glutamate metabolism - Homo sapiens (human)	CAD	carbamoyl-phosphate	carbamoyl-phosphate synthetase 2, aspartate transcarbamylase, and dihydroorotase
hsa00250	Amino acid metabolism	Alanine, aspartate and glutamate metabolism - Homo sapiens (human)	GLS2	glutaminase	glutaminase 2
hsa00250	Amino acid metabolism	Alanine, aspartate and glutamate metabolism - Homo sapiens (human)	GLS	glutaminase	glutaminase
hsa00250	Amino acid metabolism	Alanine, aspartate and glutamate metabolism - Homo sapiens (human)	CPS1	carbamoyl-phosphate	carbamoyl-phosphate synthase 1
hsa00250	Amino acid metabolism	Alanine, aspartate and glutamate metabolism - Homo sapiens (human)	GFPT2	glutamine-fructose-6-phosphate	glutamine-fructose-6-phosphate transaminase 2
hsa00250	Amino acid metabolism	Alanine, aspartate and glutamate metabolism - Homo sapiens (human)	GFPT1	glutamine--fructose-6-phosphate	glutamine--fructose-6-phosphate transaminase 1
hsa00250	Amino acid metabolism	Alanine, aspartate and glutamate metabolism - Homo sapiens (human)	PPAT	phosphoribosyl	phosphoribosyl pyrophosphate amidotransferase
hsa00260	Amino acid metabolism	Glycine, serine and threonine metabolism - Homo sapiens (human)	SHMT2	serine	serine hydroxymethyltransferase 2
hsa00260	Amino acid metabolism	Glycine, serine and threonine metabolism - Homo sapiens (human)	SHMT1	serine	serine hydroxymethyltransferase 1
hsa00260	Amino acid metabolism	Glycine, serine and threonine metabolism - Homo sapiens (human)	AGXT	alanine--glyoxylate	alanine--glyoxylate aminotransferase
hsa00260	Amino acid metabolism	Glycine, serine and threonine metabolism - Homo sapiens (human)	GRHPR	glyoxylate	glyoxylate and hydroxypyruvate reductase
hsa00260	Amino acid metabolism	Glycine, serine and threonine metabolism - Homo sapiens (human)	GLYCTK	glycerate	glycerate kinase
hsa00260	Amino acid metabolism	Glycine, serine and threonine metabolism - Homo sapiens (human)	PGAM1	phosphoglycerate	phosphoglycerate mutase 1
hsa00260	Amino acid metabolism	Glycine, serine and threonine metabolism - Homo sapiens (human)	PGAM2	phosphoglycerate	phosphoglycerate mutase 2
hsa00260	Amino acid metabolism	Glycine, serine and threonine metabolism - Homo sapiens (human)	PGAM4	phosphoglycerate	phosphoglycerate mutase family member 4
hsa00260	Amino acid metabolism	Glycine, serine and threonine metabolism - Homo sapiens (human)	BPGM	bisphosphoglycerate	bisphosphoglycerate mutase
hsa00260	Amino acid metabolism	Glycine, serine and threonine metabolism - Homo sapiens (human)	PHGDH	phosphoglycerate	phosphoglycerate dehydrogenase
hsa00260	Amino acid metabolism	Glycine, serine and threonine metabolism - Homo sapiens (human)	PSAT1	phosphoserine	phosphoserine aminotransferase 1
hsa00260	Amino acid metabolism	Glycine, serine and threonine metabolism - Homo sapiens (human)	PSPH	phosphoserine	phosphoserine phosphatase
hsa00260	Amino acid metabolism	Glycine, serine and threonine metabolism - Homo sapiens (human)	GCAT	glycine	glycine C-acetyltransferase
hsa00260	Amino acid metabolism	Glycine, serine and threonine metabolism - Homo sapiens (human)	ALAS1	5'-aminolevulinate	5'-aminolevulinate synthase 1
hsa00260	Amino acid metabolism	Glycine, serine and threonine metabolism - Homo sapiens (human)	ALAS2	5'-aminolevulinate	5'-aminolevulinate synthase 2
hsa00260	Amino acid metabolism	Glycine, serine and threonine metabolism - Homo sapiens (human)	MAOB	monoamine	monoamine oxidase B
hsa00260	Amino acid metabolism	Glycine, serine and threonine metabolism - Homo sapiens (human)	MAOA	monoamine	monoamine oxidase A
hsa00260	Amino acid metabolism	Glycine, serine and threonine metabolism - Homo sapiens (human)	AOC3	amine	amine oxidase copper containing 3
hsa00260	Amino acid metabolism	Glycine, serine and threonine metabolism - Homo sapiens (human)	AOC2	amine	amine oxidase copper containing 2
hsa00260	Amino acid metabolism	Glycine, serine and threonine metabolism - Homo sapiens (human)	GLDC	glycine	glycine decarboxylase
hsa00260	Amino acid metabolism	Glycine, serine and threonine metabolism - Homo sapiens (human)	AMT	aminomethyltransferase	aminomethyltransferase
hsa00260	Amino acid metabolism	Glycine, serine and threonine metabolism - Homo sapiens (human)	DLD	dihydrolipoamide	dihydrolipoamide dehydrogenase
hsa00260	Amino acid metabolism	Glycine, serine and threonine metabolism - Homo sapiens (human)	GCSH	glycine	glycine cleavage system protein H
hsa00260	Amino acid metabolism	Glycine, serine and threonine metabolism - Homo sapiens (human)	DAO	D-amino	D-amino acid oxidase
hsa00260	Amino acid metabolism	Glycine, serine and threonine metabolism - Homo sapiens (human)	AGXT2	alanine--glyoxylate	alanine--glyoxylate aminotransferase 2
hsa00260	Amino acid metabolism	Glycine, serine and threonine metabolism - Homo sapiens (human)	GATM	glycine	glycine amidinotransferase
hsa00260	Amino acid metabolism	Glycine, serine and threonine metabolism - Homo sapiens (human)	GAMT	guanidinoacetate	guanidinoacetate N-methyltransferase
hsa00260	Amino acid metabolism	Glycine, serine and threonine metabolism - Homo sapiens (human)	CHDH	choline	choline dehydrogenase
hsa00260	Amino acid metabolism	Glycine, serine and threonine metabolism - Homo sapiens (human)	ALDH7A1	aldehyde	aldehyde dehydrogenase 7 family member A1
hsa00260	Amino acid metabolism	Glycine, serine and threonine metabolism - Homo sapiens (human)	BHMT	betaine--homocysteine	betaine--homocysteine S-methyltransferase
hsa00260	Amino acid metabolism	Glycine, serine and threonine metabolism - Homo sapiens (human)	DMGDH	dimethylglycine	dimethylglycine dehydrogenase
hsa00260	Amino acid metabolism	Glycine, serine and threonine metabolism - Homo sapiens (human)	PIPOX	pipecolic	pipecolic acid and sarcosine oxidase
hsa00260	Amino acid metabolism	Glycine, serine and threonine metabolism - Homo sapiens (human)	SARDH	sarcosine	sarcosine dehydrogenase
hsa00260	Amino acid metabolism	Glycine, serine and threonine metabolism - Homo sapiens (human)	GNMT	glycine	glycine N-methyltransferase
hsa00260	Amino acid metabolism	Glycine, serine and threonine metabolism - Homo sapiens (human)	CBS	cystathionine	cystathionine beta-synthase
hsa00260	Amino acid metabolism	Glycine, serine and threonine metabolism - Homo sapiens (human)	CBS	cystathionine	cystathionine beta-synthase like
hsa00260	Amino acid metabolism	Glycine, serine and threonine metabolism - Homo sapiens (human)	CTH	cystathionine	cystathionine gamma-lyase
hsa00260	Amino acid metabolism	Glycine, serine and threonine metabolism - Homo sapiens (human)	SDS	serine	serine dehydratase
hsa00260	Amino acid metabolism	Glycine, serine and threonine metabolism - Homo sapiens (human)	SDSL	serine	serine dehydratase like
hsa00260	Amino acid metabolism	Glycine, serine and threonine metabolism - Homo sapiens (human)	SRR	serine	serine racemase
hsa00270	Amino acid metabolism	Cysteine and methionine metabolism - Homo sapiens (human)	CTH	cystathionine	cystathionine gamma-lyase
hsa00270	Amino acid metabolism	Cysteine and methionine metabolism - Homo sapiens (human)	CCBL2	kynurenine	kynurenine aminotransferase 3
hsa00270	Amino acid metabolism	Cysteine and methionine metabolism - Homo sapiens (human)	CCBL1	kynurenine	kynurenine aminotransferase 1
hsa00270	Amino acid metabolism	Cysteine and methionine metabolism - Homo sapiens (human)	CBS	cystathionine	cystathionine beta-synthase
hsa00270	Amino acid metabolism	Cysteine and methionine metabolism - Homo sapiens (human)	CBS	cystathionine	cystathionine beta-synthase like
hsa00270	Amino acid metabolism	Cysteine and methionine metabolism - Homo sapiens (human)	BHMT	betaine--homocysteine	betaine--homocysteine S-methyltransferase
hsa00270	Amino acid metabolism	Cysteine and methionine metabolism - Homo sapiens (human)	BHMT2	betaine--homocysteine	betaine--homocysteine S-methyltransferase 2
hsa00270	Amino acid metabolism	Cysteine and methionine metabolism - Homo sapiens (human)	MTR	5-methyltetrahydrofolate-homocysteine	5-methyltetrahydrofolate-homocysteine methyltransferase
hsa00270	Amino acid metabolism	Cysteine and methionine metabolism - Homo sapiens (human)	MAT2B	methionine	methionine adenosyltransferase 2 non-catalytic beta subunit
hsa00270	Amino acid metabolism	Cysteine and methionine metabolism - Homo sapiens (human)	MAT1A	methionine	methionine adenosyltransferase 1A
hsa00270	Amino acid metabolism	Cysteine and methionine metabolism - Homo sapiens (human)	MAT2A	methionine	methionine adenosyltransferase 2A
hsa00270	Amino acid metabolism	Cysteine and methionine metabolism - Homo sapiens (human)	AMD1	adenosylmethionine	adenosylmethionine decarboxylase 1
hsa00270	Amino acid metabolism	Cysteine and methionine metabolism - Homo sapiens (human)	SRM	spermidine	spermidine synthase
hsa00270	Amino acid metabolism	Cysteine and methionine metabolism - Homo sapiens (human)	SMS	spermine	spermine synthase
hsa00270	Amino acid metabolism	Cysteine and methionine metabolism - Homo sapiens (human)	MTAP	methylthioadenosine	methylthioadenosine phosphorylase
hsa00270	Amino acid metabolism	Cysteine and methionine metabolism - Homo sapiens (human)	LACC1	laccase	laccase domain containing 1
hsa00270	Amino acid metabolism	Cysteine and methionine metabolism - Homo sapiens (human)	MRI1	methylthioribose-1-phosphate	methylthioribose-1-phosphate isomerase 1
hsa00270	Amino acid metabolism	Cysteine and methionine metabolism - Homo sapiens (human)	APIP	APAF1	APAF1 interacting protein
hsa00270	Amino acid metabolism	Cysteine and methionine metabolism - Homo sapiens (human)	ENOPH1	enolase-phosphatase	enolase-phosphatase 1
hsa00270	Amino acid metabolism	Cysteine and methionine metabolism - Homo sapiens (human)	ADI1	acireductone	acireductone dioxygenase 1
hsa00270	Amino acid metabolism	Cysteine and methionine metabolism - Homo sapiens (human)	TAT	tyrosine	tyrosine aminotransferase
hsa00270	Amino acid metabolism	Cysteine and methionine metabolism - Homo sapiens (human)	IL4I1	interleukin	interleukin 4 induced 1
hsa00270	Amino acid metabolism	Cysteine and methionine metabolism - Homo sapiens (human)	GNMT	glycine	glycine N-methyltransferase
hsa00270	Amino acid metabolism	Cysteine and methionine metabolism - Homo sapiens (human)	DNMT1	DNA	DNA methyltransferase 1
hsa00270	Amino acid metabolism	Cysteine and methionine metabolism - Homo sapiens (human)	DNMT3A	DNA	DNA methyltransferase 3 alpha
hsa00270	Amino acid metabolism	Cysteine and methionine metabolism - Homo sapiens (human)	DNMT3B	DNA	DNA methyltransferase 3 beta
hsa00270	Amino acid metabolism	Cysteine and methionine metabolism - Homo sapiens (human)	AHCYL2	adenosylhomocysteinase	adenosylhomocysteinase like 2
hsa00270	Amino acid metabolism	Cysteine and methionine metabolism - Homo sapiens (human)	AHCYL1	adenosylhomocysteinase	adenosylhomocysteinase like 1
hsa00270	Amino acid metabolism	Cysteine and methionine metabolism - Homo sapiens (human)	AHCY	adenosylhomocysteinase	adenosylhomocysteinase
hsa00270	Amino acid metabolism	Cysteine and methionine metabolism - Homo sapiens (human)	BCAT2	branched	branched chain amino acid transaminase 2
hsa00270	Amino acid metabolism	Cysteine and methionine metabolism - Homo sapiens (human)	BCAT1	branched	branched chain amino acid transaminase 1
hsa00270	Amino acid metabolism	Cysteine and methionine metabolism - Homo sapiens (human)	AGXT2	alanine--glyoxylate	alanine--glyoxylate aminotransferase 2
hsa00270	Amino acid metabolism	Cysteine and methionine metabolism - Homo sapiens (human)	GCLC	glutamate-cysteine	glutamate-cysteine ligase catalytic subunit
hsa00270	Amino acid metabolism	Cysteine and methionine metabolism - Homo sapiens (human)	GCLM	glutamate-cysteine	glutamate-cysteine ligase modifier subunit
hsa00270	Amino acid metabolism	Cysteine and methionine metabolism - Homo sapiens (human)	GSS	glutathione	glutathione synthetase
hsa00270	Amino acid metabolism	Cysteine and methionine metabolism - Homo sapiens (human)	CDO1	cysteine	cysteine dioxygenase type 1
hsa00270	Amino acid metabolism	Cysteine and methionine metabolism - Homo sapiens (human)	GOT1	glutamic-oxaloacetic	glutamic-oxaloacetic transaminase 1
hsa00270	Amino acid metabolism	Cysteine and methionine metabolism - Homo sapiens (human)	GOT1L1	glutamic-oxaloacetic	glutamic-oxaloacetic transaminase 1 like 1
hsa00270	Amino acid metabolism	Cysteine and methionine metabolism - Homo sapiens (human)	GOT2	glutamic-oxaloacetic	glutamic-oxaloacetic transaminase 2
hsa00270	Amino acid metabolism	Cysteine and methionine metabolism - Homo sapiens (human)	MPST	mercaptopyruvate	mercaptopyruvate sulfurtransferase
hsa00270	Amino acid metabolism	Cysteine and methionine metabolism - Homo sapiens (human)	TST	thiosulfate	thiosulfate sulfurtransferase
hsa00270	Amino acid metabolism	Cysteine and methionine metabolism - Homo sapiens (human)	LDHAL6A	lactate	lactate dehydrogenase A like 6A
hsa00270	Amino acid metabolism	Cysteine and methionine metabolism - Homo sapiens (human)	LDHAL6B	lactate	lactate dehydrogenase A like 6B
hsa00270	Amino acid metabolism	Cysteine and methionine metabolism - Homo sapiens (human)	LDHA	lactate	lactate dehydrogenase A
hsa00270	Amino acid metabolism	Cysteine and methionine metabolism - Homo sapiens (human)	LDHB	lactate	lactate dehydrogenase B
hsa00270	Amino acid metabolism	Cysteine and methionine metabolism - Homo sapiens (human)	LDHC	lactate	lactate dehydrogenase C
hsa00270	Amino acid metabolism	Cysteine and methionine metabolism - Homo sapiens (human)	MDH1	malate	malate dehydrogenase 1
hsa00270	Amino acid metabolism	Cysteine and methionine metabolism - Homo sapiens (human)	MDH2	malate	malate dehydrogenase 2
hsa00270	Amino acid metabolism	Cysteine and methionine metabolism - Homo sapiens (human)	SDS	serine	serine dehydratase
hsa00270	Amino acid metabolism	Cysteine and methionine metabolism - Homo sapiens (human)	SDSL	serine	serine dehydratase like
hsa00270	Amino acid metabolism	Cysteine and methionine metabolism - Homo sapiens (human)	PHGDH	phosphoglycerate	phosphoglycerate dehydrogenase
hsa00270	Amino acid metabolism	Cysteine and methionine metabolism - Homo sapiens (human)	PSAT1	phosphoserine	phosphoserine aminotransferase 1
hsa00280	Amino acid metabolism	Valine, leucine and isoleucine degradation - Homo sapiens (human)	BCAT2	branched	branched chain amino acid transaminase 2
hsa00280	Amino acid metabolism	Valine, leucine and isoleucine degradation - Homo sapiens (human)	BCAT1	branched	branched chain amino acid transaminase 1
hsa00280	Amino acid metabolism	Valine, leucine and isoleucine degradation - Homo sapiens (human)	IL4I1	interleukin	interleukin 4 induced 1
hsa00280	Amino acid metabolism	Valine, leucine and isoleucine degradation - Homo sapiens (human)	BCKDHA	branched	branched chain keto acid dehydrogenase E1 subunit alpha
hsa00280	Amino acid metabolism	Valine, leucine and isoleucine degradation - Homo sapiens (human)	BCKDHB	branched	branched chain keto acid dehydrogenase E1 subunit beta
hsa00280	Amino acid metabolism	Valine, leucine and isoleucine degradation - Homo sapiens (human)	DBT	dihydrolipoamide	dihydrolipoamide branched chain transacylase E2
hsa00280	Amino acid metabolism	Valine, leucine and isoleucine degradation - Homo sapiens (human)	DLD	dihydrolipoamide	dihydrolipoamide dehydrogenase
hsa00280	Amino acid metabolism	Valine, leucine and isoleucine degradation - Homo sapiens (human)	ACADS	acyl-CoA	acyl-CoA dehydrogenase short chain
hsa00280	Amino acid metabolism	Valine, leucine and isoleucine degradation - Homo sapiens (human)	ACADM	acyl-CoA	acyl-CoA dehydrogenase medium chain
hsa00280	Amino acid metabolism	Valine, leucine and isoleucine degradation - Homo sapiens (human)	IVD	isovaleryl-CoA	isovaleryl-CoA dehydrogenase
hsa00280	Amino acid metabolism	Valine, leucine and isoleucine degradation - Homo sapiens (human)	ACADSB	acyl-CoA	acyl-CoA dehydrogenase short/branched chain
hsa00280	Amino acid metabolism	Valine, leucine and isoleucine degradation - Homo sapiens (human)	ACAD8	acyl-CoA	acyl-CoA dehydrogenase family member 8
hsa00280	Amino acid metabolism	Valine, leucine and isoleucine degradation - Homo sapiens (human)	HADHA	hydroxyacyl-CoA	hydroxyacyl-CoA dehydrogenase trifunctional multienzyme complex subunit alpha
hsa00280	Amino acid metabolism	Valine, leucine and isoleucine degradation - Homo sapiens (human)	EHHADH	enoyl-CoA	enoyl-CoA hydratase and 3-hydroxyacyl CoA dehydrogenase
hsa00280	Amino acid metabolism	Valine, leucine and isoleucine degradation - Homo sapiens (human)	ECHS1	enoyl-CoA	enoyl-CoA hydratase, short chain 1
hsa00280	Amino acid metabolism	Valine, leucine and isoleucine degradation - Homo sapiens (human)	HADH	hydroxyacyl-CoA	hydroxyacyl-CoA dehydrogenase
hsa00280	Amino acid metabolism	Valine, leucine and isoleucine degradation - Homo sapiens (human)	HSD17B10	hydroxysteroid	hydroxysteroid 17-beta dehydrogenase 10
hsa00280	Amino acid metabolism	Valine, leucine and isoleucine degradation - Homo sapiens (human)	ACAA1	acetyl-CoA	acetyl-CoA acyltransferase 1
hsa00280	Amino acid metabolism	Valine, leucine and isoleucine degradation - Homo sapiens (human)	ACAA2	acetyl-CoA	acetyl-CoA acyltransferase 2
hsa00280	Amino acid metabolism	Valine, leucine and isoleucine degradation - Homo sapiens (human)	HADHB	hydroxyacyl-CoA	hydroxyacyl-CoA dehydrogenase trifunctional multienzyme complex subunit beta
hsa00280	Amino acid metabolism	Valine, leucine and isoleucine degradation - Homo sapiens (human)	PCCA	propionyl-CoA	propionyl-CoA carboxylase subunit alpha
hsa00280	Amino acid metabolism	Valine, leucine and isoleucine degradation - Homo sapiens (human)	PCCB	propionyl-CoA	propionyl-CoA carboxylase subunit beta
hsa00280	Amino acid metabolism	Valine, leucine and isoleucine degradation - Homo sapiens (human)	MCEE	methylmalonyl-CoA	methylmalonyl-CoA epimerase
hsa00280	Amino acid metabolism	Valine, leucine and isoleucine degradation - Homo sapiens (human)	MUT	methylmalonyl-CoA	methylmalonyl-CoA mutase
hsa00280	Amino acid metabolism	Valine, leucine and isoleucine degradation - Homo sapiens (human)	HIBCH	3-hydroxyisobutyryl-CoA	3-hydroxyisobutyryl-CoA hydrolase
hsa00280	Amino acid metabolism	Valine, leucine and isoleucine degradation - Homo sapiens (human)	HIBADH	3-hydroxyisobutyrate	3-hydroxyisobutyrate dehydrogenase
hsa00280	Amino acid metabolism	Valine, leucine and isoleucine degradation - Homo sapiens (human)	ALDH6A1	aldehyde	aldehyde dehydrogenase 6 family member A1
hsa00280	Amino acid metabolism	Valine, leucine and isoleucine degradation - Homo sapiens (human)	ALDH2	aldehyde	aldehyde dehydrogenase 2 family member
hsa00280	Amino acid metabolism	Valine, leucine and isoleucine degradation - Homo sapiens (human)	ALDH3A2	aldehyde	aldehyde dehydrogenase 3 family member A2
hsa00280	Amino acid metabolism	Valine, leucine and isoleucine degradation - Homo sapiens (human)	ALDH1B1	aldehyde	aldehyde dehydrogenase 1 family member B1
hsa00280	Amino acid metabolism	Valine, leucine and isoleucine degradation - Homo sapiens (human)	ALDH7A1	aldehyde	aldehyde dehydrogenase 7 family member A1
hsa00280	Amino acid metabolism	Valine, leucine and isoleucine degradation - Homo sapiens (human)	ALDH9A1	aldehyde	aldehyde dehydrogenase 9 family member A1
hsa00280	Amino acid metabolism	Valine, leucine and isoleucine degradation - Homo sapiens (human)	AOX1	aldehyde	aldehyde oxidase 1
hsa00280	Amino acid metabolism	Valine, leucine and isoleucine degradation - Homo sapiens (human)	ACSF3	acyl-CoA	acyl-CoA synthetase family member 3
hsa00280	Amino acid metabolism	Valine, leucine and isoleucine degradation - Homo sapiens (human)	ABAT	4-aminobutyrate	4-aminobutyrate aminotransferase
hsa00280	Amino acid metabolism	Valine, leucine and isoleucine degradation - Homo sapiens (human)	AGXT2	alanine--glyoxylate	alanine--glyoxylate aminotransferase 2
hsa00280	Amino acid metabolism	Valine, leucine and isoleucine degradation - Homo sapiens (human)	MCCC1	methylcrotonyl-CoA	methylcrotonyl-CoA carboxylase subunit 1
hsa00280	Amino acid metabolism	Valine, leucine and isoleucine degradation - Homo sapiens (human)	MCCC2	methylcrotonyl-CoA	methylcrotonyl-CoA carboxylase subunit 2
hsa00280	Amino acid metabolism	Valine, leucine and isoleucine degradation - Homo sapiens (human)	AUH	AU	AU RNA binding methylglutaconyl-CoA hydratase
hsa00280	Amino acid metabolism	Valine, leucine and isoleucine degradation - Homo sapiens (human)	HMGCL	3-hydroxy-3-methylglutaryl-CoA	3-hydroxy-3-methylglutaryl-CoA lyase
hsa00280	Amino acid metabolism	Valine, leucine and isoleucine degradation - Homo sapiens (human)	HMGCLL1	3-hydroxy-3-methylglutaryl-CoA	3-hydroxy-3-methylglutaryl-CoA lyase like 1
hsa00280	Amino acid metabolism	Valine, leucine and isoleucine degradation - Homo sapiens (human)	OXCT1	3-oxoacid	3-oxoacid CoA-transferase 1
hsa00280	Amino acid metabolism	Valine, leucine and isoleucine degradation - Homo sapiens (human)	OXCT2	3-oxoacid	3-oxoacid CoA-transferase 2
hsa00280	Amino acid metabolism	Valine, leucine and isoleucine degradation - Homo sapiens (human)	AACS	acetoacetyl-CoA	acetoacetyl-CoA synthetase
hsa00280	Amino acid metabolism	Valine, leucine and isoleucine degradation - Homo sapiens (human)	ACAT2	acetyl-CoA	acetyl-CoA acetyltransferase 2
hsa00280	Amino acid metabolism	Valine, leucine and isoleucine degradation - Homo sapiens (human)	ACAT1	acetyl-CoA	acetyl-CoA acetyltransferase 1
hsa00280	Amino acid metabolism	Valine, leucine and isoleucine degradation - Homo sapiens (human)	HMGCS1	3-hydroxy-3-methylglutaryl-CoA	3-hydroxy-3-methylglutaryl-CoA synthase 1
hsa00280	Amino acid metabolism	Valine, leucine and isoleucine degradation - Homo sapiens (human)	HMGCS2	3-hydroxy-3-methylglutaryl-CoA	3-hydroxy-3-methylglutaryl-CoA synthase 2
hsa00290	Amino acid metabolism	Valine, leucine and isoleucine biosynthesis - Homo sapiens (human)	SDS	serine	serine dehydratase
hsa00290	Amino acid metabolism	Valine, leucine and isoleucine biosynthesis - Homo sapiens (human)	SDSL	serine	serine dehydratase like
hsa00290	Amino acid metabolism	Valine, leucine and isoleucine biosynthesis - Homo sapiens (human)	BCAT2	branched	branched chain amino acid transaminase 2
hsa00290	Amino acid metabolism	Valine, leucine and isoleucine biosynthesis - Homo sapiens (human)	BCAT1	branched	branched chain amino acid transaminase 1
hsa00310	Amino acid metabolism	Lysine degradation - Homo sapiens (human)	AASS	aminoadipate-semialdehyde	aminoadipate-semialdehyde synthase
hsa00310	Amino acid metabolism	Lysine degradation - Homo sapiens (human)	ALDH7A1	aldehyde	aldehyde dehydrogenase 7 family member A1
hsa00310	Amino acid metabolism	Lysine degradation - Homo sapiens (human)	AADAT	aminoadipate	aminoadipate aminotransferase
hsa00310	Amino acid metabolism	Lysine degradation - Homo sapiens (human)	DHTKD1	dehydrogenase	dehydrogenase E1 and transketolase domain containing 1
hsa00310	Amino acid metabolism	Lysine degradation - Homo sapiens (human)	DLST	dihydrolipoamide	dihydrolipoamide S-succinyltransferase
hsa00310	Amino acid metabolism	Lysine degradation - Homo sapiens (human)	DLD	dihydrolipoamide	dihydrolipoamide dehydrogenase
hsa00310	Amino acid metabolism	Lysine degradation - Homo sapiens (human)	GCDH	glutaryl-CoA	glutaryl-CoA dehydrogenase
hsa00310	Amino acid metabolism	Lysine degradation - Homo sapiens (human)	HADHA	hydroxyacyl-CoA	hydroxyacyl-CoA dehydrogenase trifunctional multienzyme complex subunit alpha
hsa00310	Amino acid metabolism	Lysine degradation - Homo sapiens (human)	EHHADH	enoyl-CoA	enoyl-CoA hydratase and 3-hydroxyacyl CoA dehydrogenase
hsa00310	Amino acid metabolism	Lysine degradation - Homo sapiens (human)	ECHS1	enoyl-CoA	enoyl-CoA hydratase, short chain 1
hsa00310	Amino acid metabolism	Lysine degradation - Homo sapiens (human)	HADH	hydroxyacyl-CoA	hydroxyacyl-CoA dehydrogenase
hsa00310	Amino acid metabolism	Lysine degradation - Homo sapiens (human)	ACAT2	acetyl-CoA	acetyl-CoA acetyltransferase 2
hsa00310	Amino acid metabolism	Lysine degradation - Homo sapiens (human)	ACAT1	acetyl-CoA	acetyl-CoA acetyltransferase 1
hsa00310	Amino acid metabolism	Lysine degradation - Homo sapiens (human)	HYKK	hydroxylysine	hydroxylysine kinase
hsa00310	Amino acid metabolism	Lysine degradation - Homo sapiens (human)	PHYKPL	5-phosphohydroxy-L-lysine	5-phosphohydroxy-L-lysine phospho-lyase
hsa00310	Amino acid metabolism	Lysine degradation - Homo sapiens (human)	PIPOX	pipecolic	pipecolic acid and sarcosine oxidase
hsa00310	Amino acid metabolism	Lysine degradation - Homo sapiens (human)	CAMKMT	calmodulin-lysine	calmodulin-lysine N-methyltransferase
hsa00310	Amino acid metabolism	Lysine degradation - Homo sapiens (human)	KMT2A	lysine	lysine methyltransferase 2A
hsa00310	Amino acid metabolism	Lysine degradation - Homo sapiens (human)	KMT2D	lysine	lysine methyltransferase 2D
hsa00310	Amino acid metabolism	Lysine degradation - Homo sapiens (human)	KMT2C	lysine	lysine methyltransferase 2C
hsa00310	Amino acid metabolism	Lysine degradation - Homo sapiens (human)	KMT2B	lysine	lysine methyltransferase 2B
hsa00310	Amino acid metabolism	Lysine degradation - Homo sapiens (human)	KMT2E	lysine	lysine methyltransferase 2E (inactive)
hsa00310	Amino acid metabolism	Lysine degradation - Homo sapiens (human)	SETD1B	SET	SET domain containing 1B, histone lysine methyltransferase
hsa00310	Amino acid metabolism	Lysine degradation - Homo sapiens (human)	SETD1A	SET	SET domain containing 1A, histone lysine methyltransferase
hsa00310	Amino acid metabolism	Lysine degradation - Homo sapiens (human)	SETD7	SET	SET domain containing 7, histone lysine methyltransferase
hsa00310	Amino acid metabolism	Lysine degradation - Homo sapiens (human)	PRDM9	PR/SET	PR/SET domain 9
hsa00310	Amino acid metabolism	Lysine degradation - Homo sapiens (human)	PRDM7	PR/SET	PR/SET domain 7
hsa00310	Amino acid metabolism	Lysine degradation - Homo sapiens (human)	ASH1L	ASH1	ASH1 like histone lysine methyltransferase
hsa00310	Amino acid metabolism	Lysine degradation - Homo sapiens (human)	SMYD2	SET	SET and MYND domain containing 2
hsa00310	Amino acid metabolism	Lysine degradation - Homo sapiens (human)	SMYD3	SET	SET and MYND domain containing 3
hsa00310	Amino acid metabolism	Lysine degradation - Homo sapiens (human)	SMYD1	SET	SET and MYND domain containing 1
hsa00310	Amino acid metabolism	Lysine degradation - Homo sapiens (human)	SUV39H1	SUV39H1	SUV39H1 histone lysine methyltransferase
hsa00310	Amino acid metabolism	Lysine degradation - Homo sapiens (human)	SUV39H2	SUV39H2	SUV39H2 histone lysine methyltransferase
hsa00310	Amino acid metabolism	Lysine degradation - Homo sapiens (human)	EHMT2	euchromatic	euchromatic histone lysine methyltransferase 2
hsa00310	Amino acid metabolism	Lysine degradation - Homo sapiens (human)	EHMT1	euchromatic	euchromatic histone lysine methyltransferase 1
hsa00310	Amino acid metabolism	Lysine degradation - Homo sapiens (human)	SETDB1	SET	SET domain bifurcated histone lysine methyltransferase 1
hsa00310	Amino acid metabolism	Lysine degradation - Homo sapiens (human)	SETDB2	SET	SET domain bifurcated histone lysine methyltransferase 2
hsa00310	Amino acid metabolism	Lysine degradation - Homo sapiens (human)	PRDM2	PR/SET	PR/SET domain 2
hsa00310	Amino acid metabolism	Lysine degradation - Homo sapiens (human)	EZH1	enhancer	enhancer of zeste 1 polycomb repressive complex 2 subunit
hsa00310	Amino acid metabolism	Lysine degradation - Homo sapiens (human)	EZH2	enhancer	enhancer of zeste 2 polycomb repressive complex 2 subunit
hsa00310	Amino acid metabolism	Lysine degradation - Homo sapiens (human)	SETMAR	SET	SET domain and mariner transposase fusion gene
hsa00310	Amino acid metabolism	Lysine degradation - Homo sapiens (human)	NSD1	nuclear	nuclear receptor binding SET domain protein 1
hsa00310	Amino acid metabolism	Lysine degradation - Homo sapiens (human)	WHSC1	nuclear	nuclear receptor binding SET domain protein 2
hsa00310	Amino acid metabolism	Lysine degradation - Homo sapiens (human)	WHSC1L1	nuclear	nuclear receptor binding SET domain protein 3
hsa00310	Amino acid metabolism	Lysine degradation - Homo sapiens (human)	SETD2	SET	SET domain containing 2, histone lysine methyltransferase
hsa00310	Amino acid metabolism	Lysine degradation - Homo sapiens (human)	DOT1L	DOT1	DOT1 like histone lysine methyltransferase
hsa00310	Amino acid metabolism	Lysine degradation - Homo sapiens (human)	SETD8	lysine	lysine methyltransferase 5A
hsa00310	Amino acid metabolism	Lysine degradation - Homo sapiens (human)	PRDM6	PR/SET	PR/SET domain 6
hsa00310	Amino acid metabolism	Lysine degradation - Homo sapiens (human)	SUV420H2	lysine	lysine methyltransferase 5C
hsa00310	Amino acid metabolism	Lysine degradation - Homo sapiens (human)	SUV420H1	lysine	lysine methyltransferase 5B
hsa00310	Amino acid metabolism	Lysine degradation - Homo sapiens (human)	MECOM	MDS1	MDS1 and EVI1 complex locus
hsa00310	Amino acid metabolism	Lysine degradation - Homo sapiens (human)	PRDM16	PR/SET	PR/SET domain 16
hsa00310	Amino acid metabolism	Lysine degradation - Homo sapiens (human)	TMLHE	trimethyllysine	trimethyllysine hydroxylase, epsilon
hsa00310	Amino acid metabolism	Lysine degradation - Homo sapiens (human)	ALDH2	aldehyde	aldehyde dehydrogenase 2 family member
hsa00310	Amino acid metabolism	Lysine degradation - Homo sapiens (human)	ALDH3A2	aldehyde	aldehyde dehydrogenase 3 family member A2
hsa00310	Amino acid metabolism	Lysine degradation - Homo sapiens (human)	ALDH1B1	aldehyde	aldehyde dehydrogenase 1 family member B1
hsa00310	Amino acid metabolism	Lysine degradation - Homo sapiens (human)	ALDH9A1	aldehyde	aldehyde dehydrogenase 9 family member A1
hsa00310	Amino acid metabolism	Lysine degradation - Homo sapiens (human)	BBOX1	gamma-butyrobetaine	gamma-butyrobetaine hydroxylase 1
hsa00310	Amino acid metabolism	Lysine degradation - Homo sapiens (human)	PLOD1	procollagen-lysine,2-oxoglutarate	procollagen-lysine,2-oxoglutarate 5-dioxygenase 1
hsa00310	Amino acid metabolism	Lysine degradation - Homo sapiens (human)	PLOD2	procollagen-lysine,2-oxoglutarate	procollagen-lysine,2-oxoglutarate 5-dioxygenase 2
hsa00310	Amino acid metabolism	Lysine degradation - Homo sapiens (human)	PLOD3	procollagen-lysine,2-oxoglutarate	procollagen-lysine,2-oxoglutarate 5-dioxygenase 3
hsa00310	Amino acid metabolism	Lysine degradation - Homo sapiens (human)	COLGALT1	collagen	collagen beta(1-O)galactosyltransferase 1
hsa00310	Amino acid metabolism	Lysine degradation - Homo sapiens (human)	COLGALT2	collagen	collagen beta(1-O)galactosyltransferase 2
hsa00220	Amino acid metabolism	Arginine biosynthesis - Homo sapiens (human)	OTC	ornithine	ornithine transcarbamylase
hsa00220	Amino acid metabolism	Arginine biosynthesis - Homo sapiens (human)	ASS1	argininosuccinate	argininosuccinate synthase 1
hsa00220	Amino acid metabolism	Arginine biosynthesis - Homo sapiens (human)	ASL	argininosuccinate	argininosuccinate lyase
hsa00220	Amino acid metabolism	Arginine biosynthesis - Homo sapiens (human)	ARG2	arginase	arginase 2
hsa00220	Amino acid metabolism	Arginine biosynthesis - Homo sapiens (human)	ARG1	arginase	arginase 1
hsa00220	Amino acid metabolism	Arginine biosynthesis - Homo sapiens (human)	NOS1	nitric	nitric oxide synthase 1
hsa00220	Amino acid metabolism	Arginine biosynthesis - Homo sapiens (human)	NOS2	nitric	nitric oxide synthase 2
hsa00220	Amino acid metabolism	Arginine biosynthesis - Homo sapiens (human)	NOS3	nitric	nitric oxide synthase 3
hsa00220	Amino acid metabolism	Arginine biosynthesis - Homo sapiens (human)	GLS2	glutaminase	glutaminase 2
hsa00220	Amino acid metabolism	Arginine biosynthesis - Homo sapiens (human)	GLS	glutaminase	glutaminase
hsa00220	Amino acid metabolism	Arginine biosynthesis - Homo sapiens (human)	GLUL	glutamate-ammonia	glutamate-ammonia ligase
hsa00220	Amino acid metabolism	Arginine biosynthesis - Homo sapiens (human)	CAD	carbamoyl-phosphate	carbamoyl-phosphate synthetase 2, aspartate transcarbamylase, and dihydroorotase
hsa00220	Amino acid metabolism	Arginine biosynthesis - Homo sapiens (human)	CPS1	carbamoyl-phosphate	carbamoyl-phosphate synthase 1
hsa00220	Amino acid metabolism	Arginine biosynthesis - Homo sapiens (human)	GLUD2	glutamate	glutamate dehydrogenase 2
hsa00220	Amino acid metabolism	Arginine biosynthesis - Homo sapiens (human)	GLUD1	glutamate	glutamate dehydrogenase 1
hsa00220	Amino acid metabolism	Arginine biosynthesis - Homo sapiens (human)	GOT1	glutamic-oxaloacetic	glutamic-oxaloacetic transaminase 1
hsa00220	Amino acid metabolism	Arginine biosynthesis - Homo sapiens (human)	GOT1L1	glutamic-oxaloacetic	glutamic-oxaloacetic transaminase 1 like 1
hsa00220	Amino acid metabolism	Arginine biosynthesis - Homo sapiens (human)	GOT2	glutamic-oxaloacetic	glutamic-oxaloacetic transaminase 2
hsa00220	Amino acid metabolism	Arginine biosynthesis - Homo sapiens (human)	GPT2	glutamic--pyruvic	glutamic--pyruvic transaminase 2
hsa00220	Amino acid metabolism	Arginine biosynthesis - Homo sapiens (human)	GPT	glutamic--pyruvic	glutamic--pyruvic transaminase
hsa00220	Amino acid metabolism	Arginine biosynthesis - Homo sapiens (human)	NAGS	N-acetylglutamate	N-acetylglutamate synthase
hsa00220	Amino acid metabolism	Arginine biosynthesis - Homo sapiens (human)	ACY1	aminoacylase	aminoacylase 1
hsa00220	Amino acid metabolism	Arginine biosynthesis - Homo sapiens (human)	ABHD14A-ACY1	ABHD14A-ACY1	ABHD14A-ACY1 readthrough
hsa00330	Amino acid metabolism	Arginine and proline metabolism - Homo sapiens (human)	GATM	glycine	glycine amidinotransferase
hsa00330	Amino acid metabolism	Arginine and proline metabolism - Homo sapiens (human)	GAMT	guanidinoacetate	guanidinoacetate N-methyltransferase
hsa00330	Amino acid metabolism	Arginine and proline metabolism - Homo sapiens (human)	CKMT1A	creatine	creatine kinase, mitochondrial 1A
hsa00330	Amino acid metabolism	Arginine and proline metabolism - Homo sapiens (human)	CKMT2	creatine	creatine kinase, mitochondrial 2
hsa00330	Amino acid metabolism	Arginine and proline metabolism - Homo sapiens (human)	CKB	creatine	creatine kinase B
hsa00330	Amino acid metabolism	Arginine and proline metabolism - Homo sapiens (human)	CKMT1B	creatine	creatine kinase, mitochondrial 1B
hsa00330	Amino acid metabolism	Arginine and proline metabolism - Homo sapiens (human)	CKM	creatine	creatine kinase, M-type
hsa00330	Amino acid metabolism	Arginine and proline metabolism - Homo sapiens (human)	AZIN2	antizyme	antizyme inhibitor 2
hsa00330	Amino acid metabolism	Arginine and proline metabolism - Homo sapiens (human)	ODC1	ornithine	ornithine decarboxylase 1
hsa00330	Amino acid metabolism	Arginine and proline metabolism - Homo sapiens (human)	SRM	spermidine	spermidine synthase
hsa00330	Amino acid metabolism	Arginine and proline metabolism - Homo sapiens (human)	SMS	spermine	spermine synthase
hsa00330	Amino acid metabolism	Arginine and proline metabolism - Homo sapiens (human)	AMD1	adenosylmethionine	adenosylmethionine decarboxylase 1
hsa00330	Amino acid metabolism	Arginine and proline metabolism - Homo sapiens (human)	AOC1	amine	amine oxidase copper containing 1
hsa00330	Amino acid metabolism	Arginine and proline metabolism - Homo sapiens (human)	SMOX	spermine	spermine oxidase
hsa00330	Amino acid metabolism	Arginine and proline metabolism - Homo sapiens (human)	ALDH2	aldehyde	aldehyde dehydrogenase 2 family member
hsa00330	Amino acid metabolism	Arginine and proline metabolism - Homo sapiens (human)	ALDH3A2	aldehyde	aldehyde dehydrogenase 3 family member A2
hsa00330	Amino acid metabolism	Arginine and proline metabolism - Homo sapiens (human)	ALDH1B1	aldehyde	aldehyde dehydrogenase 1 family member B1
hsa00330	Amino acid metabolism	Arginine and proline metabolism - Homo sapiens (human)	ALDH7A1	aldehyde	aldehyde dehydrogenase 7 family member A1
hsa00330	Amino acid metabolism	Arginine and proline metabolism - Homo sapiens (human)	ALDH9A1	aldehyde	aldehyde dehydrogenase 9 family member A1
hsa00330	Amino acid metabolism	Arginine and proline metabolism - Homo sapiens (human)	CNDP1	carnosine	carnosine dipeptidase 1
hsa00330	Amino acid metabolism	Arginine and proline metabolism - Homo sapiens (human)	CNDP2	carnosine	carnosine dipeptidase 2
hsa00330	Amino acid metabolism	Arginine and proline metabolism - Homo sapiens (human)	CARNS1	carnosine	carnosine synthase 1
hsa00330	Amino acid metabolism	Arginine and proline metabolism - Homo sapiens (human)	SAT2	spermidine/spermine	spermidine/spermine N1-acetyltransferase family member 2
hsa00330	Amino acid metabolism	Arginine and proline metabolism - Homo sapiens (human)	SAT1	spermidine/spermine	spermidine/spermine N1-acetyltransferase 1
hsa00330	Amino acid metabolism	Arginine and proline metabolism - Homo sapiens (human)	MAOB	monoamine	monoamine oxidase B
hsa00330	Amino acid metabolism	Arginine and proline metabolism - Homo sapiens (human)	MAOA	monoamine	monoamine oxidase A
hsa00330	Amino acid metabolism	Arginine and proline metabolism - Homo sapiens (human)	AGMAT	agmatinase	agmatinase (putative)
hsa00330	Amino acid metabolism	Arginine and proline metabolism - Homo sapiens (human)	NOS1	nitric	nitric oxide synthase 1
hsa00330	Amino acid metabolism	Arginine and proline metabolism - Homo sapiens (human)	NOS2	nitric	nitric oxide synthase 2
hsa00330	Amino acid metabolism	Arginine and proline metabolism - Homo sapiens (human)	NOS3	nitric	nitric oxide synthase 3
hsa00330	Amino acid metabolism	Arginine and proline metabolism - Homo sapiens (human)	ARG2	arginase	arginase 2
hsa00330	Amino acid metabolism	Arginine and proline metabolism - Homo sapiens (human)	ARG1	arginase	arginase 1
hsa00330	Amino acid metabolism	Arginine and proline metabolism - Homo sapiens (human)	OAT	ornithine	ornithine aminotransferase
hsa00330	Amino acid metabolism	Arginine and proline metabolism - Homo sapiens (human)	PYCRL	pyrroline-5-carboxylate	pyrroline-5-carboxylate reductase 3
hsa00330	Amino acid metabolism	Arginine and proline metabolism - Homo sapiens (human)	PYCR2	pyrroline-5-carboxylate	pyrroline-5-carboxylate reductase 2
hsa00330	Amino acid metabolism	Arginine and proline metabolism - Homo sapiens (human)	PYCR1	pyrroline-5-carboxylate	pyrroline-5-carboxylate reductase 1
hsa00330	Amino acid metabolism	Arginine and proline metabolism - Homo sapiens (human)	PRODH	proline	proline dehydrogenase 1
hsa00330	Amino acid metabolism	Arginine and proline metabolism - Homo sapiens (human)	ALDH4A1	aldehyde	aldehyde dehydrogenase 4 family member A1
hsa00330	Amino acid metabolism	Arginine and proline metabolism - Homo sapiens (human)	ALDH18A1	aldehyde	aldehyde dehydrogenase 18 family member A1
hsa00330	Amino acid metabolism	Arginine and proline metabolism - Homo sapiens (human)	LAP3	leucine	leucine aminopeptidase 3
hsa00330	Amino acid metabolism	Arginine and proline metabolism - Homo sapiens (human)	P4HA2	prolyl	prolyl 4-hydroxylase subunit alpha 2
hsa00330	Amino acid metabolism	Arginine and proline metabolism - Homo sapiens (human)	P4HA3	prolyl	prolyl 4-hydroxylase subunit alpha 3
hsa00330	Amino acid metabolism	Arginine and proline metabolism - Homo sapiens (human)	P4HA1	prolyl	prolyl 4-hydroxylase subunit alpha 1
hsa00330	Amino acid metabolism	Arginine and proline metabolism - Homo sapiens (human)	PRODH2	proline	proline dehydrogenase 2
hsa00330	Amino acid metabolism	Arginine and proline metabolism - Homo sapiens (human)	GOT1	glutamic-oxaloacetic	glutamic-oxaloacetic transaminase 1
hsa00330	Amino acid metabolism	Arginine and proline metabolism - Homo sapiens (human)	GOT1L1	glutamic-oxaloacetic	glutamic-oxaloacetic transaminase 1 like 1
hsa00330	Amino acid metabolism	Arginine and proline metabolism - Homo sapiens (human)	GOT2	glutamic-oxaloacetic	glutamic-oxaloacetic transaminase 2
hsa00330	Amino acid metabolism	Arginine and proline metabolism - Homo sapiens (human)	HOGA1	4-hydroxy-2-oxoglutarate	4-hydroxy-2-oxoglutarate aldolase 1
hsa00330	Amino acid metabolism	Arginine and proline metabolism - Homo sapiens (human)	DAO	D-amino	D-amino acid oxidase
hsa00330	Amino acid metabolism	Arginine and proline metabolism - Homo sapiens (human)	L3HYPDH	trans-L-3-hydroxyproline	trans-L-3-hydroxyproline dehydratase
hsa00340	Amino acid metabolism	Histidine metabolism - Homo sapiens (human)	HAL	histidine	histidine ammonia-lyase
hsa00340	Amino acid metabolism	Histidine metabolism - Homo sapiens (human)	UROC1	urocanate	urocanate hydratase 1
hsa00340	Amino acid metabolism	Histidine metabolism - Homo sapiens (human)	AMDHD1	amidohydrolase	amidohydrolase domain containing 1
hsa00340	Amino acid metabolism	Histidine metabolism - Homo sapiens (human)	FTCD	formimidoyltransferase	formimidoyltransferase cyclodeaminase
hsa00340	Amino acid metabolism	Histidine metabolism - Homo sapiens (human)	HDC	histidine	histidine decarboxylase
hsa00340	Amino acid metabolism	Histidine metabolism - Homo sapiens (human)	AOC1	amine	amine oxidase copper containing 1
hsa00340	Amino acid metabolism	Histidine metabolism - Homo sapiens (human)	ALDH2	aldehyde	aldehyde dehydrogenase 2 family member
hsa00340	Amino acid metabolism	Histidine metabolism - Homo sapiens (human)	ALDH3A2	aldehyde	aldehyde dehydrogenase 3 family member A2
hsa00340	Amino acid metabolism	Histidine metabolism - Homo sapiens (human)	ALDH1B1	aldehyde	aldehyde dehydrogenase 1 family member B1
hsa00340	Amino acid metabolism	Histidine metabolism - Homo sapiens (human)	ALDH7A1	aldehyde	aldehyde dehydrogenase 7 family member A1
hsa00340	Amino acid metabolism	Histidine metabolism - Homo sapiens (human)	ALDH9A1	aldehyde	aldehyde dehydrogenase 9 family member A1
hsa00340	Amino acid metabolism	Histidine metabolism - Homo sapiens (human)	ASPA	aspartoacylase	aspartoacylase
hsa00340	Amino acid metabolism	Histidine metabolism - Homo sapiens (human)	HNMT	histamine	histamine N-methyltransferase
hsa00340	Amino acid metabolism	Histidine metabolism - Homo sapiens (human)	MAOB	monoamine	monoamine oxidase B
hsa00340	Amino acid metabolism	Histidine metabolism - Homo sapiens (human)	MAOA	monoamine	monoamine oxidase A
hsa00340	Amino acid metabolism	Histidine metabolism - Homo sapiens (human)	ALDH3B1	aldehyde	aldehyde dehydrogenase 3 family member B1
hsa00340	Amino acid metabolism	Histidine metabolism - Homo sapiens (human)	ALDH3B2	aldehyde	aldehyde dehydrogenase 3 family member B2
hsa00340	Amino acid metabolism	Histidine metabolism - Homo sapiens (human)	ALDH3A1	aldehyde	aldehyde dehydrogenase 3 family member A1
hsa00340	Amino acid metabolism	Histidine metabolism - Homo sapiens (human)	CARNS1	carnosine	carnosine synthase 1
hsa00340	Amino acid metabolism	Histidine metabolism - Homo sapiens (human)	C9orf41	carnosine	carnosine N-methyltransferase 1
hsa00340	Amino acid metabolism	Histidine metabolism - Homo sapiens (human)	CNDP2	carnosine	carnosine dipeptidase 2
hsa00340	Amino acid metabolism	Histidine metabolism - Homo sapiens (human)	CNDP1	carnosine	carnosine dipeptidase 1
hsa00350	Amino acid metabolism	Tyrosine metabolism - Homo sapiens (human)	GOT1	glutamic-oxaloacetic	glutamic-oxaloacetic transaminase 1
hsa00350	Amino acid metabolism	Tyrosine metabolism - Homo sapiens (human)	GOT1L1	glutamic-oxaloacetic	glutamic-oxaloacetic transaminase 1 like 1
hsa00350	Amino acid metabolism	Tyrosine metabolism - Homo sapiens (human)	GOT2	glutamic-oxaloacetic	glutamic-oxaloacetic transaminase 2
hsa00350	Amino acid metabolism	Tyrosine metabolism - Homo sapiens (human)	TAT	tyrosine	tyrosine aminotransferase
hsa00350	Amino acid metabolism	Tyrosine metabolism - Homo sapiens (human)	IL4I1	interleukin	interleukin 4 induced 1
hsa00350	Amino acid metabolism	Tyrosine metabolism - Homo sapiens (human)	HPD	4-hydroxyphenylpyruvate	4-hydroxyphenylpyruvate dioxygenase
hsa00350	Amino acid metabolism	Tyrosine metabolism - Homo sapiens (human)	HGD	homogentisate	homogentisate 1,2-dioxygenase
hsa00350	Amino acid metabolism	Tyrosine metabolism - Homo sapiens (human)	GSTZ1	glutathione	glutathione S-transferase zeta 1
hsa00350	Amino acid metabolism	Tyrosine metabolism - Homo sapiens (human)	FAH	fumarylacetoacetate	fumarylacetoacetate hydrolase
hsa00350	Amino acid metabolism	Tyrosine metabolism - Homo sapiens (human)	TYR	tyrosinase	tyrosinase
hsa00350	Amino acid metabolism	Tyrosine metabolism - Homo sapiens (human)	TH	tyrosine	tyrosine hydroxylase
hsa00350	Amino acid metabolism	Tyrosine metabolism - Homo sapiens (human)	DCT	dopachrome	dopachrome tautomerase
hsa00350	Amino acid metabolism	Tyrosine metabolism - Homo sapiens (human)	TYRP1	tyrosinase	tyrosinase related protein 1
hsa00350	Amino acid metabolism	Tyrosine metabolism - Homo sapiens (human)	DDC	dopa	dopa decarboxylase
hsa00350	Amino acid metabolism	Tyrosine metabolism - Homo sapiens (human)	DBH	dopamine	dopamine beta-hydroxylase
hsa00350	Amino acid metabolism	Tyrosine metabolism - Homo sapiens (human)	PNMT	phenylethanolamine	phenylethanolamine N-methyltransferase
hsa00350	Amino acid metabolism	Tyrosine metabolism - Homo sapiens (human)	COMT	catechol-O-methyltransferase	catechol-O-methyltransferase
hsa00350	Amino acid metabolism	Tyrosine metabolism - Homo sapiens (human)	LRTOMT	leucine	leucine rich transmembrane and O-methyltransferase domain containing
hsa00350	Amino acid metabolism	Tyrosine metabolism - Homo sapiens (human)	MAOB	monoamine	monoamine oxidase B
hsa00350	Amino acid metabolism	Tyrosine metabolism - Homo sapiens (human)	MAOA	monoamine	monoamine oxidase A
hsa00350	Amino acid metabolism	Tyrosine metabolism - Homo sapiens (human)	AOC3	amine	amine oxidase copper containing 3
hsa00350	Amino acid metabolism	Tyrosine metabolism - Homo sapiens (human)	AOC2	amine	amine oxidase copper containing 2
hsa00350	Amino acid metabolism	Tyrosine metabolism - Homo sapiens (human)	ALDH3B1	aldehyde	aldehyde dehydrogenase 3 family member B1
hsa00350	Amino acid metabolism	Tyrosine metabolism - Homo sapiens (human)	ALDH3B2	aldehyde	aldehyde dehydrogenase 3 family member B2
hsa00350	Amino acid metabolism	Tyrosine metabolism - Homo sapiens (human)	ALDH3A1	aldehyde	aldehyde dehydrogenase 3 family member A1
hsa00350	Amino acid metabolism	Tyrosine metabolism - Homo sapiens (human)	ADH1A	alcohol	alcohol dehydrogenase 1A (class I), alpha polypeptide
hsa00350	Amino acid metabolism	Tyrosine metabolism - Homo sapiens (human)	ADH1B	alcohol	alcohol dehydrogenase 1B (class I), beta polypeptide
hsa00350	Amino acid metabolism	Tyrosine metabolism - Homo sapiens (human)	ADH1C	alcohol	alcohol dehydrogenase 1C (class I), gamma polypeptide
hsa00350	Amino acid metabolism	Tyrosine metabolism - Homo sapiens (human)	ADH7	alcohol	alcohol dehydrogenase 7 (class IV), mu or sigma polypeptide
hsa00350	Amino acid metabolism	Tyrosine metabolism - Homo sapiens (human)	ADH4	alcohol	alcohol dehydrogenase 4 (class II), pi polypeptide
hsa00350	Amino acid metabolism	Tyrosine metabolism - Homo sapiens (human)	ADH5	alcohol	alcohol dehydrogenase 5 (class III), chi polypeptide
hsa00350	Amino acid metabolism	Tyrosine metabolism - Homo sapiens (human)	ADH6	alcohol	alcohol dehydrogenase 6 (class V)
hsa00350	Amino acid metabolism	Tyrosine metabolism - Homo sapiens (human)	TPO	thyroid	thyroid peroxidase
hsa00350	Amino acid metabolism	Tyrosine metabolism - Homo sapiens (human)	AOX1	aldehyde	aldehyde oxidase 1
hsa00350	Amino acid metabolism	Tyrosine metabolism - Homo sapiens (human)	FAHD1	fumarylacetoacetate	fumarylacetoacetate hydrolase domain containing 1
hsa00350	Amino acid metabolism	Tyrosine metabolism - Homo sapiens (human)	MIF	macrophage	macrophage migration inhibitory factor
hsa00360	Amino acid metabolism	Phenylalanine metabolism - Homo sapiens (human)	PAH	phenylalanine	phenylalanine hydroxylase
hsa00360	Amino acid metabolism	Phenylalanine metabolism - Homo sapiens (human)	DDC	dopa	dopa decarboxylase
hsa00360	Amino acid metabolism	Phenylalanine metabolism - Homo sapiens (human)	AOC3	amine	amine oxidase copper containing 3
hsa00360	Amino acid metabolism	Phenylalanine metabolism - Homo sapiens (human)	AOC2	amine	amine oxidase copper containing 2
hsa00360	Amino acid metabolism	Phenylalanine metabolism - Homo sapiens (human)	MAOB	monoamine	monoamine oxidase B
hsa00360	Amino acid metabolism	Phenylalanine metabolism - Homo sapiens (human)	MAOA	monoamine	monoamine oxidase A
hsa00360	Amino acid metabolism	Phenylalanine metabolism - Homo sapiens (human)	ALDH3B1	aldehyde	aldehyde dehydrogenase 3 family member B1
hsa00360	Amino acid metabolism	Phenylalanine metabolism - Homo sapiens (human)	ALDH3B2	aldehyde	aldehyde dehydrogenase 3 family member B2
hsa00360	Amino acid metabolism	Phenylalanine metabolism - Homo sapiens (human)	ALDH3A1	aldehyde	aldehyde dehydrogenase 3 family member A1
hsa00360	Amino acid metabolism	Phenylalanine metabolism - Homo sapiens (human)	GOT1	glutamic-oxaloacetic	glutamic-oxaloacetic transaminase 1
hsa00360	Amino acid metabolism	Phenylalanine metabolism - Homo sapiens (human)	GOT1L1	glutamic-oxaloacetic	glutamic-oxaloacetic transaminase 1 like 1
hsa00360	Amino acid metabolism	Phenylalanine metabolism - Homo sapiens (human)	GOT2	glutamic-oxaloacetic	glutamic-oxaloacetic transaminase 2
hsa00360	Amino acid metabolism	Phenylalanine metabolism - Homo sapiens (human)	TAT	tyrosine	tyrosine aminotransferase
hsa00360	Amino acid metabolism	Phenylalanine metabolism - Homo sapiens (human)	IL4I1	interleukin	interleukin 4 induced 1
hsa00360	Amino acid metabolism	Phenylalanine metabolism - Homo sapiens (human)	HPD	4-hydroxyphenylpyruvate	4-hydroxyphenylpyruvate dioxygenase
hsa00360	Amino acid metabolism	Phenylalanine metabolism - Homo sapiens (human)	MIF	macrophage	macrophage migration inhibitory factor
hsa00380	Amino acid metabolism	Tryptophan metabolism - Homo sapiens (human)	TDO2	tryptophan	tryptophan 2,3-dioxygenase
hsa00380	Amino acid metabolism	Tryptophan metabolism - Homo sapiens (human)	IDO1	indoleamine	indoleamine 2,3-dioxygenase 1
hsa00380	Amino acid metabolism	Tryptophan metabolism - Homo sapiens (human)	IDO2	indoleamine	indoleamine 2,3-dioxygenase 2
hsa00380	Amino acid metabolism	Tryptophan metabolism - Homo sapiens (human)	AFMID	arylformamidase	arylformamidase
hsa00380	Amino acid metabolism	Tryptophan metabolism - Homo sapiens (human)	KMO	kynurenine	kynurenine 3-monooxygenase
hsa00380	Amino acid metabolism	Tryptophan metabolism - Homo sapiens (human)	KYNU	kynureninase	kynureninase
hsa00380	Amino acid metabolism	Tryptophan metabolism - Homo sapiens (human)	HAAO	3-hydroxyanthranilate	3-hydroxyanthranilate 3,4-dioxygenase
hsa00380	Amino acid metabolism	Tryptophan metabolism - Homo sapiens (human)	ACMSD	aminocarboxymuconate	aminocarboxymuconate semialdehyde decarboxylase
hsa00380	Amino acid metabolism	Tryptophan metabolism - Homo sapiens (human)	ALDH8A1	aldehyde	aldehyde dehydrogenase 8 family member A1
hsa00380	Amino acid metabolism	Tryptophan metabolism - Homo sapiens (human)	DHTKD1	dehydrogenase	dehydrogenase E1 and transketolase domain containing 1
hsa00380	Amino acid metabolism	Tryptophan metabolism - Homo sapiens (human)	DLST	dihydrolipoamide	dihydrolipoamide S-succinyltransferase
hsa00380	Amino acid metabolism	Tryptophan metabolism - Homo sapiens (human)	DLD	dihydrolipoamide	dihydrolipoamide dehydrogenase
hsa00380	Amino acid metabolism	Tryptophan metabolism - Homo sapiens (human)	GCDH	glutaryl-CoA	glutaryl-CoA dehydrogenase
hsa00380	Amino acid metabolism	Tryptophan metabolism - Homo sapiens (human)	HADHA	hydroxyacyl-CoA	hydroxyacyl-CoA dehydrogenase trifunctional multienzyme complex subunit alpha
hsa00380	Amino acid metabolism	Tryptophan metabolism - Homo sapiens (human)	EHHADH	enoyl-CoA	enoyl-CoA hydratase and 3-hydroxyacyl CoA dehydrogenase
hsa00380	Amino acid metabolism	Tryptophan metabolism - Homo sapiens (human)	ECHS1	enoyl-CoA	enoyl-CoA hydratase, short chain 1
hsa00380	Amino acid metabolism	Tryptophan metabolism - Homo sapiens (human)	HADH	hydroxyacyl-CoA	hydroxyacyl-CoA dehydrogenase
hsa00380	Amino acid metabolism	Tryptophan metabolism - Homo sapiens (human)	ACAT2	acetyl-CoA	acetyl-CoA acetyltransferase 2
hsa00380	Amino acid metabolism	Tryptophan metabolism - Homo sapiens (human)	ACAT1	acetyl-CoA	acetyl-CoA acetyltransferase 1
hsa00380	Amino acid metabolism	Tryptophan metabolism - Homo sapiens (human)	CCBL2	kynurenine	kynurenine aminotransferase 3
hsa00380	Amino acid metabolism	Tryptophan metabolism - Homo sapiens (human)	CCBL1	kynurenine	kynurenine aminotransferase 1
hsa00380	Amino acid metabolism	Tryptophan metabolism - Homo sapiens (human)	AADAT	aminoadipate	aminoadipate aminotransferase
hsa00380	Amino acid metabolism	Tryptophan metabolism - Homo sapiens (human)	TPH2	tryptophan	tryptophan hydroxylase 2
hsa00380	Amino acid metabolism	Tryptophan metabolism - Homo sapiens (human)	TPH1	tryptophan	tryptophan hydroxylase 1
hsa00380	Amino acid metabolism	Tryptophan metabolism - Homo sapiens (human)	DDC	dopa	dopa decarboxylase
hsa00380	Amino acid metabolism	Tryptophan metabolism - Homo sapiens (human)	MAOB	monoamine	monoamine oxidase B
hsa00380	Amino acid metabolism	Tryptophan metabolism - Homo sapiens (human)	MAOA	monoamine	monoamine oxidase A
hsa00380	Amino acid metabolism	Tryptophan metabolism - Homo sapiens (human)	ALDH2	aldehyde	aldehyde dehydrogenase 2 family member
hsa00380	Amino acid metabolism	Tryptophan metabolism - Homo sapiens (human)	ALDH3A2	aldehyde	aldehyde dehydrogenase 3 family member A2
hsa00380	Amino acid metabolism	Tryptophan metabolism - Homo sapiens (human)	ALDH1B1	aldehyde	aldehyde dehydrogenase 1 family member B1
hsa00380	Amino acid metabolism	Tryptophan metabolism - Homo sapiens (human)	ALDH7A1	aldehyde	aldehyde dehydrogenase 7 family member A1
hsa00380	Amino acid metabolism	Tryptophan metabolism - Homo sapiens (human)	ALDH9A1	aldehyde	aldehyde dehydrogenase 9 family member A1
hsa00380	Amino acid metabolism	Tryptophan metabolism - Homo sapiens (human)	AOX1	aldehyde	aldehyde oxidase 1
hsa00380	Amino acid metabolism	Tryptophan metabolism - Homo sapiens (human)	ASMT	acetylserotonin	acetylserotonin O-methyltransferase
hsa00380	Amino acid metabolism	Tryptophan metabolism - Homo sapiens (human)	AANAT	aralkylamine	aralkylamine N-acetyltransferase
hsa00380	Amino acid metabolism	Tryptophan metabolism - Homo sapiens (human)	CYP1A1	cytochrome	cytochrome P450 family 1 subfamily A member 1
hsa00380	Amino acid metabolism	Tryptophan metabolism - Homo sapiens (human)	CYP1A2	cytochrome	cytochrome P450 family 1 subfamily A member 2
hsa00380	Amino acid metabolism	Tryptophan metabolism - Homo sapiens (human)	CYP1B1	cytochrome	cytochrome P450 family 1 subfamily B member 1
hsa00380	Amino acid metabolism	Tryptophan metabolism - Homo sapiens (human)	INMT	indolethylamine	indolethylamine N-methyltransferase
hsa00380	Amino acid metabolism	Tryptophan metabolism - Homo sapiens (human)	IL4I1	interleukin	interleukin 4 induced 1
hsa00380	Amino acid metabolism	Tryptophan metabolism - Homo sapiens (human)	AOC1	amine	amine oxidase copper containing 1
hsa00380	Amino acid metabolism	Tryptophan metabolism - Homo sapiens (human)	CAT	catalase	catalase
hsa00400	Amino acid metabolism	Phenylalanine, tyrosine and tryptophan biosynthesis - Homo sapiens (human)	GOT1	glutamic-oxaloacetic	glutamic-oxaloacetic transaminase 1
hsa00400	Amino acid metabolism	Phenylalanine, tyrosine and tryptophan biosynthesis - Homo sapiens (human)	GOT1L1	glutamic-oxaloacetic	glutamic-oxaloacetic transaminase 1 like 1
hsa00400	Amino acid metabolism	Phenylalanine, tyrosine and tryptophan biosynthesis - Homo sapiens (human)	GOT2	glutamic-oxaloacetic	glutamic-oxaloacetic transaminase 2
hsa00400	Amino acid metabolism	Phenylalanine, tyrosine and tryptophan biosynthesis - Homo sapiens (human)	TAT	tyrosine	tyrosine aminotransferase
hsa00400	Amino acid metabolism	Phenylalanine, tyrosine and tryptophan biosynthesis - Homo sapiens (human)	IL4I1	interleukin	interleukin 4 induced 1
hsa00400	Amino acid metabolism	Phenylalanine, tyrosine and tryptophan biosynthesis - Homo sapiens (human)	PAH	phenylalanine	phenylalanine hydroxylase
hsa00410	Metabolism of other amino acids	beta-Alanine metabolism - Homo sapiens (human)	GADL1	glutamate	glutamate decarboxylase like 1
hsa00410	Metabolism of other amino acids	beta-Alanine metabolism - Homo sapiens (human)	CSAD	cysteine	cysteine sulfinic acid decarboxylase
hsa00410	Metabolism of other amino acids	beta-Alanine metabolism - Homo sapiens (human)	GAD1	glutamate	glutamate decarboxylase 1
hsa00410	Metabolism of other amino acids	beta-Alanine metabolism - Homo sapiens (human)	GAD2	glutamate	glutamate decarboxylase 2
hsa00410	Metabolism of other amino acids	beta-Alanine metabolism - Homo sapiens (human)	CNDP1	carnosine	carnosine dipeptidase 1
hsa00410	Metabolism of other amino acids	beta-Alanine metabolism - Homo sapiens (human)	CARNS1	carnosine	carnosine synthase 1
hsa00410	Metabolism of other amino acids	beta-Alanine metabolism - Homo sapiens (human)	CNDP2	carnosine	carnosine dipeptidase 2
hsa00410	Metabolism of other amino acids	beta-Alanine metabolism - Homo sapiens (human)	ABAT	4-aminobutyrate	4-aminobutyrate aminotransferase
hsa00410	Metabolism of other amino acids	beta-Alanine metabolism - Homo sapiens (human)	SMOX	spermine	spermine oxidase
hsa00410	Metabolism of other amino acids	beta-Alanine metabolism - Homo sapiens (human)	AOC3	amine	amine oxidase copper containing 3
hsa00410	Metabolism of other amino acids	beta-Alanine metabolism - Homo sapiens (human)	AOC2	amine	amine oxidase copper containing 2
hsa00410	Metabolism of other amino acids	beta-Alanine metabolism - Homo sapiens (human)	ALDH2	aldehyde	aldehyde dehydrogenase 2 family member
hsa00410	Metabolism of other amino acids	beta-Alanine metabolism - Homo sapiens (human)	ALDH3A2	aldehyde	aldehyde dehydrogenase 3 family member A2
hsa00410	Metabolism of other amino acids	beta-Alanine metabolism - Homo sapiens (human)	ALDH1B1	aldehyde	aldehyde dehydrogenase 1 family member B1
hsa00410	Metabolism of other amino acids	beta-Alanine metabolism - Homo sapiens (human)	ALDH7A1	aldehyde	aldehyde dehydrogenase 7 family member A1
hsa00410	Metabolism of other amino acids	beta-Alanine metabolism - Homo sapiens (human)	ALDH9A1	aldehyde	aldehyde dehydrogenase 9 family member A1
hsa00410	Metabolism of other amino acids	beta-Alanine metabolism - Homo sapiens (human)	ALDH3B1	aldehyde	aldehyde dehydrogenase 3 family member B1
hsa00410	Metabolism of other amino acids	beta-Alanine metabolism - Homo sapiens (human)	ALDH3B2	aldehyde	aldehyde dehydrogenase 3 family member B2
hsa00410	Metabolism of other amino acids	beta-Alanine metabolism - Homo sapiens (human)	ALDH3A1	aldehyde	aldehyde dehydrogenase 3 family member A1
hsa00410	Metabolism of other amino acids	beta-Alanine metabolism - Homo sapiens (human)	DPYD	dihydropyrimidine	dihydropyrimidine dehydrogenase
hsa00410	Metabolism of other amino acids	beta-Alanine metabolism - Homo sapiens (human)	DPYS	dihydropyrimidinase	dihydropyrimidinase
hsa00410	Metabolism of other amino acids	beta-Alanine metabolism - Homo sapiens (human)	UPB1	beta-ureidopropionase	beta-ureidopropionase 1
hsa00410	Metabolism of other amino acids	beta-Alanine metabolism - Homo sapiens (human)	HIBCH	3-hydroxyisobutyryl-CoA	3-hydroxyisobutyryl-CoA hydrolase
hsa00410	Metabolism of other amino acids	beta-Alanine metabolism - Homo sapiens (human)	HADHA	hydroxyacyl-CoA	hydroxyacyl-CoA dehydrogenase trifunctional multienzyme complex subunit alpha
hsa00410	Metabolism of other amino acids	beta-Alanine metabolism - Homo sapiens (human)	EHHADH	enoyl-CoA	enoyl-CoA hydratase and 3-hydroxyacyl CoA dehydrogenase
hsa00410	Metabolism of other amino acids	beta-Alanine metabolism - Homo sapiens (human)	ECHS1	enoyl-CoA	enoyl-CoA hydratase, short chain 1
hsa00410	Metabolism of other amino acids	beta-Alanine metabolism - Homo sapiens (human)	ACADS	acyl-CoA	acyl-CoA dehydrogenase short chain
hsa00410	Metabolism of other amino acids	beta-Alanine metabolism - Homo sapiens (human)	ACOX3	acyl-CoA	acyl-CoA oxidase 3, pristanoyl
hsa00410	Metabolism of other amino acids	beta-Alanine metabolism - Homo sapiens (human)	ACOX1	acyl-CoA	acyl-CoA oxidase 1
hsa00410	Metabolism of other amino acids	beta-Alanine metabolism - Homo sapiens (human)	MLYCD	malonyl-CoA	malonyl-CoA decarboxylase
hsa00410	Metabolism of other amino acids	beta-Alanine metabolism - Homo sapiens (human)	ALDH6A1	aldehyde	aldehyde dehydrogenase 6 family member A1
hsa00430	Metabolism of other amino acids	Taurine and hypotaurine metabolism - Homo sapiens (human)	CDO1	cysteine	cysteine dioxygenase type 1
hsa00430	Metabolism of other amino acids	Taurine and hypotaurine metabolism - Homo sapiens (human)	GAD1	glutamate	glutamate decarboxylase 1
hsa00430	Metabolism of other amino acids	Taurine and hypotaurine metabolism - Homo sapiens (human)	GAD2	glutamate	glutamate decarboxylase 2
hsa00430	Metabolism of other amino acids	Taurine and hypotaurine metabolism - Homo sapiens (human)	GADL1	glutamate	glutamate decarboxylase like 1
hsa00430	Metabolism of other amino acids	Taurine and hypotaurine metabolism - Homo sapiens (human)	CSAD	cysteine	cysteine sulfinic acid decarboxylase
hsa00430	Metabolism of other amino acids	Taurine and hypotaurine metabolism - Homo sapiens (human)	ADO	2-aminoethanethiol	2-aminoethanethiol dioxygenase
hsa00430	Metabolism of other amino acids	Taurine and hypotaurine metabolism - Homo sapiens (human)	FMO1	flavin	flavin containing dimethylaniline monoxygenase 1
hsa00430	Metabolism of other amino acids	Taurine and hypotaurine metabolism - Homo sapiens (human)	FMO2	flavin	flavin containing dimethylaniline monoxygenase 2
hsa00430	Metabolism of other amino acids	Taurine and hypotaurine metabolism - Homo sapiens (human)	FMO5	flavin	flavin containing dimethylaniline monoxygenase 5
hsa00430	Metabolism of other amino acids	Taurine and hypotaurine metabolism - Homo sapiens (human)	FMO3	flavin	flavin containing dimethylaniline monoxygenase 3
hsa00430	Metabolism of other amino acids	Taurine and hypotaurine metabolism - Homo sapiens (human)	FMO4	flavin	flavin containing dimethylaniline monoxygenase 4
hsa00430	Metabolism of other amino acids	Taurine and hypotaurine metabolism - Homo sapiens (human)	GGT7	gamma-glutamyltransferase	gamma-glutamyltransferase 7
hsa00430	Metabolism of other amino acids	Taurine and hypotaurine metabolism - Homo sapiens (human)	GGT6	gamma-glutamyltransferase	gamma-glutamyltransferase 6
hsa00430	Metabolism of other amino acids	Taurine and hypotaurine metabolism - Homo sapiens (human)	GGT1	gamma-glutamyltransferase	gamma-glutamyltransferase 1
hsa00430	Metabolism of other amino acids	Taurine and hypotaurine metabolism - Homo sapiens (human)	GGT5	gamma-glutamyltransferase	gamma-glutamyltransferase 5
hsa00430	Metabolism of other amino acids	Taurine and hypotaurine metabolism - Homo sapiens (human)	GGT2	inactive	inactive glutathione hydrolase 2
hsa00430	Metabolism of other amino acids	Taurine and hypotaurine metabolism - Homo sapiens (human)	BAAT	bile	bile acid-CoA:amino acid N-acyltransferase
hsa00440	Metabolism of other amino acids	Phosphonate and phosphinate metabolism - Homo sapiens (human)	PCYT2	phosphate	phosphate cytidylyltransferase 2, ethanolamine
hsa00440	Metabolism of other amino acids	Phosphonate and phosphinate metabolism - Homo sapiens (human)	EPT1	selenoprotein	selenoprotein I
hsa00440	Metabolism of other amino acids	Phosphonate and phosphinate metabolism - Homo sapiens (human)	CEPT1	choline/ethanolamine	choline/ethanolamine phosphotransferase 1
hsa00440	Metabolism of other amino acids	Phosphonate and phosphinate metabolism - Homo sapiens (human)	PCYT1B	phosphate	phosphate cytidylyltransferase 1B, choline
hsa00440	Metabolism of other amino acids	Phosphonate and phosphinate metabolism - Homo sapiens (human)	PCYT1A	phosphate	phosphate cytidylyltransferase 1A, choline
hsa00440	Metabolism of other amino acids	Phosphonate and phosphinate metabolism - Homo sapiens (human)	CHPT1	choline	choline phosphotransferase 1
[truncated: 382 more rows]

## Sheet: Table S2
Mature_mirna_id	Target_genes	Database	Pubmed_id
hsa-let-7a-2-3p	ACSM2A	mirtarbase	27418678
hsa-let-7a-2-3p	ACSM2B	mirtarbase	23824327 / 23313552 / 27418678
hsa-let-7a-2-3p	AGPAT5	mirtarbase	23592263
hsa-let-7a-2-3p	CAD	mirtarbase	23592263
hsa-let-7a-2-3p	NDUFS1	mirtarbase	23824327
hsa-let-7a-3p	AASDHPPT	mirtarbase	21572407
hsa-let-7a-3p	ACP1	mirtarbase	21572407
hsa-let-7a-3p	ADH1B	mirtarbase	23446348 / 21572407 / 23824327
hsa-let-7a-3p	ALDH1A3	mirtarbase	23313552
hsa-let-7a-3p	CS	mirtarbase	23622248
hsa-let-7a-3p	MSMO1	mirtarbase	23592263
hsa-let-7a-3p	SGMS1	mirtarbase	26701625
hsa-let-7a-5p	ACAD8	mirtarbase	23622248
hsa-let-7a-5p	ACER2	mirtarbase	24398324
hsa-let-7a-5p	ACP1	mirecords	19939273
hsa-let-7a-5p	ADH5	mirtarbase	23313552 / 26701625 / 27292025
hsa-let-7a-5p	ADSL	mirtarbase	23622248
hsa-let-7a-5p	AHCYL2	mirtarbase	23592263
hsa-let-7a-5p	AK4	mirtarbase	23446348 / 20371350
hsa-let-7a-5p	ALDH7A1	mirtarbase	23622248
hsa-let-7a-5p	AMD1	mirtarbase	23313552
hsa-let-7a-5p	AMPD2	mirtarbase	23622248
hsa-let-7a-5p	AOC2	mirtarbase	23622248
hsa-let-7a-5p	ARG2	mirtarbase	26989813
hsa-let-7a-5p	ATP6V1B2	mirtarbase	23622248
hsa-let-7a-5p	ATP6V1F	mirtarbase	23592263 / 24398324 / 26701625 / 27292025
hsa-let-7a-5p	ATP6V1G1	mirtarbase	22100165 / 22291592 / 23446348
hsa-let-7a-5p	BCAT1	mirtarbase	23622248
hsa-let-7a-5p	COX6B1	mirtarbase	23706177
hsa-let-7a-5p	CS	mirtarbase	23622248
hsa-let-7a-5p	CTPS1	mirtarbase	23313552
hsa-let-7a-5p	CYP2R1	mirtarbase	23622248
hsa-let-7a-5p	DEGS1	mirtarbase	23622248
hsa-let-7a-5p	ECHDC1	mirtarbase	21572407
hsa-let-7a-5p	EZH2	mirtarbase	22972404 / 23622248
hsa-let-7a-5p	FMO4	mirtarbase	23824327
hsa-let-7a-5p	FXN	mirtarbase	23592263
hsa-let-7a-5p	GATM	mirtarbase	26701625
hsa-let-7a-5p	GLO1	mirtarbase	23592263
hsa-let-7a-5p	GLUL	mirtarbase	23622248
hsa-let-7a-5p	IVD	mirtarbase	23622248
hsa-let-7a-5p	KMT2D	mirtarbase	24398324 / 21572407
hsa-let-7a-5p	LTA4H	mirtarbase	23622248
hsa-let-7a-5p	MARS2	mirtarbase	26701625
hsa-let-7a-5p	MT-ATP6	mirtarbase	23622248
hsa-let-7a-5p	MTHFD1	mirtarbase	23622248
hsa-let-7a-5p	NAT8L	mirtarbase	21572407
hsa-let-7a-5p	NDUFS2	mirtarbase	23622248
hsa-let-7a-5p	NEU3	mirtarbase	23622248
hsa-let-7a-5p	NME4	mirtarbase	23622248
hsa-let-7a-5p	NSD1	mirtarbase	24398324
hsa-let-7a-5p	NUDT5	mirtarbase	23622248
hsa-let-7a-5p	PAFAH2	mirtarbase	19536157
hsa-let-7a-5p	PGM2L1	mirtarbase	23592263
hsa-let-7a-5p	PKM	mirtarbase	26745603 / 28415668
hsa-let-7a-5p	PLCG2	mirtarbase	24398324 / 23446348
hsa-let-7a-5p	PLD3	mirtarbase	26701625
hsa-let-7a-5p	PLOD1	mirtarbase	23622248
hsa-let-7a-5p	PTGES2	mirtarbase	23622248
hsa-let-7a-5p	QDPR	mirtarbase	23592263
hsa-let-7a-5p	RRM1	mirtarbase	23592263
hsa-let-7a-5p	RRM2	mirtarbase	23335963 / 23622248 / 21572407
hsa-let-7a-5p	SETD7	mirtarbase	23622248
hsa-let-7a-5p	SHMT2	mirtarbase	23622248
hsa-let-7a-5p	SMOX	mirecords	19939273
hsa-let-7a-5p	SUOX	mirtarbase	21572407
hsa-let-7a-5p	UPP2	mirtarbase	23622248
hsa-let-7b-3p	AASDHPPT	mirtarbase	21572407
hsa-let-7b-3p	ACP1	mirtarbase	21572407
hsa-let-7b-3p	ADH1B	mirtarbase	23446348 / 21572407 / 23824327
hsa-let-7b-3p	ALDH1A3	mirtarbase	23313552
hsa-let-7b-3p	MSMO1	mirtarbase	23592263
hsa-let-7b-3p	SGMS1	mirtarbase	26701625
hsa-let-7b-5p	ACACA	mirtarbase	18668040 / 23622248
hsa-let-7b-5p	ACER2	mirtarbase	24398324
hsa-let-7b-5p	ACSL1	mirtarbase	18668040
hsa-let-7b-5p	ADCY1	mirtarbase	23622248
hsa-let-7b-5p	ADH5	mirtarbase	23313552 / 26701625 / 27292025
hsa-let-7b-5p	AGL	mirtarbase	18668040
hsa-let-7b-5p	AHCYL1	mirtarbase	23622248
hsa-let-7b-5p	AHCYL2	mirtarbase	23592263
hsa-let-7b-5p	AK4	mirtarbase	23446348 / 20371350
hsa-let-7b-5p	AKR1A1	mirtarbase	18668040
hsa-let-7b-5p	ALDH7A1	mirtarbase	23622248
hsa-let-7b-5p	AMD1	mirtarbase	23313552
hsa-let-7b-5p	APRT	mirtarbase	18668040
hsa-let-7b-5p	ASPA	mirtarbase	23622248
hsa-let-7b-5p	ATP6V0A1	mirtarbase	18668040
hsa-let-7b-5p	ATP6V1F	mirtarbase	18668040 / 23592263 / 24398324 / 26701625 / 27292025
hsa-let-7b-5p	ATP6V1G1	mirtarbase	22100165 / 22291592 / 23446348
hsa-let-7b-5p	BCAT1	mirtarbase	23622248
hsa-let-7b-5p	CA12	mirtarbase	18668040
hsa-let-7b-5p	CDIPT	mirtarbase	18668040
hsa-let-7b-5p	CKB	mirtarbase	23622248
hsa-let-7b-5p	CNDP2	mirtarbase	18668040
hsa-let-7b-5p	COX6B1	mirtarbase	23706177
hsa-let-7b-5p	COX7B	mirtarbase	18668040
hsa-let-7b-5p	CS	mirtarbase	18668040
hsa-let-7b-5p	CTPS1	mirtarbase	18668040 / 23313552
hsa-let-7b-5p	CYP1A2	mirtarbase	23622248
hsa-let-7b-5p	CYP2J2	mirtarbase	22761738
hsa-let-7b-5p	DCTD	mirtarbase	23622248
hsa-let-7b-5p	DCTPP1	mirtarbase	18668040
hsa-let-7b-5p	DHTKD1	mirtarbase	23622248
hsa-let-7b-5p	DLAT	mirtarbase	18668040
hsa-let-7b-5p	ECHDC1	mirtarbase	21572407
hsa-let-7b-5p	ELOVL1	mirtarbase	18668040
hsa-let-7b-5p	ENTPD4	mirtarbase	23622248
hsa-let-7b-5p	ENTPD6	mirtarbase	23622248
hsa-let-7b-5p	EZH2	mirtarbase	25611389
hsa-let-7b-5p	FADS2	mirtarbase	18668040 / 23622248
hsa-let-7b-5p	FLAD1	mirtarbase	18668040 / 23622248
hsa-let-7b-5p	FMO4	mirtarbase	23824327
hsa-let-7b-5p	FXN	mirtarbase	23592263
hsa-let-7b-5p	GAPDH	mirtarbase	23622248
hsa-let-7b-5p	GATM	mirtarbase	26701625
hsa-let-7b-5p	GGCT	mirtarbase	18668040
hsa-let-7b-5p	GLB1	mirtarbase	18668040
hsa-let-7b-5p	GLO1	mirtarbase	18668040 / 23592263
hsa-let-7b-5p	GPHN	mirtarbase	23622248
hsa-let-7b-5p	GPI	mirtarbase	23622248
hsa-let-7b-5p	GPX7	mirtarbase	17699775
hsa-let-7b-5p	GSR	mirtarbase	18668040 / 23622248
hsa-let-7b-5p	GYG1	mirtarbase	23622248
hsa-let-7b-5p	GYS1	mirtarbase	18668040
hsa-let-7b-5p	GYS2	mirtarbase	18668040
hsa-let-7b-5p	HADHA	mirtarbase	23622248
hsa-let-7b-5p	HK1	mirtarbase	23622248
hsa-let-7b-5p	HMGCS1	mirtarbase	23622248
hsa-let-7b-5p	IMPDH1	mirtarbase	18668040
hsa-let-7b-5p	IMPDH2	mirtarbase	18668040
hsa-let-7b-5p	INPPL1	mirtarbase	18668040
hsa-let-7b-5p	KMT2D	mirtarbase	24398324 / 21572407
hsa-let-7b-5p	LBR	mirtarbase	18668040
hsa-let-7b-5p	LPCAT3	mirtarbase	18668040
hsa-let-7b-5p	LPGAT1	mirtarbase	18668040
hsa-let-7b-5p	LPL	mirtarbase	18668040
hsa-let-7b-5p	LTA4H	mirtarbase	23622248
hsa-let-7b-5p	MARS2	mirtarbase	18668040 / 26701625
hsa-let-7b-5p	MAT2B	mirtarbase	18668040
hsa-let-7b-5p	MCAT	mirtarbase	18668040
hsa-let-7b-5p	MT-ATP6	mirtarbase	23622248
hsa-let-7b-5p	MT-ND4L	mirtarbase	23622248
hsa-let-7b-5p	NAT8L	mirtarbase	21572407
hsa-let-7b-5p	NDUFA10	mirtarbase	23622248
hsa-let-7b-5p	NME4	mirtarbase	23622248
hsa-let-7b-5p	NME6	mirtarbase	18668040
hsa-let-7b-5p	NSD1	mirtarbase	24398324
hsa-let-7b-5p	PAFAH1B3	mirtarbase	18668040
hsa-let-7b-5p	PAFAH2	mirtarbase	19536157
hsa-let-7b-5p	PAPSS1	mirtarbase	18668040
hsa-let-7b-5p	PCCB	mirtarbase	18668040
hsa-let-7b-5p	PCYT1A	mirtarbase	18668040
hsa-let-7b-5p	PCYT1B	mirtarbase	18668040
hsa-let-7b-5p	PCYT2	mirtarbase	23622248
hsa-let-7b-5p	PFKM	mirtarbase	23622248
hsa-let-7b-5p	PGM1	mirtarbase	23622248
hsa-let-7b-5p	PGM2L1	mirtarbase	23592263
hsa-let-7b-5p	PGM3	mirtarbase	18668040
hsa-let-7b-5p	PLCB3	mirtarbase	18668040
hsa-let-7b-5p	PLCG2	mirtarbase	24398324 / 23446348
hsa-let-7b-5p	PLD3	mirtarbase	26701625
hsa-let-7b-5p	PRPS1	mirtarbase	18668040
hsa-let-7b-5p	PTGES2	mirtarbase	23622248
hsa-let-7b-5p	PTGS2	mirtarbase	18668040
hsa-let-7b-5p	QDPR	mirtarbase	23592263
hsa-let-7b-5p	RDH10	mirtarbase	18668040
hsa-let-7b-5p	RPIA	mirtarbase	15131085
hsa-let-7b-5p	RRM1	mirtarbase	23592263
hsa-let-7b-5p	RRM2	mirtarbase	17699775 / 18668040 / 21572407
hsa-let-7b-5p	SC5D	mirtarbase	23622248
hsa-let-7b-5p	SCD	mirtarbase	18668040 / 23622248
hsa-let-7b-5p	SPR	mirtarbase	18668040
hsa-let-7b-5p	SUOX	mirtarbase	21572407
hsa-let-7b-5p	TST	mirtarbase	18668040
hsa-let-7b-5p	TYMS	mirtarbase	18668040
hsa-let-7b-5p	UCK1	mirtarbase	23622248
hsa-let-7b-5p	UCK2	mirtarbase	18668040
hsa-let-7b-5p	UGT8	mirtarbase	18668040
hsa-let-7b-5p	ZADH2	mirtarbase	18668040 / 23622248
hsa-let-7c*	ATP6V1F	mirtarbase	23622248
hsa-let-7c*	NMNAT2	mirtarbase	23622248
hsa-let-7c-3p	NDUFS1	mirtarbase	23824327
hsa-let-7c-3p	SHMT1	mirtarbase	23592263 / 22012620 / 27292025
hsa-let-7c-5p	ACER2	mirtarbase	24398324
hsa-let-7c-5p	ADH5	mirtarbase	23313552 / 26701625 / 27292025
hsa-let-7c-5p	AHCYL2	mirtarbase	23592263
hsa-let-7c-5p	AK4	mirtarbase	23446348 / 20371350
hsa-let-7c-5p	AMD1	mirtarbase	23313552
hsa-let-7c-5p	ATP6V1F	mirtarbase	23592263 / 24398324 / 26701625 / 27292025
hsa-let-7c-5p	ATP6V1G1	mirtarbase	22100165 / 22291592 / 23446348
hsa-let-7c-5p	COX6B1	mirtarbase	23706177
hsa-let-7c-5p	CTPS1	mirtarbase	23313552
hsa-let-7c-5p	DNMT1	mirtarbase	25074381
hsa-let-7c-5p	DOT1L	mirtarbase	23622248
hsa-let-7c-5p	ECHDC1	mirtarbase	21572407
hsa-let-7c-5p	ETNK2	mirtarbase	25074381
hsa-let-7c-5p	EZH2	mirtarbase	25074381
hsa-let-7c-5p	FMO4	mirtarbase	23824327
hsa-let-7c-5p	FXN	mirtarbase	23592263
hsa-let-7c-5p	GATM	mirtarbase	26701625
hsa-let-7c-5p	GLO1	mirtarbase	23592263
hsa-let-7c-5p	KMT2D	mirtarbase	24398324 / 21572407
hsa-let-7c-5p	LDHA	mirtarbase	23622248
hsa-let-7c-5p	LTA4H	mirtarbase	23622248
hsa-let-7c-5p	MARS2	mirtarbase	26701625
hsa-let-7c-5p	MT-ATP6	mirtarbase	23622248
hsa-let-7c-5p	MT-ND4L	mirtarbase	23622248
hsa-let-7c-5p	NAT8L	mirtarbase	21572407
hsa-let-7c-5p	NME4	mirtarbase	23622248
hsa-let-7c-5p	NSD1	mirtarbase	24398324
hsa-let-7c-5p	PAFAH2	mirtarbase	19536157
hsa-let-7c-5p	PGM2L1	mirtarbase	23592263
hsa-let-7c-5p	PLCG2	mirtarbase	24398324 / 23446348
hsa-let-7c-5p	PLD3	mirtarbase	26701625
hsa-let-7c-5p	PTGES2	mirtarbase	23622248
hsa-let-7c-5p	QDPR	mirtarbase	23592263
hsa-let-7c-5p	RRM1	mirtarbase	23592263
hsa-let-7c-5p	RRM2	mirtarbase	21572407
hsa-let-7c-5p	SETDB1	mirtarbase	25074381
hsa-let-7c-5p	SIRT1	mirtarbase	23622248
hsa-let-7c-5p	SUOX	mirtarbase	21572407
hsa-let-7c-5p	TAZ	mirtarbase	23622248
hsa-let-7d-3p	PDE2A	mirtarbase	27292025
hsa-let-7d-5p	ACER2	mirtarbase	24398324
hsa-let-7d-5p	ADCY9	mirtarbase	20371350
hsa-let-7d-5p	ADH5	mirtarbase	23313552 / 26701625 / 27292025
hsa-let-7d-5p	AHCYL2	mirtarbase	23592263
hsa-let-7d-5p	AK4	mirtarbase	23446348 / 20371350
hsa-let-7d-5p	AMD1	mirtarbase	23313552
hsa-let-7d-5p	ATP6V1F	mirtarbase	23592263 / 24398324 / 26701625 / 27292025
hsa-let-7d-5p	ATP6V1G1	mirtarbase	22100165 / 22291592 / 23446348
hsa-let-7d-5p	CBR4	mirtarbase	20371350
hsa-let-7d-5p	COX6B1	mirtarbase	23706177
hsa-let-7d-5p	CTPS1	mirtarbase	23313552
hsa-let-7d-5p	ECHDC1	mirtarbase	21572407
hsa-let-7d-5p	FMO4	mirtarbase	23824327
hsa-let-7d-5p	FXN	mirtarbase	23592263
hsa-let-7d-5p	GATM	mirtarbase	26701625
hsa-let-7d-5p	GLO1	mirtarbase	23592263
hsa-let-7d-5p	KMT2A	mirtarbase	20371350
hsa-let-7d-5p	KMT2D	mirtarbase	24398324 / 21572407
hsa-let-7d-5p	LBR	mirtarbase	20371350
hsa-let-7d-5p	MARS2	mirtarbase	26701625
hsa-let-7d-5p	NAT8L	mirtarbase	21572407
hsa-let-7d-5p	NSD1	mirtarbase	24398324
hsa-let-7d-5p	PAFAH2	mirtarbase	19536157
hsa-let-7d-5p	PGM2L1	mirtarbase	23592263
hsa-let-7d-5p	PLCG2	mirtarbase	24398324 / 23446348
hsa-let-7d-5p	PLD3	mirtarbase	26701625
hsa-let-7d-5p	QDPR	mirtarbase	23592263
hsa-let-7d-5p	RRM1	mirtarbase	23592263
hsa-let-7d-5p	RRM2	mirtarbase	21572407
hsa-let-7d-5p	SMOX	mirecords	19939273
hsa-let-7d-5p	SUOX	mirtarbase	21572407
hsa-let-7d-5p	TST	mirtarbase	20371350
hsa-let-7e-3p	AGPAT5	mirtarbase	23592263
hsa-let-7e-5p	ACER2	mirtarbase	24398324
hsa-let-7e-5p	ADH5	mirtarbase	23313552 / 26701625 / 27292025
hsa-let-7e-5p	AGMAT	mirtarbase	23622248
hsa-let-7e-5p	AHCYL2	mirtarbase	23592263
hsa-let-7e-5p	AK4	mirtarbase	23446348 / 20371350
hsa-let-7e-5p	AMD1	mirtarbase	23313552
hsa-let-7e-5p	AMPD2	mirtarbase	23622248
hsa-let-7e-5p	ATP6V1F	mirtarbase	23592263 / 24398324 / 26701625 / 27292025
hsa-let-7e-5p	ATP6V1G1	mirtarbase	22100165 / 22291592 / 23446348
hsa-let-7e-5p	CA5B	mirtarbase	23622248
hsa-let-7e-5p	COX10	mirtarbase	23622248
hsa-let-7e-5p	COX6B1	mirtarbase	23706177
hsa-let-7e-5p	CTPS1	mirtarbase	23313552
hsa-let-7e-5p	CYP2B6	mirtarbase	23622248
hsa-let-7e-5p	ECHDC1	mirtarbase	21572407
hsa-let-7e-5p	EZH2	mirtarbase	24100610
hsa-let-7e-5p	FMO4	mirtarbase	23824327
hsa-let-7e-5p	FXN	mirtarbase	23592263
hsa-let-7e-5p	GATM	mirtarbase	26701625
hsa-let-7e-5p	GLO1	mirtarbase	23592263
hsa-let-7e-5p	GLUL	mirtarbase	23622248
hsa-let-7e-5p	GMPS	mirtarbase	23622248
hsa-let-7e-5p	IVD	mirtarbase	23622248
hsa-let-7e-5p	KMT2D	mirtarbase	24398324 / 21572407
hsa-let-7e-5p	MARS2	mirtarbase	26701625
hsa-let-7e-5p	MSMO1	mirtarbase	23622248
hsa-let-7e-5p	MT-ATP6	mirtarbase	23622248
hsa-let-7e-5p	MTMR14	mirtarbase	23622248
hsa-let-7e-5p	NAT8L	mirtarbase	21572407
hsa-let-7e-5p	NDUFA3	mirtarbase	23622248
hsa-let-7e-5p	NDUFS5	mirtarbase	23622248
hsa-let-7e-5p	NME4	mirtarbase	23622248
hsa-let-7e-5p	NSD1	mirtarbase	24398324
hsa-let-7e-5p	PAFAH2	mirtarbase	19536157
hsa-let-7e-5p	PFAS	mirtarbase	23622248
hsa-let-7e-5p	PGD	mirtarbase	23622248
hsa-let-7e-5p	PGM2L1	mirtarbase	23592263
hsa-let-7e-5p	PLCG2	mirtarbase	24398324 / 23446348
hsa-let-7e-5p	PLD3	mirtarbase	26701625
hsa-let-7e-5p	PYCR1	mirtarbase	23622248
hsa-let-7e-5p	QDPR	mirtarbase	23592263
hsa-let-7e-5p	RRM1	mirtarbase	23592263
hsa-let-7e-5p	RRM2	mirtarbase	21572407
hsa-let-7e-5p	SCD	mirtarbase	23622248
hsa-let-7e-5p	SETD1A	mirtarbase	23622248
hsa-let-7e-5p	SQLE	mirtarbase	23622248
hsa-let-7e-5p	SUOX	mirtarbase	21572407
hsa-let-7e-5p	TXNRD1	mirtarbase	23622248
hsa-let-7e-5p	UROC1	mirtarbase	23622248
hsa-let-7f-1-3p	AASDHPPT	mirtarbase	21572407
hsa-let-7f-1-3p	ACP1	mirtarbase	21572407
hsa-let-7f-1-3p	ADH1B	mirtarbase	23446348 / 21572407 / 23824327
hsa-let-7f-1-3p	ALDH1A3	mirtarbase	23313552
hsa-let-7f-1-3p	MECR	mirtarbase	23622248
hsa-let-7f-1-3p	MSMO1	mirtarbase	23592263
hsa-let-7f-1-3p	SGMS1	mirtarbase	26701625
hsa-let-7f-2-3p	AASDHPPT	mirtarbase	21572407
hsa-let-7f-2-3p	ALDH1A3	mirtarbase	23313552
hsa-let-7f-2-3p	PANK3	mirtarbase	20371350
hsa-let-7f-2-3p	PCK1	mirtarbase	23824327 / 23313552 / 27418678 / 28735896
hsa-let-7f-2-3p	PGK1	mirtarbase	27418678
hsa-let-7f-5p	ACER2	mirtarbase	24398324
hsa-let-7f-5p	ADH5	mirtarbase	23313552 / 26701625 / 27292025
hsa-let-7f-5p	AHCYL2	mirtarbase	23592263
hsa-let-7f-5p	AK4	mirtarbase	23446348 / 20371350
hsa-let-7f-5p	ALDH7A1	mirtarbase	23622248
hsa-let-7f-5p	AMD1	mirtarbase	23313552
hsa-let-7f-5p	ASS1	mirecords	18560586
hsa-let-7f-5p	ATP6V1F	mirtarbase	23592263 / 24398324 / 26701625 / 27292025
hsa-let-7f-5p	ATP6V1G1	mirtarbase	22100165 / 22291592 / 23446348
hsa-let-7f-5p	COX6B1	mirtarbase	23706177
hsa-let-7f-5p	CTPS1	mirtarbase	23313552
hsa-let-7f-5p	CYP19A1	mirtarbase	22407818
hsa-let-7f-5p	ECHDC1	mirtarbase	21572407
hsa-let-7f-5p	FMO4	mirtarbase	23824327
hsa-let-7f-5p	FXN	mirtarbase	23592263
hsa-let-7f-5p	GALC	mirtarbase	22942087
hsa-let-7f-5p	GATM	mirtarbase	26701625
hsa-let-7f-5p	GLO1	mirtarbase	23592263
hsa-let-7f-5p	GLUL	mirtarbase	23622248
hsa-let-7f-5p	KMT2D	mirtarbase	24398324 / 21572407
hsa-let-7f-5p	MARS2	mirtarbase	26701625
hsa-let-7f-5p	NAT8L	mirtarbase	21572407
hsa-let-7f-5p	NSD1	mirtarbase	24398324
hsa-let-7f-5p	PAFAH2	mirtarbase	19536157
hsa-let-7f-5p	PGM2L1	mirtarbase	23592263
hsa-let-7f-5p	PLCG2	mirtarbase	24398324 / 23446348
hsa-let-7f-5p	PLD3	mirtarbase	26701625
hsa-let-7f-5p	QDPR	mirtarbase	23592263
hsa-let-7f-5p	RRM1	mirtarbase	23592263
hsa-let-7f-5p	RRM2	mirtarbase	21572407
hsa-let-7f-5p	SUOX	mirtarbase	21572407
hsa-let-7g-3p	ACSM2A	mirtarbase	27418678
hsa-let-7g-3p	ACSM2B	mirtarbase	23824327 / 23313552 / 27418678
hsa-let-7g-3p	AGPAT5	mirtarbase	23592263
hsa-let-7g-3p	CAD	mirtarbase	23592263
hsa-let-7g-3p	NDUFS1	mirtarbase	23824327
hsa-let-7g-5p	ACER2	mirtarbase	24398324
hsa-let-7g-5p	ADH5	mirtarbase	23313552 / 26701625 / 27292025
hsa-let-7g-5p	AHCYL2	mirtarbase	23592263
hsa-let-7g-5p	AK4	mirtarbase	23446348 / 20371350
hsa-let-7g-5p	AMD1	mirtarbase	23313552
hsa-let-7g-5p	ATP6V1F	mirtarbase	23592263 / 24398324 / 26701625 / 27292025
hsa-let-7g-5p	ATP6V1G1	mirtarbase	22100165 / 22291592 / 23446348
hsa-let-7g-5p	COX6B1	mirtarbase	23706177
hsa-let-7g-5p	CTPS1	mirtarbase	23313552
hsa-let-7g-5p	ECHDC1	mirtarbase	21572407
hsa-let-7g-5p	FMO4	mirtarbase	23824327
hsa-let-7g-5p	FXN	mirtarbase	23592263
hsa-let-7g-5p	GATM	mirtarbase	26701625
hsa-let-7g-5p	GLO1	mirtarbase	23592263
hsa-let-7g-5p	KMT2D	mirtarbase	24398324 / 21572407
hsa-let-7g-5p	MARS2	mirtarbase	26701625
hsa-let-7g-5p	NAT8L	mirtarbase	21572407
hsa-let-7g-5p	NSD1	mirtarbase	24398324
hsa-let-7g-5p	PAFAH2	mirtarbase	19536157
hsa-let-7g-5p	PGM2L1	mirtarbase	23592263
hsa-let-7g-5p	PLCG2	mirtarbase	24398324 / 23446348
hsa-let-7g-5p	PLD3	mirtarbase	26701625
hsa-let-7g-5p	QDPR	mirtarbase	23592263
hsa-let-7g-5p	RRM1	mirtarbase	23592263
hsa-let-7g-5p	RRM2	mirtarbase	23622248 / 21572407
hsa-let-7g-5p	SUOX	mirtarbase	21572407
hsa-let-7i-5p	ACER2	mirtarbase	24398324
hsa-let-7i-5p	ADH5	mirtarbase	23313552 / 26701625 / 27292025
hsa-let-7i-5p	AHCYL2	mirtarbase	23592263
hsa-let-7i-5p	AK4	mirtarbase	23446348 / 20371350
hsa-let-7i-5p	AMD1	mirtarbase	23313552
hsa-let-7i-5p	ATP6V1F	mirtarbase	23592263 / 24398324 / 26701625 / 27292025
hsa-let-7i-5p	ATP6V1G1	mirtarbase	22100165 / 22291592 / 23446348
hsa-let-7i-5p	COX6B1	mirtarbase	23706177
hsa-let-7i-5p	CTPS1	mirtarbase	23313552
hsa-let-7i-5p	ECHDC1	mirtarbase	21572407
hsa-let-7i-5p	FMO4	mirtarbase	23824327
hsa-let-7i-5p	FXN	mirtarbase	23592263
hsa-let-7i-5p	GATM	mirtarbase	26701625
hsa-let-7i-5p	GLO1	mirtarbase	23592263
hsa-let-7i-5p	KMT2D	mirtarbase	24398324 / 21572407
hsa-let-7i-5p	MARS2	mirtarbase	26701625
hsa-let-7i-5p	NAT8L	mirtarbase	21572407
hsa-let-7i-5p	NSD1	mirtarbase	24398324
hsa-let-7i-5p	PAFAH2	mirtarbase	19536157
hsa-let-7i-5p	PGM2L1	mirtarbase	23592263
hsa-let-7i-5p	PIK3C2A	mirtarbase	23622248
hsa-let-7i-5p	PLCG2	mirtarbase	24398324 / 23446348
hsa-let-7i-5p	PLD3	mirtarbase	26701625
hsa-let-7i-5p	QDPR	mirtarbase	23592263
hsa-let-7i-5p	RRM1	mirtarbase	23622248 / 23592263
hsa-let-7i-5p	RRM2	mirtarbase	21572407
hsa-let-7i-5p	SUOX	mirtarbase	21572407
hsa-miR-1-3p	ACADVL	mirtarbase	18668040
hsa-miR-1-3p	ACP2	mirtarbase	18668040
hsa-miR-1-3p	ADPGK	mirtarbase	18668040
hsa-miR-1-3p	AGMAT	mirtarbase	18668040
hsa-miR-1-3p	AKR1D1	mirtarbase	18668037
hsa-miR-1-3p	ALDH2	mirtarbase	18668040
hsa-miR-1-3p	ALPI	mirtarbase	23313552
hsa-miR-1-3p	AMDHD1	mirtarbase	18668037
hsa-miR-1-3p	ANPEP	mirtarbase	18668040
hsa-miR-1-3p	ARG1	mirtarbase	18668040
hsa-miR-1-3p	ATP6V0A1	mirtarbase	18668040
hsa-miR-1-3p	ATP6V1A	mirtarbase	18668040
hsa-miR-1-3p	ATP6V1B2	mirecords / mirtarbase	20144220 / 18668040 / 18668037
hsa-miR-1-3p	ATP6V1C1	mirtarbase	18668040
hsa-miR-1-3p	ATP6V1E1	mirtarbase	18668040
hsa-miR-1-3p	B4GALT1	mirtarbase	18668040
hsa-miR-1-3p	BCKDHB	mirtarbase	18668040
hsa-miR-1-3p	CA3	mirtarbase	18668037
hsa-miR-1-3p	CAD	mirtarbase	18668040
hsa-miR-1-3p	CBR4	mirtarbase	18668040
hsa-miR-1-3p	CERS2	mirtarbase	15685193 / 18668040 / 23592263
hsa-miR-1-3p	COQ6	mirtarbase	18668040
hsa-miR-1-3p	COQ7	mirtarbase	27292025
hsa-miR-1-3p	CPOX	mirtarbase	18668040
hsa-miR-1-3p	DCTPP1	mirtarbase	18668040
hsa-miR-1-3p	DGKH	mirtarbase	18668037
hsa-miR-1-3p	ECHS1	mirtarbase	18668037
hsa-miR-1-3p	EHMT1	mirtarbase	18668040
hsa-miR-1-3p	EHMT2	mirtarbase	18668040
hsa-miR-1-3p	ETNK1	mirtarbase	18668037
hsa-miR-1-3p	FADS1	mirtarbase	18668040
hsa-miR-1-3p	FASN	mirtarbase	24310399
hsa-miR-1-3p	FIG4	mirtarbase	18668037
hsa-miR-1-3p	G6PD	mirecords / mirtarbase	14697198 / 23921124 / 27861141 / 18668040 / 18668037
hsa-miR-1-3p	GCH1	mirecords / mirtarbase	15685193
hsa-miR-1-3p	GNPDA2	mirecords / mirtarbase	15685193 / 18668037
hsa-miR-1-3p	GNPNAT1	mirtarbase	18668040
hsa-miR-1-3p	GPD2	mirtarbase	18668040 / 18668037
hsa-miR-1-3p	GSTO1	mirtarbase	18668040
hsa-miR-1-3p	HACD2	mirtarbase	18668040
hsa-miR-1-3p	HACD3	mirtarbase	18668040
hsa-miR-1-3p	HADH	mirtarbase	18668040 / 18668037
hsa-miR-1-3p	HMOX1	mirtarbase	18668040
hsa-miR-1-3p	HSD17B11	mirtarbase	18668040
hsa-miR-1-3p	HSD17B8	mirtarbase	18668040
hsa-miR-1-3p	HSD3B7	mirtarbase	18668037
hsa-miR-1-3p	HYI	mirtarbase	18668040
hsa-miR-1-3p	IMPDH1	mirtarbase	18668040
hsa-miR-1-3p	INPP5F	mirecords / mirtarbase	15685193 / 18668037
hsa-miR-1-3p	LIPC	mirtarbase	18668037
hsa-miR-1-3p	MECR	mirtarbase	18668040
hsa-miR-1-3p	MINPP1	mirtarbase	18668040
hsa-miR-1-3p	MTHFD2	mirtarbase	18668040
hsa-miR-1-3p	MTHFS	mirtarbase	18668040
hsa-miR-1-3p	NDUFS1	mirtarbase	27292025
hsa-miR-1-3p	NDUFS4	mirtarbase	18668040
hsa-miR-1-3p	NT5C1B	mirtarbase	18668040 / 23592263
hsa-miR-1-3p	NT5C1B-RDH14	mirtarbase	23592263
hsa-miR-1-3p	NT5E	mirtarbase	18668040
hsa-miR-1-3p	OAT	mirecords / mirtarbase	15685193 / 18668040
hsa-miR-1-3p	OXCT1	mirtarbase	18668037
hsa-miR-1-3p	PAFAH1B3	mirtarbase	18668040
hsa-miR-1-3p	PGD	mirtarbase	23921124 / 18668040
hsa-miR-1-3p	PGM2	mirecords / mirtarbase	15685193
hsa-miR-1-3p	PIK3CA	mirtarbase	24486107
hsa-miR-1-3p	PLCB3	mirtarbase	18668040
hsa-miR-1-3p	PNP	mirtarbase	22068816 / 21701775 / 15685193 / 18668037 / 18668040
hsa-miR-1-3p	PPA2	mirtarbase	18668040
hsa-miR-1-3p	PSAT1	mirtarbase	18668040
hsa-miR-1-3p	PYGB	mirtarbase	18668040
hsa-miR-1-3p	RGN	mirtarbase	18668037
hsa-miR-1-3p	RRM1	mirtarbase	18668040
hsa-miR-1-3p	SPTLC3	mirtarbase	19536157
hsa-miR-1-3p	SUCLA2	mirtarbase	18668040
hsa-miR-1-3p	TAT	mirtarbase	18668037
hsa-miR-1-3p	TH	mirtarbase	25512392
hsa-miR-1-3p	TKT	mirtarbase	23921124 / 18668040
hsa-miR-1-3p	UGT8	mirtarbase	18668040
hsa-miR-1-5p	GALM	mirtarbase	23824327
hsa-miR-1-5p	PDE7A	mirtarbase	25955017
hsa-miR-100-3p	ASPA	mirtarbase	22100165
hsa-miR-100-3p	CEPT1	mirtarbase	22100165
hsa-miR-100-3p	DHCR24	mirtarbase	23313552
hsa-miR-100-3p	PGM2L1	mirtarbase	22291592
hsa-miR-100-3p	TAZ	mirtarbase	23824327
hsa-miR-100-5p	ACSL3	mirtarbase	23622248
hsa-miR-100-5p	AGPAT3	mirtarbase	23622248
hsa-miR-100-5p	ALDH9A1	mirtarbase	23622248
hsa-miR-100-5p	COX5A	mirtarbase	23622248
hsa-miR-100-5p	DNMT1	mirtarbase	23622248
hsa-miR-100-5p	FXN	mirtarbase	23622248
hsa-miR-100-5p	HACD3	mirtarbase	23622248
hsa-miR-100-5p	LDHB	mirtarbase	23622248
hsa-miR-100-5p	NDUFA2	mirtarbase	23622248
hsa-miR-100-5p	NDUFA9	mirtarbase	23622248
hsa-miR-100-5p	NDUFC2	mirtarbase	23622248
hsa-miR-100-5p	ODC1	mirtarbase	23622248
hsa-miR-100-5p	OXCT1	mirtarbase	23622248
hsa-miR-100-5p	PAFAH1B1	mirtarbase	23622248
hsa-miR-100-5p	PANK3	mirtarbase	23622248
hsa-miR-100-5p	PAPSS1	mirtarbase	23622248
hsa-miR-100-5p	PIKFYVE	mirtarbase	23622248
hsa-miR-100-5p	RRM2	mirtarbase	23622248
hsa-miR-100-5p	SAT1	mirtarbase	23622248
hsa-miR-100-5p	SEPSECS	mirtarbase	23622248
hsa-miR-100-5p	SRD5A3	mirtarbase	23622248
hsa-miR-101-3p	ADO	mirtarbase	20371350
hsa-miR-101-3p	AMD1	mirtarbase	23313552
hsa-miR-101-3p	CERK	mirtarbase	20371350
hsa-miR-101-3p	CERS2	mirtarbase	20371350
hsa-miR-101-3p	COX10	mirtarbase	23592263
hsa-miR-101-3p	CPS1	mirtarbase	23592263
hsa-miR-101-3p	DCTD	mirtarbase	20371350
hsa-miR-101-3p	DNMT3A	mirtarbase	23124077
hsa-miR-101-3p	EZH2	mirecords / mirtarbase	19008416 / 20478051 / 19258506 / 14697198 / 19625769 / 19043531 / 21368858 / 22450781 / 21932133 / 23557329 / 24211736 / 23962556 / 27620004 / 27966775 / 26718325 / 20712078 / 25614281 / 19818710
hsa-miR-101-3p	GCLC	mirtarbase	28416776
hsa-miR-101-3p	GFPT2	mirtarbase	20371350
hsa-miR-101-3p	GPAM	mirtarbase	20371350 / 23592263
hsa-miR-101-3p	L2HGDH	mirtarbase	23592263
hsa-miR-101-3p	LBR	mirtarbase	20371350
hsa-miR-101-3p	NT5C3A	mirtarbase	21572407
hsa-miR-101-3p	PAFAH1B1	mirtarbase	20371350
hsa-miR-101-3p	PANK1	mirtarbase	23313552
hsa-miR-101-3p	PCCB	mirtarbase	20371350
hsa-miR-101-3p	PIK3C2B	mirtarbase	23592263
hsa-miR-101-3p	PIK3CB	mirtarbase	26458815
hsa-miR-101-3p	PIK3CD	mirtarbase	26701625
hsa-miR-101-3p	PIP4K2A	mirtarbase	20371350
hsa-miR-101-3p	PIP5K1C	mirtarbase	20371350
hsa-miR-101-3p	PRDM16	mirtarbase	28416776
hsa-miR-101-3p	PTGS2	mirecords / mirtarbase	19133256 / 23013439 / 26556718 / 26530100 / 20712078
hsa-miR-101-3p	QDPR	mirtarbase	23592263
hsa-miR-101-3p	RRM2	mirtarbase	23592263
hsa-miR-101-3p	SACM1L	mirtarbase	20371350
hsa-miR-101-3p	SGPL1	mirtarbase	23592263
hsa-miR-101-3p	SHMT1	mirtarbase	27292025
hsa-miR-101-3p	UGT2A1	mirtarbase	22012620
hsa-miR-101-3p	UGT2A2	mirtarbase	22012620
hsa-miR-101-5p	CMPK1	mirtarbase	23446348
hsa-miR-101-5p	EZH2	mirtarbase	28000868
hsa-miR-101-5p	LIPA	mirtarbase	27292025
hsa-miR-101-5p	MAT2A	mirtarbase	21572407 / 20371350
hsa-miR-101-5p	NMNAT1	mirtarbase	23824327
hsa-miR-101-5p	PIP4K2C	mirtarbase	21572407
hsa-miR-101-5p	PPA1	mirtarbase	20371350
hsa-miR-103a-2-5p	ALDOA	mirtarbase	19536157
hsa-miR-103a-2-5p	GLO1	mirtarbase	21572407
hsa-miR-103a-2-5p	IDH3B	mirtarbase	23622248
hsa-miR-103a-2-5p	MTMR7	mirtarbase	19536157
hsa-miR-103a-2-5p	PDE3A	mirtarbase	19536157
hsa-miR-103a-2-5p	PIP5K1C	mirtarbase	19536157
hsa-miR-103a-2-5p	PLCG1	mirtarbase	26701625
hsa-miR-103a-2-5p	RETSAT	mirtarbase	19536157
hsa-miR-103a-2-5p	TAZ	mirtarbase	23824327
hsa-miR-103a-3p	AADAT	mirtarbase	20371350
hsa-miR-103a-3p	ALDH3B1	mirtarbase	23592263
hsa-miR-103a-3p	ASH1L	mirtarbase	20371350 / 21572407
hsa-miR-103a-3p	CA12	mirtarbase	20371350
hsa-miR-103a-3p	CKMT1A	mirtarbase	19536157
hsa-miR-103a-3p	CYP26B1	mirtarbase	20371350
hsa-miR-103a-3p	CYP2C8	mirtarbase	22723340
hsa-miR-103a-3p	ENPP2	mirtarbase	22012620
hsa-miR-103a-3p	ENPP4	mirtarbase	20371350
hsa-miR-103a-3p	ENTPD1	mirtarbase	21572407
hsa-miR-103a-3p	GPCPD1	mirtarbase	23446348
hsa-miR-103a-3p	GPD1	mirtarbase	15131085
hsa-miR-103a-3p	HDDC2	mirtarbase	21572407 / 20371350
hsa-miR-103a-3p	HPRT1	mirtarbase	20371350
hsa-miR-103a-3p	IDH3A	mirtarbase	23592263
hsa-miR-103a-3p	IPPK	mirtarbase	20371350
hsa-miR-103a-3p	L2HGDH	mirtarbase	24398324 / 23446348 / 21572407 / 20371350
hsa-miR-103a-3p	LBR	mirtarbase	20371350
hsa-miR-103a-3p	MTHFR	mirtarbase	20371350
hsa-miR-103a-3p	MTMR3	mirtarbase	20371350
hsa-miR-103a-3p	MTMR4	mirtarbase	20371350
hsa-miR-103a-3p	NNT	mirtarbase	23446348 / 21572407 / 27292025
hsa-miR-103a-3p	PAFAH1B2	mirtarbase	23446348 / 20371350
hsa-miR-103a-3p	PDE4D	mirtarbase	20371350
hsa-miR-103a-3p	PNPLA6	mirtarbase	20371350
hsa-miR-103a-3p	PTEN	mirtarbase	24828205 / 22593189
hsa-miR-103a-3p	RFK	mirtarbase	20371350
hsa-miR-103a-3p	SETD1B	mirtarbase	20371350
hsa-miR-103a-3p	SIRT4	mirtarbase	20371350
hsa-miR-103a-3p	SYNJ1	mirtarbase	20371350
hsa-miR-103a-3p	TK1	mirtarbase	23622248 / 23313552
hsa-miR-103b	CA12	mirtarbase	21572407 / 20371350
hsa-miR-103b	HSD17B12	mirtarbase	23824327
hsa-miR-103b	HSD3B7	mirtarbase	26701625
hsa-miR-105-5p	COX8A	mirtarbase	27292025
hsa-miR-105-5p	L2HGDH	mirtarbase	20371350
hsa-miR-105-5p	PAFAH1B1	mirtarbase	23824327
hsa-miR-105-5p	PTEN	mirtarbase	23592263
hsa-miR-105-5p	SCD	mirtarbase	23446348 / 21572407
hsa-miR-105-5p	TK1	mirtarbase	23313552
hsa-miR-106a-3p	ARSA	mirtarbase	27292025
hsa-miR-106a-3p	BCAT1	mirtarbase	23446348 / 20371350
hsa-miR-106a-3p	CTPS1	mirtarbase	23313552
hsa-miR-106a-3p	FIG4	mirtarbase	23824327
hsa-miR-106a-3p	G6PC	mirtarbase	23592263
hsa-miR-106a-3p	KMO	mirtarbase	23446348 / 22012620
hsa-miR-106a-3p	KMT2A	mirtarbase	23313552
hsa-miR-106a-3p	MOCS2	mirtarbase	19536157
hsa-miR-106a-3p	PDE3A	mirtarbase	19536157
hsa-miR-106a-3p	PTEN	mirtarbase	27510094
hsa-miR-106a-3p	PTGR2	mirtarbase	23824327
hsa-miR-106a-3p	SPTLC3	mirtarbase	27292025
hsa-miR-106a-5p	ACER2	mirtarbase	24398324
hsa-miR-106a-5p	ACOX1	mirtarbase	19536157
hsa-miR-106a-5p	ACSL4	mirtarbase	21572407
hsa-miR-106a-5p	AGMAT	mirtarbase	20371350 / 23313552
hsa-miR-106a-5p	ATP6V0E1	mirtarbase	27292025
hsa-miR-106a-5p	BHMT2	mirtarbase	23313552
hsa-miR-106a-5p	CDIPT	mirtarbase	19536157
hsa-miR-106a-5p	COX6B1	mirtarbase	20371350
hsa-miR-106a-5p	CPS1	mirtarbase	23313552
hsa-miR-106a-5p	CPT1A	mirtarbase	23313552
hsa-miR-106a-5p	CYCS	mirtarbase	23446348
hsa-miR-106a-5p	CYP19A1	mirtarbase	23438603
hsa-miR-106a-5p	DEGS1	mirtarbase	23824327
hsa-miR-106a-5p	DHODH	mirtarbase	23824327 / 23313552
hsa-miR-106a-5p	DLST	mirtarbase	23622248
hsa-miR-106a-5p	ENTPD4	mirtarbase	22927820
hsa-miR-106a-5p	FAHD1	mirtarbase	19536157
hsa-miR-106a-5p	GLO1	mirtarbase	21572407
hsa-miR-106a-5p	KCND3	mirtarbase	23313552
hsa-miR-106a-5p	KMT2B	mirtarbase	22012620 / 21572407 / 20371350
hsa-miR-106a-5p	LDHD	mirtarbase	23313552
hsa-miR-106a-5p	LIAS	mirtarbase	23824327 / 22927820
hsa-miR-106a-5p	MGST2	mirtarbase	25950430
hsa-miR-106a-5p	MSMO1	mirtarbase	21572407
hsa-miR-106a-5p	MTMR3	mirtarbase	23622248
hsa-miR-106a-5p	NAGK	mirtarbase	23446348 / 21572407 / 20371350
hsa-miR-106a-5p	NME6	mirtarbase	22012620
hsa-miR-106a-5p	OLAH	mirtarbase	27418678
hsa-miR-106a-5p	PDE4C	mirtarbase	23313552
hsa-miR-106a-5p	PDHB	mirtarbase	23313552
hsa-miR-106a-5p	PFKFB2	mirtarbase	22100165
hsa-miR-106a-5p	PFKP	mirtarbase	23446348 / 22012620 / 21572407 / 20371350
hsa-miR-106a-5p	PTEN	mirtarbase	24108762 / 26306906 / 26097565
hsa-miR-106a-5p	PTGIS	mirtarbase	23313552
hsa-miR-106a-5p	RDH11	mirtarbase	23622248
hsa-miR-106a-5p	RFK	mirtarbase	23313552
hsa-miR-106a-5p	RRM2	mirtarbase	23592263
hsa-miR-106a-5p	SCD	mirtarbase	21572407
hsa-miR-106a-5p	SDHA	mirtarbase	23622248
hsa-miR-106a-5p	SGMS1	mirtarbase	23592263
hsa-miR-106a-5p	SGPL1	mirtarbase	23592263
hsa-miR-106a-5p	SPTLC2	mirtarbase	22012620
hsa-miR-106a-5p	THEM4	mirtarbase	23313552
hsa-miR-106a-5p	TPK1	mirtarbase	22012620
hsa-miR-106a-5p	UGCG	mirtarbase	23592263
hsa-miR-106b-3p	CBS	mirtarbase	23622248
hsa-miR-106b-3p	GAPDH	mirtarbase	23622248
hsa-miR-106b-3p	GMPR	mirtarbase	19536157
hsa-miR-106b-3p	KDSR	mirtarbase	27418678
hsa-miR-106b-3p	KMT2C	mirtarbase	23622248
hsa-miR-106b-3p	MTMR3	mirtarbase	23622248
hsa-miR-106b-3p	PRDM2	mirtarbase	23622248
hsa-miR-106b-3p	PTEN	mirtarbase	28288092 / 26318586
hsa-miR-106b-3p	TKT	mirtarbase	23622248
hsa-miR-106b-3p	UQCR11	mirtarbase	23622248
hsa-miR-106b-5p	ACADSB	mirtarbase	22473208
hsa-miR-106b-5p	ACER2	mirtarbase	24398324
hsa-miR-106b-5p	ACOX1	mirtarbase	19536157
hsa-miR-106b-5p	ACSL4	mirtarbase	21572407
hsa-miR-106b-5p	ADH5	mirtarbase	23622248
hsa-miR-106b-5p	AGMAT	mirtarbase	20371350 / 23313552
hsa-miR-106b-5p	ALDH9A1	mirtarbase	22473208
hsa-miR-106b-5p	ATP6V0E1	mirtarbase	22473208 / 27292025
hsa-miR-106b-5p	BHMT2	mirtarbase	23313552
hsa-miR-106b-5p	CDIPT	mirtarbase	19536157
hsa-miR-106b-5p	CMPK1	mirtarbase	22473208
hsa-miR-106b-5p	COX6B1	mirtarbase	20371350
hsa-miR-106b-5p	CPOX	mirtarbase	22473208
hsa-miR-106b-5p	CPS1	mirtarbase	23313552
hsa-miR-106b-5p	CPT1A	mirtarbase	23313552
hsa-miR-106b-5p	CYCS	mirtarbase	23446348
hsa-miR-106b-5p	DCTPP1	mirtarbase	23622248
hsa-miR-106b-5p	DEGS1	mirtarbase	23824327
hsa-miR-106b-5p	DGKD	mirtarbase	23622248
hsa-miR-106b-5p	DHODH	mirtarbase	23824327 / 23313552
hsa-miR-106b-5p	ELOVL6	mirtarbase	23622248
hsa-miR-106b-5p	ENTPD4	mirtarbase	22927820
hsa-miR-106b-5p	EZH1	mirtarbase	22473208
hsa-miR-106b-5p	FAHD1	mirtarbase	19536157
hsa-miR-106b-5p	GLO1	mirtarbase	22473208 / 21572407
hsa-miR-106b-5p	GNPDA2	mirtarbase	17242205
hsa-miR-106b-5p	GPAM	mirtarbase	22473208
hsa-miR-106b-5p	HMGCL	mirtarbase	23622248
hsa-miR-106b-5p	INPP5F	mirtarbase	22473208
hsa-miR-106b-5p	ITPKB	mirtarbase	22473208
hsa-miR-106b-5p	KCND3	mirtarbase	23313552
hsa-miR-106b-5p	KMT2B	mirtarbase	22012620 / 21572407 / 20371350
hsa-miR-106b-5p	KMT2D	mirtarbase	23622248
hsa-miR-106b-5p	LDHD	mirtarbase	23313552
hsa-miR-106b-5p	LIAS	mirtarbase	23824327 / 22927820
hsa-miR-106b-5p	LPGAT1	mirtarbase	22473208
hsa-miR-106b-5p	MAT2A	mirtarbase	23622248
hsa-miR-106b-5p	MSMO1	mirtarbase	22473208 / 21572407
hsa-miR-106b-5p	MTHFD1	mirtarbase	23622248
hsa-miR-106b-5p	MTMR1	mirtarbase	23622248
hsa-miR-106b-5p	MTMR3	mirtarbase	22473208
hsa-miR-106b-5p	MTR	mirtarbase	23622248
hsa-miR-106b-5p	NAGK	mirtarbase	23446348 / 21572407 / 20371350
hsa-miR-106b-5p	NME6	mirtarbase	22012620
hsa-miR-106b-5p	NNT	mirtarbase	23622248
hsa-miR-106b-5p	OCRL	mirtarbase	22473208
hsa-miR-106b-5p	OLAH	mirtarbase	27418678
hsa-miR-106b-5p	PAFAH1B1	mirtarbase	22473208
hsa-miR-106b-5p	PANK3	mirtarbase	23622248 / 22473208
hsa-miR-106b-5p	PDE4C	mirtarbase	23313552
hsa-miR-106b-5p	PDHB	mirtarbase	23313552
hsa-miR-106b-5p	PFKFB2	mirtarbase	22100165
hsa-miR-106b-5p	PFKP	mirtarbase	22473208 / 23446348 / 22012620 / 21572407 / 20371350
hsa-miR-106b-5p	PGM2L1	mirtarbase	22473208
hsa-miR-106b-5p	PIP4K2A	mirtarbase	22473208
hsa-miR-106b-5p	PIP4K2C	mirtarbase	22473208
hsa-miR-106b-5p	PNPLA4	mirtarbase	22473208
hsa-miR-106b-5p	PTEN	mirtarbase	21283765 / 24842611 / 25041637 / 27270534 / 26238857 / 22473208
hsa-miR-106b-5p	PTGES3	mirtarbase	22473208
hsa-miR-106b-5p	PTGIS	mirtarbase	23313552
hsa-miR-106b-5p	RFK	mirtarbase	23313552
hsa-miR-106b-5p	RRM2	mirtarbase	22473208 / 23592263
hsa-miR-106b-5p	SCD	mirtarbase	21572407
hsa-miR-106b-5p	SETD2	mirtarbase	25714014 / 23622248
hsa-miR-106b-5p	SGMS1	mirtarbase	23592263
hsa-miR-106b-5p	SGPL1	mirtarbase	23592263
hsa-miR-106b-5p	SPTLC2	mirtarbase	22012620
hsa-miR-106b-5p	THEM4	mirtarbase	23313552
hsa-miR-106b-5p	TPK1	mirtarbase	22012620
hsa-miR-106b-5p	TXNRD2	mirtarbase	23622248
hsa-miR-106b-5p	UGCG	mirtarbase	23592263
hsa-miR-106b-5p	UGP2	mirtarbase	23622248
hsa-miR-106b-5p	UQCRFS1	mirtarbase	23622248
hsa-miR-106b-5p	UQCRQ	mirtarbase	23622248
hsa-miR-106b-5p	UXS1	mirtarbase	22473208
hsa-miR-107	ALDH3B1	mirtarbase	23592263
hsa-miR-107	ASH1L	mirtarbase	21572407
hsa-miR-107	CKMT1A	mirtarbase	19536157
hsa-miR-107	CYP2C8	mirtarbase	22723340
hsa-miR-107	ENPP2	mirtarbase	22012620
hsa-miR-107	ENTPD1	mirtarbase	21572407
hsa-miR-107	GPCPD1	mirtarbase	23446348
hsa-miR-107	HDDC2	mirtarbase	21572407 / 20371350
hsa-miR-107	HPRT1	mirtarbase	20371350
hsa-miR-107	IDH3A	mirtarbase	23592263
hsa-miR-107	L2HGDH	mirtarbase	24398324 / 23446348 / 21572407 / 20371350
hsa-miR-107	LBR	mirtarbase	20371350
hsa-miR-107	MTMR3	mirtarbase	20371350
hsa-miR-107	NNT	mirtarbase	23446348 / 21572407 / 27292025
hsa-miR-107	PAFAH1B2	mirtarbase	23446348 / 20371350
hsa-miR-107	PHGDH	mirtarbase	23622248
hsa-miR-107	PTEN	mirtarbase	22593189
hsa-miR-107	SAT1	mirtarbase	20489155
hsa-miR-107	SETD1B	mirtarbase	20371350
hsa-miR-107	TK1	mirtarbase	23313552
hsa-miR-107	ZADH2	mirtarbase	23622248
hsa-miR-10a-3p	ACLY	mirtarbase	23622248
hsa-miR-10a-3p	ATP6V1G1	mirtarbase	23313552
hsa-miR-10a-3p	GNPNAT1	mirtarbase	23592263
hsa-miR-10a-3p	UQCRFS1	mirtarbase	24398324 / 20371350
hsa-miR-10a-5p	ACAA1	mirtarbase	23622248
hsa-miR-10a-5p	ACAD8	mirtarbase	23313552
hsa-miR-10a-5p	ADCY9	mirtarbase	23622248
hsa-miR-10a-5p	AHCY	mirtarbase	23313552
hsa-miR-10a-5p	AHCYL2	mirtarbase	26701625
hsa-miR-10a-5p	ALDH1A2	mirtarbase	23622248
hsa-miR-10a-5p	AMPD1	mirtarbase	23622248
hsa-miR-10a-5p	AMPD2	mirtarbase	23622248
hsa-miR-10a-5p	APRT	mirtarbase	23622248
hsa-miR-10a-5p	ATIC	mirtarbase	27292025
hsa-miR-10a-5p	CHDH	mirtarbase	23824327
hsa-miR-10a-5p	CMPK1	mirtarbase	20371350 / 23446348 / 21572407
hsa-miR-10a-5p	COX7B	mirtarbase	23622248
hsa-miR-10a-5p	CYP8B1	mirtarbase	23622248
hsa-miR-10a-5p	DGAT1	mirtarbase	19536157
hsa-miR-10a-5p	ELOVL2	mirtarbase	20371350
hsa-miR-10a-5p	ELOVL7	mirtarbase	19536157
hsa-miR-10a-5p	FAHD1	mirtarbase	23824327
hsa-miR-10a-5p	FASN	mirtarbase	23622248
hsa-miR-10a-5p	GPCPD1	mirtarbase	23446348
hsa-miR-10a-5p	GSR	mirtarbase	23824327
hsa-miR-10a-5p	GSS	mirtarbase	22012620
hsa-miR-10a-5p	H6PD	mirtarbase	21572407
hsa-miR-10a-5p	HK1	mirtarbase	23622248
hsa-miR-10a-5p	LPIN3	mirtarbase	27292025
hsa-miR-10a-5p	LSS	mirtarbase	23622248
hsa-miR-10a-5p	MTR	mirtarbase	23622248
hsa-miR-10a-5p	NDUFB5	mirtarbase	21572407
hsa-miR-10a-5p	NDUFB6	mirtarbase	20371350
hsa-miR-10a-5p	OCRL	mirtarbase	23622248
hsa-miR-10a-5p	PAFAH1B1	mirtarbase	23446348
hsa-miR-10a-5p	PAICS	mirtarbase	21572407
hsa-miR-10a-5p	PANK2	mirtarbase	23622248
hsa-miR-10a-5p	PFAS	mirtarbase	23622248
hsa-miR-10a-5p	PIK3CG	mirtarbase	24522205
hsa-miR-10a-5p	PLA2G2C	mirtarbase	23446348
hsa-miR-10a-5p	PLA2G4A	mirtarbase	23622248
hsa-miR-10a-5p	PLA2G4F	mirtarbase	23622248
hsa-miR-10a-5p	PTEN	mirtarbase	24100613 / 26317552
hsa-miR-10a-5p	PYGL	mirtarbase	23622248
hsa-miR-10a-5p	SCD	mirtarbase	23622248
hsa-miR-10a-5p	SORD	mirtarbase	23622248
hsa-miR-10a-5p	SYNJ1	mirtarbase	23622248
hsa-miR-10a-5p	TPI1	mirtarbase	23622248
hsa-miR-10a-5p	UGDH	mirtarbase	22012620
hsa-miR-10b-3p	BTD	mirtarbase	22100165
hsa-miR-10b-3p	CYP2C19	mirtarbase	22012620 / 20371350 / 26701625 / 27292025
hsa-miR-10b-3p	HACD4	mirtarbase	19536157
hsa-miR-10b-5p	ACAD8	mirtarbase	23313552
hsa-miR-10b-5p	ACLY	mirtarbase	23622248
hsa-miR-10b-5p	AHCY	mirtarbase	23313552
hsa-miR-10b-5p	AHCYL2	mirtarbase	26701625
hsa-miR-10b-5p	ATIC	mirtarbase	27292025
hsa-miR-10b-5p	CHDH	mirtarbase	23824327
hsa-miR-10b-5p	CMPK1	mirtarbase	23446348 / 21572407 / 20371350
hsa-miR-10b-5p	DGAT1	mirtarbase	19536157
hsa-miR-10b-5p	DLAT	mirtarbase	23622248
hsa-miR-10b-5p	ELOVL7	mirtarbase	19536157
hsa-miR-10b-5p	FAHD1	mirtarbase	23824327
hsa-miR-10b-5p	FASN	mirtarbase	23622248
hsa-miR-10b-5p	GK	mirtarbase	23622248
hsa-miR-10b-5p	GPCPD1	mirtarbase	23446348
hsa-miR-10b-5p	GSR	mirtarbase	23824327
hsa-miR-10b-5p	GSS	mirtarbase	22012620
hsa-miR-10b-5p	H6PD	mirtarbase	21572407
hsa-miR-10b-5p	HK1	mirtarbase	23622248
hsa-miR-10b-5p	KL	mirtarbase	25988292
hsa-miR-10b-5p	LPIN3	mirtarbase	27292025
hsa-miR-10b-5p	LSS	mirtarbase	23622248
hsa-miR-10b-5p	NDUFB5	mirtarbase	21572407
hsa-miR-10b-5p	PAFAH1B1	mirtarbase	23446348
hsa-miR-10b-5p	PAICS	mirtarbase	21572407
hsa-miR-10b-5p	PFAS	mirtarbase	23622248
hsa-miR-10b-5p	PIK3CA	mirtarbase	25896413
hsa-miR-10b-5p	PIK3CD	mirtarbase	23622248
hsa-miR-10b-5p	PLA2G2C	mirtarbase	23446348
hsa-miR-10b-5p	PLA2G4F	mirtarbase	23622248
hsa-miR-10b-5p	PTEN	mirtarbase	23384558 / 24100613 / 27113763
hsa-miR-10b-5p	SETD7	mirtarbase	23622248
hsa-miR-10b-5p	UGDH	mirtarbase	22012620
hsa-miR-10b-5p	UROD	mirtarbase	23622248
hsa-miR-1178-3p	CYP2C8	mirtarbase	27292025
hsa-miR-1178-3p	SPTLC1	mirtarbase	21572407
hsa-miR-1178-5p	CYP27B1	mirtarbase	19536157
hsa-miR-1178-5p	H6PD	mirtarbase	27418678
hsa-miR-1178-5p	KMT2A	mirtarbase	27292025
hsa-miR-1178-5p	PHGDH	mirtarbase	20371350
hsa-miR-1178-5p	PISD	mirtarbase	24398324
hsa-miR-1179	ALDOA	mirtarbase	20371350
hsa-miR-1179	PHYKPL	mirtarbase	23592263
hsa-miR-1179	RFK	mirtarbase	27292025
hsa-miR-1179	SETD1B	mirtarbase	20371350 / 26701625
hsa-miR-1180-3p	ATIC	mirtarbase	23622248
hsa-miR-1180-3p	COX6B1	mirtarbase	19536157
hsa-miR-1180-3p	GPI	mirtarbase	23622248
hsa-miR-1180-3p	GRHPR	mirtarbase	23622248
hsa-miR-1180-3p	KMT2A	mirtarbase	27292025
hsa-miR-1180-5p	COX10	mirtarbase	23592263
hsa-miR-1180-5p	DHCR24	mirtarbase	19536157
hsa-miR-1180-5p	GFPT1	mirtarbase	21572407 / 20371350
hsa-miR-1180-5p	MTMR4	mirtarbase	23592263 / 21572407 / 26701625
hsa-miR-1180-5p	PDE4C	mirtarbase	22012620
hsa-miR-1182	H6PD	mirtarbase	27418678
hsa-miR-1182	TKFC	mirtarbase	27418678
hsa-miR-1183	AMACR	mirtarbase	20371350
hsa-miR-1183	ATP6V0A2	mirtarbase	20371350
hsa-miR-1183	IPMK	mirtarbase	23592263
hsa-miR-1183	TYRP1	mirtarbase	23592263 / 23446348 / 22012620 / 21572407 / 20371350 / 26701625 / 27292025
hsa-miR-1184	ENPP2	mirtarbase	22012620
hsa-miR-1184	GLUL	mirtarbase	23824327
hsa-miR-1184	GPCPD1	mirtarbase	23446348
hsa-miR-1184	GSTO2	mirtarbase	23706177
hsa-miR-1184	IDH3A	mirtarbase	23592263
hsa-miR-1184	PANK3	mirtarbase	23824327
hsa-miR-1184	PIKFYVE	mirtarbase	23824327
hsa-miR-1184	SETD1B	mirtarbase	23592263
hsa-miR-1184	UQCRFS1	mirtarbase	28735896
hsa-miR-1185-1-3p	AASDHPPT	mirtarbase	21572407
hsa-miR-1185-1-3p	ALDH1A3	mirtarbase	23313552
hsa-miR-1185-1-3p	PANK3	mirtarbase	20371350
hsa-miR-1185-1-3p	PCK1	mirtarbase	23824327 / 23313552 / 27418678 / 28735896
hsa-miR-1185-1-3p	PFKFB2	mirtarbase	24374217
hsa-miR-1185-1-3p	PGK1	mirtarbase	27418678
hsa-miR-1185-2-3p	AASDHPPT	mirtarbase	21572407
hsa-miR-1185-2-3p	ALDH1A3	mirtarbase	23313552
hsa-miR-1185-2-3p	PANK3	mirtarbase	20371350
hsa-miR-1185-2-3p	PCK1	mirtarbase	23824327 / 23313552 / 27418678 / 28735896
hsa-miR-1185-2-3p	PFKFB2	mirtarbase	24374217
hsa-miR-1185-2-3p	PGK1	mirtarbase	27418678
hsa-miR-1185-5p	MAT2A	mirtarbase	23592263
hsa-miR-1185-5p	PIP4K2C	mirtarbase	26701625
hsa-miR-1193	FXN	mirtarbase	27418678
hsa-miR-1197	EPHX2	mirtarbase	23313552
hsa-miR-1197	PIP5K1C	mirtarbase	19536157
hsa-miR-1197	PSAP	mirtarbase	26701625
hsa-miR-1197	UGT8	mirtarbase	23313552 / 27418678
hsa-miR-1199-5p	CYB5R4	mirtarbase	19536157
hsa-miR-1199-5p	GFPT1	mirtarbase	23313552
hsa-miR-1199-5p	PFKM	mirtarbase	23824327
hsa-miR-1199-5p	PIP5K1C	mirtarbase	21572407
hsa-miR-1199-5p	PLA2G4D	mirtarbase	22012620 / 26701625
hsa-miR-1199-5p	VKORC1	mirtarbase	19536157
hsa-miR-1200	CPS1	mirtarbase	23313552
hsa-miR-1200	CYP2U1	mirtarbase	23824327
hsa-miR-1200	DHODH	mirtarbase	19536157
hsa-miR-1200	ENPP4	mirtarbase	21572407
hsa-miR-1200	KDSR	mirtarbase	23824327 / 27292025
hsa-miR-1200	LCLAT1	mirtarbase	23592263
hsa-miR-1200	LYPLA2	mirtarbase	23592263 / 26701625
hsa-miR-1200	MTHFD1	mirtarbase	27418678
hsa-miR-1200	NT5C2	mirtarbase	23824327
hsa-miR-1200	PCCB	mirtarbase	23824327
hsa-miR-1200	PIP5K1A	mirtarbase	21572407
hsa-miR-1200	PLCE1	mirtarbase	23824327
hsa-miR-1200	RDH13	mirtarbase	23824327
hsa-miR-1200	SPTLC2	mirtarbase	27418678
hsa-miR-1200	UGT8	mirtarbase	23824327
hsa-miR-1200	UQCRB	mirtarbase	23824327
hsa-miR-1202	CBS	mirtarbase	20371350
hsa-miR-1202	CHAC1	mirtarbase	23592263
hsa-miR-1202	SDR16C5	mirtarbase	22012620
hsa-miR-1203	DOT1L	mirtarbase	26701625
hsa-miR-1203	MGAM	mirtarbase	23824327
hsa-miR-1203	PDE4C	mirtarbase	20371350
hsa-miR-1204	CERS1	mirtarbase	20371350
hsa-miR-1204	SGPL1	mirtarbase	23592263
hsa-miR-1205	ENPP2	mirtarbase	22012620
hsa-miR-1205	GSTO2	mirtarbase	23706177
hsa-miR-1205	HACD2	mirtarbase	23592263
hsa-miR-1205	HSD17B12	mirtarbase	22100165 / 22291592 / 24398324
hsa-miR-1205	PISD	mirtarbase	24398324
hsa-miR-1205	PKM	mirtarbase	26701625
hsa-miR-1205	SETD1B	mirtarbase	23592263
hsa-miR-1206	ACSL6	mirtarbase	23824327
hsa-miR-1206	NAGK	mirtarbase	23824327
hsa-miR-1206	SRD5A1	mirtarbase	23824327
hsa-miR-1206	TXNRD1	mirtarbase	20371350
hsa-miR-1206	UGDH	mirtarbase	23824327
hsa-miR-1207-3p	COX17	mirtarbase	23824327
hsa-miR-1207-3p	COX6B1	mirtarbase	23313552
hsa-miR-1207-3p	DGKH	mirtarbase	23824327
hsa-miR-1207-3p	ENTPD4	mirtarbase	19536157
hsa-miR-1207-3p	LRTOMT	mirtarbase	23824327
hsa-miR-1207-3p	PIK3CB	mirtarbase	27292025
hsa-miR-1207-5p	ACACA	mirtarbase	26701625
hsa-miR-1207-5p	ADO	mirtarbase	23592263
hsa-miR-1207-5p	AKR1A1	mirtarbase	28735896
hsa-miR-1207-5p	B4GALT1	mirtarbase	23592263
hsa-miR-1207-5p	CHAC1	mirtarbase	23592263
hsa-miR-1207-5p	CYCS	mirtarbase	23824327
hsa-miR-1207-5p	DHTKD1	mirtarbase	23824327
hsa-miR-1207-5p	LHPP	mirtarbase	23592263 / 23446348 / 21572407
hsa-miR-1207-5p	NDUFB11	mirtarbase	27292025
hsa-miR-1207-5p	PDE3A	mirtarbase	23824327 / 23313552
hsa-miR-1207-5p	PGAM1	mirtarbase	26701625
hsa-miR-1207-5p	PGAM4	mirtarbase	23592263
hsa-miR-1207-5p	PIP4K2A	mirtarbase	23592263
hsa-miR-1207-5p	PLA2G4A	mirtarbase	23313552
hsa-miR-1207-5p	PTGES2	mirtarbase	26701625
hsa-miR-1207-5p	SETD1B	mirtarbase	23592263
hsa-miR-1207-5p	TPI1	mirtarbase	23592263 / 26701625
hsa-miR-1208	AMACR	mirtarbase	20371350
hsa-miR-1208	DOT1L	mirtarbase	26701625
hsa-miR-1208	IVD	mirtarbase	23446348
hsa-miR-1208	PSPH	mirtarbase	27418678
hsa-miR-122-3p	ALDH5A1	mirtarbase	23824327
hsa-miR-122-3p	AMD1	mirtarbase	26701625
hsa-miR-122-3p	MCAT	mirtarbase	27855320
hsa-miR-122-3p	PFAS	mirtarbase	23592263 / 23446348
hsa-miR-122-3p	SHMT1	mirtarbase	20371350
hsa-miR-122-3p	SOAT1	mirtarbase	27292025
hsa-miR-122-3p	TIGAR	mirtarbase	21572407
hsa-miR-122-5p	AACS	mirecords / mirtarbase	19296470
hsa-miR-122-5p	ACER2	mirtarbase	24398324
hsa-miR-122-5p	ADCY2	mirtarbase	23824327
hsa-miR-122-5p	ADO	mirtarbase	17612493
hsa-miR-122-5p	AK3	mirtarbase	27292025
hsa-miR-122-5p	ALDOA	mirecords / mirtarbase	18073344 / 19296470
hsa-miR-122-5p	ARSA	mirtarbase	27292025
hsa-miR-122-5p	B4GALT1	mirtarbase	17612493
hsa-miR-122-5p	BPGM	mirtarbase	17612493
hsa-miR-122-5p	CHDH	mirtarbase	23824327
hsa-miR-122-5p	CNDP1	mirtarbase	23824327
hsa-miR-122-5p	CS	mirecords / mirtarbase	19296470 / 23592263
hsa-miR-122-5p	CTPS1	mirtarbase	17612493
hsa-miR-122-5p	CYP3A5	mirtarbase	22100165
hsa-miR-122-5p	CYP7A1	mirtarbase	20351063
hsa-miR-122-5p	DBT	mirtarbase	27292025
hsa-miR-122-5p	DGKE	mirtarbase	23824327
hsa-miR-122-5p	ENTPD1	mirtarbase	23824327
hsa-miR-122-5p	ENTPD4	mirecords / mirtarbase	19296470
hsa-miR-122-5p	FIG4	mirtarbase	23824327
hsa-miR-122-5p	G6PC	mirtarbase	23592263
hsa-miR-122-5p	G6PC3	mirecords / mirtarbase	19296470 / 17612493
hsa-miR-122-5p	GFPT1	mirtarbase	27418678
hsa-miR-122-5p	GLUL	mirtarbase	23446348
hsa-miR-122-5p	GNPDA2	mirtarbase	17612493
hsa-miR-122-5p	GSTM3	mirtarbase	21750653
hsa-miR-122-5p	GYS1	mirecords / mirtarbase	18073344 / 17612493
hsa-miR-122-5p	HACD4	mirtarbase	23824327
hsa-miR-122-5p	HCCS	mirtarbase	21750653
hsa-miR-122-5p	HDDC2	mirtarbase	21572407
hsa-miR-122-5p	HMOX1	mirtarbase	20633528 / 17612493
hsa-miR-122-5p	LPIN1	mirtarbase	28287811
hsa-miR-122-5p	LRAT	mirtarbase	23824327
hsa-miR-122-5p	MOGAT1	mirtarbase	23824327 / 23313552
hsa-miR-122-5p	MOGAT3	mirtarbase	27292025
hsa-miR-122-5p	MRI1	mirtarbase	23824327
hsa-miR-122-5p	MTAP	mirtarbase	23824327
hsa-miR-122-5p	NAGK	mirtarbase	23824327
hsa-miR-122-5p	NMNAT2	mirtarbase	17612493
hsa-miR-122-5p	NT5C3A	mirtarbase	23055569
hsa-miR-122-5p	P4HA1	mirtarbase	23178710
hsa-miR-122-5p	PFKFB2	mirtarbase	17612493
hsa-miR-122-5p	PIP4K2A	mirtarbase	17612493
hsa-miR-122-5p	PKM	mirtarbase	24466275 / 17612493 / 23592263
hsa-miR-122-5p	PSPH	mirtarbase	21750653
hsa-miR-122-5p	PTGR2	mirtarbase	23824327
hsa-miR-122-5p	QPRT	mirtarbase	23824327
hsa-miR-122-5p	SPTLC1	mirtarbase	17612493
hsa-miR-122-5p	SPTLC3	mirtarbase	19536157
hsa-miR-122-5p	SUCLA2	mirtarbase	17612493
hsa-miR-122-5p	UROS	mirtarbase	27292025
hsa-miR-1224-3p	ADK	mirtarbase	23824327
hsa-miR-1224-3p	AGMAT	mirtarbase	20371350 / 23824327
hsa-miR-1224-3p	AHCY	mirtarbase	26701625
hsa-miR-1224-3p	AMDHD2	mirtarbase	22012620
hsa-miR-1224-3p	CYP2B6	mirtarbase	23824327
hsa-miR-1224-3p	DEGS1	mirtarbase	23824327
hsa-miR-1224-3p	DHCR24	mirtarbase	19536157
hsa-miR-1224-3p	EZH2	mirtarbase	23824327
hsa-miR-1224-3p	FXN	mirtarbase	23824327
hsa-miR-1224-3p	GM2A	mirtarbase	19536157
hsa-miR-1224-3p	GNPNAT1	mirtarbase	23592263
hsa-miR-1224-3p	HLCS	mirtarbase	19536157
hsa-miR-1224-3p	KMT2B	mirtarbase	21572407
hsa-miR-1224-3p	KMT2D	mirtarbase	23622248
hsa-miR-1224-3p	L2HGDH	mirtarbase	23592263
hsa-miR-1224-3p	LIPG	mirtarbase	23824327
hsa-miR-1224-3p	MGST3	mirtarbase	23824327
hsa-miR-1224-3p	NDUFV3	mirtarbase	23824327
hsa-miR-1224-3p	NNT	mirtarbase	23824327
hsa-miR-1224-3p	NSD1	mirtarbase	23446348 / 21572407 / 20371350 / 26701625 / 27292025
hsa-miR-1224-3p	NUDT5	mirtarbase	22012620
hsa-miR-1224-3p	NUDT9	mirtarbase	27292025
hsa-miR-1224-3p	PDE6A	mirtarbase	23824327
hsa-miR-1224-3p	PDE7A	mirtarbase	23824327
hsa-miR-1224-3p	PI4K2B	mirtarbase	23824327 / 23313552
hsa-miR-1224-3p	PIK3C2A	mirtarbase	23824327
hsa-miR-1224-3p	PLCG2	mirtarbase	24398324 / 20371350 / 24906430 / 26701625 / 27418678
hsa-miR-1224-3p	PSAT1	mirtarbase	23592263 / 23446348 / 20371350
hsa-miR-1224-3p	PTGIS	mirtarbase	23313552
hsa-miR-1224-3p	SCD	mirtarbase	20371350
hsa-miR-1224-3p	UMPS	mirtarbase	23824327
hsa-miR-1224-5p	ALDH1A3	mirtarbase	19536157
hsa-miR-1224-5p	HMGCS1	mirtarbase	23824327
hsa-miR-1224-5p	KMT2D	mirtarbase	21572407 / 20371350
hsa-miR-1224-5p	NDUFA2	mirtarbase	23592263
hsa-miR-1224-5p	NMNAT2	mirtarbase	23824327
hsa-miR-1224-5p	PDE3A	mirtarbase	22100165
hsa-miR-1224-5p	TMEM189-UBE2V1	mirtarbase	23592263 / 21572407
hsa-miR-1224-5p	VNN1	mirtarbase	22100165
hsa-miR-1225-3p	ADCY9	mirtarbase	23592263
hsa-miR-1225-3p	AHCYL2	mirtarbase	21572407 / 26701625
hsa-miR-1225-3p	ALDOA	mirtarbase	26701625 / 27292025
hsa-miR-1225-3p	B4GALT1	mirtarbase	23313552
hsa-miR-1225-3p	CYB5R4	mirtarbase	19536157
hsa-miR-1225-3p	MTMR1	mirtarbase	19536157
hsa-miR-1225-3p	NDUFA7	mirtarbase	20371350
hsa-miR-1225-3p	NDUFB11	mirtarbase	27292025
hsa-miR-1225-3p	PDE11A	mirtarbase	23592263
hsa-miR-1225-3p	PLA2G4D	mirtarbase	22012620 / 26701625
hsa-miR-1225-3p	SGPP2	mirtarbase	23592263
hsa-miR-1225-5p	GALK1	mirtarbase	23622248
hsa-miR-1225-5p	L2HGDH	mirtarbase	20371350 / 21572407
hsa-miR-1225-5p	NNT	mirtarbase	23446348 / 21572407 / 27292025
hsa-miR-1226-3p	AKR1B1	mirtarbase	23622248
hsa-miR-1226-3p	ALDH1B1	mirtarbase	23622248
hsa-miR-1226-3p	DHTKD1	mirtarbase	23824327
hsa-miR-1226-3p	DUT	mirtarbase	23622248
hsa-miR-1226-3p	EHHADH	mirtarbase	23622248
hsa-miR-1226-3p	GLUD2	mirtarbase	23622248
hsa-miR-1226-3p	GNPNAT1	mirtarbase	23592263
hsa-miR-1226-3p	GPX1	mirtarbase	23592263 / 26701625
hsa-miR-1226-3p	IDH1	mirtarbase	23622248
hsa-miR-1226-3p	INMT	mirtarbase	23313552
hsa-miR-1226-3p	ITPA	mirtarbase	28735896
hsa-miR-1226-3p	MOCOS	mirtarbase	23824327
hsa-miR-1226-3p	NDUFA10	mirtarbase	23824327 / 28735896
hsa-miR-1226-3p	NDUFA5	mirtarbase	23622248
hsa-miR-1226-3p	NDUFS7	mirtarbase	27292025
hsa-miR-1226-3p	NDUFV3	mirtarbase	23622248
hsa-miR-1226-3p	PANK3	mirtarbase	23622248
hsa-miR-1226-3p	PCYT1A	mirtarbase	19536157
hsa-miR-1226-3p	PFKL	mirtarbase	23622248
hsa-miR-1226-3p	PIP5K1A	mirtarbase	23622248
hsa-miR-1226-3p	QPRT	mirtarbase	23622248
hsa-miR-1226-3p	SGPL1	mirtarbase	23622248
hsa-miR-1226-5p	AGK	mirtarbase	22012620
hsa-miR-1226-5p	ATP6AP1	mirtarbase	23622248
hsa-miR-1226-5p	G6PC3	mirtarbase	27292025
hsa-miR-1227-3p	ACAD8	mirtarbase	23824327
hsa-miR-1227-3p	ADH5	mirtarbase	23313552 / 26701625 / 27292025
hsa-miR-1227-3p	ALDOA	mirtarbase	27292025
hsa-miR-1227-3p	CBS	mirtarbase	26701625 / 27292025
hsa-miR-1227-3p	CDS2	mirtarbase	19536157
hsa-miR-1227-3p	FAHD1	mirtarbase	23313552 / 26701625
hsa-miR-1227-3p	GSR	mirtarbase	23706177
hsa-miR-1227-3p	HSD17B12	mirtarbase	23313552
hsa-miR-1227-3p	KMT2A	mirtarbase	23622248
hsa-miR-1227-3p	LRTOMT	mirtarbase	23706177
hsa-miR-1227-3p	MOGAT1	mirtarbase	23313552
hsa-miR-1227-3p	MSMO1	mirtarbase	27292025
hsa-miR-1227-3p	NDUFC2-KCTD14	mirtarbase	23708386
hsa-miR-1227-3p	NME6	mirtarbase	22012620
hsa-miR-1227-3p	NMNAT1	mirtarbase	19536157
hsa-miR-1227-3p	PRPS1	mirtarbase	27292025
hsa-miR-1227-3p	RDH13	mirtarbase	23824327
hsa-miR-1227-3p	SEPHS1	mirtarbase	20371350
hsa-miR-1227-3p	UGT8	mirtarbase	23824327
hsa-miR-1227-5p	COLGALT1	mirtarbase	26701625
hsa-miR-1227-5p	DOT1L	mirtarbase	26701625
hsa-miR-1227-5p	ELOVL5	mirtarbase	23592263
hsa-miR-1227-5p	KMT2D	mirtarbase	23592263 / 26701625 / 27292025
hsa-miR-1228-3p	AASDHPPT	mirtarbase	23824327
hsa-miR-1228-3p	ACADL	mirtarbase	23592263
hsa-miR-1228-3p	ACOX1	mirtarbase	19536157
hsa-miR-1228-3p	ALDH1B1	mirtarbase	23313552
hsa-miR-1228-3p	ATP6V0E1	mirtarbase	23824327
hsa-miR-1228-3p	ATP6V1G3	mirtarbase	23824327
hsa-miR-1228-3p	CA8	mirtarbase	23824327 / 19536157
hsa-miR-1228-3p	GGCX	mirtarbase	23824327
hsa-miR-1228-3p	GSR	mirtarbase	23824327 / 19536157
hsa-miR-1228-3p	HIBADH	mirtarbase	23824327
hsa-miR-1228-3p	ITPKB	mirtarbase	23824327
hsa-miR-1228-3p	IVD	mirtarbase	23824327
hsa-miR-1228-3p	LIPG	mirtarbase	19536157
hsa-miR-1228-3p	ME2	mirtarbase	27292025
hsa-miR-1228-3p	MIOX	mirtarbase	23824327
hsa-miR-1228-3p	NMRK1	mirtarbase	23824327
hsa-miR-1228-3p	NPR1	mirtarbase	23313552
hsa-miR-1228-3p	NUDT16	mirtarbase	23824327 / 19536157
hsa-miR-1228-3p	PLA2G4A	mirtarbase	23824327
hsa-miR-1228-3p	PNPLA3	mirtarbase	23446348
hsa-miR-1228-3p	PTGIS	mirtarbase	23824327
hsa-miR-1228-3p	RDH13	mirtarbase	19536157
hsa-miR-1228-3p	SEPHS1	mirtarbase	21572407
hsa-miR-1228-3p	SPTLC2	mirtarbase	23824327
hsa-miR-1228-3p	TMEM189-UBE2V1	mirtarbase	20371350
hsa-miR-1228-3p	UGDH	mirtarbase	23824327
hsa-miR-1228-5p	DHTKD1	mirtarbase	23824327
hsa-miR-1228-5p	MIF	mirtarbase	28465246
hsa-miR-1228-5p	NPR1	mirtarbase	23824327
hsa-miR-1229-3p	ACLY	mirtarbase	23622248
hsa-miR-1229-3p	ACOT7	mirtarbase	23622248
hsa-miR-1229-3p	AHCYL1	mirtarbase	23622248
hsa-miR-1229-3p	CDIPT	mirtarbase	23622248
hsa-miR-1229-3p	CPT1B	mirtarbase	23622248
hsa-miR-1229-3p	DCTD	mirtarbase	23622248
hsa-miR-1229-3p	GAPDH	mirtarbase	23622248
hsa-miR-1229-3p	GFPT1	mirtarbase	23824327
hsa-miR-1229-3p	GPI	mirtarbase	23622248
hsa-miR-1229-3p	HADHB	mirtarbase	23622248
hsa-miR-1229-3p	KMT2D	mirtarbase	23622248 / 26701625
hsa-miR-1229-3p	NEU3	mirtarbase	23622248
hsa-miR-1229-3p	NME2	mirtarbase	23622248
hsa-miR-1229-3p	PANK2	mirtarbase	19536157
hsa-miR-1229-3p	PHGDH	mirtarbase	23622248
hsa-miR-1229-3p	PTDSS1	mirtarbase	23824327
hsa-miR-1229-3p	SCD	mirtarbase	23622248
hsa-miR-1229-3p	SETD7	mirtarbase	22012620
hsa-miR-1229-3p	UGT2B4	mirtarbase	19536157
hsa-miR-1229-5p	L2HGDH	mirtarbase	20371350 / 21572407
hsa-miR-1229-5p	NNT	mirtarbase	23446348 / 21572407 / 27292025
hsa-miR-1229-5p	NPR1	mirtarbase	23824327
hsa-miR-1229-5p	PHYKPL	mirtarbase	23592263
hsa-miR-1229-5p	TK1	mirtarbase	26701625
hsa-miR-1231	CYP1A1	mirtarbase	22291592
hsa-miR-1231	GMDS	mirtarbase	22012620
hsa-miR-1233-3p	AHCYL2	mirtarbase	21572407 / 26701625
hsa-miR-1233-3p	B4GALT1	mirtarbase	23313552
hsa-miR-1233-3p	CYB5R4	mirtarbase	19536157
hsa-miR-1233-3p	NDUFA7	mirtarbase	20371350
hsa-miR-1233-3p	NDUFB11	mirtarbase	27292025
hsa-miR-1233-3p	PDE11A	mirtarbase	23592263
hsa-miR-1233-3p	PLA2G4D	mirtarbase	22012620 / 26701625
hsa-miR-1233-3p	PSAP	mirtarbase	26701625
hsa-miR-1233-3p	PYCR1	mirtarbase	26701625
hsa-miR-1233-3p	SGPP2	mirtarbase	23592263
hsa-miR-1233-5p	ACADSB	mirtarbase	23592263
hsa-miR-1233-5p	ALDOA	mirtarbase	26701625
hsa-miR-1233-5p	COLGALT1	mirtarbase	23592263
hsa-miR-1233-5p	CYP2W1	mirtarbase	23592263 / 23446348 / 20371350
hsa-miR-1233-5p	KMT2D	mirtarbase	26701625
hsa-miR-1233-5p	PDE7B	mirtarbase	23592263
hsa-miR-1233-5p	PFKFB3	mirtarbase	23592263 / 26701625
hsa-miR-1233-5p	PGAM1	mirtarbase	26701625
hsa-miR-1233-5p	PGAM4	mirtarbase	23592263 / 26701625
hsa-miR-1233-5p	PGM2L1	mirtarbase	23592263
hsa-miR-1233-5p	PISD	mirtarbase	26701625
hsa-miR-1233-5p	PLD3	mirtarbase	26701625
hsa-miR-1233-5p	PNPLA6	mirtarbase	23592263
hsa-miR-1233-5p	SETD1B	mirtarbase	26701625
hsa-miR-1233-5p	SRD5A1	mirtarbase	22012620
hsa-miR-1233-5p	SRD5A3	mirtarbase	26701625
hsa-miR-1234-3p	ACOX1	mirtarbase	19536157
hsa-miR-1234-3p	ALDOA	mirtarbase	27292025
hsa-miR-1234-3p	BHMT2	mirtarbase	23313552
hsa-miR-1234-3p	ENTPD4	mirtarbase	22927820
hsa-miR-1234-3p	FAHD1	mirtarbase	19536157
hsa-miR-1234-3p	GDPD1	mirtarbase	23824327 / 27418678
hsa-miR-1234-3p	GNE	mirtarbase	23824327
hsa-miR-1234-3p	LIPG	mirtarbase	23824327
hsa-miR-1234-3p	MMAB	mirtarbase	23824327
hsa-miR-1234-3p	MRI1	mirtarbase	23313552
hsa-miR-1234-3p	PTGIS	mirtarbase	23313552
hsa-miR-1234-3p	RFK	mirtarbase	23313552
hsa-miR-1234-3p	SHMT1	mirtarbase	20371350
hsa-miR-1234-3p	THEM4	mirtarbase	23313552
hsa-miR-1236-3p	ATP6V0E1	mirtarbase	27292025
hsa-miR-1236-3p	AWAT2	mirtarbase	22012620
hsa-miR-1236-3p	EZH2	mirtarbase	23824327
hsa-miR-1236-3p	HIBADH	mirtarbase	23824327
hsa-miR-1236-3p	NUDT5	mirtarbase	23824327 / 19536157
hsa-miR-1236-3p	PANK3	mirtarbase	23824327
hsa-miR-1236-3p	PIK3C2B	mirtarbase	23824327
hsa-miR-1236-3p	SETD1A	mirtarbase	19536157
hsa-miR-1236-3p	SETD7	mirtarbase	19536157
hsa-miR-1236-3p	THEM4	mirtarbase	23824327
hsa-miR-1236-5p	ATP6V1E1	mirtarbase	27292025
hsa-miR-1236-5p	LYPLA2	mirtarbase	23592263 / 26701625
hsa-miR-1236-5p	RETSAT	mirtarbase	27292025
hsa-miR-1236-5p	SRM	mirtarbase	23446348 / 21572407 / 20371350 / 26701625
hsa-miR-1236-5p	TMEM189-UBE2V1	mirtarbase	20371350
hsa-miR-1237-3p	B4GALT6	mirtarbase	23824327
hsa-miR-1237-3p	MTAP	mirtarbase	22012620
hsa-miR-1237-3p	NUDT5	mirtarbase	19536157
hsa-miR-1237-3p	PDE3A	mirtarbase	23824327
hsa-miR-1237-3p	SORD	mirtarbase	23824327
hsa-miR-1237-5p	ATP6AP1	mirtarbase	23313552
hsa-miR-1237-5p	CERS1	mirtarbase	20371350
hsa-miR-1237-5p	COX10	mirtarbase	23592263
hsa-miR-1237-5p	CS	mirtarbase	23592263
hsa-miR-1237-5p	ENTPD5	mirtarbase	21572407 / 20371350 / 26701625
hsa-miR-1237-5p	G6PC3	mirtarbase	27292025
hsa-miR-1237-5p	SMOX	mirtarbase	26701625
hsa-miR-1238-3p	DHTKD1	mirtarbase	23824327
hsa-miR-1238-3p	MAT2A	mirtarbase	24398324 / 23446348 / 22012620 / 21572407 / 20371350
hsa-miR-1238-3p	RDH10	mirtarbase	23592263
hsa-miR-1238-5p	ALPI	mirtarbase	23313552
hsa-miR-1238-5p	LYPLA2	mirtarbase	23592263 / 26701625
hsa-miR-1238-5p	NSD1	mirtarbase	24398324
hsa-miR-1238-5p	PIP4K2C	mirtarbase	22100165
hsa-miR-1238-5p	PKM	mirtarbase	26701625
hsa-miR-1238-5p	SETD1B	mirtarbase	23592263
hsa-miR-1238-5p	SRD5A3	mirtarbase	26701625
hsa-miR-124-3p	ACAA2	mirecords / mirtarbase	16549876 / 15685193 / 18668037
hsa-miR-124-3p	ACADL	mirtarbase	18668037
hsa-miR-124-3p	ACADVL	mirtarbase	18668037
hsa-miR-124-3p	ACAT2	mirtarbase	18668037
hsa-miR-124-3p	ACSL5	mirtarbase	18668037
hsa-miR-124-3p	ADCY3	mirtarbase	18668037
hsa-miR-124-3p	ADCY6	mirtarbase	18668037
hsa-miR-124-3p	ADCY9	mirtarbase	18668037
hsa-miR-124-3p	AK2	mirecords / mirtarbase	15685193
hsa-miR-124-3p	AK3	mirtarbase	18668037
hsa-miR-124-3p	ALDH18A1	mirtarbase	18668037
hsa-miR-124-3p	ALDH3B2	mirtarbase	18668037
hsa-miR-124-3p	ALDH9A1	mirecords / mirtarbase	15685193 / 18668037
hsa-miR-124-3p	ALDOB	mirtarbase	18668037
hsa-miR-124-3p	ANPEP	mirtarbase	18668037
hsa-miR-124-3p	ATP6V0E1	mirecords / mirtarbase	16549876 / 15685193
hsa-miR-124-3p	B4GALT1	mirecords / mirtarbase	15685193 / 27516205 / 18668037
hsa-miR-124-3p	B4GALT5	mirtarbase	18668037
hsa-miR-124-3p	CA12	mirtarbase	18668037
hsa-miR-124-3p	CA5B	mirtarbase	18668037
hsa-miR-124-3p	CBR3	mirtarbase	18668037
hsa-miR-124-3p	CDO1	mirtarbase	18668037
hsa-miR-124-3p	CEPT1	mirtarbase	18668037
hsa-miR-124-3p	CERS2	mirtarbase	15685193 / 18668037
hsa-miR-124-3p	COLGALT1	mirtarbase	18668037
hsa-miR-124-3p	CPOX	mirtarbase	18668037
hsa-miR-124-3p	CYP1B1	mirecords / mirtarbase	15685193 / 18668037
hsa-miR-124-3p	CYP2U1	mirtarbase	18668037
hsa-miR-124-3p	DBT	mirtarbase	18668037
hsa-miR-124-3p	DCTD	mirecords / mirtarbase	15685193 / 18668037
hsa-miR-124-3p	DGAT2	mirtarbase	20371350
hsa-miR-124-3p	DGKA	mirtarbase	18668037
hsa-miR-124-3p	DHCR24	mirecords / mirtarbase	15685193
hsa-miR-124-3p	DHRS3	mirtarbase	18668037
hsa-miR-124-3p	DNMT3B	mirtarbase	26497367
hsa-miR-124-3p	DPYD	mirtarbase	18668037
hsa-miR-124-3p	ECI2	mirtarbase	15685193 / 18668037
hsa-miR-124-3p	ELOVL1	mirecords / mirtarbase	15685193 / 18668037
hsa-miR-124-3p	ELOVL5	mirtarbase	16549876
hsa-miR-124-3p	ETNPPL	mirtarbase	18668037
hsa-miR-124-3p	EZH2	mirecords / mirtarbase	21672940 / 24658854 / 23404119 / 18668037 / 24878960
hsa-miR-124-3p	FECH	mirtarbase	18668037
hsa-miR-124-3p	FPGS	mirtarbase	18668037
hsa-miR-124-3p	FXN	mirtarbase	23382970
hsa-miR-124-3p	GCH1	mirtarbase	18668037
hsa-miR-124-3p	GDA	mirtarbase	18668037
hsa-miR-124-3p	GFPT2	mirtarbase	18668037
hsa-miR-124-3p	GMPR2	mirtarbase	18668037
hsa-miR-124-3p	GNPDA1	mirtarbase	18668037
hsa-miR-124-3p	GPX4	mirtarbase	23622248
hsa-miR-124-3p	GPX7	mirtarbase	18668037
hsa-miR-124-3p	GSTK1	mirtarbase	18668037
hsa-miR-124-3p	GUK1	mirtarbase	18668037
hsa-miR-124-3p	H6PD	mirtarbase	18668037 / 23592263
hsa-miR-124-3p	HADH	mirecords / mirtarbase	15685193 / 18668037
hsa-miR-124-3p	HADHA	mirtarbase	18668037
hsa-miR-124-3p	HADHB	mirecords / mirtarbase	15685193 / 18668037
hsa-miR-124-3p	HEPHL1	mirtarbase	22012620
hsa-miR-124-3p	HKDC1	mirtarbase	18668037
hsa-miR-124-3p	HMOX1	mirtarbase	18668037
hsa-miR-124-3p	HSD17B10	mirtarbase	18668037
hsa-miR-124-3p	HSD17B2	mirtarbase	18668037
hsa-miR-124-3p	HSD17B6	mirtarbase	18668037
hsa-miR-124-3p	IVD	mirtarbase	18668037
hsa-miR-124-3p	KDSR	mirtarbase	18668037
hsa-miR-124-3p	L3HYPDH	mirtarbase	18668037
hsa-miR-124-3p	LCLAT1	mirtarbase	18668037
hsa-miR-124-3p	LPCAT3	mirtarbase	20371350
hsa-miR-124-3p	LTA4H	mirtarbase	18668037
hsa-miR-124-3p	MTMR6	mirecords / mirtarbase	15685193 / 18668037
hsa-miR-124-3p	NEU4	mirtarbase	18668037
hsa-miR-124-3p	NME4	mirecords / mirtarbase	15685193
hsa-miR-124-3p	NMNAT1	mirtarbase	18668037
hsa-miR-124-3p	NNMT	mirtarbase	18668037
hsa-miR-124-3p	NPR1	mirtarbase	18668037
hsa-miR-124-3p	NT5C1B	mirtarbase	18668037
hsa-miR-124-3p	NT5E	mirtarbase	18668037
hsa-miR-124-3p	P4HA3	mirtarbase	18668037
hsa-miR-124-3p	PANK2	mirtarbase	23592263
hsa-miR-124-3p	PAPSS2	mirecords / mirtarbase	15685193 / 18668037
hsa-miR-124-3p	PCCB	mirtarbase	20371350
hsa-miR-124-3p	PDE3B	mirtarbase	18668037
hsa-miR-124-3p	PEMT	mirtarbase	18668037
hsa-miR-124-3p	PGM1	mirecords / mirtarbase	15685193 / 18668037
hsa-miR-124-3p	PGM2	mirtarbase	18668037
hsa-miR-124-3p	PI4K2B	mirtarbase	18668037 / 23446348 / 21572407 / 20371350
hsa-miR-124-3p	PIK3C2A	mirtarbase	18668037
hsa-miR-124-3p	PIK3CA	mirtarbase	22940133
hsa-miR-124-3p	PLA2G4A	mirtarbase	18668037
hsa-miR-124-3p	PLA2G4C	mirtarbase	18668037
hsa-miR-124-3p	PLA2G7	mirtarbase	18668037
hsa-miR-124-3p	PLOD1	mirtarbase	18668037
hsa-miR-124-3p	PLOD3	mirecords / mirtarbase	15685193 / 18668037
hsa-miR-124-3p	PNP	mirtarbase	18668037
hsa-miR-124-3p	PNPLA2	mirtarbase	18668037 / 26701625
hsa-miR-124-3p	PRPS1	mirtarbase	18668037
hsa-miR-124-3p	PTGES	mirtarbase	18668037
hsa-miR-124-3p	PTGS1	mirtarbase	18668037
hsa-miR-124-3p	PTGS2	mirtarbase	18668037
hsa-miR-124-3p	RDH10	mirecords / mirtarbase	17724173 / 18668037
hsa-miR-124-3p	RPIA	mirtarbase	18668037
hsa-miR-124-3p	SC5D	mirtarbase	18668037
hsa-miR-124-3p	SGMS1	mirtarbase	18668037
hsa-miR-124-3p	SGPL1	mirtarbase	25559917 / 18668037
hsa-miR-124-3p	SHMT2	mirtarbase	18668037
hsa-miR-124-3p	SHPK	mirtarbase	18668037
hsa-miR-124-3p	SIRT1	mirtarbase	27646435 / 20362537
hsa-miR-124-3p	SMOX	mirtarbase	27041578
hsa-miR-124-3p	SMPD4	mirtarbase	18668037
hsa-miR-124-3p	SMYD3	mirtarbase	19843643 / 22819820
hsa-miR-124-3p	SPHK1	mirtarbase	22450659 / 28386327 / 28212569 / 18668037 / 24279510
hsa-miR-124-3p	SUCLG2	mirecords / mirtarbase	16549876
hsa-miR-124-3p	SULT1E1	mirtarbase	18668037
hsa-miR-124-3p	TYRP1	mirtarbase	22012620 / 21572407
hsa-miR-124-3p	UGT1A10	mirtarbase	18668037
hsa-miR-124-3p	UMPS	mirtarbase	18668037
hsa-miR-124-3p	VKORC1	mirtarbase	18668037
hsa-miR-124-3p	VNN2	mirtarbase	18668037
hsa-miR-124-5p	ACHE	mirtarbase	27977009
hsa-miR-124-5p	MAOB	mirtarbase	26701625
hsa-miR-124-5p	MTMR4	mirtarbase	23592263 / 21572407 / 26701625
hsa-miR-124-5p	PSAPL1	mirtarbase	22012620
hsa-miR-124-5p	PSAT1	mirtarbase	22012620 / 20371350
hsa-miR-124-5p	TXNRD1	mirtarbase	23313552
hsa-miR-1243	AMD1	mirtarbase	23446348 / 27292025
hsa-miR-1244	ACER2	mirtarbase	24398324
hsa-miR-1244	AKR1B10	mirtarbase	22291592
hsa-miR-1244	ALDOA	mirtarbase	27292025
hsa-miR-1244	DCK	mirtarbase	23446348 / 20371350
hsa-miR-1244	MCCC2	mirtarbase	27292025
hsa-miR-1244	SAT1	mirtarbase	23446348 / 21572407
hsa-miR-1244	UQCRB	mirtarbase	23446348 / 22012620
hsa-miR-1245a	ADK	mirtarbase	23824327
hsa-miR-1245a	AGMAT	mirtarbase	23824327
hsa-miR-1245a	ALDH2	mirtarbase	23446348
hsa-miR-1245a	MGST3	mirtarbase	23824327
hsa-miR-1245a	MOGAT1	mirtarbase	19536157
hsa-miR-1245a	OCRL	mirtarbase	23313552
hsa-miR-1245a	PAICS	mirtarbase	23824327
hsa-miR-1245a	PGM3	mirtarbase	21572407
hsa-miR-1245a	UGCG	mirtarbase	23592263 / 26701625
hsa-miR-1245b-3p	ACADSB	mirtarbase	19536157
hsa-miR-1245b-3p	ETNK1	mirtarbase	21572407
hsa-miR-1245b-3p	PGAM4	mirtarbase	21572407
hsa-miR-1245b-3p	UQCRH	mirtarbase	23592263
hsa-miR-1245b-5p	GSTO2	mirtarbase	23824327
hsa-miR-1245b-5p	LYPLA2	mirtarbase	26701625 / 27292025
hsa-miR-1245b-5p	NEU3	mirtarbase	22291592
hsa-miR-1245b-5p	PLCB3	mirtarbase	22100165
hsa-miR-1246	ADCY9	mirtarbase	23446348 / 21572407 / 20371350
hsa-miR-1247-3p	ACOX1	mirtarbase	21572407
hsa-miR-1247-3p	ADH5	mirtarbase	23313552 / 26701625 / 27292025
hsa-miR-1247-3p	AKR1D1	mirtarbase	23824327
hsa-miR-1247-3p	ATP6V0E1	mirtarbase	26701625
hsa-miR-1247-3p	ATP6V1B1	mirtarbase	20371350
hsa-miR-1247-3p	BPNT1	mirtarbase	23313552 / 27292025
hsa-miR-1247-3p	BTD	mirtarbase	23592263
hsa-miR-1247-3p	CYP51A1	mirtarbase	23592263
hsa-miR-1247-3p	DHODH	mirtarbase	23592263 / 21572407 / 23313552
hsa-miR-1247-3p	GGCX	mirtarbase	27292025
hsa-miR-1247-3p	GMPPB	mirtarbase	27292025
hsa-miR-1247-3p	HACD2	mirtarbase	23446348
hsa-miR-1247-3p	HSD17B12	mirtarbase	27292025
hsa-miR-1247-3p	L2HGDH	mirtarbase	27292025
hsa-miR-1247-3p	LHPP	mirtarbase	23592263 / 23446348 / 21572407
hsa-miR-1247-3p	LIPC	mirtarbase	23592263
hsa-miR-1247-3p	LPIN3	mirtarbase	27292025
hsa-miR-1247-3p	NDUFV3	mirtarbase	23824327
hsa-miR-1247-3p	NME1-NME2	mirtarbase	23592263
hsa-miR-1247-3p	NME2	mirtarbase	23592263
hsa-miR-1247-3p	NMNAT1	mirtarbase	23592263
hsa-miR-1247-3p	NPR1	mirtarbase	27292025
hsa-miR-1247-3p	PDE4C	mirtarbase	23824327
hsa-miR-1247-3p	PRPS1	mirtarbase	26701625
hsa-miR-1247-3p	PTGES2	mirtarbase	23592263
hsa-miR-1247-3p	PTGR2	mirtarbase	27292025
hsa-miR-1247-3p	RDH13	mirtarbase	23592263 / 26701625 / 27292025
hsa-miR-1247-3p	SCD5	mirtarbase	27292025
hsa-miR-1247-3p	SGPP2	mirtarbase	23592263
hsa-miR-1247-3p	SIRT3	mirtarbase	27292025
hsa-miR-1247-3p	SPTLC3	mirtarbase	27292025
hsa-miR-1247-3p	TIGAR	mirtarbase	27292025
hsa-miR-1247-3p	UQCR11	mirtarbase	23592263
hsa-miR-1247-5p	CYP2B6	mirtarbase	23824327
hsa-miR-1248	B4GALT6	mirtarbase	23824327
hsa-miR-1248	LIPC	mirtarbase	23824327
hsa-miR-1248	MTAP	mirtarbase	22012620
hsa-miR-1248	NUDT5	mirtarbase	19536157
hsa-miR-1248	PDE1B	mirtarbase	19536157
hsa-miR-1248	SORD	mirtarbase	23824327
hsa-miR-1248	UGT2B28	mirtarbase	23824327
hsa-miR-1249-3p	PLCG2	mirtarbase	24398324 / 23446348 / 22012620 / 20371350 / 24906430 / 26701625 / 27292025 / 27418678
hsa-miR-1249-5p	ADCY5	mirtarbase	28735896
hsa-miR-1249-5p	ATIC	mirtarbase	23824327
hsa-miR-1249-5p	ATP6V1F	mirtarbase	23592263 / 24398324 / 26701625 / 27292025
hsa-miR-1249-5p	DCXR	mirtarbase	26701625
hsa-miR-1249-5p	DOT1L	mirtarbase	26701625
hsa-miR-1249-5p	GCDH	mirtarbase	23592263
hsa-miR-1249-5p	MAT1A	mirtarbase	23592263 / 26701625
hsa-miR-1249-5p	PDE4A	mirtarbase	23592263 / 20371350
hsa-miR-1249-5p	PKM	mirtarbase	23592263 / 26701625
hsa-miR-1249-5p	PLCG2	mirtarbase	24398324 / 23446348
hsa-miR-1249-5p	PNPLA2	mirtarbase	26701625
hsa-miR-1249-5p	PNPLA6	mirtarbase	23592263
hsa-miR-1249-5p	PTGS1	mirtarbase	19536157
hsa-miR-1249-5p	SCD	mirtarbase	23592263
hsa-miR-1249-5p	TK1	mirtarbase	26701625
hsa-miR-1249-5p	TMEM189-UBE2V1	mirtarbase	23592263 / 21572407
hsa-miR-1250-3p	ACACA	mirtarbase	23313552
hsa-miR-1250-3p	ACER3	mirtarbase	27418678
hsa-miR-1250-3p	ACSS3	mirtarbase	22012620
hsa-miR-1250-3p	ALDH9A1	mirtarbase	23592263
hsa-miR-1250-3p	ATP6V0E2	mirtarbase	22012620
hsa-miR-1250-3p	CBR1	mirtarbase	22012620
hsa-miR-1250-3p	CPT1A	mirtarbase	23824327
hsa-miR-1250-3p	CYB5R4	mirtarbase	19536157
hsa-miR-1250-3p	DDO	mirtarbase	23824327
hsa-miR-1250-3p	ENO4	mirtarbase	23824327 / 27418678
hsa-miR-1250-3p	GLO1	mirtarbase	20371350
hsa-miR-1250-3p	IDH2	mirtarbase	19536157
hsa-miR-1250-3p	KMT2A	mirtarbase	23824327
hsa-miR-1250-3p	LIPA	mirtarbase	27292025
hsa-miR-1250-3p	NUDT5	mirtarbase	22012620
hsa-miR-1250-3p	PAFAH1B1	mirtarbase	23446348
hsa-miR-1250-3p	PFKM	mirtarbase	23824327
hsa-miR-1250-3p	PTEN	mirtarbase	26544868
hsa-miR-1250-3p	SDHD	mirtarbase	23592263
hsa-miR-1250-3p	UQCRFS1	mirtarbase	27418678
hsa-miR-1251-3p	DMGDH	mirtarbase	19536157
hsa-miR-1251-3p	MDH2	mirtarbase	27292025
hsa-miR-1251-3p	OCRL	mirtarbase	23313552
hsa-miR-1251-3p	SCD	mirtarbase	26701625
hsa-miR-1251-5p	ALDOA	mirtarbase	19536157
hsa-miR-1251-5p	L2HGDH	mirtarbase	23824327
hsa-miR-1252-3p	ECHDC1	mirtarbase	21572407
hsa-miR-1252-3p	FXN	mirtarbase	23592263
hsa-miR-1252-3p	KMT2D	mirtarbase	24398324 / 21572407
hsa-miR-1252-3p	NDUFS1	mirtarbase	23592263
hsa-miR-1252-3p	PNPO	mirtarbase	21572407
hsa-miR-1252-3p	UGCG	mirtarbase	23592263
hsa-miR-1252-5p	ALDH9A1	mirtarbase	26701625
hsa-miR-1252-5p	FTH1	mirtarbase	23446348
hsa-miR-1252-5p	HAAO	mirtarbase	23592263
hsa-miR-1252-5p	HCCS	mirtarbase	27292025
hsa-miR-1252-5p	LDHA	mirtarbase	23446348
hsa-miR-1252-5p	LYPLA2	mirtarbase	26701625 / 27292025
hsa-miR-1252-5p	MARS2	mirtarbase	20371350
hsa-miR-1252-5p	PDXK	mirtarbase	26701625
hsa-miR-1252-5p	UCK2	mirtarbase	23592263 / 26701625
hsa-miR-1253	CEPT1	mirtarbase	22100165
hsa-miR-1253	CERS2	mirtarbase	26701625
hsa-miR-1253	G6PC	mirtarbase	22012620
hsa-miR-1253	MGLL	mirtarbase	23824327
hsa-miR-1253	NDUFB11	mirtarbase	27292025
hsa-miR-1253	PLA2G2D	mirtarbase	23592263
hsa-miR-1253	PYCR1	mirtarbase	26701625
hsa-miR-1253	SETD1B	mirtarbase	26701625
hsa-miR-1253	SMYD2	mirtarbase	22100165
hsa-miR-1253	TMEM189-UBE2V1	mirtarbase	23592263
hsa-miR-1254	ACAD8	mirtarbase	23824327
hsa-miR-1254	ALDH6A1	mirtarbase	27292025
hsa-miR-1254	EHHADH	mirtarbase	19536157
hsa-miR-1254	NDUFV3	mirtarbase	23446348
hsa-miR-1254	NPR1	mirtarbase	23446348
hsa-miR-1254	NT5C2	mirtarbase	23446348
hsa-miR-1254	PANK2	mirtarbase	23592263 / 20371350
hsa-miR-1254	PDE4C	mirtarbase	23824327
hsa-miR-1254	PKM	mirtarbase	23592263
hsa-miR-1254	SCD	mirtarbase	23313552
hsa-miR-1255a	ALDH3B1	mirtarbase	23592263
hsa-miR-1255a	CPS1	mirtarbase	23592263
hsa-miR-1255a	DCXR	mirtarbase	26701625
hsa-miR-1255a	GPX7	mirtarbase	23592263
hsa-miR-1255a	NMNAT2	mirtarbase	27418678
hsa-miR-1255a	PISD	mirtarbase	26701625
hsa-miR-1255a	SRD5A3	mirtarbase	26701625
hsa-miR-1255a	TPI1	mirtarbase	26701625
hsa-miR-1255b-2-3p	ACACA	mirtarbase	23313552
hsa-miR-1255b-2-3p	ALDH9A1	mirtarbase	23592263 / 23446348 / 21572407 / 20371350 / 27418678
hsa-miR-1255b-2-3p	NDUFS5	mirtarbase	23313552
hsa-miR-1255b-2-3p	PI4K2B	mirtarbase	23824327
hsa-miR-1255b-5p	ALDH3B1	mirtarbase	23592263
hsa-miR-1255b-5p	CPS1	mirtarbase	23592263
hsa-miR-1255b-5p	DCXR	mirtarbase	26701625
hsa-miR-1255b-5p	GPX7	mirtarbase	23592263
hsa-miR-1255b-5p	NMNAT2	mirtarbase	27418678
hsa-miR-1255b-5p	PISD	mirtarbase	26701625
hsa-miR-1255b-5p	SRD5A3	mirtarbase	26701625
hsa-miR-1255b-5p	TPI1	mirtarbase	26701625
hsa-miR-1257	CERS2	mirtarbase	23592263
hsa-miR-1257	GLUD2	mirtarbase	19536157
hsa-miR-1257	IPMK	mirtarbase	21572407
hsa-miR-1257	NDUFA12	mirtarbase	20371350
hsa-miR-1257	PCCB	mirtarbase	23592263
hsa-miR-1257	PISD	mirtarbase	26701625
hsa-miR-1257	TXNRD1	mirtarbase	23592263
hsa-miR-1257	VKORC1L1	mirtarbase	22012620
hsa-miR-125a-3p	ADO	mirtarbase	23824327
hsa-miR-125a-3p	AK2	mirtarbase	23592263
hsa-miR-125a-3p	ALDOA	mirtarbase	23824327
hsa-miR-125a-3p	ATP6V1B2	mirtarbase	23622248
hsa-miR-125a-3p	B4GALT1	mirtarbase	23313552
hsa-miR-125a-3p	COLGALT1	mirtarbase	23592263
hsa-miR-125a-3p	DEGS1	mirtarbase	23824327
hsa-miR-125a-3p	DHTKD1	mirtarbase	23824327 / 26701625
hsa-miR-125a-3p	EZH2	mirtarbase	28052011
hsa-miR-125a-3p	FXN	mirtarbase	23824327
hsa-miR-125a-3p	GBA2	mirtarbase	23592263
hsa-miR-125a-3p	GLUL	mirtarbase	23622248
hsa-miR-125a-3p	GNE	mirtarbase	23824327
hsa-miR-125a-3p	IVD	mirtarbase	23824327
hsa-miR-125a-3p	LIAS	mirtarbase	23824327 / 22927820
hsa-miR-125a-3p	LIPG	mirtarbase	23824327
hsa-miR-125a-3p	MMAB	mirtarbase	23824327
hsa-miR-125a-3p	MTAP	mirtarbase	23592263
hsa-miR-125a-3p	MTHFR	mirtarbase	23592263
hsa-miR-125a-3p	NT5C2	mirtarbase	22927820
hsa-miR-125a-3p	PDE4C	mirtarbase	19536157
hsa-miR-125a-3p	PDE6A	mirtarbase	23824327
hsa-miR-125a-3p	PDE7A	mirtarbase	23824327
hsa-miR-125a-3p	PFAS	mirtarbase	23622248
hsa-miR-125a-3p	PFKFB2	mirtarbase	23592263
hsa-miR-125a-3p	PGK1	mirtarbase	23824327
hsa-miR-125a-3p	PIK3C2A	mirtarbase	23824327
hsa-miR-125a-3p	PISD	mirtarbase	23592263 / 24398324 / 23446348 / 21572407 / 20371350 / 26701625
hsa-miR-125a-5p	B4GALT1	mirtarbase	22815788
hsa-miR-125a-5p	DLST	mirtarbase	23622248
hsa-miR-125a-5p	ENO1	mirtarbase	23622248
hsa-miR-125a-5p	ETNK2	mirtarbase	22815788
hsa-miR-125a-5p	GGCT	mirtarbase	23622248
hsa-miR-125a-5p	GSS	mirtarbase	22012620
hsa-miR-125a-5p	HK2	mirtarbase	22593586
hsa-miR-125a-5p	HMGCLL1	mirtarbase	19536157
hsa-miR-125a-5p	IPPK	mirtarbase	19536157
hsa-miR-125a-5p	LYPLA1	mirtarbase	23622248
hsa-miR-125a-5p	MAT2A	mirtarbase	23622248
hsa-miR-125a-5p	NDUFB6	mirtarbase	20371350
hsa-miR-125a-5p	NME2	mirtarbase	23622248
hsa-miR-125a-5p	NNT	mirtarbase	23622248
hsa-miR-125a-5p	PANK1	mirtarbase	23824327
hsa-miR-125a-5p	PC	mirtarbase	23622248
hsa-miR-125a-5p	PFKM	mirtarbase	23824327
hsa-miR-125a-5p	PGM3	mirtarbase	23622248
hsa-miR-125a-5p	PIK3CG	mirtarbase	26622553
hsa-miR-125a-5p	PLA2G4F	mirtarbase	23622248
hsa-miR-125a-5p	PTGS1	mirtarbase	19536157
hsa-miR-125a-5p	SGPL1	mirtarbase	23592263
hsa-miR-125a-5p	SIRT7	mirtarbase	23079745
hsa-miR-125a-5p	TAZ	mirtarbase	27094723
hsa-miR-125a-5p	TPI1	mirtarbase	23622248
hsa-miR-125b-1-3p	SGMS1	mirtarbase	26701625
hsa-miR-125b-1-3p	SGPL1	mirtarbase	27935985
hsa-miR-125b-2-3p	ACSBG1	mirtarbase	19536157
hsa-miR-125b-2-3p	DGKH	mirtarbase	19536157
hsa-miR-125b-2-3p	LRTOMT	mirtarbase	23313552
hsa-miR-125b-2-3p	MTFMT	mirtarbase	23313552
hsa-miR-125b-2-3p	NDUFS7	mirtarbase	23622248
hsa-miR-125b-2-3p	NSD1	mirtarbase	23313552
hsa-miR-125b-5p	ACLY	mirtarbase	23622248
hsa-miR-125b-5p	ACSS1	mirtarbase	23622248
hsa-miR-125b-5p	ALOX5	mirtarbase	25589070
hsa-miR-125b-5p	COX7C	mirtarbase	23622248
hsa-miR-125b-5p	CYP1A1	mirecords	18056640
hsa-miR-125b-5p	CYP24A1	mirtarbase	19570947
hsa-miR-125b-5p	DGAT1	mirtarbase	19635812
hsa-miR-125b-5p	EHMT1	mirtarbase	23622248
hsa-miR-125b-5p	FBXO38	mirtarbase	23622248
hsa-miR-125b-5p	GSS	mirtarbase	22723551 / 22012620
hsa-miR-125b-5p	HK2	mirtarbase	22593586
hsa-miR-125b-5p	HMGCLL1	mirtarbase	19536157
hsa-miR-125b-5p	IPPK	mirtarbase	19536157
hsa-miR-125b-5p	KMT2D	mirtarbase	23622248
hsa-miR-125b-5p	LIPA	mirtarbase	22723551
hsa-miR-125b-5p	LSS	mirtarbase	23622248
hsa-miR-125b-5p	LTA4H	mirtarbase	23622248
hsa-miR-125b-5p	LYPLA2	mirtarbase	17891175
hsa-miR-125b-5p	MMAB	mirtarbase	23622248
hsa-miR-125b-5p	MTMR3	mirtarbase	23622248
hsa-miR-125b-5p	MTMR4	mirtarbase	23622248
hsa-miR-125b-5p	NEU1	mirtarbase	27220320
hsa-miR-125b-5p	NME2	mirtarbase	23622248
hsa-miR-125b-5p	NNT	mirtarbase	23622248
hsa-miR-125b-5p	PANK1	mirtarbase	23824327
hsa-miR-125b-5p	PFKM	mirtarbase	23824327
hsa-miR-125b-5p	PIK3CB	mirtarbase	26458815
hsa-miR-125b-5p	PIK3CD	mirtarbase	23160634 / 24517182
hsa-miR-125b-5p	PIP4K2C	mirtarbase	23622248
hsa-miR-125b-5p	PKM	mirtarbase	23622248
hsa-miR-125b-5p	PLA2G4F	mirtarbase	23622248
hsa-miR-125b-5p	PPAT	mirtarbase	17891175
hsa-miR-125b-5p	PSAT1	mirtarbase	23622248
hsa-miR-125b-5p	PTGES	mirtarbase	23622248
hsa-miR-125b-5p	PTGS1	mirtarbase	19536157
hsa-miR-125b-5p	SDHB	mirtarbase	23622248
hsa-miR-125b-5p	SGPL1	mirecords / mirtarbase	18056640 / 19635812 / 23592263
hsa-miR-125b-5p	SHMT1	mirtarbase	23622248
hsa-miR-125b-5p	SIRT7	mirtarbase	23079745 / 26770454
hsa-miR-125b-5p	SPHK1	mirtarbase	26807182
hsa-miR-125b-5p	SUV39H1	mirtarbase	27304919
hsa-miR-125b-5p	UGT2B15	mirecords	18056640
hsa-miR-125b-5p	UGT2B17	mirecords	18056640
hsa-miR-125b-5p	UGT2B28	mirecords	18056640
hsa-miR-126-3p	DNMT1	mirtarbase	21538319
hsa-miR-126-3p	EZH2	mirtarbase	27622325
hsa-miR-126-3p	L2HGDH	mirtarbase	27292025
hsa-miR-126-3p	PIK3CG	mirtarbase	22900072 / 23142521 / 27729613 / 26659078
hsa-miR-126-3p	SIRT1	mirtarbase	23877372
hsa-miR-126-5p	AOC3	mirtarbase	20371350
hsa-miR-126-5p	COASY	mirtarbase	23592263
hsa-miR-126-5p	GATM	mirtarbase	26701625
hsa-miR-126-5p	GLUD1	mirtarbase	19536157
hsa-miR-126-5p	L2HGDH	mirtarbase	23446348 / 21572407 / 23313552
hsa-miR-126-5p	PGM3	mirtarbase	21572407
hsa-miR-126-5p	PSAT1	mirtarbase	23446348 / 20371350
hsa-miR-126-5p	UGT8	mirtarbase	23824327 / 23313552 / 27418678
hsa-miR-1260a	ADK	mirtarbase	23824327
hsa-miR-1260a	AMDHD2	mirtarbase	22012620
hsa-miR-1260a	DHCR24	mirtarbase	19536157
hsa-miR-1260a	EZH2	mirtarbase	23824327
hsa-miR-1260a	GNPNAT1	mirtarbase	23592263
hsa-miR-1260a	L2HGDH	mirtarbase	23592263
hsa-miR-1260a	LCLAT1	mirtarbase	21572407 / 20371350
hsa-miR-1260a	MGST3	mirtarbase	23824327
hsa-miR-1260a	NNT	mirtarbase	23824327
hsa-miR-1260a	NUDT9	mirtarbase	27292025
hsa-miR-1260a	PI4K2B	mirtarbase	23824327
hsa-miR-1260a	PSAT1	mirtarbase	23592263 / 23446348 / 20371350
hsa-miR-1260a	SCD	mirtarbase	20371350
hsa-miR-1260b	ACAT1	mirtarbase	23622248
hsa-miR-1260b	ADK	mirtarbase	23824327
hsa-miR-1260b	ALDOA	mirtarbase	23622248
hsa-miR-1260b	AMDHD2	mirtarbase	22012620
hsa-miR-1260b	CKB	mirtarbase	23622248
hsa-miR-1260b	CTPS1	mirtarbase	23622248
hsa-miR-1260b	DHCR24	mirtarbase	19536157
hsa-miR-1260b	DHCR7	mirtarbase	23622248
hsa-miR-1260b	DNMT1	mirtarbase	23622248
hsa-miR-1260b	ENO1	mirtarbase	23622248
hsa-miR-1260b	EZH2	mirtarbase	23824327
hsa-miR-1260b	GNPNAT1	mirtarbase	23592263
hsa-miR-1260b	IDH2	mirtarbase	23622248
hsa-miR-1260b	L2HGDH	mirtarbase	23592263
hsa-miR-1260b	LCLAT1	mirtarbase	21572407 / 20371350
hsa-miR-1260b	MGST3	mirtarbase	23824327
hsa-miR-1260b	NNT	mirtarbase	23824327
hsa-miR-1260b	NUDT9	mirtarbase	27292025
hsa-miR-1260b	PDHB	mirtarbase	23622248
hsa-miR-1260b	PI4K2B	mirtarbase	23824327
hsa-miR-1260b	PKM	mirtarbase	23622248
hsa-miR-1260b	PLOD2	mirtarbase	23622248
hsa-miR-1260b	PSAT1	mirtarbase	23622248 / 23592263 / 23446348 / 20371350
hsa-miR-1260b	RPE	mirtarbase	23622248
hsa-miR-1260b	SCD	mirtarbase	20371350
hsa-miR-1260b	SCP2	mirtarbase	23622248
hsa-miR-1260b	SETDB1	mirtarbase	23622248
hsa-miR-1260b	UGT8	mirtarbase	23622248
hsa-miR-1261	LDHD	mirtarbase	22012620
hsa-miR-1261	NAGK	mirtarbase	23446348 / 21572407 / 20371350
hsa-miR-1261	RDH10	mirtarbase	23592263
hsa-miR-1262	AGMAT	mirtarbase	23313552
hsa-miR-1262	ALDOA	mirtarbase	27292025
hsa-miR-1262	AMD1	mirtarbase	26701625
hsa-miR-1262	ATP6V1C1	mirtarbase	22012620 / 21572407
hsa-miR-1262	CA6	mirtarbase	23706177
hsa-miR-1262	CERS2	mirtarbase	23446348 / 20371350
hsa-miR-1262	CYP11A1	mirtarbase	23592263
hsa-miR-1262	NDUFB5	mirtarbase	23824327
hsa-miR-1262	SETD1B	mirtarbase	23592263
hsa-miR-1262	SGMS2	mirtarbase	23446348 / 20371350
hsa-miR-1262	ZADH2	mirtarbase	24398324 / 23446348 / 21572407 / 20371350
hsa-miR-1264	DNMT1	mirtarbase	26047583
hsa-miR-1264	FASN	mirtarbase	23824327
hsa-miR-1264	GATM	mirtarbase	23824327
hsa-miR-1264	GLO1	mirtarbase	20371350
hsa-miR-1264	LRAT	mirtarbase	23824327
hsa-miR-1264	NDUFS3	mirtarbase	23313552
hsa-miR-1264	PDE1A	mirtarbase	23824327
hsa-miR-1264	SEPSECS	mirtarbase	23824327
hsa-miR-1264	STS	mirtarbase	23592263
hsa-miR-1264	VKORC1L1	mirtarbase	22100165
hsa-miR-1265	ADH4	mirtarbase	21572407
hsa-miR-1265	B4GALT5	mirtarbase	23592263 / 26701625
hsa-miR-1265	DCXR	mirtarbase	26701625
hsa-miR-1265	GUK1	mirtarbase	26701625
hsa-miR-1265	PDE3A	mirtarbase	23313552
hsa-miR-1266-3p	NDUFC2-KCTD14	mirtarbase	23592263
hsa-miR-1266-3p	SRD5A1	mirtarbase	23824327
hsa-miR-1266-3p	TPI1	mirtarbase	23824327
hsa-miR-1266-5p	GBA2	mirtarbase	23592263 / 26701625
hsa-miR-1266-5p	HDDC2	mirtarbase	21572407 / 20371350
hsa-miR-1266-5p	NNT	mirtarbase	23824327
hsa-miR-1266-5p	PDE4C	mirtarbase	19536157
hsa-miR-1266-5p	PSAPL1	mirtarbase	22012620
hsa-miR-1266-5p	PTDSS2	mirtarbase	23824327
hsa-miR-1267	ATP6V0E1	mirtarbase	26701625 / 27292025
hsa-miR-1267	BTD	mirtarbase	19536157
hsa-miR-1267	CERS4	mirtarbase	27418678
hsa-miR-1267	COQ7	mirtarbase	27292025
hsa-miR-1267	DGKE	mirtarbase	23824327
hsa-miR-1267	HSD17B12	mirtarbase	23824327
hsa-miR-1267	MOGAT3	mirtarbase	27292025
hsa-miR-1267	MRI1	mirtarbase	23824327
hsa-miR-1267	MTAP	mirtarbase	23824327
hsa-miR-1267	PDE3A	mirtarbase	27418678 / 28735896
hsa-miR-1267	PIP4K2A	mirtarbase	23592263
hsa-miR-1267	VKORC1L1	mirtarbase	22012620
hsa-miR-1268a	CERS1	mirtarbase	20371350
hsa-miR-1268a	DHCR7	mirtarbase	21572407
hsa-miR-1268a	FASN	mirtarbase	23622248
hsa-miR-1268a	GMPS	mirtarbase	23824327
hsa-miR-1268a	PDE6B	mirtarbase	23824327
hsa-miR-1268a	RETSAT	mirtarbase	19536157
hsa-miR-1268a	SGPL1	mirtarbase	23446348 / 20371350
hsa-miR-1268b	CERS1	mirtarbase	20371350
hsa-miR-1268b	DHCR7	mirtarbase	21572407
hsa-miR-1268b	GMPS	mirtarbase	23824327
hsa-miR-1268b	PDE6B	mirtarbase	23824327
hsa-miR-1268b	RETSAT	mirtarbase	19536157
hsa-miR-1268b	SGPL1	mirtarbase	23446348 / 20371350
hsa-miR-1269a	ACACA	mirtarbase	23313552
hsa-miR-1269a	H6PD	mirtarbase	23592263
hsa-miR-1269a	SCD	mirtarbase	23592263 / 26701625
hsa-miR-1269b	ACACA	mirtarbase	23313552
hsa-miR-1269b	H6PD	mirtarbase	23592263
hsa-miR-1269b	SCD	mirtarbase	23592263 / 26701625
hsa-miR-127-3p	PIK3CG	mirtarbase	25347932
hsa-miR-127-5p	BLVRB	mirtarbase	26708147
hsa-miR-127-5p	DGKD	mirtarbase	24374217
hsa-miR-127-5p	DGKI	mirtarbase	19536157
hsa-miR-127-5p	RRM2	mirtarbase	23592263
hsa-miR-127-5p	SETD1B	mirtarbase	23592263
hsa-miR-127-5p	SRD5A3	mirtarbase	23313552 / 27418678
hsa-miR-127-5p	SYNJ2	mirtarbase	24374217
hsa-miR-1270	AFMID	mirtarbase	26701625
hsa-miR-1270	AHCYL2	mirtarbase	23592263
hsa-miR-1270	CNDP1	mirtarbase	27418678
hsa-miR-1270	CYP2C19	mirtarbase	23592263
hsa-miR-1270	FXN	mirtarbase	23382970
hsa-miR-1270	HAL	mirtarbase	22100165
hsa-miR-1270	PNPO	mirtarbase	23313552
hsa-miR-1270	UMPS	mirtarbase	23824327
hsa-miR-1271-3p	B4GALT1	mirtarbase	23313552
hsa-miR-1271-3p	BPNT1	mirtarbase	23313552
hsa-miR-1271-3p	CBS	mirtarbase	23824327
hsa-miR-1271-3p	DHODH	mirtarbase	23313552
hsa-miR-1271-3p	EHHADH	mirtarbase	19536157
hsa-miR-1271-3p	NPR1	mirtarbase	23446348
hsa-miR-1271-3p	NT5C1B	mirtarbase	23592263
hsa-miR-1271-3p	NT5C1B-RDH14	mirtarbase	23592263
hsa-miR-1271-3p	NT5C2	mirtarbase	23446348 / 23313552
hsa-miR-1271-3p	PCCB	mirtarbase	23824327
hsa-miR-1271-3p	PSAPL1	mirtarbase	22012620
hsa-miR-1271-5p	ABHD14A-ACY1	mirtarbase	23313552
hsa-miR-1271-5p	ACER2	mirtarbase	24398324
hsa-miR-1271-5p	ACY1	mirtarbase	23313552
hsa-miR-1271-5p	ASH1L	mirtarbase	23824327
hsa-miR-1271-5p	PFKFB3	mirtarbase	28735896
hsa-miR-1272	AASDHPPT	mirtarbase	20371350
hsa-miR-1272	CPT1A	mirtarbase	23313552
hsa-miR-1272	GLO1	mirtarbase	23446348 / 20371350
hsa-miR-1272	GPX8	mirtarbase	24398324
hsa-miR-1272	H6PD	mirtarbase	23592263
hsa-miR-1272	PLA2G2C	mirtarbase	23446348
hsa-miR-1272	TMEM189-UBE2V1	mirtarbase	23592263 / 19536157
hsa-miR-1272	UQCRH	mirtarbase	23592263
hsa-miR-1273a	ALDH1B1	mirtarbase	23313552
hsa-miR-1273a	HSD17B12	mirtarbase	23824327 / 23313552
hsa-miR-1273a	MTHFD1	mirtarbase	27292025
hsa-miR-1273a	NME1-NME2	mirtarbase	27292025
hsa-miR-1273a	PAICS	mirtarbase	21572407
hsa-miR-1273a	PCBD2	mirtarbase	27292025
hsa-miR-1273c	NME1-NME2	mirtarbase	27292025
hsa-miR-1273c	PCBD2	mirtarbase	27292025
hsa-miR-1273d	GSR	mirtarbase	27292025
hsa-miR-1273d	PTGIS	mirtarbase	23824327
hsa-miR-1273e	ACOX1	mirtarbase	21572407
hsa-miR-1273e	ACSBG1	mirtarbase	23592263
hsa-miR-1273e	AGPAT5	mirtarbase	22100165
hsa-miR-1273e	AHCYL2	mirtarbase	21572407
hsa-miR-1273e	ALOX15	mirtarbase	23592263
hsa-miR-1273e	AMD1	mirtarbase	23313552
hsa-miR-1273e	ATP6V0D2	mirtarbase	23313552
hsa-miR-1273e	ATP6V0E1	mirtarbase	26701625
hsa-miR-1273e	BTD	mirtarbase	23592263
hsa-miR-1273e	CBS	mirtarbase	23446348 / 26701625 / 27292025
hsa-miR-1273e	CYP51A1	mirtarbase	23592263
hsa-miR-1273e	CYP7B1	mirtarbase	20371350
hsa-miR-1273e	DHODH	mirtarbase	23592263 / 21572407 / 23313552
hsa-miR-1273e	FADS1	mirtarbase	23592263 / 23446348 / 21572407 / 20371350 / 26701625
hsa-miR-1273e	GGCX	mirtarbase	27292025
hsa-miR-1273e	GSR	mirtarbase	23592263
hsa-miR-1273e	HSD3B7	mirtarbase	23592263
hsa-miR-1273e	LIPC	mirtarbase	22100165 / 23592263
hsa-miR-1273e	LIPG	mirtarbase	27292025
hsa-miR-1273e	MRI1	mirtarbase	21572407 / 23313552
hsa-miR-1273e	MSMO1	mirtarbase	27292025
hsa-miR-1273e	MTFMT	mirtarbase	23592263 / 23446348 / 21572407 / 20371350
hsa-miR-1273e	MTHFD1	mirtarbase	23313552 / 27292025
hsa-miR-1273e	NDUFA7	mirtarbase	20371350
hsa-miR-1273e	PAFAH1B2	mirtarbase	23446348 / 21572407
hsa-miR-1273e	PANK2	mirtarbase	23592263 / 20371350
hsa-miR-1273e	PCCA	mirtarbase	22100165
hsa-miR-1273e	PCCB	mirtarbase	26701625
hsa-miR-1273e	PDE11A	mirtarbase	23592263
hsa-miR-1273e	PFAS	mirtarbase	23592263
hsa-miR-1273e	RIMKLB	mirtarbase	22100165
hsa-miR-1273e	RRM1	mirtarbase	23592263
hsa-miR-1273e	RRM2	mirtarbase	23592263 / 21572407
hsa-miR-1273e	SEPHS1	mirtarbase	22100165
hsa-miR-1273e	SGPP2	mirtarbase	23592263
hsa-miR-1273e	SHMT1	mirtarbase	27292025
hsa-miR-1273e	SMS	mirtarbase	27292025
hsa-miR-1273e	TAT	mirtarbase	27292025
hsa-miR-1273e	TIGAR	mirtarbase	20371350
hsa-miR-1273e	UMPS	mirtarbase	23313552
hsa-miR-1273e	UQCRB	mirtarbase	22100165
hsa-miR-1273f	ATP6AP1	mirtarbase	23313552
hsa-miR-1273f	ATP6V0E1	mirtarbase	27292025
hsa-miR-1273f	ATP6V1F	mirtarbase	23592263 / 24398324 / 26701625 / 27292025
hsa-miR-1273f	B4GALT5	mirtarbase	23592263 / 26701625
hsa-miR-1273f	CERS4	mirtarbase	23824327 / 27418678
hsa-miR-1273f	CMPK1	mirtarbase	23446348
hsa-miR-1273f	COX6B1	mirtarbase	27418678
hsa-miR-1273f	CYCS	mirtarbase	23824327
hsa-miR-1273f	DEGS1	mirtarbase	23446348
hsa-miR-1273f	ENO4	mirtarbase	23446348
hsa-miR-1273f	GDPD1	mirtarbase	23446348
hsa-miR-1273f	GGCX	mirtarbase	27292025
hsa-miR-1273f	GLUL	mirtarbase	19536157
hsa-miR-1273f	GSTK1	mirtarbase	23446348
hsa-miR-1273f	HSD11B1L	mirtarbase	23592263
hsa-miR-1273f	LRAT	mirtarbase	23824327 / 22927820 / 27418678
hsa-miR-1273f	LRTOMT	mirtarbase	23313552
hsa-miR-1273f	NANP	mirtarbase	26701625
hsa-miR-1273f	NDUFV3	mirtarbase	23446348
hsa-miR-1273f	NOS1	mirtarbase	27418678
hsa-miR-1273f	NPR1	mirtarbase	23824327
hsa-miR-1273f	PCYT1A	mirtarbase	21572407
hsa-miR-1273f	PGLS	mirtarbase	22100165
hsa-miR-1273f	PGM2L1	mirtarbase	19536157
hsa-miR-1273f	PLCD3	mirtarbase	26701625
hsa-miR-1273f	PNPO	mirtarbase	19536157
hsa-miR-1273f	PTGR2	mirtarbase	23446348
hsa-miR-1273f	RFK	mirtarbase	21572407
hsa-miR-1273f	SGPL1	mirtarbase	23592263
hsa-miR-1273f	SRM	mirtarbase	23446348 / 21572407 / 20371350 / 26701625
hsa-miR-1273g-3p	ACACB	mirtarbase	23824327
hsa-miR-1273g-3p	ALDH1B1	mirtarbase	23313552
hsa-miR-1273g-3p	ALDH5A1	mirtarbase	19536157
hsa-miR-1273g-3p	ALDH9A1	mirtarbase	23446348 / 21572407 / 20371350 / 27418678
hsa-miR-1273g-3p	ALDOA	mirtarbase	27292025
hsa-miR-1273g-3p	ATP6V0E1	mirtarbase	26701625
hsa-miR-1273g-3p	CA5B	mirtarbase	23706177
hsa-miR-1273g-3p	CA6	mirtarbase	27292025
hsa-miR-1273g-3p	CAD	mirtarbase	27292025
hsa-miR-1273g-3p	COX6B1	mirtarbase	27418678
hsa-miR-1273g-3p	CYP1A2	mirtarbase	23824327
hsa-miR-1273g-3p	CYP1B1	mirtarbase	19536157
hsa-miR-1273g-3p	CYP4F3	mirtarbase	27292025
hsa-miR-1273g-3p	ELOVL6	mirtarbase	23824327 / 23313552
hsa-miR-1273g-3p	ENPP1	mirtarbase	26701625
hsa-miR-1273g-3p	ENTPD1	mirtarbase	23824327
hsa-miR-1273g-3p	FAHD1	mirtarbase	23313552
hsa-miR-1273g-3p	GMPR	mirtarbase	24906430
hsa-miR-1273g-3p	HEPHL1	mirtarbase	22012620
hsa-miR-1273g-3p	HSD17B12	mirtarbase	23824327 / 23313552
hsa-miR-1273g-3p	LHPP	mirtarbase	27292025
hsa-miR-1273g-3p	LPIN3	mirtarbase	27292025
hsa-miR-1273g-3p	LRTOMT	mirtarbase	23824327 / 23706177
hsa-miR-1273g-3p	ME2	mirtarbase	27292025
hsa-miR-1273g-3p	MOGAT1	mirtarbase	22012620
hsa-miR-1273g-3p	MRI1	mirtarbase	23313552
hsa-miR-1273g-3p	MTHFD1	mirtarbase	27292025
hsa-miR-1273g-3p	MTHFD1L	mirtarbase	19536157
hsa-miR-1273g-3p	NDUFC2	mirtarbase	23824327 / 26701625
hsa-miR-1273g-3p	NME1-NME2	mirtarbase	27292025
hsa-miR-1273g-3p	NUDT16	mirtarbase	19536157
hsa-miR-1273g-3p	PAICS	mirtarbase	23446348
hsa-miR-1273g-3p	PGK1	mirtarbase	19536157
hsa-miR-1273g-3p	PGM3	mirtarbase	23824327
hsa-miR-1273g-3p	PRPS1	mirtarbase	27292025
hsa-miR-1273g-3p	PTEN	mirtarbase	27423040
hsa-miR-1273g-3p	SC5D	mirtarbase	23824327
hsa-miR-1273g-3p	SEPHS1	mirtarbase	26701625 / 27292025
hsa-miR-1273g-3p	SETD1A	mirtarbase	23313552
hsa-miR-1273g-3p	UGDH	mirtarbase	27292025
hsa-miR-1273g-3p	UQCR11	mirtarbase	27292025
hsa-miR-1273g-3p	ZADH2	mirtarbase	21572407
hsa-miR-1273g-5p	CD38	mirtarbase	23446348 / 21572407
hsa-miR-1273g-5p	MTHFD1	mirtarbase	22100165 / 23706177
hsa-miR-1273g-5p	NDUFA2	mirtarbase	23592263
hsa-miR-1273g-5p	SGMS1	mirtarbase	26701625
hsa-miR-1273g-5p	SHMT1	mirtarbase	21572407
hsa-miR-1273h-3p	COX8A	mirtarbase	27292025
hsa-miR-1273h-3p	CPS1	mirtarbase	23313552
hsa-miR-1273h-3p	CYP27C1	mirtarbase	22012620
hsa-miR-1273h-3p	HACD3	mirtarbase	22100165
hsa-miR-1273h-3p	SETD1B	mirtarbase	23592263
hsa-miR-1273h-3p	UGCG	mirtarbase	26701625
hsa-miR-1273h-5p	ACAA2	mirtarbase	23824327 / 23313552
hsa-miR-1273h-5p	ACADL	mirtarbase	23592263
hsa-miR-1273h-5p	ADCY5	mirtarbase	19536157
hsa-miR-1273h-5p	AGXT2	mirtarbase	23313552
hsa-miR-1273h-5p	ALDOA	mirtarbase	26701625
hsa-miR-1273h-5p	ASPA	mirtarbase	27292025
hsa-miR-1273h-5p	ATP6AP1	mirtarbase	23313552
hsa-miR-1273h-5p	ATP6V1A	mirtarbase	23824327
hsa-miR-1273h-5p	BPNT1	mirtarbase	23824327
hsa-miR-1273h-5p	CERS4	mirtarbase	27418678
hsa-miR-1273h-5p	COX6B1	mirtarbase	23706177
hsa-miR-1273h-5p	CYP2W1	mirtarbase	23592263 / 23446348 / 20371350
hsa-miR-1273h-5p	CYP51A1	mirtarbase	27292025
hsa-miR-1273h-5p	DHODH	mirtarbase	23313552 / 27292025
hsa-miR-1273h-5p	FAHD1	mirtarbase	26701625
hsa-miR-1273h-5p	GCDH	mirtarbase	23592263
hsa-miR-1273h-5p	GGCX	mirtarbase	23824327
hsa-miR-1273h-5p	GLUL	mirtarbase	23313552
hsa-miR-1273h-5p	HEXA	mirtarbase	27292025
hsa-miR-1273h-5p	HSD17B12	mirtarbase	23824327
hsa-miR-1273h-5p	INMT	mirtarbase	23313552
hsa-miR-1273h-5p	MAT2A	mirtarbase	23592263 / 23446348 / 20371350
hsa-miR-1273h-5p	MBOAT2	mirtarbase	22012620
hsa-miR-1273h-5p	MMAB	mirtarbase	23824327
hsa-miR-1273h-5p	MSMO1	mirtarbase	27292025
hsa-miR-1273h-5p	NDUFA7	mirtarbase	23824327 / 27292025
hsa-miR-1273h-5p	NDUFS5	mirtarbase	23313552
hsa-miR-1273h-5p	NPR1	mirtarbase	23824327
hsa-miR-1273h-5p	PCCB	mirtarbase	26701625
hsa-miR-1273h-5p	PDE7A	mirtarbase	23824327
hsa-miR-1273h-5p	PDE7B	mirtarbase	23592263
hsa-miR-1273h-5p	PFKFB3	mirtarbase	23592263 / 26701625
hsa-miR-1273h-5p	PGAM1	mirtarbase	26701625
hsa-miR-1273h-5p	PGAM4	mirtarbase	23592263 / 26701625
hsa-miR-1273h-5p	PGM2L1	mirtarbase	23592263
hsa-miR-1273h-5p	PLCD3	mirtarbase	26701625
[truncated: 23,955 more rows]

## Sheet: Table S3
ID	LncRNA name	Species	Biological processes	Cellular component	Molecular fucntions	Clinical applications	Disease	Disease category	drug Resistance/chemoresistance/stress	Mutation	Methods	Sample	Organoid	Expression pattern	Function type	Interaction target	Mode of interaction	Expression pattern of Interaction target	Level of interaction	Type of interaction	Detailed Pathway	PMID	Year	Description of disease/function/interaction
EL0044	AABR07005593.1	Homo sapiens	Disease-relevant functions	N/A	Gene regulation	N/A	N/A	N/A	PM2.5	N/A	knockdown, Western blot	PM2.5-treated NR8383 cells	N/A	up-regulated	interaction	MCCC1	Regulate	down-regulated	lncRNA-Protein	binding	AABR07005593.1|bind|MCCC1|promote| potentiates PM(2.5)-induced interleukin-6 expression	34619471	2021	lncRNA AABR07005593.1 potentiates PM(2.5)-induced interleukin-6 expression by targeting MCCC1.
EL0060	ABHD11-AS1	Homo sapiens	Cell proliferation	N/A	Signaling pathways regulation	Promote disease	epithelial ovarian cancer	Cancer	N/A	N/A	Immunohistochemistry, western blot, qRT-PCR, chIP, RIP, knockdown	EOC tissues and cell lines	N/A	up-regulated	interaction	EZH2	Regulate	N/A	lncRNA-Protein	binding	ABHD11-AS1ä¸¨silenceä¸¨TIMP2ä¸¨byä¸¨binding toä¸¨chromatin-modifying enzyme EZH2	31568657	2019	lncRNA ABHD11-AS1, regulated by the EGFR pathway, contributes to the ovarian cancer tumorigenesis by epigenetically suppressing TIMP2.
EL0118	AC020978	Homo sapiens	Disease-relevant functions	N/A	Recruiting protein complexes	DiseaseÂ treatment	non-small cell lung cancer	Cancer	N/A	N/A	knockdown, Western blot	non-small cell lung cancer cells	N/A	up-regulated	interaction	MDH2	Regulate	up-regulated	lncRNA-Protein	binding	AC020978|bind|MDH2|activate| the AKT pathway|promote| non-small cell lung cancer progression	34424600	2021	LncRNA AC020978 facilitates non-small cell lung cancer progression by interacting with malate dehydrogenase 2 and activating the AKT pathway.
EL0119	AC021078.1	Homo sapiens	Disease-relevant functions	Cytoplasm	Recruiting protein complexes	Inhibit disease	prostate cancer	Cancer	N/A	N/A	qRT-PCR, knockdown, Western blot, overexpression, Luciferase reporter assays	22Rv1 and DU145 cell lines	N/A	down-regulated	interaction	PTEN	Regulate	down-regulated	lncRNA-Protein	binding	TUG1 and CTB-89H12.4|bind| PTEN |inhibit| prostate cancer	26975529	2016	The tumour-suppressive function of two lncRNAs (TUG1 and CTB-89H12.4) and their regulation of PTEN expression in prostate cancer.
EL0145	AC069294.1	Homo sapiens	Metabolic	N/A	mRNA translation regulation	DiseaseÂ treatment	N/A	N/A	N/A	rs2242480	knockdown, Overexpression	Huh7 cells	N/A	up-regulated	interaction	CYP3A4	Regulate	down-regulated	lncRNA-Protein	regulation	AC069294.1|downregulate|CYP3A4|promote|drug-metabolizing	34320606	2022	Knockdown of AC069294.1 in Huh7 cells increased CYP3A4 mRNA ~3-fold, whereas overexpression of AC069294.1 decreased CYP3A4 mRNA by 89%., when AC069294.1 was knocked down or overexpressed, indicating dual effects of AC069294.1 on both CYP3A4 and CYP3A5 expression.
EL0145	AC069294.1	Homo sapiens	Metabolic	N/A	mRNA translation regulation	DiseaseÂ treatment	N/A	N/A	N/A	rs2242480	knockdown	Huh7 cells	N/A	up-regulated	interaction	CYP3A5	Regulate	down-regulated	lncRNA-Protein	regulation	AC069294.1|downregulate|CYP3A5|promote|drug-metabolizing	34320606	2022	Knockdown of AC069294.1 in Huh7 cells increased CYP3A4 mRNA ~3-fold, whereas overexpression of AC069294.1 decreased CYP3A4 mRNA by 89%., when AC069294.1 was knocked down or overexpressed, indicating dual effects of AC069294.1 on both CYP3A4 and CYP3A5 expression.
EL0207	ACTA2-AS1	Homo sapiens	Apoptosis	N/A	Recruiting protein complexes	DiseaseÂ treatment	non-small cell lung cancer	Cancer	DDP	N/A	qRT-PCR, Western blot, RIP, RNA Pull-down	cisplatin-resistant NSCLC cell lines	N/A	down-regulated	interaction	EZH2	Regulate	down-regulated	lncRNA-Protein	binding	ACTA2-AS1|bind|EZH2|downregulate|TSC2|inhibit|cisplatin resistance of non-small cell lung cancer cells	34985374	2022	Long non-coding RNA ACTA2-AS1 inhibits the cisplatin resistance of non-small cell lung cancer cells through inhibiting autophagy by suppressing TSC2.
EL0208	ACTG1P25	Homo sapiens	Disease-relevant functions	nucleus and cytoplasm	Recruiting protein complexes	Therapeutic target	esophageal squamous cell carcinoma	Cancer	N/A	N/A	Knockdown, qRT-PCR, western blot, RNA pull-down, RIP, FISH, ChIP, IP, Luciferase reporter assays	Het-1A, NE-1, and HCT-116 cells, KYSE30, KYSE510, KYSE150, KYSE520, KYSE70, and KYSE180 cells, TE-1, TE-9, and TE-15 cells, female BALB/c nu/nu mice	N/A	up-regulated	interaction	PFKFB3	Regulate	up-regulated	lncRNA-Protein	binding	AGPGä¸¨bind ä¸¨PFKFB3|promote|ESCC	32198345	2020	AGPG is directly associated with PFKFB3.
EL0211	ADAMTS9-AS2	Homo sapiens	Cell proliferation	N/A	Transcription regulation	DiseaseÂ treatment	hepatocellular carcinoma	Cancer	Melittin	N/A	qRT-PCR, Western blot	HCC cells	N/A	down-regulated	interaction	DNMT1	Regulate	up-regulated	lncRNA-Protein	regulation	ADAMTS9-AS2|downregulate|DNMT1|inhibit|HCC.	36535531	2023	MEL treatment inhibited the expression of DNA methyltransferase protein-1 (DNMT1), which acted as the role of demethylation, and then up-regulated the expression of ADAMTS9-AS2, affecting the development of HCC.
EL0235	AFAP1-AS1	Homo sapiens	Disease-relevant functions	N/A	Recruiting protein complexes	Prognosis	non-small cell lung cancer	Cancer	N/A	N/A	qRT-PCR, RIP, ChIP	NSCLC tissues and cell lines	N/A	up-regulated	interaction	EZH2	Regulate	up-regulated	lncRNA-Protein	binding	AFAP1-AS1ä¸¨bindä¸¨EZH2ä¸¨ downregulateä¸¨p21 expression|promote|NSCLC	29793547	2018	LncRNA AFAP1-AS1 may serve as a candidate prognostic biomarker and target for new therapies in human NSCLC
EL0235	AFAP1-AS1	Homo sapiens	Cell proliferation	N/A	Recruiting protein complexes	DiseaseÂ diagnosis	colorectal cancer	Cancer	N/A	N/A	knockdown	subcutaneous mouse xenograft model system	N/A	up-regulated	interaction	EZH2	Regulate	up-regulated	lncRNA-Protein	binding	AFAP1-AS1 |bind|EZH2 |promote| colorectal cancer	29888110	2018	Long noncoding RNA AFAP1-AS1 facilitates tumor growth through enhancer of zeste homolog 2 in colorectal cancer.
EL0235	AFAP1-AS1	Homo sapiens	Cell proliferation	N/A	Signaling pathways regulation	Promote disease	gastric cancer	Cancer	N/A	N/A	Knockdown, qRT-PCR, western blot, ChIP, RIP	GC tissues, GC cells (SGC-7901 and AGS cells)	N/A	up-regulated	interaction	EZH2	Regulate	N/A	lncRNA-Protein	binding	AFAP1-AS1ä¸¨bind toä¸¨EZH2.	32016968	2020	LncRNA AFAP1-AS1 accelerates the proliferative and migratory abilities of GC cells by downregulating the expression of KLF2, thus promoting the progression of GC.
EL0235	AFAP1-AS1	Homo sapiens	Disease-relevant functions	N/A	Recruiting protein complexes	DiseaseÂ treatment	pre-eclampsia	Others	N/A	N/A	knockdown	lens epithelial cells	N/A	up-regulated	interaction	EZH2	Regulate	up-regulated	lncRNA-Protein	binding	AFAP1-AS1|bind|EZH2|downregulate|DUSP5|promote| cell proliferation and migration in pre-eclampsia	34192359	2021	silencing of AFAP1-AS1 LncRNA impairs cell proliferation and migration by epigenetically promoting DUSP5 expression in pre-eclampsia.AFAP1-AS1 interacts with EZH2 and inhibits DUSP5 expression through modulating H3K27m3 in the DUSP5 promoter of trophoblast cells, thus being involved in PE pathogenesis.
EL0238	AGAP2-AS1	Homo sapiens	Disease-relevant functions	N/A	Recruiting protein complexes	Promote disease	lung cancer	Cancer	N/A	N/A	knockdown	human NSCLC tissues	N/A	up-regulated	interaction	EZH2	Regulate	up-regulated	lncRNA-Protein	binding	AGAP2-AS1ä¸¨bindä¸¨EZH2 and LSD1 | downregulateä¸¨LATS2/KLF2 Expressionä¸¨promoteä¸¨Non-Small-Cell Lung Cancer	27195672	2016	AGAP2-AS1 may act as an oncogene by repressing tumor-suppressor LATS2 and KLF2 transcription.
EL0238	AGAP2-AS1	Homo sapiens	Disease-relevant functions	N/A	Recruiting protein complexes	Promote disease	gastric cancer	Cancer	N/A	N/A	qRT-PCR, RIP	normal tissues, GC tissues and cell lines	N/A	up-regulated	interaction	EZH2	Regulate	up-regulated	lncRNA-Protein	binding	AGAP2-AS1ä¸¨bindä¸¨LSD1 / EZH2ä¸¨downregulate| P22/ E-cadherin|promote|NSCLC	28209205	2017	The lncRNA AGAP2-AS1 was identified as an oncogenic lncRNA in human non-small cell lung cancer (NSCLC).
EL0238	AGAP2-AS1	Homo sapiens	Cell proliferation	N/A	Recruiting protein complexes	Promote disease	pancreatic cancer	Cancer	N/A	N/A	qRT-PCR, overexpression, FISH, RIP, ChIP	PC tissues	N/A	up-regulated	interaction	EZH2	Regulate	up-regulated	lncRNA-Protein	binding	AGAP2-AS1ä¸¨bindä¸¨EZH2ä¸¨downregulateä¸¨ expression of ANKRD1 /ANGPTL4ä¸¨promoteä¸¨PC proliferation and metastasis	30814490	2019	RREB1-induced upregulation of the lncRNA AGAP2-AS1 regulates the proliferation and migration of pancreatic cancer partly through suppressing ANKRD1 and ANGPTL4.
EL0238	AGAP2-AS1	Homo sapiens	Disease-relevant functions	N/A	Recruiting protein complexes	DiseaseÂ diagnosis	glioblastoma	Cancer	N/A	N/A	knockdown, overexpression	GBM tissues and cells	N/A	up-regulated	interaction	EZH2	Regulate	up-regulated	lncRNA-Protein	binding	AGAP2-AS1ä¸¨bindä¸¨EZH2 and LSD1ä¸¨downregulateä¸¨TFPI2 ä¸¨promoteä¸¨glioblastoma	31186379	2019	Long non-coding RNA AGAP2-AS1 exerts oncogenic properties in glioblastoma by epigenetically silencing TFPI2 through EZH2 and LSD1.
EL0249	AIRN	Homo sapiens	Cell proliferation	N/A	Recruiting protein complexes	Therapeutic target	liver fibrosis	Others	N/A	N/A	qRT-PCR, ChIP, RIP, RNA Pull-down, gain- and loss-of functions assays	human fibrotic livers and serums	N/A	up-regulated	interaction	EZH2	Regulate	up-regulated	lncRNA-Protein	binding	Airn|bind|EZH2|regulate|KLF2-eNOS-sGC pathway|promote| HC proliferation	36171606	2022	LncRNA Airn maintains LSEC differentiation to alleviate liver fibrosis via the KLF2-eNOS-sGC pathway.
EL0290	AK044604	Homo sapiens	Autophagy	Cytoplasm	Regulate the expression of proteins	Promote disease	podocyte injury in diabetic nephropathy	Others	N/A	N/A	qRT-PCR, Western blot	DN mice	N/A	up-regulated	interaction	SIRT1	Regulate	down-regulated	lncRNA-Protein	regulation	AK044604|downregulate|Sirt1|upregulate|GSK3Î²|promote|podocyte injury in diabetic nephropathy	35614465	2022	LncRNA AK044604 could inhibit autophagy by regulating the Sirt1/GSK3Î² axis, thereby aggravating podocyte injury in DN
EL0382	AL355338	Homo sapiens	Metabolic	N/A	Gene regulation	Therapeutic target	non-small cell lung cancer	Cancer	N/A	N/A	qRT-PCR, Western blot	Non-small cell lung cancer cells	N/A	up-regulated	interaction	ENO1	Regulate	down-regulated	lncRNA-Protein	binding	AL355338|bind|ENO1|upregulate| EGFR/AKT pathway |promote| NSCLC.	34627260	2021	AL355338 acts as an oncogenic LncRNA by interacting with protein ENO1 to regulate EGFR/AKT pathway in NSCLC.
EL0433	ALOX12-AS1	Homo sapiens	Disease-relevant functions	N/A	Gene regulation	N/A	N/A	N/A	N/A	N/A	FISH	monocytic THP-1 cells	N/A	up-regulated	interaction	ALOX12	Regulate	down-regulated	lncRNA-Protein	regulation	ALOX12-AS1|downregulate|ALOX12 |promote| form an antisense-sense duplex providing the basis of a novel ALOX12 regulatory mechanism	34174394	2021	the uncharacterized ALOX12-AS1 long non-coding RNA (lncRNA) may bind to the sense coding ALOX12 mRNA to form an antisense-sense duplex providing the basis of a novel ALOX12 regulatory mechanism
EL0492	ARAP1-AS1	Homo sapiens	Disease-relevant functions	N/A	Transcription regulation	Metastasis	cervical cancer	Cancer	N/A	N/A	knockdown	cervical cancer cells	N/A	up-regulated	interaction	EZH2	Regulate	up-regulated	lncRNA-Protein	binding	ARAP1-AS1|bind|EZH2|upregulate|DUSP5|promote|cervical cancer	32985327	2020	mechanism experiments proved that ARAP1-AS1 recruited enhancer of zeste 2 polycomb repressive complex 2 subunit (EZH2) to regulate DUSP5 expression. Finally, rescue assays certified the oncogenic function of ARAP1-AS1/EZH2/DUSP5 axis in cervical cancer.
EL0492	ARAP1-AS1	Homo sapiens	Disease-relevant functions	Nucleus	Recruiting protein complexes	Therapeutic target	lung adenocarcinoma	Cancer	N/A	N/A	qRT-PCR, knockdown, Western blot, Luciferase reporter assays, RIP	two LUAD cell lines (H1975 and A549), a normal human bronchial epithelial cell line BEAS-2B	N/A	up-regulated	interaction	EZH2	Regulate	up-regulated	lncRNA-Protein	binding	ARAP1-AS1| bind | EZH2 | downregulate | ARAP1 | promote | cell proliferation, migration and invasion in LUAD	35291911	2022	ARAP1-AS1 recruited EZH2 to silence ARAP1, facilitating cell proliferation, migration and invasion in LUAD
EL0690	BANCR	Homo sapiens	Cell proliferation	N/A	Signaling pathways regulation	Inhibit disease	papillary thyroid carcinoma	Cancer	N/A	N/A	qRT-PCR, knockdown, RIP	PTC tissue, cell line (IHH-4)	N/A	up-regulated	interaction	EZH2	Regulate	N/A	lncRNA-Protein	binding	silencing BANCRä¸¨led toä¸¨decreased chromatin recruitment of EZH2ä¸¨resultedä¸¨reduced expression of TSHR	26323637	2016	The expression of BANCR was significantly up-regulated while PTCSC3 and NAMA were significantly down-regulated in papillary thyroid carcinoma (PTC) compared to that in normal tissue. BANCR-knockdown in a PTC-derived cell line (IHH-4) resulted in significant suppression of thyroid stimulating hormone receptor (TSHR). BANCR-knockdown also led to inhibition of cell growth and cell cycle arrest at G0…
EL0699	BC009639	Homo sapiens	EMT	N/A	Recruiting protein complexes	Promote disease	lung adenocarcinoma	Cancer	EGFR-tyrosine kinase inhibitors	N/A	qRT-PCR, knockdown, Western blot, overexpression, Luciferase reporter assays	lung cancer cells	N/A	up-regulated	interaction	IMPAD1	Regulate	down-regulated	lncRNA-Protein	regulation	BC009639 |regulate| IMPAD1 alternative splicing |promote| lung adenocarcinoma progression	36650118	2023	BC promotes lung adenocarcinoma progression by modulating IMPAD1 alternative splicing
EL0730	BCYRN1	Homo sapiens	Cell Differentiation	N/A	Gene regulation	Promote disease	esophageal squamous cell cancer	Cancer	N/A	N/A	qRT-PCR, Western blot	normal esophageal squamous epithelial cells, ESCC cells, xenograft mouse mode	N/A	up-regulated	interaction	PSAT1	Regulate	down-regulated	lncRNA-Protein	regulation	BC200|downregulate|PSAT1|promote| the metastasis of ESCC cells	32974142	2020	BC200 promoted the metastasis of ESCC cells and could regulate the expression of ATF4 and its downstream genes.
EL0734	BDNF-AS	Homo sapiens	Disease-relevant functions	N/A	Gene regulation	DiseaseÂ diagnosis	alcohol use disorder	Others	N/A	N/A	qRT-PCR, Knockdown, western blot, RIP, RNA pull-down, dual-luciferase reporter	postmortem amygdala of either early onset or late onset alcoholics (individuals who began drinking before or after 21 years of age, respectively) and age-matched control subjects.	N/A	up-regulated	interaction	EZH2	Regulate	N/A	lncRNA-Protein	binding	Upregulation of BDNF-ASä¸¨associated withä¸¨a significant decreaseä¸¨inä¸¨BDNF expression and increased recruitment of EZH2ä¸¨depositsä¸¨repressive H3K27 trimethylation (H3K27me3) ä¸¨in the BDNF gene	30728347	2019	In the early onset AUD group.
EL0734	BDNF-AS	Homo sapiens	Disease-relevant functions	N/A	Transcription regulation	DiseaseÂ diagnosis	colorectal cancer	Cancer	N/A	N/A	qRT-PCR, western blot, RNA pull-down, RIP, ChIP	CRC tissues and cell lines	N/A	down-regulated	interaction	EZH2	Regulate	N/A	lncRNA-Protein	binding	lncRNA BDNF-ASä¸¨functioned asä¸¨a tumour suppressorä¸¨inä¸¨CRC progressionä¸¨byä¸¨suppressingä¸¨GSK-3Î² expressionä¸¨throughä¸¨binding toä¸¨EZH2 and H3K27me3ä¸¨withä¸¨the GSK-3Î² promoter	31062382	2019	BDNF-AS functioned as a tumour suppressor in CRC progression by suppressing GSK-3Î² expression through binding to EZH2 and H3K27me3 with the GSK-3Î² promoter, shedding light on the diagnosis and therapy for CRC.
EL0742	BGLT3	Homo sapiens	Disease-relevant functions	N/A	Gene regulation	DiseaseÂ treatment	papillary thyroid carcinoma	Cancer	N/A	N/A	qRT-PCR, RNA Pull-down, overexpression, Luciferase reporter assays, ChIP	PTC cells	N/A	down-regulated	interaction	PTEN	Regulate	up-regulated	lncRNA-Protein	regulation	BGL3|upregulate|PTEN| inhibit| papillary thyroid carcinoma progression	33543443	2021	BGL3 inhibits papillary thyroid carcinoma progressionÂ via regulating PTEN stability
EL0748	BLACAT1	Homo sapiens	Cell proliferation	N/A	Sponging miRNAs	Therapeutic target	prostate cancer	Cancer	N/A	N/A	luciferase assay, RIP, ChIP, qRT-PCR	prostate cancer cell lines	N/A	down-regulated	interaction	DNMT1	Regulate	up-regulated	lncRNA-Protein	binding	BLACAT1ä¸¨bindä¸¨EZH2/DNMT1 /HDAC3|inhibit|prostate cancer	31957820	2020	Long non-coding RNA BLACAT1 inhibits prostate cancer cell proliferation through sponging miR-361.
EL0748	BLACAT1	Homo sapiens	Disease-relevant functions	N/A	Transcription regulation	DiseaseÂ diagnosis	esophageal squamous cell carcinoma	Cancer	N/A	N/A	qRT-PCR, western blot, luciferase assay	esophageal squamous cell carcinoma tissues	N/A	up-regulated	interaction	EZH2	Regulate	N/A	lncRNA-Protein	binding	Long noncoding RNA linc-UBC1ä¸¨promotesä¸¨tumor invasion and metastasisä¸¨byä¸¨regulatingä¸¨EZH2ä¸¨ repressingä¸¨E-cadherinä¸¨in esophageal squamous cell carcinoma	29552776	2018	Knockdown of linc-UBC1 could suppress the protein level of EZH2 and promote the protein level of E-cadherin.
EL0748	BLACAT1	Homo sapiens	Cell proliferation	N/A	Sponging miRNAs	Therapeutic target	prostate cancer	Cancer	N/A	N/A	luciferase assay, RIP, ChIP, qRT-PCR	prostate cancer cell lines	N/A	down-regulated	interaction	EZH2	Regulate	up-regulated	lncRNA-Protein	binding	BLACAT1ä¸¨bindä¸¨EZH2/DNMT1 /HDAC3|inhibit|prostate cancer	31957820	2020	Long non-coding RNA BLACAT1 inhibits prostate cancer cell proliferation through sponging miR-361.
EL0748	BLACAT1	Homo sapiens	Proliferation	N/A	Gene regulation	Inhibit disease	pancreatic cancer	Cancer	N/A	N/A	knockdown	PC cells	N/A	up-regulated	interaction	EZH2	Regulate	up-regulated	lncRNA-Protein	binding	BLACAT1|bind| EZH2| promote|Proliferation, Migration and Aerobic Glycolysis of Pancreatic Cancer Cells	33072570	2020	LncRNA-BLACAT1 Facilitates Proliferation, Migration and Aerobic Glycolysis of Pancreatic Cancer Cells by Repressing CDKN1C via EZH2-Induced H3K27me3.
EL0797	C20orf204	Homo sapiens	Disease-relevant functions	N/A	Gene regulation	Therapeutic target	ovarian cancer	Cancer	N/A	N/A	Knockdown,qRT-PCR,dual-luciferase reporter gene assay, ChIP,RIP	ovarian cancer tissues, ovarian cancer cell lines	N/A	up-regulated	interaction	CP	Regulate	N/A	lncRNA-DNA	binding	LINC00176 and promoter region of CPä¸¨turned outä¸¨to be positiveä¸¨viaä¸¨BCL3ä¸¨byä¸¨means of dual-luciferase reporter gene assay, ChIP and RIP assays	31668012	2020	restored LINC00176 initiates tumorigenesis in ovarian cancer by increasing CP expression via recruiting BCL3, the mechanism of which represented a potential and promising therapeutic target for the disease.
EL0814	CACNA1G-AS1	Homo sapiens	Cell proliferation	N/A	Gene regulation	DiseaseÂ diagnosis	colorectal cancer	Cancer	N/A	N/A	qRT-PCR, western blot, RIP, ChIP, knockdown	HCT116 and SW480 cells	N/A	up-regulated	interaction	EZH2	Regulate	N/A	lncRNA-Protein	binding	CACNA1G-AS1ä¸¨interact withä¸¨EZH2	31957825	2020	CACNA1G-AS1 downregulates p53 level by forming a carcinogenic complex with EZH2, thereby enhancing the proliferative and invasive abilities of CRC cells.
EL0816	CACS15	Homo sapiens	Disease-relevant functions	N/A	Signaling pathways regulation	DiseaseÂ diagnosis	ovarian cancer	Cancer	N/A	N/A	qRT-PCR, knockdown, ChIP	OC cells	N/A	up-regulated	interaction	EZH2	Regulate	N/A	lncRNA-Protein	binding	CACS15ä¸¨distributedä¸¨inä¸¨cytoplasm of OC cellsä¸¨interacted withä¸¨EZH2ä¸¨at post-transcriptional level	31737207	2019	LncRNA CACS15 accelerates the malignant progression of ovarian cancer through stimulating EZH2-induced inhibition of APC.
EL0820	CAHM	Homo sapiens	Cell proliferation	N/A	Transcription regulation	Inhibit disease	glioma	Cancer	N/A	N/A	overexpression	glioma cells	N/A	down-regulated	interaction	DNMT1	Regulated	up-regulated	lncRNA-Protein	regulation	DNMT1|mediate|CAHM hypermethylation	34227028	2022	CAHM is hypermethylated by DNMT1.
EL0820	CAHM	Homo sapiens	Disease-relevant functions	Cytoplasm	Gene regulation	DiseaseÂ treatment	glioma	Cancer	N/A	N/A	qRT-PCR, knockdown, overexpression, Luciferase reporter assays	glioma samples	N/A	down-regulated	interaction	DNMT1	Regulated	up-regulated	lncRNA-Protein	regulation	CAHM|hypermethylated|DNMT1|reversed 5-Aza|through SPAK/MAPK pathway|suppress |glioma	34227028	2022	CAHM is hypermethylated by DNA methyltransferase1 (DNMT1) and the loss of CAHM expression could be reversed by 5-Aza-2'-deoxycytidine (5-Aza), a specific inhibitor of DNA methyltransferases and CAHM overexpression suppressed glioma migration and invasion through SPAK/MAPK pathway.
EL0840	CASC11	Homo sapiens	EMT	N/A	Signaling pathways regulation	Promote disease	hepatocellular carcinoma	Cancer	N/A	N/A	overexpression, knockdown, Loss of function	HCC tissues and cell lines	N/A	up-regulated	interaction	EZH2	Regulate	N/A	lncRNA-Protein	binding	CASC11ä¸¨activatedä¸¨byä¸¨the transcription factor STAT3	30503497	2019	STAT3-induced upregulation of lncRNA CASC11 promotes the cell migration, invasion and epithelial-mesenchymal transition in hepatocellular carcinoma by epigenetically silencing PTEN and activating PI3K/AKT signaling pathway.
EL0842	CASC15	Homo sapiens	Disease-relevant functions	N/A	Gene regulation	Promote disease	melanoma	Cancer	N/A	N/A	knockdown, Overexpression	melanoma tissues	N/A	up-regulated	interaction	EZH2	Regulate	N/A	lncRNA-Protein	binding	CASC15 ä¸¨silencedä¸¨the expression of programmed cell death 4 (PDCD4)ä¸¨byä¸¨recruitingä¸¨EZH2ä¸¨increasingä¸¨ H3K27me3 levelä¸¨at the promoter region of PDCD4	30013768	2018	Long non-coding RNA CASC15 promotes melanoma progression by epigenetically regulating PDCD4.
EL0852	CASC9	Homo sapiens	Cell proliferation	N/A	Gene regulation	DiseaseÂ diagnosis	esophageal squamous cell carcinoma	Cancer	N/A	N/A	qRT-PCR, FISH, RIP, RNA pull down,ChIP, knockdown	esophageal squamous cell	N/A	up-regulated	interaction	EZH2	Regulate	N/A	lncRNA-Protein	binding	lncRNA CASC9ä¸¨functions asä¸¨an oncogeneä¸¨byä¸¨negatively regulatingä¸¨PDCD4 expressionä¸¨throughä¸¨recruitingä¸¨EZH2ä¸¨alteringä¸¨H3K27me3 level	28854977	2017	Up-regulation of lncRNA CASC9 promotes esophageal squamous cell carcinoma growth by negatively regulating PDCD4 expression through EZH2
EL0852	CASC9	Homo sapiens	Disease-relevant functions	N/A	Signaling pathways regulation	Promote disease	bladder cancer	Cancer	N/A	N/A	qRT-PCR, Knockdown, Western blot, RIP, chIP	BC tissues and cell lines	N/A	up-regulated	interaction	EZH2	Regulated	down-regulated	lncRNA-Protein	binding	CASC9 | bind | EZH2 | upregulate| PTEN | promote| the progression of BC	32982303	2020	Upregulation of CASC9 induced by STAT3 promoted the progression of BC by interacting with EZH2 and affecting the expression of PTEN, representing a novel regulatory mechanism for BC progression.
EL0862	CBR3-AS1	Homo sapiens	hair follicle stem cell differentiation	N/A	Chromatin regulation	N/A	N/A	N/A	N/A	N/A	qRT-PCR, overexpression, RNA pull-down	hair follicle stem cells	N/A	up-regulated	interaction	EZH2	Regulate	up-regulated	lncRNA-Protein	binding	PlncRNA-1|bind|EZH2	34989071	2022	PlncRNA-1 stimulates hair follicle stem cell differentiation in wound healing via the EZH2/ZEB1/MAPK1 axis.
EL0862	CBR3-AS1	Homo sapiens	Disease-relevant functions	N/A	Gene regulation	Therapeutic target	prostate cancer	Cancer	N/A	N/A	knockdown	PCa tissues	N/A	up-regulated	interaction	PTEN	Regulate	down-regulated	lncRNA-Protein	regulation	PlncRNA-1|downregulate|promote|the progression of prostate Cancer	33848262	2021	LncRNA PlncRNA-1 accelerates the progression of prostate Cancer by regulating PTEN/Akt axis
EL0865	CCAT1	Homo sapiens	OXA resistance	N/A	Recruiting protein complexes	Therapeutic target	colorectal cancer	Cancer	oxaliplatin, ration	N/A	qRT-PCR, knockdown, Western blot, overexpression, Luciferase reporter assays	SW480 cells	N/A	up-regulated	interaction	DNMT1	Regulate	down-regulated	lncRNA-Protein	binding	CCAT1|bind|DNMT1|downregulate|SOCS3|promote|chemoresistance in colorectal cancer	36812959	2023	B-MYB transcriptionally activated CCAT1, which recruited DNMT1 to inhibit SOCS3 expression through elevating the SOCS3 promoter methylation. By this mechanism, the resistance of CRC cells to OXA was enhanced.
EL0868	CCAT2	Homo sapiens	Disease-relevant functions	N/A	Gene regulation	Therapeutic target	gastric cancer	Cancer	N/A	N/A	qRT-PCR, knockdown	gastric cancer cells, adjacent non-tumor tissues	N/A	up-regulated	interaction	EZH2	Regulate	N/A	lncRNA-Protein	binding	CCAT2ä¸¨interacted withä¸¨EZH2ä¸¨regulatedä¸¨the E-cadherin and LATS2 expression	27904778	2016	CCAT2 functioned as an oncogene in GC and was involved in gastric cancer progression. Targeting CCAT2 might be a potential therapeutic target for GC.
EL0868	CCAT2	Homo sapiens	Cell proliferation	N/A	Gene regulation	Therapeutic target	breast cancer	Cancer	N/A	N/A	qRT-PCR, RIP, ChIP, knockdown	The tumor xenograft nude mice	N/A	differential expression	interaction	EZH2	Regulate	N/A	lncRNA-Protein	binding	CCAT2ä¸¨suppressedä¸¨the p15 expression levelä¸¨viaä¸¨interacting withä¸¨EZH2 in breast cancer cells	28531944	2017	Upregulation of CCAT2 promotes cell proliferation by repressing the P15 in breast cancer.
EL0907	CDKN2B-AS1	Homo sapiens	Haematopoiesis and immune responses	N/A	Gene regulation	DiseaseÂ diagnosis	atherosclerosis	Others	N/A	N/A	Overexpression, knockdown	atherosclerotic plaque tissues and THP-1 macrophage-derived foam cells, mouse model	N/A	down-regulated	interaction	DNMT1	Regulate	N/A	lncRNA-Protein	binding	CDKN2B-AS1ä¸¨bind toä¸¨DNA methyltransferase 1 (DNMT1)ä¸¨toä¸¨enhanceä¸¨methylation of ADAM12 promoterä¸¨leading toä¸¨suppressedä¸¨atherosclerotic inflammatory response and promoted cholesterol efflux	30926762	2019	Ong non-coding RNA CDKN2B-AS1 reduces inflammatory response and promotes cholesterol efflux in atherosclerosis by inhibiting ADAM10 expression.
EL0907	CDKN2B-AS1	Homo sapiens	apoptosis and inflammation in vitro	N/A	Recruiting protein complexes	Therapeutic target	childhood asthma	Others	OVA, LPS	N/A	qRT-PCR, knockdown, Western blot, overexpression, Luciferase reporter assays	asthma mice model	N/A	down-regulated	interaction	DNMT1	Regulate	up-regulated	lncRNA-Protein	binding	CDKN2B-AS1|bind|DNMT1|downregulate|ZFP36|downregulate|NR4A1|promote|Childhood Asthma	36422840	2023	CDKN2B-AS1 inhibited ZFP36 expression by recruiting DNMT1 to promote ZFP36 promoter methylation.ZFP36 overexpression facilitated apoptosis, inflammation, and p-p65 expression in BEAS-2B cells, while NR4A1 knockdown reversed these effects.
EL0907	CDKN2B-AS1	Homo sapiens	Cell proliferation	N/A	Gene regulation	Promote disease	adult T-cell leukemia	Cancer	N/A	N/A	chIP, knockdown	HTLV-1-infected cell lines and clinical ATL samples	N/A	up-regulated	interaction	EZH2	Regulate	N/A	lncRNA-Protein	binding	ANRIL/EZH2 complexä¸¨repressedä¸¨p21/CDKN1A transcriptionä¸¨throughä¸¨H3K27 trimethylation of the p21/CDKN1A promoter	30258009	2018	Long Noncoding RNA ANRIL Supports Proliferation of Adult T-Cell Leukemia Cells through Cooperation with EZH2.
EL0907	CDKN2B-AS1	Homo sapiens	Disease-relevant functions	N/A	Gene regulation	DiseaseÂ treatment	multiple myeloma	Cancer	N/A	N/A	qRT-PCR, knockdown, Western blot, overexpression, Luciferase reporter assays, RIP, CHIP	MM patients and cell lines	N/A	up-regulated	interaction	PTEN	Regulate	down-regulated	lncRNA-Protein	binding	ANRIL | bind | PTEN | downregulate | EZH2 expression | abrogate | the effects caused by ANRIL overexpression in MM cells	34034498	2021	ANRIL promotes multiple myeloma progression and bortezomib resistance by EZH2-mediated epigenetically silencing of PTEN
EL0907	CDKN2B-AS1	Homo sapiens	Disease-relevant functions	Nucleoplasm	Gene regulation	Therapeutic target	hypoxia/reoxygenation injury	Others	N/A	N/A	qRT-PCR, knockdown, Western blot, overexpression, Luciferase reporter assays	vitro myocardial ischemia and reperfusion (MI/R) model	N/A	down-regulated	interaction	SIRT1	Regulate	up-regulated	lncRNA-Protein	regulation	ANRIL|spong|miR-181a|upregulateSIRT1|expression	34080028	2021	Critical role of SIRT1 upregulation on the protective effect of lncRNA ANRIL against hypoxia/reoxygenation injury in H9c2 cardiomyocytes.
EL0932	CHASERR	Homo sapiens	cell viability and mobility	Chromatin	Chromatin regulation	Therapeutic target	colon cancer	Cancer	N/A	N/A	gain- and loss-of functions assays	colon cancer cell	N/A	up-regulated	interaction	EZH2	Regulate	N/A	lncRNA-Protein	binding	LINC01578 | bind | EZH2 | in | NFKBIB promoter | downregulate | NFKBIB expression | activate | NF-ÎºB signaling | upregulate| YY1 expression | promote | colon cancer	33040438	2020	Long noncoding RNA LINC01578 drives colon cancer metastasis through a positive feedback loop with the NF-ÎºB/YY1 axis.
EL0947	CIR1	Homo sapiens	Disease-relevant functions	N/A	Gene regulation	DiseaseÂ treatment	osteoarthritis	Others	N/A	N/A	qRT-PCR, knockdown, Western blot, overexpression	mesenchymal stem cells	N/A	down-regulated	interaction	EZH2	Regulate	up-regulated	lncRNA-Protein	regulation	CIR|upregulate|EZH2| inhibit| chondrogenic differentiation of mesenchymal stem cells	33546582	2021	Long non-coding RNA CIR inhibits chondrogenic differentiation of mesenchymal stem cells by epigenetically suppressing ATOH8 via methyltransferase EZH2
EL1027	COSMOC	Homo sapiens	Neuronal differentiation and disorders	N/A	Gene regulation	DiseaseÂ treatment	autism spectrum disorder	Others	N/A	N/A	knockdown	stem cells	N/A	up-regulated	interaction	MOCOS	Regulate	down-regulated	lncRNA-Protein	regulation	lnc Rna COSMOC| inhibit| MOCOS | destabilizes lipid and energy metabolisms of stem cells	32327736	2021	COSMOC reduces MOCOS expression, destabilizes lipid and energy metabolisms of stem cells
EL1045	CRNDE	Homo sapiens	Cell proliferation	N/A	Gene regulation	Therapeutic target	colorectal cancer	Cancer	N/A	N/A	knockdown, RNA immunoprecipitation,chromatin RNA immunoprecipitation assays	CRC tissues	N/A	up-regulated	interaction	EZH2	Regulate	N/A	lncRNA-Protein	binding	LncRNA CRNDEä¸¨suppressä¸¨the expressions of dual-specificity phosphatase 5 (DUSP5) and CDKN1Aä¸¨byä¸¨ binding toä¸¨EZH2 (the key components of Polycomb repressive complex 2 (PRC2))ä¸¨promotingä¸¨CRCä¸¨development	28796262	2017	Evidence indicates that long non-coding RNAs (lncRNAs) play a critical role in the regulation of tumor cellular processes, such as proliferation, apoptosis, and metastasis. LncRNA CRNDE (Colorectal Neoplasia Differentially Expressed) is located at human chromosome 16 and has been found overexpressed in a variety of cancers including colorectal cancer (CRC).
EL1045	CRNDE	Homo sapiens	Disease-relevant functions	N/A	Gene regulation	DiseaseÂ treatment	osteoarthritis	Others	N/A	N/A	qRT-PCR, RNA Pull-down, Western blot, overexpression	BMSCs	N/A	up-regulated	interaction	SIRT1	Regulate	down-regulated	lncRNA-Protein	regulation	lncRNA-CRNDE|downregulate|SIRT1|promote| regulates BMSC chondrogenic differentiation and promotes cartilage repair in osteoarthritis	33479807	2021	lncRNA-CRNDE regulates BMSC chondrogenic differentiation and promotes cartilage repair in osteoarthritis through SIRT1/SOX9
EL1053	CRYM-AS1	Homo sapiens	Disease-relevant functions	N/A	Recruiting protein complexes	DiseaseÂ treatment	gastric cancer	Cancer	N/A	N/A	qRT-PCR, knockdown, Western blot, overexpression, ChIP, RIP	gastric cancer cells, normal gastric cells	N/A	down-regulated	interaction	EZH2	Regulate	up-regulated	lncRNA-Protein	binding	CRYM-AS1 | bind | EZH2 | mediate | CRYM promoter methylation| downregulate | CRYM expression | inhibit | gastric cancer	35414504	2022	CRYM-AS1 directly bound to EZH2 and mediated the CRYM promoter methylation and consequently negatively regulated the expression of CRYM.
EL1063	CTB-193M12.5	Homo sapiens	Cell proliferation	N/A	Recruiting protein complexes	Therapeutic target	hepatocellular carcinoma	Cancer	N/A	N/A	qRT-PCR, Western blot, Northern blot, Dual-luciferase reporter assays, RIP, RNA Pull-down	HCC cell	N/A	up-regulated	interaction	NSD1	Regulate	up-regulated	lncRNA-Protein	binding	CTB-193M12.5|bind|NSD1|upregulate|WNT10B|activate|Wnt/Î²-catenin signaling|promote|Hepatocellular Carcinoma Progression	35698644	2022	CTB-193M12.5 Promotes Hepatocellular Carcinoma Progression via Enhancing NSD1-Mediated WNT10B/Wnt/Î²-Catenin Signaling Activation.
EL1073	CTD-2245E15.3	Homo sapiens	Apoptosis	Cytoplasm	Recruiting protein complexes	DiseaseÂ treatment	non-small cell lung cancer	Cancer	N/A	N/A	knockdown, overexpression	tumor cells	N/A	up-regulated	interaction	PC	Regulate	down-regulated	lncRNA-Protein	binding	CTD-2245E15.3|bind|PC| promote|non-small cell lung cancer growth	33941610	2021	Long noncoding RNA CTD-2245E15.3 promotes anabolic enzymes ACC1 and PC to support non-small cell lung cancer growth.
EL1100	CYTOR	Homo sapiens	Cell proliferation	N/A	Recruiting protein complexes	Therapeutic target	colorectal cancer	Cancer	N/A	N/A	qRT-PCR	CRC samples	N/A	up-regulated	interaction	ENO2	Regulate	up-regulated	lncRNA-Protein	binding	CYTOR|bind|ENO2|inhibit|phosphorylation of YAP1|trigger|EMT	35954207	2022	ENO2 Promotes Colorectal Cancer Metastasis by Interacting with the LncRNA CYTOR and Activating YAP1-Induced EMT.
EL1100	CYTOR	Homo sapiens	Cell proliferation	N/A	Gene regulation	DiseaseÂ diagnosis	lung adenocarcinoma	Cancer	N/A	N/A	qRT-PCR, western bolt, RIP, RNA pulldown, ChIP	LAD tissues and paired normal tissues	N/A	up-regulated	interaction	EZH2	Regulate	N/A	lncRNA-Protein	binding	LINC00152ä¸¨interact withä¸¨EZH2ä¸¨inhibitä¸¨IL24 transcription	28109288	2017	Long intergenic non-coding RNA 00152 promotes lung adenocarcinoma proliferation via interacting with EZH2 and repressing IL24 expression.
EL1100	CYTOR	Homo sapiens	Disease-relevant functions	N/A	Gene regulation	DiseaseÂ treatment	gastric cancer	Cancer	N/A	N/A	qRT-PCR, knockdown, overexpression	CD8(+) T-cell	N/A	up-regulated	interaction	EZH2	Regulate	down-regulated	lncRNA-Protein	binding	Linc00152|bind|EZH2|promote| CD8(+) T-cell infiltration in gastric cancer	33709190	2021	Linc00152 mediates CD8(+) T-cell infiltration in gastric cancer through binding to EZH2 and regulating the CXCL9, 10/CXCR3 axis
EL1108	DANCR	Homo sapiens	Disease-relevant functions	N/A	Gene regulation	Inhibit disease	breast cancer	Cancer	N/A	N/A	knockdown	breast cancer tissues and breast cancer cell lines	N/A	down-regulated	interaction	EZH2	Regulate	N/A	lncRNA-Protein	binding	Underlying modulation of EZH2 stabilityä¸¨byä¸¨linkingä¸¨ANCRä¸¨interaction withä¸¨EZH2ä¸¨toä¸¨promoteä¸¨its ä¸¨phosphorylationä¸¨facilitatesä¸¨EZH2 degradationä¸¨suppressesä¸¨breast cancer progression	27716745	2017	The degradation of EZH2 mediated by lncRNA ANCR attenuated the invasion and metastasis of breast cancer.
EL1108	DANCR	Homo sapiens	Cell Differentiation	N/A	Gene regulation	DiseaseÂ diagnosis	osteosarcoma	Cancer	N/A	N/A	qRT-PCR, RNA pull-down	OS tissues and cell lines	N/A	up-regulated	interaction	EZH2	Regulate	N/A	lncRNA-Protein	regulation	LncRNA-ANCRä¸¨reducedä¸¨the mRNA level of EZH2ä¸¨increasedä¸¨the expression of p21 and p27ä¸¨atä¸¨both mRNA and protein levels	28679390	2017	LncRNA-ANCR (anti-differentiation ncRNA) has been reported to interact with EZH2 and regulated osteoblast differentiation.
EL1108	DANCR	Homo sapiens	Cell Differentiation	N/A	Gene regulation	DiseaseÂ diagnosis	prostate cancer	Cancer	N/A	N/A	qRT-PCR, RNA pull-down	OS tissues and cell lines	N/A	up-regulated	interaction	EZH2	Regulate	N/A	lncRNA-Protein	regulation	LncRNA-ANCRä¸¨reducedä¸¨the mRNA level of EZH2ä¸¨increasedä¸¨the expression of p21 and p27ä¸¨atä¸¨both mRNA and protein levels	28679390	2017	LncRNA-ANCR (anti-differentiation ncRNA) has been reported to interact with EZH2 and regulated osteoblast differentiation.
EL1108	DANCR	Homo sapiens	Cell proliferation	N/A	Signaling pathways regulation	DiseaseÂ diagnosis	cholangiocarcinoma	Cancer	N/A	N/A	knockdown	CCA cells	N/A	up-regulated	interaction	EZH2	Regulate	N/A	lncRNA-Protein	binding	DANCRä¸¨bindä¸¨EZH2ä¸¨modulateä¸¨the histone methylation of promoter of FBP1ä¸¨regulatingä¸¨CCA cells growth and migration	31383847	2019	Long noncoding RNA DANCR regulates proliferation and migration by epigenetically silencing FBP1 in tumorigenesis of cholangiocarcinoma.
EL1108	DANCR	Homo sapiens	Disease-relevant functions	N/A	Gene regulation	DiseaseÂ diagnosis	breast cancer	Cancer	N/A	N/A	RIP,ELISA,CHIP,qRT-PCR,knockdown,overexpression,western blot	breast cancer cell	N/A	up-regulated	interaction	EZH2	Regulate	N/A	lncRNA-Protein	regulation	DANCRä¸¨promotedä¸¨the binding of enhancer of zeste homolog 2 (EZH2)ä¸¨toä¸¨the promoter of SOCS3ä¸¨inhibitingä¸¨SOCS3 expression	31860165	2020	The long non-coding RNA DANCR regulates the inflammatory phenotype of breast cancer cells and promotes breast cancer progression via EZH2-dependent suppression of SOCS3 transcription.
[truncated: 409 more rows]

## Sheet: Table S4
Display_Name	Transcript_ID	Gene_ID	Biotype	Start	End	Chromosome	Description	Canonical_Transcript
[truncated: 14,080 more rows]

## Sheet: Table S5
Display_Name	Transcript_ID	Gene_ID	Biotype	Start	End	Chromosome	Description	Canonical_Transcript
[truncated: 6,446 more rows]

[truncated: 24 more sheets: Table S6, Table S7, Table S8, Table S9, Table S10, Table S11, Table S12, Table S13, Table S14, Table S15, Table S16, Table S17, Table S18, Table S19, Table S20, Table S21, Table S22, Table S23, Table S24, Table S25 …]
